# Supplementary material
Source: publisher figshare collection journal article supplement (https://gsapubs.figshare.com/articles/dataset/_/22251046)
Supplement: Supplementary file 1 [file 2]

## Sheet: Traces_1_Magma
		Ksm	Ksm	Ksm	Ksm	Ksm	Ksm	Isotope 1	Isotope 2	Isotope 3	Recharge 1 Conc	Recharge 1 Isotope 1	Recharge 1 Isotope 2	Recharge 1 Isotope 3
Element	Inital conc	olivine {1}	clinopyroxene {1}	spinel {1}	feldspar {1}	orthopyroxene {1}	rhm-oxide {1}
Ga	19.66	1	1	1	1	1	1				16.24
Rb	26.97	1	1	1	1	1	1				34.85
Sr	321.49	0.0004	0.1283/1130/1.65/740	0.0006/1130/0.2935/740	3.2487/1130/6.815/740	0.0012/1130/0.124/740	0.7/1130/0.552/740	0.702819			193.77	0.702819
Nb	15.74	1	1	1	1	1	1				5.18
Ba	779.26	0.0003	0.0007/1130/0.692/740	0.0005/1130/0.1/740	0.459/1130/0.375/74+	0.0005/1130/0.0735/740	0.09				1015.37
La	20.31	0.0003	0.0536/1130/0.52/740	0.0006/1130/0.66/740	0.124/1130/0.3/740	0.0008/1130/0.4/740	0.0023/1130/1.31/740				51.91
Pb	2.95	1	1	1	1	1	1	0.1	0.1	0.1	7.42	0.1	0.1	0.1
Magma Chamber Process	Magma Temperature (°C)	Wallrock Temperature (°C)	Total Magma Chamber Mass (grams )	Magma Liquid Mass (grams)	Magma: Total Incremental Mass of Crystals (Cumulates) removed as Cumulates (grams)	Magma: Total Cumulative Mass of Crystals (Cumulates) removed as Cumulates (grams)	Magma: Incremental Fluid Phase Mass	Magma: Cumulative Fluid Phase Mass	Magma: Mass Fraction of H2O in Incremental Fluid Phase	Magma Mineral olivine {1} : Incremental Mass (grams) Removed in this Temperature Step	Magma olivine {1} : Total Mass (grams) Removed across all Temperature Steps	Magma Mineral clinopyroxene {1} : Incremental Mass (grams) Removed in this Temperature Step	Magma clinopyroxene {1} : Total Mass (grams) Removed across all Temperature Steps	Magma Mineral spinel {1} : Incremental Mass (grams) Removed in this Temperature Step	Magma spinel {1} : Total Mass (grams) Removed across all Temperature Steps	Magma Mineral feldspar {1} : Incremental Mass (grams) Removed in this Temperature Step	Magma feldspar {1} : Total Mass (grams) Removed across all Temperature Steps	Magma Mineral orthopyroxene {1} : Incremental Mass (grams) Removed in this Temperature Step	Magma orthopyroxene {1} : Total Mass (grams) Removed across all Temperature Steps	Magma Mineral rhm-oxide {1} : Incremental Mass (grams) Removed in this Temperature Step	Magma rhm-oxide {1} : Total Mass (grams) Removed across all Temperature Steps	Magma Melt SiO2 (wt. %)	Magma Melt TiO2 (wt. %)	Magma Melt Al2O3 (wt. %)	Magma Melt Fe2O3 (wt. %)	Magma Melt Cr2O3 (wt. %)	Magma Melt FeO (wt. %)	Magma Melt MnO (wt. %)	Magma Melt MgO (wt. %)	Magma Melt NiO (wt. %)	Magma Melt CoO (wt. %)	Magma Melt CaO (wt. %)	Magma Melt Na2O (wt. %)	Magma Melt K2O (wt. %)	Magma Melt P2O5 (wt. %)	Magma Melt H2O (wt. %)	Magma Melt CO2 (wt. %)	> Elements + Isotopes >	Ga conc in melt, magma chamber	Rb conc in melt, magma chamber	Sr conc in melt, magma chamber	Sr isotopic composition in melt, magma chamber	Nb conc in melt, magma chamber	Ba conc in melt, magma chamber	La conc in melt, magma chamber	Pb conc in melt, magma chamber	Pb1 isotopic composition in melt, magma chamber	Pb2 isotopic composition in melt, magma chamber	Pb3 isotopic composition in melt, magma chamber
FC	1234.57	n/a	98.9509	98.9509	0	0	0	0	0	0	0	0	0	0	0	0	0	0	0	0	0	49.1187	2.17995	11.8893	2.41281	0	9.52162	0.17739	9.91643	0	0	9.4468	2.31018	0.737246	0.238913	2.05075	0		19.66	26.97	321.49	0.702819	15.74	779.26	20.31	2.95	0.1	0.1	0.1
FC	1224.57	n/a	98.95	98.1157	0.834235	0.834235	0	0	0	0.834235	0.834235	0	0	0	0	0	0	0	0	0	0	49.1947	2.19851	11.9905	2.42351	0	9.50274	0.177152	9.60592	0	0	9.52448	2.32984	0.743522	0.240947	2.06821	0		19.66	26.97	324.222	0.702819	15.74	785.884	20.4826	2.95	0.1	0.1	0.1
FC	1214.57	n/a	98.9487	97.1375	0.97694	1.81117	0	0	0	0.97694	1.81117	0	0	0	0	0	0	0	0	0	0	49.2863	2.22065	12.1112	2.43469	0	9.47764	0.176815	9.23887	0	0	9.6171	2.3533	0.75101	0.243373	2.08904	0		19.66	26.97	327.482	0.702819	15.74	793.785	20.6886	2.95	0.1	0.1	0.1
FC	1204.57	n/a	98.9474	96.1946	0.941681	2.75286	0	0	0	0.941681	2.75286	0	0	0	0	0	0	0	0	0	0	49.3771	2.24242	12.2299	2.44553	0	9.44909	0.176432	8.88138	0	0	9.70811	2.37637	0.758372	0.245759	2.10952	0		19.66	26.97	330.686	0.702819	15.74	801.553	20.891	2.95	0.1	0.1	0.1
FC	1194.57	n/a	98.9462	95.2852	0.908101	3.66096	0	0	0	0.908101	3.66096	0	0	0	0	0	0	0	0	0	0	49.4672	2.26382	12.3466	2.45601	0	9.4171	0.176002	8.53332	0	0	9.79752	2.39905	0.765609	0.248104	2.12965	0		19.66	26.97	333.837	0.702819	15.74	809.19	21.0901	2.95	0.1	0.1	0.1
FC	1184.57	n/a	98.945	94.4079	0.876123	4.53708	0	0	0	0.876123	4.53708	0	0	0	0	0	0	0	0	0	0	49.5565	2.28485	12.4614	2.46616	0	9.3817	0.175527	8.1946	0	0	9.88536	2.42134	0.772724	0.25041	2.14944	0		19.66	26.97	336.933	0.702819	15.74	816.697	21.2857	2.95	0.1	0.1	0.1
FC	1174.57	n/a	98.9438	93.5611	0.845674	5.38275	0	0	0	0.845674	5.38275	0	0	0	0	0	0	0	0	0	0	49.6451	2.30554	12.5742	2.47598	0	9.34292	0.175007	7.86507	0	0	9.97167	2.44326	0.779718	0.252676	2.16889	0		19.66	26.97	339.978	0.702819	15.74	824.077	21.4781	2.95	0.1	0.1	0.1
FC	1164.57	n/a	98.9427	92.7432	0.816696	6.19945	0	0	0	0.816696	6.19945	0	0	0	0	0	0	0	0	0	0	49.733	2.32587	12.6851	2.48545	0	9.30075	0.174442	7.54462	0	0	10.0565	2.46481	0.786594	0.254904	2.18802	0		19.66	26.97	342.97	0.702819	15.74	831.332	21.6672	2.95	0.1	0.1	0.1
FC	1154.57	n/a	98.9416	91.953	0.789134	6.98858	0	0	0	0.789134	6.98858	0	0	0	0	0	0	0	0	0	0	49.8203	2.34586	12.7941	2.4946	0	9.25521	0.173833	7.2331	0	0	10.1398	2.48599	0.793354	0.257095	2.20683	0		19.66	26.97	345.913	0.702819	15.74	838.464	21.853	2.95	0.1	0.1	0.1
FC	1144.57	n/a	98.9405	91.1889	0.76294	7.75152	0	0	0	0.76294	7.75152	0	0	0	0	0	0	0	0	0	0	49.9069	2.36551	12.9013	2.50341	0	9.20631	0.173181	6.93038	0	0	10.2216	2.50682	0.800001	0.259249	2.22532	0		19.66	26.97	348.805	0.702819	15.74	845.477	22.0358	2.95	0.1	0.1	0.1
RFC	1152.98		123.883	116.133	-0.00151967	7.75	0	0	0	0	7.75	0	0	0	0	0	0	0	0	0	0	53.8664	1.93923	13.4315	2.11441	0	7.67147	0.150129	5.68301	0	0	8.4578	3.22141	1.15754	0.233373	2.07371	0		18.9241	28.6655	315.447	0.702819	13.4678	882.032	28.4638	3.9118	0.1	0.1	0.1
FC	1142.98	n/a	123.884	116.134	0	7.75	0	0	0	0	7.75	0	0	0	0	0	0	0	0	0	0	53.8659	1.93921	13.4314	2.12317	0	7.6635	0.150128	5.68296	0	0	8.45773	3.22138	1.15753	0.233371	2.07369	0		18.9241	28.6655	315.447	0.702819	13.4678	882.032	28.4638	3.9118	0.1	0.1	0.1
FC	1132.98	n/a	123.885	115.872	0.2621	8.0121	0	0	0	0.2621	8.0121	0	0	0	0	0	0	0	0	0	0	53.8987	1.9436	13.4617	2.13022	0	7.63895	0.149854	5.59972	0	0	8.4761	3.22866	1.16014	0.233899	2.07837	0		18.9241	28.6655	316.16	0.702819	13.4678	884.027	28.5281	3.9118	0.1	0.1	0.1
FC	1122.98	n/a	123.883	115.046	0.824667	8.83677	0	0	0	0.824667	8.83677	0	0	0	0	0	0	0	0	0	0	54.0048	1.95755	13.5584	2.13213	0	7.57541	0.148933	5.33894	0	0	8.53461	3.25185	1.16847	0.235578	2.0933	0		18.9241	28.6655	318.426	0.702819	13.4678	890.362	28.7326	3.9118	0.1	0.1	0.1
FC	1112.98	n/a	123.881	114.248	0.797082	9.63385	0	0	0	0.797082	9.63385	0	0	0	0	0	0	0	0	0	0	54.1096	1.97124	13.6532	2.13367	0	7.5092	0.147976	5.08682	0	0	8.59192	3.27458	1.17664	0.237225	2.10793	0		18.9241	28.6655	320.646	0.702819	13.4678	896.572	28.933	3.9118	0.1	0.1	0.1
FC	1102.98	n/a	123.88	113.467	0.778758	10.4126	0	0	0	0.768879	10.4027	0.00987913	0.00987913	0	0	0	0	0	0	0	0	54.2132	1.98471	13.7468	2.13483	0	7.44057	0.146998	4.84286	0	0	8.64694	3.29708	1.18473	0.238856	2.12243	0		18.9241	28.6655	322.842	0.702819	13.4678	902.723	29.1313	3.9118	0.1	0.1	0.1
FC	1092.98	n/a	123.881	109.74	3.72811	14.1407	0	0	0	0	10.4012	3.72965	3.73953	0	0	0	0	0	0	0	0	54.3542	2.01238	14.073	2.13572	0	7.47166	0.151995	4.4739	0	0	8.25823	3.40249	1.22497	0.246968	2.19451	0		18.9241	28.6655	332.104	0.702819	13.4678	933.356	30.0576	3.9118	0.1	0.1	0.1
FC	1082.98	n/a	123.894	105.609	4.14431	18.285	0	0	0	0	10.4012	3.66108	7.40061	0.483233	0.483233	0	0	0	0	0	0	54.7614	1.97144	14.4484	2.08328	0	7.27435	0.157941	4.08238	0	0	7.88248	3.52843	1.27289	0.25663	2.28036	0		18.9241	28.6655	343.251	0.702819	13.4678	969.938	31.1672	3.9118	0.1	0.1	0.1
FC	1072.98	n/a	123.928	100.571	5.07241	23.3574	0	0	0	0	10.4012	3.65534	11.0559	1.41708	1.90031	0	0	0	0	0	0	55.7124	1.79653	14.9357	1.91598	0	6.60024	0.165853	3.63838	0	0	7.53695	3.69722	1.33665	0.269485	2.39459	0		18.9241	28.6655	358.395	0.702819	13.4678	1018.79	32.6586	3.9118	0.1	0.1	0.1
FC	1062.98	n/a	123.955	96.5066	4.09122	27.4487	0	0	0	0	10.4012	3.0012	14.0571	1.09002	2.99033	0	0	0	0	0	0	56.5344	1.64951	15.359	1.77091	0	6.02678	0.172837	3.25682	0	0	7.21472	3.84574	1.39295	0.280835	2.49544	0		18.9241	28.6655	371.571	0.702819	13.4678	1061.92	33.9682	3.9118	0.1	0.1	0.1
FC	1052.98	n/a	123.977	93.1348	3.39335	30.842	0	0	0	0	10.4012	2.52856	16.5857	0.864795	3.85512	0	0	0	0	0	0	57.2588	1.52264	15.7318	1.6432	0	5.52956	0.179095	2.92393	0	0	6.91241	3.97834	1.44338	0.291002	2.58578	0		18.9241	28.6655	383.201	0.702819	13.4678	1100.55	35.1352	3.9118	0.1	0.1	0.1
FC	1042.98	n/a	123.994	90.2785	2.87394	33.716	0	0	0	0	10.4012	2.17208	18.7578	0.701866	4.55699	0	0	0	0	0	0	57.9064	1.41087	16.0634	1.5295	0	5.09241	0.184761	2.63035	0	0	6.62746	4.09799	1.48904	0.300209	2.66759	0		18.9241	28.6655	393.575	0.702819	13.4678	1135.51	36.1864	3.9118	0.1	0.1	0.1
FC	1032.98	n/a	124.009	87.8194	2.47382	36.1898	0	0	0	0	10.4012	1.89442	20.6522	0.579403	5.13639	0	0	0	0	0	0	58.4919	1.31072	16.3603	1.42744	0	4.70407	0.189935	2.36933	0	0	6.35784	4.20685	1.53074	0.308615	2.74229	0		18.9241	28.6655	402.899	0.702819	13.4678	1167.43	37.1408	3.9118	0.1	0.1	0.1
FC	1022.98	n/a	124.022	85.6399	2.19205	38.3818	0	0	0	0	10.4012	1.66393	22.3161	0.488682	5.62507	0.0394419	0.0394419	0	0	0	0	59.031	1.21969	16.6204	1.33526	0	4.35614	0.194768	2.13762	0	0	6.10021	4.30666	1.56965	0.316469	2.81208	0		18.9241	28.6655	410.794	0.702819	13.4678	1196.98	38.0262	3.9118	0.1	0.1	0.1
FC	1012.98	n/a	124.036	82.0516	3.60284	41.9847	0	0	0	0	10.4012	1.05471	23.3708	0.606365	6.23144	1.94176	1.98121	0	0	0	0	59.7779	1.13872	16.5055	1.25131	0	4.03064	0.203286	2.01619	0	0	5.7734	4.40193	1.63577	0.330309	2.93506	0		18.9241	28.6655	392.221	0.702819	13.4678	1236.07	39.5096	3.9118	0.1	0.1	0.1
FC	1002.98	n/a	124.049	78.825	3.23892	45.2236	0	0	0	0	10.4012	0.89152	24.2624	0.52437	6.75581	1.82303	3.80423	0	0	0	0	60.4776	1.06539	16.379	1.1738	0	3.73338	0.211608	1.90754	0	0	5.46604	4.48654	1.70008	0.34383	3.0552	0		18.9241	28.6655	373.773	0.702819	13.4678	1273.3	40.9441	3.9118	0.1	0.1	0.1
FC	992.976	n/a	124.059	75.8989	2.93651	48.1601	0	0	0	0	10.4012	0.759187	25.0215	0.457238	7.21305	1.72009	5.52432	0	0	0	0	61.1353	0.998687	16.2428	1.10196	0	3.46076	0.219765	1.81001	0	0	5.17663	4.56118	1.76283	0.357085	3.17299	0		18.9241	28.6655	355.556	0.702819	13.4678	1308.91	42.3362	3.9118	0.1	0.1	0.1
FC	982.976	n/a	124.068	73.1853	2.72251	50.8826	0	0	0	0	10.4012	0.600298	25.6218	0.399399	7.61245	1.67511	7.19943	0.0477075	0.0477075	0	0	61.7559	0.939643	16.091	1.03537	0	3.20927	0.227914	1.71647	0	0	4.91175	4.62657	1.82516	0.370326	3.29064	0		18.9241	28.6655	337.11	0.702819	13.4678	1343.44	43.7139	3.9118	0.1	0.1	0.1
FC	972.976	n/a	124.074	70.3929	2.79865	53.6813	0	0	0	0	10.4012	0.147122	25.769	0.336841	7.94929	1.9255	9.12493	0.389189	0.436897	0	0	62.349	0.89983	15.874	0.974424	0	2.97156	0.236955	1.5889	0	0	4.72196	4.68342	1.8937	0.385016	3.42117	0		18.9241	28.6655	315.173	0.702819	13.4678	1379.52	45.2381	3.9118	0.1	0.1	0.1
FC	962.976	n/a	124.078	67.7866	2.61031	56.2916	0	0	0	0	10.4012	0.0810806	25.85	0.225823	8.17511	1.86361	10.9885	0.381895	0.818792	0.0579043	0.0579043	62.9094	0.841642	15.6399	0.926023	0	2.77939	0.245202	1.46768	0	0	4.54427	4.73162	1.96235	0.39982	3.55271	0		18.9241	28.6655	293.57	0.702819	13.4678	1414.68	46.7573	3.9118	0.1	0.1	0.1
FC	952.976	n/a	124.081	65.3551	2.43403	58.7256	0	0	0	0	10.4012	0.0316752	25.8817	0.151802	8.32691	1.79118	12.7797	0.368755	1.18755	0.0906171	0.148521	63.4416	0.772744	15.393	0.886553	0	2.61933	0.252865	1.35329	0	0	4.37833	4.77177	2.03093	0.414694	3.68489	0		18.9241	28.6655	272.682	0.702819	13.4678	1448.97	48.2677	3.9118	0.1	0.1	0.1
FC	942.976	n/a	124.083	63.1074	2.24999	60.9756	0	0	0	0	10.4012	0.0117468	25.8935	0.13638	8.46329	1.68741	14.4671	0.33545	1.523	0.0790012	0.227523	63.9512	0.710001	15.1431	0.848461	0	2.46721	0.260503	1.24867	0	0	4.22192	4.80473	2.09865	0.429465	3.81613	0		18.9241	28.6655	253.115	0.702819	13.4678	1482.28	49.7528	3.9118	0.1	0.1	0.1
[truncated: 89 more columns]

## Sheet: Traces_1_OUTPUT
	MODE	Magma Temperature (°C)	Wallrock Temperature (°C)	Recharge Magma Temperature (°C) (T of recharge magma when recharge event occurs)	Total Magma Chamber Mass (grams )	Magma Liquid Mass (grams)	Magma: Total Incremental Mass of Crystals (Cumulates) removed as Cumulates (grams)	Magma: Total Cumulative Mass of Crystals (Cumulates) removed as Cumulates (grams)	Magma: Incremental Fluid Phase Mass	Magma: Cumulative Fluid Phase Mass	Magma: Mass Fraction of H2O in Incremental Fluid Phase	Total Recharge Magma Mass Added to Magma (grams)	Recharge Liquid Mass (grams)	Recharge Magma Total Mass of Crystals (grams)	Total Recharge Magma Fluid Phase Mass (grams)	Recharge: Mass Fraction of H2O in Incremental Fluid Phase	Wallrock Subsystem Mass (grams)	Wallrock Subsystem Residual Liquid Mass	Wallrock Subsystem Solid (Crystal) Mass	Wallrock Subsystem Residual Fluid Mass	Incremental WR Liquid Added to Magma (grams)	Cumulative WR LIquid Added to Magma (grams)	Wallrock: Mass Fraction of H2O in Incremental Fluid Phase	Magma Melt SiO2 (wt. %)	Magma Melt TiO2 (wt. %)	Magma Melt Al2O3 (wt. %)	Magma Melt Fe2O3 (wt. %)	Magma Melt Cr2O3 (wt. %)	Magma Melt FeO (wt. %)	Magma Melt MnO (wt. %)	Magma Melt MgO (wt. %)	Magma Melt NiO (wt. %)	Magma Melt CoO (wt. %)	Magma Melt CaO (wt. %)	Magma Melt Na2O (wt. %)	Magma Melt K2O (wt. %)	Magma Melt P2O5 (wt. %)	Magma Melt H2O (wt. %)	Magma Melt CO2 (wt. %)	Nd conc in melt, magma chamber	Nd conc in inst olivine {1}	Nd conc in inst clinopyroxene {1}	Nd conc in inst spinel {1}	Nd conc in inst feldspar {1}	Nd conc in inst orthopyroxene {1}	Nd conc in inst rhm-oxide {1}
Initial		1234.57				100											0																							0
Step 1	FC	1234.57	n/a		98.9509	98.9509																		49.1187	2.17995	11.8893	2.41281		9.52162	0.17739	9.91643			9.4468	2.31018	0.737246	0.238913	2.05075		0
Step 2	FC	1224.57	n/a		98.95	98.1157	0.834235	0.834235																49.1947	2.19851	11.9905	2.42351		9.50274	0.177152	9.60592			9.52448	2.32984	0.743522	0.240947	2.06821		0	0
Step 3	FC	1214.57	n/a		98.9487	97.1375	0.97694	1.81117																49.2863	2.22065	12.1112	2.43469		9.47764	0.176815	9.23887			9.6171	2.3533	0.75101	0.243373	2.08904		0	0
Step 4	FC	1204.57	n/a		98.9474	96.1946	0.941681	2.75286																49.3771	2.24242	12.2299	2.44553		9.44909	0.176432	8.88138			9.70811	2.37637	0.758372	0.245759	2.10952		0	0
Step 5	FC	1194.57	n/a		98.9462	95.2852	0.908101	3.66096																49.4672	2.26382	12.3466	2.45601		9.4171	0.176002	8.53332			9.79752	2.39905	0.765609	0.248104	2.12965		0	0
Step 6	FC	1184.57	n/a		98.945	94.4079	0.876123	4.53708																49.5565	2.28485	12.4614	2.46616		9.3817	0.175527	8.1946			9.88536	2.42134	0.772724	0.25041	2.14944		0	0
Step 7	FC	1174.57	n/a		98.9438	93.5611	0.845674	5.38275																49.6451	2.30554	12.5742	2.47598		9.34292	0.175007	7.86507			9.97167	2.44326	0.779718	0.252676	2.16889		0	0
Step 8	FC	1164.57	n/a		98.9427	92.7432	0.816696	6.19945																49.733	2.32587	12.6851	2.48545		9.30075	0.174442	7.54462			10.0565	2.46481	0.786594	0.254904	2.18802		0	0
Step 9	FC	1154.57	n/a		98.9416	91.953	0.789134	6.98858																49.8203	2.34586	12.7941	2.4946		9.25521	0.173833	7.2331			10.1398	2.48599	0.793354	0.257095	2.20683		0	0
Step 10	FC	1144.57	n/a		98.9405	91.1889	0.76294	7.75152																49.9069	2.36551	12.9013	2.50341		9.20631	0.173181	6.93038			10.2216	2.50682	0.800001	0.259249	2.22532		0	0
Step 11	RFC			1200	98.9405	116.189						25	24.9409																											0
Step 12	RFC	1152.98	n/a		123.883	116.133		7.75																53.8664	1.93923	13.4315	2.11441		7.67147	0.150129	5.68301			8.4578	3.22141	1.15754	0.233373	2.07371		0
Step 13	FC	1142.98	n/a		123.884	116.134		7.75																53.8659	1.93921	13.4314	2.12317		7.6635	0.150128	5.68296			8.45773	3.22138	1.15753	0.233371	2.07369		0
Step 14	FC	1132.98	n/a		123.885	115.872	0.2621	8.0121																53.8987	1.9436	13.4617	2.13022		7.63895	0.149854	5.59972			8.4761	3.22866	1.16014	0.233899	2.07837		0	0
Step 15	FC	1122.98	n/a		123.883	115.046	0.824667	8.83677																54.0048	1.95755	13.5584	2.13213		7.57541	0.148933	5.33894			8.53461	3.25185	1.16847	0.235578	2.0933		0	0
Step 16	FC	1112.98	n/a		123.881	114.248	0.797082	9.63385																54.1096	1.97124	13.6532	2.13367		7.5092	0.147976	5.08682			8.59192	3.27458	1.17664	0.237225	2.10793		0	0
Step 17	FC	1102.98	n/a		123.88	113.467	0.778758	10.4126																54.2132	1.98471	13.7468	2.13483		7.44057	0.146998	4.84286			8.64694	3.29708	1.18473	0.238856	2.12243		0	0	0
Step 18	FC	1092.98	n/a		123.881	109.74	3.72811	14.1407																54.3542	2.01238	14.073	2.13572		7.47166	0.151995	4.4739			8.25823	3.40249	1.22497	0.246968	2.19451		0		0
Step 19	FC	1082.98	n/a		123.894	105.609	4.14431	18.285																54.7614	1.97144	14.4484	2.08328		7.27435	0.157941	4.08238			7.88248	3.52843	1.27289	0.25663	2.28036		0		0	0
Step 20	FC	1072.98	n/a		123.928	100.571	5.07241	23.3574																55.7124	1.79653	14.9357	1.91598		6.60024	0.165853	3.63838			7.53695	3.69722	1.33665	0.269485	2.39459		0		0	0
Step 21	FC	1062.98	n/a		123.955	96.5066	4.09122	27.4487																56.5344	1.64951	15.359	1.77091		6.02678	0.172837	3.25682			7.21472	3.84574	1.39295	0.280835	2.49544		0		0	0
Step 22	FC	1052.98	n/a		123.977	93.1348	3.39335	30.842																57.2588	1.52264	15.7318	1.6432		5.52956	0.179095	2.92393			6.91241	3.97834	1.44338	0.291002	2.58578		0		0	0
Step 23	FC	1042.98	n/a		123.994	90.2785	2.87394	33.716																57.9064	1.41087	16.0634	1.5295		5.09241	0.184761	2.63035			6.62746	4.09799	1.48904	0.300209	2.66759		0		0	0
Step 24	FC	1032.98	n/a		124.009	87.8194	2.47382	36.1898																58.4919	1.31072	16.3603	1.42744		4.70407	0.189935	2.36933			6.35784	4.20685	1.53074	0.308615	2.74229		0		0	0
Step 25	FC	1022.98	n/a		124.022	85.6399	2.19205	38.3818																59.031	1.21969	16.6204	1.33526		4.35614	0.194768	2.13762			6.10021	4.30666	1.56965	0.316469	2.81208		0		0	0	0
Step 26	FC	1012.98	n/a		124.036	82.0516	3.60284	41.9847																59.7779	1.13872	16.5055	1.25131		4.03064	0.203286	2.01619			5.7734	4.40193	1.63577	0.330309	2.93506		0		0	0	0
Step 27	FC	1002.98	n/a		124.049	78.825	3.23892	45.2236																60.4776	1.06539	16.379	1.1738		3.73338	0.211608	1.90754			5.46604	4.48654	1.70008	0.34383	3.0552		0		0	0	0
Step 28	FC	992.976	n/a		124.059	75.8989	2.93651	48.1601																61.1353	0.998687	16.2428	1.10196		3.46076	0.219765	1.81001			5.17663	4.56118	1.76283	0.357085	3.17299		0		0	0	0
Step 29	FC	982.976	n/a		124.068	73.1853	2.72251	50.8826																61.7559	0.939643	16.091	1.03537		3.20927	0.227914	1.71647			4.91175	4.62657	1.82516	0.370326	3.29064		0		0	0	0	0
Step 30	FC	972.976	n/a		124.074	70.3929	2.79865	53.6813																62.349	0.89983	15.874	0.974424		2.97156	0.236955	1.5889			4.72196	4.68342	1.8937	0.385016	3.42117		0		0	0	0	0
Step 31	FC	962.976	n/a		124.078	67.7866	2.61031	56.2916																62.9094	0.841642	15.6399	0.926023		2.77939	0.245202	1.46768			4.54427	4.73162	1.96235	0.39982	3.55271		0		0	0	0	0	0
Step 32	FC	952.976	n/a		124.081	65.3551	2.43403	58.7256																63.4416	0.772744	15.393	0.886553		2.61933	0.252865	1.35329			4.37833	4.77177	2.03093	0.414694	3.68489		0		0	0	0	0	0
Step 33	FC	942.976	n/a		124.083	63.1074	2.24999	60.9756																63.9512	0.710001	15.1431	0.848461		2.46721	0.260503	1.24867			4.22192	4.80473	2.09865	0.429465	3.81613		0		0	0	0	0	0
Step 34	0
Step 35	0
Step 36	0
Step 37	0
Step 38	0
Step 39	0
Step 40	0
Step 41	0
Step 42	0
Step 43	0
Step 44	0
Step 45	0
Step 46	0
Step 47	0
Step 48	0
Step 49	0
Step 50	0
Step 51	0
Step 52	0
Step 53	0
Step 54	0
Step 55	0
Step 56	0
Step 57	0
Step 58	0
Step 59	0
Step 60	0
Step 61	0
Step 62	0
Step 63	0
Step 64	0
Step 65	0
Step 66	0
Step 67	0
Step 68	0
Step 69	0
Step 70	0
Step 71	0
Step 72	0
Step 73	0
Step 74	0
Step 75	0
Step 76	0
Step 77	0
Step 78	0
Step 79	0
Step 80	0
Step 81	0
Step 82	0
Step 83	0
Step 84	0
Step 85	0
Step 86	0
Step 87	0
Step 88	0
Step 89	0
Step 90	0
Step 91	0
Step 92	0
Step 93	0
Step 94	0
Step 95	0
Step 96	0
Step 97	0
Step 98	0
Step 99	0
Step 100	0
Step 101	0
Step 102	0
Step 103	0
Step 104	0
Step 105	0
Step 106	0
Step 107	0
Step 108	0
Step 109	0
Step 110	0
Step 111	0
Step 112	0
Step 113	0
Step 114	0
Step 115	0
Step 116	0
Step 117	0
Step 118	0
Step 119	0
Step 120	0
Step 121	0
Step 122	0
Step 123	0
Step 124	0
Step 125	0
Step 126	0
Step 127	0
Step 128	0
Step 129	0
Step 130	0
Step 131	0
Step 132	0
Step 133	0
Step 134	0
Step 135	0
Step 136	0
Step 137	0
Step 138	0
Step 139	0
Step 140	0
Step 141	0
Step 142	0
Step 143	0
Step 144	0
Step 145	0
Step 146	0
Step 147	0
Step 148	0
Step 149	0
Step 150	0
Step 151	0
Step 152	0
Step 153	0
Step 154	0
Step 155	0
Step 156	0
Step 157	0
Step 158	0
Step 159	0
Step 160	0
Step 161	0
Step 162	0
Step 163	0
Step 164	0
Step 165	0
Step 166	0
Step 167	0
Step 168	0
Step 169	0
Step 170	0
Step 171	0
Step 172	0
Step 173	0
Step 174	0
Step 175	0
Step 176	0
Step 177	0
Step 178	0
Step 179	0
Step 180	0
Step 181	0
Step 182	0
Step 183	0
Step 184	0
Step 185	0
Step 186	0
Step 187	0
Step 188	0
Step 189	0
Step 190	0
Step 191	0
Step 192	0
Step 193	0
Step 194	0
Step 195	0
Step 196	0
Step 197	0
Step 198	0
Step 199	0
Step 200	0
Step 201	0
Step 202	0
Step 203	0
Step 204	0
Step 205	0
Step 206	0
Step 207	0
Step 208	0
Step 209	0
Step 210	0
Step 211	0
Step 212	0
Step 213	0
Step 214	0
Step 215	0
Step 216	0
Step 217	0
Step 218	0
Step 219	0
Step 220	0
Step 221	0
Step 222	0
Step 223	0
Step 224	0
Step 225	0
Step 226	0
Step 227	0
Step 228	0
Step 229	0
Step 230	0
Step 231	0
Step 232	0
Step 233	0
Step 234	0
Step 235	0
Step 236	0
Step 237	0
Step 238	0
Step 239	0
Step 240	0
Step 241	0
Step 242	0
Step 243	0
Step 244	0
Step 245	0
Step 246	0
Step 247	0
Step 248	0
Step 249	0
Step 250	0
Step 251	0
Step 252	0
Step 253	0
Step 254	0
Step 255	0
Step 256	0
Step 257	0
Step 258	0
Step 259	0
Step 260	0
Step 261	0
Step 262	0
Step 263	0
Step 264	0
Step 265	0
Step 266	0
Step 267	0
Step 268	0
Step 269	0
Step 270	0
Step 271	0
Step 272	0
Step 273	0
Step 274	0
Step 275	0
Step 276	0
Step 277	0
Step 278	0
Step 279	0
Step 280	0
Step 281	0
Step 282	0
Step 283	0
Step 284	0
Step 285	0
Step 286	0
Step 287	0
Step 288	0
Step 289	0
Step 290	0
Step 291	0
Step 292	0
Step 293	0
Step 294	0
Step 295	0
Step 296	0
Step 297	0
Step 298	0
Step 299	0
Step 300	0
Step 301	0
Step 302	0
Step 303	0
Step 304	0
Step 305	0
Step 306	0
Step 307	0
Step 308	0
Step 309	0
Step 310	0
Step 311	0
Step 312	0
Step 313	0
Step 314	0
Step 315	0
Step 316	0
Step 317	0
Step 318	0
Step 319	0
Step 320	0
Step 321	0
Step 322	0
Step 323	0
Step 324	0
Step 325	0
Step 326	0
Step 327	0
Step 328	0
Step 329	0
Step 330	0
Step 331	0
Step 332	0
Step 333	0
Step 334	0
Step 335	0
Step 336	0
Step 337	0
Step 338	0
Step 339	0
Step 340	0
Step 341	0
Step 342	0
Step 343	0
Step 344	0
Step 345	0
Step 346	0
Step 347	0
Step 348	0
Step 349	0
Step 350	0
Step 351	0
Step 352	0
Step 353	0
Step 354	0
Step 355	0
Step 356	0
Step 357	0
Step 358	0
Step 359	0
Step 360	0
Step 361	0
Step 362	0
Step 363	0
Step 364	0
Step 365	0
Step 366	0
Step 367	0
Step 368	0
Step 369	0
Step 370	0
Step 371	0
Step 372	0
Step 373	0
Step 374	0
Step 375	0
Step 376	0
Step 377	0
Step 378	0
Step 379	0
Step 380	0
Step 381	0
Step 382	0
Step 383	0
Step 384	0
Step 385	0
Step 386	0
Step 387	0
Step 388	0
Step 389	0
Step 390	0
Step 391	0
Step 392	0
Step 393	0
Step 394	0
Step 395	0
Step 396	0
Step 397	0
Step 398	0
Step 399	0

## Sheet: Input
EXECUTABLES	MCS_PhaseEQ_PC.xlsm
Melts Executable Family	rhyolite-MELTS+H2O-CO2 fluid (v1.1.0); Melts-batch-v1.1.0;
Magma EXE Release	rhyolite-MELTS (1.0.2, 1.1.0, 1.2.0) pMELTS (5.6.1) - (Feb 25 2020 - 19:48:48)
Wallrock EXE Release
Recharge EXE Release	rhyolite-MELTS (1.0.2, 1.1.0, 1.2.0) pMELTS (5.6.1) - (Feb 25 2020 - 19:48:48)
SYSTEM VARIABLES	Values in column B, and the 'do not edit' names in column D, must be kept matched on a single row.	Copied from E:\MCS_PC\INPUT & OUTPUT\MES_R2FC_MME_input -6-25.xlsx on the creation of this Archive, at 2021/3/3 19:55:00			Input values reprinted with (memory) variable values as MCS starts.
FmZero (wallrock) (fraction)	0.1		FmZero		Minimum Wallrock (WR)melt mass fraction to trigger addition of anatectic melt from WR to M (Magma) subsystem. Final state of WR after addition will be WR melt fraction equal to fmzero. Based on rheological studies, fmzero may typically lie in range 0.01 to 0.15. fmzero=0.05 is a 'nice' value.
Excluded Phases			ExclusionsGlobal		Using the MCS interface, click "Help for Excluded Phase", click on phases you wish to exclude, press put in clipboard, and paste in this row (col. B). The phases excluded will be excluded in all three subsystems WR, M and R.
System Pressure (in bars)	1000		SystemPressure		Pressure in bars. This is a global parameter that is constant and applies to M, WR and R subsystems.
Enthalpy Convergence steps	30		EnthConvergenceSteps		During Assimilation (A) and Recharge R steps in a MCS simulation, thermodynamic isenthalpic calculations are performed. During this calculation, the system enthalpy, rather than tempertureis being stepped from an initial to final state. The value enthered here in EnthConvergenceSteps controls the discretization. This value should be a positive nonzero interger. A operation range is circa 5-100. A…
Oxygen Fugacity	nno		SystemfO2		Acceptable input values are: none, fmq, coh, nno, iw, hm. These are standard oxygen buffers. When choosing 'none' be sure to input reasonable values for ferric iron oxide and ferrous iron oxide into all compositions used as input. For many applications setting 'none' and then making ferrous iron oxide 80 to 85% of the total iron oxide (FeOT) is suggested.
M Composition (wt%)					Oxide total should be normalized to sum to 100 prior to input for M and in the following sections for WR and Recharge R. User can either normalize to 100 on their own and then enter into column B or enter a composition in column F. The column F input is then auto normalized in column G. Then column G should be cut and pasted into column B (using paste special-->values)
SiO2	48.6034		MagmaElementValue1			Composition Normalized to 100
TiO2	2.15708		MagmaElementValue2
Al2O3	11.7645		MagmaElementValue3
Fe2O3	12.8583		MagmaElementValue4
Cr2O3	0		MagmaElementValue5
FeO	0		MagmaElementValue6
MnO	0.175529		MagmaElementValue7
MgO	9.8124		MagmaElementValue8
NiO	0		MagmaElementValue9
CoO	0		MagmaElementValue10
CaO	9.3477		MagmaElementValue11
Na2O	2.28594		MagmaElementValue12
K2O	0.729512		MagmaElementValue13
P2O5	0.236407		MagmaElementValue14
H2O	2.02924		MagmaElementValue15
CO2	0		MagmaElementValue16
SO3	n/a
Cl2O-1	n/a
F2O-1	n/a
Temperature start (°C)	1250		Tstart		Magma "Find Liquidus" operation begins at this Tstart. Once a liquidus temperature is established, the MCS simulation commences.
Temperature decrement (°C)	10		Tincrement		Positive number reflecting temperature decrement for the cooling magma body (M) . Numbers <1 are can be unstable and should not be explored. A 'nice' value is in the range 5-20 oC. For crude explorations 30-50 oCis good. Generally valuesin the range 2- 30 degree C are suggested
Hard Stop Melt Mass in Magma	0		MagmaHardStopMinimumLiqMass		Ignored if zero, otherwise MCS stops when the M liquid mass drops below this threshold.
Hard Stop Temperature	950		MagmaHardStopTemperature		Ignored if zero, otherwise MCS stopswhen the M temperature reaches this value. Useful especially if doing a M "fractional crystallization only" simulation. Otherwise keep at 0.
WR Composition (wt%)						Composition Normalized to 100
SiO2	48.6034		WallrockElementValue1
TiO2	2.15708		WallrockElementValue2
Al2O3	11.7645		WallrockElementValue3
Fe2O3	12.8583		WallrockElementValue4
Cr2O3	0		WallrockElementValue5
FeO	0		WallrockElementValue6
MnO	0.175529		WallrockElementValue7
MgO	9.8124		WallrockElementValue8
NiO	0		WallrockElementValue9
CoO	0		WallrockElementValue10
CaO	9.3477		WallrockElementValue11
Na2O	2.28594		WallrockElementValue12
K2O	0.729512		WallrockElementValue13
P2O5	0.236407		WallrockElementValue14
H2O	2.02924		WallrockElementValue15
CO2	0		WallrockElementValue16
SO3	n/a
Cl2O-1	n/a
F2O-1	n/a
INITIAL WALLROCK TEMPERATURE AND MASS
Wallrock find solidus: end temperature (°C)	0		WallrockPrelimTEnd		Ending temperature of the WR "Find Solidus" operation. This temperature should be set to ~10 degrees below the solidus of the WR composition. If set too low, the phase equilibria engine may not be able to return a solution. Try to keep this value slightly below but close to the solidus of Wallrock. Standalone MELTS calcultion done on WR composition in equilibrium crystallization mode can help use…
Wallrock find solidus: temperature (°C) decrement	0		WallrockPrelimTIncrement		Positive number reflecting temperature decrements for the WR "Find Solidus" operation.
Wallrock find solidus: start temperature (°C)	0		WallrockPrelimTStart		Starting temperature for WR Find Solidus operation.Find wallrock solidus operation does not need to start above the WR liquidus although choosing a too low value can interfere with a MCS simulation.
Initial Wallrock Solid Mass (grams)	0		WallrockSolidMass		All MCS simulations are hardwired to start with 100 grams of M magma. The number provided by user here sets the mass of WR that thermally interacts with M magma. So, e.g., if WR=100 in column B, then during MCS simulation, heat extracted from M is added to 100 grams of WR. If entry is 150, then the heat derived by cooling and crystallization of M will be added to 150 grams of WR etc.
Wallrock Initial Temperature (°C)	0		WallrockTemperature		Starting temperature of the WR upon initiation of the MCS
RECHARGE General
Recharge Trigger Mode (byTemp OR byTempSerial OR byDelta)	byTemp		RechargeTriggerMode		Acceptable values are: byTemp or byTempSerial or byDelta (case insensitive). When set byTemp, recharge addition occurs when the Magma T attains the value set here. When set byTempSerial, recharge addition N+1 will occur only after recharge addition N has completed, regardless of the threshold Magma T specified for recharge addition N+1. When set byDelta, recharge addition occurs when the Magma T …
RECHARGE EVENT 1 (wt. %)						Composition Normalized to 100
SiO2	68.1865		Recharge1ElementValue1
TiO2	0.380032		Recharge1ElementValue2
Al2O3	15.3357		Recharge1ElementValue3
Fe2O3	2.97456		Recharge1ElementValue4
Cr2O3	0		Recharge1ElementValue5
FeO	0		Recharge1ElementValue6
MnO	0.065697		Recharge1ElementValue7
MgO	1.11786		Recharge1ElementValue8
NiO	0		Recharge1ElementValue9
CoO	0		Recharge1ElementValue10
CaO	2.00528		Recharge1ElementValue11
Na2O	5.82076		Recharge1ElementValue12
K2O	2.45909		Recharge1ElementValue13
P2O5	0.138469		Recharge1ElementValue14
H2O	1.51609		Recharge1ElementValue15
CO2	0		Recharge1ElementValue16
SO3	n/a
Cl2O-1	n/a
F2O-1	n/a
RECHARGE EVENT 1: TEMPERATURES AND MASS
Recharge EVENT 1: Mass (grams)	25		Recharge1Mass		Value set here is the mass of Recharge added during Recharge event 1. Note that MCS ALWAYS begins with 100g of M magma. Hence if entry here >100 there will be proportionately more Recharge1 mass than starting Magma, and vice versa. If set to 0, no recharge will occur.
Recharge EVENT 1: R Magma Temperature (°C)	1200		Recharge1Temperature		The temperature of Recharge1's magma at the onset of recharge into the Magma. This is pre-addition T of the Recharge magma. The internal thermodynamic state of Recharge is computed before addition to M is available in Output (RunSummary)
Recharge EVENT 1: when byTemp or byTempSerial: Temp (°C) of M magma at recharge instant	1150		Recharge1TriggerTemperature		Temperature of Magma subsystem when Recharge magma will be added. Ignored when TriggerMode is set to byDelta.
Recharge EVENT 1: when byDelta: delta Temp (°C) of M magma at recharge instant	0		Recharge1DeltaTriggerTemperature		Temperature decrement (set as positive number) from Magma liquidus temperature at which the Recharge magma will be added. Ignored when TriggerMode is set to byTemp.
RECHARGE EVENT 2: OXIDES (wt. %)						Composition Normalized to 100
SiO2	49.3843		Recharge2ElementValue1
TiO2	1.73364		Recharge2ElementValue2
Al2O3	13.7908		Recharge2ElementValue3
Fe2O3	1.83178		Recharge2ElementValue4
Cr2O3	0		Recharge2ElementValue5
FeO	8.73392		Recharge2ElementValue6
MnO	0.176302		Recharge2ElementValue7
MgO	7.81607		Recharge2ElementValue8
NiO	0		Recharge2ElementValue9
CoO	0		Recharge2ElementValue10
CaO	12.0865		Recharge2ElementValue11
Na2O	2.11563		Recharge2ElementValue12
K2O	0.225275		Recharge2ElementValue13
P2O5	0.146919		Recharge2ElementValue14
H2O	1.95892		Recharge2ElementValue15
CO2	0		Recharge2ElementValue16
SO3	n/a
Cl2O-1	n/a
F2O-1	n/a
RECHARGE EVENT 2: TEMPERATURES AND MASS
Recharge EVENT 2: Mass (grams)	0		Recharge2Mass		If >0 then Recharge2 will occur if conditions are met. If >100 there will be proportionately more Recharge2 mass than Magma, and vice versa. (SEE INFO on RECHARGE EVENT1 for details)
Recharge EVENT 2: R Magma Temperature (°C)	0		Recharge2Temperature		The temperature at which Recharge2's magma body is equilibrated prior to addition to Magma (SEE INFO on RECHARGE EVENT1 for details)
Recharge EVENT 2: when byTemp or byTempSerial: Temp (°C) of M magma at recharge instant	0		Recharge2TriggerTemperature		ignored when byDelta (SEE INFO on RECHARGE EVENT1 for details)
Recharge EVENT 2: when byDelta: delta Temp (°C) of M magma at recharge instant	0		Recharge2DeltaTriggerTemperature		ignored when byTemp (SEE INFO on RECHARGE EVENT1 for details)
RECHARGE EVENT 3: OXIDES (wt. %)						Composition Normalized to 100
SiO2	0		Recharge3ElementValue1
TiO2	0		Recharge3ElementValue2
Al2O3	0		Recharge3ElementValue3
Fe2O3	0		Recharge3ElementValue4
Cr2O3	0		Recharge3ElementValue5
FeO	0		Recharge3ElementValue6
MnO	0		Recharge3ElementValue7
MgO	0		Recharge3ElementValue8
NiO	0		Recharge3ElementValue9
CoO	0		Recharge3ElementValue10
CaO	0		Recharge3ElementValue11
Na2O	0		Recharge3ElementValue12
K2O	0		Recharge3ElementValue13
P2O5	0		Recharge3ElementValue14
H2O	0		Recharge3ElementValue15
CO2	0		Recharge3ElementValue16
SO3	n/a
Cl2O-1	n/a
F2O-1	n/a
RECHARGE EVENT 3: TEMPERATURES AND MASS
Recharge EVENT 3: Mass (grams)	0		Recharge3Mass		If >0 then Recharge3 will occur if conditions are met. If >100 there will be proportionately more Recharge3 mass than Magma, and vice versa. (SEE INFO on RECHARGE EVENT1 for details)
Recharge EVENT 3: R Magma Temperature (°C)	0		Recharge3Temperature		The temperature at which Recharge3's magma body is equilibrated prior to addition to Magma (SEE INFO on RECHARGE EVENT1 for details)
Recharge EVENT 3: when byTemp or byTempSerial: Temp (°C) of M magma at recharge instant	0		Recharge3TriggerTemperature		ignored when byDelta (SEE INFO on RECHARGE EVENT1 for details)
Recharge EVENT 3: when byDelta: delta Temp (°C) of M magma at recharge instant	0		Recharge3DeltaTriggerTemperature		ignored when byTemp (SEE INFO on RECHARGE EVENT1 for details)
RECHARGE EVENT 4: OXIDES (wt. %)						Composition Normalized to 100
SiO2	0		Recharge4ElementValue1
TiO2	0		Recharge4ElementValue2
Al2O3	0		Recharge4ElementValue3
Fe2O3	0		Recharge4ElementValue4
Cr2O3	0		Recharge4ElementValue5
FeO	0		Recharge4ElementValue6
MnO	0		Recharge4ElementValue7
MgO	0		Recharge4ElementValue8
NiO	0		Recharge4ElementValue9
CoO	0		Recharge4ElementValue10
CaO	0		Recharge4ElementValue11
Na2O	0		Recharge4ElementValue12
K2O	0		Recharge4ElementValue13
P2O5	0		Recharge4ElementValue14
H2O	0		Recharge4ElementValue15
CO2	0		Recharge4ElementValue16
SO3	n/a
Cl2O-1	n/a
F2O-1	n/a
Recharge EVENT 4: TEMPERATURES AND MASS
Recharge EVENT 4: Mass (grams)	0		Recharge4Mass		If >0 then Recharge4 will occur if conditions are met. If >100 there will be proportionately more Recharge4 mass than Magma, and vice versa. (SEE INFO on RECHARGE EVENT1 for details)
Recharge EVENT 4: R Magma Temperature (°C)	0		Recharge4Temperature		The temperature at which Recharge4's magma body is equilibrated prior to addition to Magma (SEE INFO on RECHARGE EVENT1 for details)
Recharge EVENT 4: when byTemp or byTempSerial: Temp (°C) of M magma at recharge instant	0		Recharge4TriggerTemperature		ignored when byDelta (SEE INFO on RECHARGE EVENT1 for details)
Recharge EVENT 4: when byDelta: delta Temp (°C) of M magma at recharge instant	0		Recharge4DeltaTriggerTemperature		ignored when byTemp (SEE INFO on RECHARGE EVENT1 for details)
RECHARGE EVENT 5: OXIDES (wt. %)						Composition Normalized to 100
SiO2	0		Recharge5ElementValue1
TiO2	0		Recharge5ElementValue2
Al2O3	0		Recharge5ElementValue3
Fe2O3	0		Recharge5ElementValue4
Cr2O3	0		Recharge5ElementValue5
FeO	0		Recharge5ElementValue6
MnO	0		Recharge5ElementValue7
MgO	0		Recharge5ElementValue8
NiO	0		Recharge5ElementValue9
CoO	0		Recharge5ElementValue10
CaO	0		Recharge5ElementValue11
Na2O	0		Recharge5ElementValue12
K2O	0		Recharge5ElementValue13
P2O5	0		Recharge5ElementValue14
H2O	0		Recharge5ElementValue15
CO2	0		Recharge5ElementValue16
SO3	n/a
Cl2O-1	n/a
F2O-1	n/a
RECHARGE EVENT 5: TEMPERATURES AND MASS
RECHARGE EVENT 5: Mass (grams)	0		Recharge5Mass		If >0 then Recharge5 will occur if conditions are met. If >100 there will be proportionately more Recharge5 mass than Magma, and vice versa. (SEE INFO on RECHARGE EVENT1 for details)
Recharge EVENT 5: R Magma Temperature (°C)	0		Recharge5Temperature		The temperature at which Recharge5's magma body is equilibrated prior to addition to Magma (SEE INFO on RECHARGE EVENT1 for details)
Recharge EVENT 5: when byTemp or byTempSerial: Temp (°C) of M magma at recharge instant	0		Recharge5TriggerTemperature		ignored when byDelta (SEE INFO on RECHARGE EVENT1 for details)
Recharge EVENT 5: when byDelta: delta Temp (°C) of M magma at recharge instant	0		Recharge5DeltaTriggerTemperature		ignored when byTemp (SEE INFO on RECHARGE EVENT1 for details)
GRAPHING
Graph 0 X axis	Wallrock/Temperature		Graph0XAxis		fixed by system for WR. Don't change.
Graph 0 Y axis	Wallrock/LiquidPercent		Graph0YAxis		fixed by system for WR. Don't change.
Graph 1 X axis	Magma/MgO		Graph1XAxis
Graph 1 Y axis	Magma/SiO2		Graph1YAxis		All X-Y pairs 1 thru 30 must say "Magma/" followed by one of the oxides (case sensitive) for both X and Y axes. Up to 30 graphs may be obtained. Only single oxides allowed. If you want a TAS diagram you must build your own. An easy way to do this is in CHARTDATA tab of RESULTS sheet with the user define file name.
Graph 2 X axis	Magma/MgO		Graph2XAxis
Graph 2 Y axis	Magma/TiO2		Graph2YAxis
Graph 3 X axis	Magma/MgO		Graph3XAxis
Graph 3 Y axis	Magma/Al2O3		Graph3YAxis
Graph 4 X axis	Magma/MgO		Graph4XAxis
Graph 4 Y axis	Magma/FeO		Graph4YAxis
Graph 5 X axis	Magma/MgO		Graph5XAxis
Graph 5 Y axis	Magma/Fe2O3		Graph5YAxis
Graph 6 X axis	Magma/MgO		Graph6XAxis
Graph 6 Y axis	Magma/MnO		Graph6YAxis
Graph 7 X axis	Magma/MgO		Graph7XAxis
Graph 7 Y axis	Magma/CaO		Graph7YAxis
Graph 8 X axis	Magma/MgO		Graph8XAxis
Graph 8 Y axis	Magma/Na2O		Graph8YAxis
Graph 9 X axis	Magma/MgO		Graph9XAxis
Graph 9 Y axis	Magma/K2O		Graph9YAxis
Graph 10 X axis	Magma/MgO		Graph10XAxis
Graph 10 Y axis	Magma/P2O5		Graph10YAxis
Graph 11 X axis			Graph11XAxis
Graph 11 Y axis			Graph11YAxis
Graph 12 X axis			Graph12XAxis
Graph 12 Y axis			Graph12YAxis
Graph 13 X axis			Graph13XAxis
Graph 13 Y axis			Graph13YAxis
Graph 14 X axis			Graph14XAxis
Graph 14 Y axis			Graph14YAxis
Graph 15 X axis			Graph15XAxis
Graph 15 Y axis			Graph15YAxis
Graph 16 X axis			Graph16XAxis
Graph 16 Y axis			Graph16YAxis
Graph 17 X axis			Graph17XAxis
Graph 17 Y axis			Graph17YAxis
Graph 18 X axis			Graph18XAxis
Graph 18 Y axis			Graph18YAxis
Graph 19 X axis			Graph19XAxis
Graph 19 Y axis			Graph19YAxis
Graph 20 X axis			Graph20XAxis
Graph 20 Y axis			Graph20YAxis
Graph 21 X axis			Graph21XAxis
Graph 21 Y axis			Graph21YAxis
Graph 22 X axis			Graph22XAxis
Graph 22 Y axis			Graph22YAxis
Graph 23 X axis			Graph23XAxis
Graph 23 Y axis			Graph23YAxis
Graph 24 X axis			Graph24XAxis
Graph 24 Y axis			Graph24YAxis
Graph 25 X axis			Graph25XAxis
Graph 25 Y axis			Graph25YAxis
Graph 26 X axis			Graph26XAxis
Graph 26 Y axis			Graph26YAxis
Graph 27 X axis			Graph27XAxis
Graph 27 Y axis			Graph27YAxis
Graph 28 X axis			Graph28XAxis
Graph 28 Y axis			Graph28YAxis
Graph 29 X axis			Graph29XAxis
Graph 29 Y axis			Graph29YAxis
Graph 30 X axis			Graph30XAxis
Graph 30 Y axis			Graph30YAxis
EXECUTABLES					The entries in the four cells immediately below are written back here at run time.
Melts Executable Family	Set at run time
Magma EXE Release	Read back from Melts
Wallrock EXE Release	Read back from Melts
Recharge EXE Release	Read back from Melts

## Sheet: RunSummary
	Melts Run Mode	Magma Chamber Process	Magma Temperature (°C)	Wallrock Temperature (°C)	Recharge Magma Temperature (°C) (T of recharge magma when recharge event occurs)	Total Magma Chamber Mass (grams )	Magma Liquid Mass (grams)	Magma: Total Incremental Mass of Crystals (Cumulates) removed as Cumulates (grams)	Magma: Total Cumulative Mass of Crystals (Cumulates) removed as Cumulates (grams)	Magma: Incremental Fluid Phase Mass	Magma: Cumulative Fluid Phase Mass	Magma: Mass Fraction of H2O in Incremental Fluid Phase	Total Recharge Magma Mass Added to Magma (grams)	Recharge Liquid Mass (grams)	Recharge Magma Total Mass of Crystals (grams)	Total Recharge Magma Fluid Phase Mass (grams)	Recharge: Mass Fraction of H2O in Incremental Fluid Phase	Wallrock Subsystem Mass (grams)	Wallrock Subsystem Residual Liquid Mass	Wallrock Subsystem Solid (Crystal) Mass	Wallrock Subsystem Residual Fluid Mass	Incremental WR Liquid Added to Magma (grams)	Cumulative WR LIquid Added to Magma (grams)	Wallrock: Mass Fraction of H2O in Incremental Fluid Phase	Magma Mineral olivine {1} : Incremental Mass (grams) Removed in this Temperature Step	Magma olivine {1} : Total Mass (grams) Removed across all Temperature Steps	Magma Mineral clinopyroxene {1} : Incremental Mass (grams) Removed in this Temperature Step	Magma clinopyroxene {1} : Total Mass (grams) Removed across all Temperature Steps	Magma Mineral spinel {1} : Incremental Mass (grams) Removed in this Temperature Step	Magma spinel {1} : Total Mass (grams) Removed across all Temperature Steps	Magma Mineral feldspar {1} : Incremental Mass (grams) Removed in this Temperature Step	Magma feldspar {1} : Total Mass (grams) Removed across all Temperature Steps	Magma Mineral orthopyroxene {1} : Incremental Mass (grams) Removed in this Temperature Step	Magma orthopyroxene {1} : Total Mass (grams) Removed across all Temperature Steps	Magma Mineral rhm-oxide {1} : Incremental Mass (grams) Removed in this Temperature Step	Magma rhm-oxide {1} : Total Mass (grams) Removed across all Temperature Steps	Magma Melt SiO2 (wt. %)	Magma Melt TiO2 (wt. %)	Magma Melt Al2O3 (wt. %)	Magma Melt Fe2O3 (wt. %)	Magma Melt Cr2O3 (wt. %)	Magma Melt FeO (wt. %)	Magma Melt MnO (wt. %)	Magma Melt MgO (wt. %)	Magma Melt NiO (wt. %)	Magma Melt CoO (wt. %)	Magma Melt CaO (wt. %)	Magma Melt Na2O (wt. %)	Magma Melt K2O (wt. %)
Numbers this row; System use only.																											0.0022387		0.00217029		0.00271056		0.00219082		0.00142795
	NO WR INFO TRACKED IN FC OR RFC ONLY MCS					100
4	MagmaFindLiquidus	M LIQUIDUS T	1234.57	n/a		100	98.9509		0	0	0																										49.1187	2.17995	11.8893	2.41281	0	9.52162	0.17739	9.91643	0	0	9.4468	2.31018	0.737246
5	MagmaEquilibrateB	FC	1234.57	n/a		98.9509	98.9509		0	0	0																										49.1187	2.17995	11.8893	2.41281	0	9.52162	0.17739	9.91643	0	0	9.4468	2.31018	0.737246
7	MagmaEquilibrateB	FC	1224.57	n/a		98.95	98.1157	0.834235	0.834235	0	0														0.834235	0.834235											49.1947	2.19851	11.9905	2.42351	0	9.50274	0.177152	9.60592	0	0	9.52448	2.32984	0.743522
9	MagmaEquilibrateB	FC	1214.57	n/a		98.9487	97.1375	0.97694	1.81117	0	0														0.97694	1.81117											49.2863	2.22065	12.1112	2.43469	0	9.47764	0.176815	9.23887	0	0	9.6171	2.3533	0.75101
11	MagmaEquilibrateB	FC	1204.57	n/a		98.9474	96.1946	0.941681	2.75286	0	0														0.941681	2.75286											49.3771	2.24242	12.2299	2.44553	0	9.44909	0.176432	8.88138	0	0	9.70811	2.37637	0.758372
13	MagmaEquilibrateB	FC	1194.57	n/a		98.9462	95.2852	0.908101	3.66096	0	0														0.908101	3.66096											49.4672	2.26382	12.3466	2.45601	0	9.4171	0.176002	8.53332	0	0	9.79752	2.39905	0.765609
15	MagmaEquilibrateB	FC	1184.57	n/a		98.945	94.4079	0.876123	4.53708	0	0														0.876123	4.53708											49.5565	2.28485	12.4614	2.46616	0	9.3817	0.175527	8.1946	0	0	9.88536	2.42134	0.772724
17	MagmaEquilibrateB	FC	1174.57	n/a		98.9438	93.5611	0.845674	5.38275	0	0														0.845674	5.38275											49.6451	2.30554	12.5742	2.47598	0	9.34292	0.175007	7.86507	0	0	9.97167	2.44326	0.779718
19	MagmaEquilibrateB	FC	1164.57	n/a		98.9427	92.7432	0.816696	6.19945	0	0														0.816696	6.19945											49.733	2.32587	12.6851	2.48545	0	9.30075	0.174442	7.54462	0	0	10.0565	2.46481	0.786594
21	MagmaEquilibrateB	FC	1154.57	n/a		98.9416	91.953	0.789134	6.98858	0	0														0.789134	6.98858											49.8203	2.34586	12.7941	2.4946	0	9.25521	0.173833	7.2331	0	0	10.1398	2.48599	0.793354
23	MagmaEquilibrateB	FC	1144.57	n/a		98.9405	91.1889	0.76294	7.75152	0	0														0.76294	7.75152											49.9069	2.36551	12.9013	2.50341	0	9.20631	0.173181	6.93038	0	0	10.2216	2.50682	0.800001
24	RechargeEquilibrate	RFC			1200	98.9405							25	24.9409		0
26	MagmaEquilibrateC	RFC	1152.98	n/a		123.883	116.133	-0.00151967	7.75	0	0														-0.00151967	7.75											53.8664	1.93923	13.4315	2.11441	0	7.67147	0.150129	5.68301	0	0	8.4578	3.22141	1.15754
28	MagmaEquilibrateB	FC	1142.98	n/a		123.884	116.134	0	7.75	0	0															7.75											53.8659	1.93921	13.4314	2.12317	0	7.6635	0.150128	5.68296	0	0	8.45773	3.22138	1.15753
30	MagmaEquilibrateB	FC	1132.98	n/a		123.885	115.872	0.2621	8.0121	0	0														0.2621	8.0121											53.8987	1.9436	13.4617	2.13022	0	7.63895	0.149854	5.59972	0	0	8.4761	3.22866	1.16014
32	MagmaEquilibrateB	FC	1122.98	n/a		123.883	115.046	0.824667	8.83677	0	0														0.824667	8.83677											54.0048	1.95755	13.5584	2.13213	0	7.57541	0.148933	5.33894	0	0	8.53461	3.25185	1.16847
34	MagmaEquilibrateB	FC	1112.98	n/a		123.881	114.248	0.797082	9.63385	0	0														0.797082	9.63385											54.1096	1.97124	13.6532	2.13367	0	7.5092	0.147976	5.08682	0	0	8.59192	3.27458	1.17664
36	MagmaEquilibrateB	FC	1102.98	n/a		123.88	113.467	0.778758	10.4126	0	0														0.768879	10.4027	0.00987913	0.00987913									54.2132	1.98471	13.7468	2.13483	0	7.44057	0.146998	4.84286	0	0	8.64694	3.29708	1.18473
38	MagmaEquilibrateB	FC	1092.98	n/a		123.881	109.74	3.72811	14.1407	0	0														-0.00154197	10.4012	3.72965	3.73953									54.3542	2.01238	14.073	2.13572	0	7.47166	0.151995	4.4739	0	0	8.25823	3.40249	1.22497
40	MagmaEquilibrateB	FC	1082.98	n/a		123.894	105.609	4.14431	18.285	0	0															10.4012	3.66108	7.40061	0.483233	0.483233							54.7614	1.97144	14.4484	2.08328	0	7.27435	0.157941	4.08238	0	0	7.88248	3.52843	1.27289
42	MagmaEquilibrateB	FC	1072.98	n/a		123.928	100.571	5.07241	23.3574	0	0															10.4012	3.65534	11.0559	1.41708	1.90031							55.7124	1.79653	14.9357	1.91598	0	6.60024	0.165853	3.63838	0	0	7.53695	3.69722	1.33665
44	MagmaEquilibrateB	FC	1062.98	n/a		123.955	96.5066	4.09122	27.4487	0	0															10.4012	3.0012	14.0571	1.09002	2.99033							56.5344	1.64951	15.359	1.77091	0	6.02678	0.172837	3.25682	0	0	7.21472	3.84574	1.39295
46	MagmaEquilibrateB	FC	1052.98	n/a		123.977	93.1348	3.39335	30.842	0	0															10.4012	2.52856	16.5857	0.864795	3.85512							57.2588	1.52264	15.7318	1.6432	0	5.52956	0.179095	2.92393	0	0	6.91241	3.97834	1.44338
48	MagmaEquilibrateB	FC	1042.98	n/a		123.994	90.2785	2.87394	33.716	0	0															10.4012	2.17208	18.7578	0.701866	4.55699							57.9064	1.41087	16.0634	1.5295	0	5.09241	0.184761	2.63035	0	0	6.62746	4.09799	1.48904
50	MagmaEquilibrateB	FC	1032.98	n/a		124.009	87.8194	2.47382	36.1898	0	0															10.4012	1.89442	20.6522	0.579403	5.13639							58.4919	1.31072	16.3603	1.42744	0	4.70407	0.189935	2.36933	0	0	6.35784	4.20685	1.53074
52	MagmaEquilibrateB	FC	1022.98	n/a		124.022	85.6399	2.19205	38.3818	0	0															10.4012	1.66393	22.3161	0.488682	5.62507	0.0394419	0.0394419					59.031	1.21969	16.6204	1.33526	0	4.35614	0.194768	2.13762	0	0	6.10021	4.30666	1.56965
54	MagmaEquilibrateB	FC	1012.98	n/a		124.036	82.0516	3.60284	41.9847	0	0															10.4012	1.05471	23.3708	0.606365	6.23144	1.94176	1.98121					59.7779	1.13872	16.5055	1.25131	0	4.03064	0.203286	2.01619	0	0	5.7734	4.40193	1.63577
56	MagmaEquilibrateB	FC	1002.98	n/a		124.049	78.825	3.23892	45.2236	0	0															10.4012	0.89152	24.2624	0.52437	6.75581	1.82303	3.80423					60.4776	1.06539	16.379	1.1738	0	3.73338	0.211608	1.90754	0	0	5.46604	4.48654	1.70008
58	MagmaEquilibrateB	FC	992.976	n/a		124.059	75.8989	2.93651	48.1601	0	0															10.4012	0.759187	25.0215	0.457238	7.21305	1.72009	5.52432					61.1353	0.998687	16.2428	1.10196	0	3.46076	0.219765	1.81001	0	0	5.17663	4.56118	1.76283
60	MagmaEquilibrateB	FC	982.976	n/a		124.068	73.1853	2.72251	50.8826	0	0															10.4012	0.600298	25.6218	0.399399	7.61245	1.67511	7.19943	0.0477075	0.0477075			61.7559	0.939643	16.091	1.03537	0	3.20927	0.227914	1.71647	0	0	4.91175	4.62657	1.82516
62	MagmaEquilibrateB	FC	972.976	n/a		124.074	70.3929	2.79865	53.6813	0	0															10.4012	0.147122	25.769	0.336841	7.94929	1.9255	9.12493	0.389189	0.436897			62.349	0.89983	15.874	0.974424	0	2.97156	0.236955	1.5889	0	0	4.72196	4.68342	1.8937
64	MagmaEquilibrateB	FC	962.976	n/a		124.078	67.7866	2.61031	56.2916	0	0															10.4012	0.0810806	25.85	0.225823	8.17511	1.86361	10.9885	0.381895	0.818792	0.0579043	0.0579043	62.9094	0.841642	15.6399	0.926023	0	2.77939	0.245202	1.46768	0	0	4.54427	4.73162	1.96235
66	MagmaEquilibrateB	FC	952.976	n/a		124.081	65.3551	2.43403	58.7256	0	0															10.4012	0.0316752	25.8817	0.151802	8.32691	1.79118	12.7797	0.368755	1.18755	0.0906171	0.148521	63.4416	0.772744	15.393	0.886553	0	2.61933	0.252865	1.35329	0	0	4.37833	4.77177	2.03093
68	MagmaEquilibrateB	FC	942.976	n/a		124.083	63.1074	2.24999	60.9756	0	0															10.4012	0.0117468	25.8935	0.13638	8.46329	1.68741	14.4671	0.33545	1.523	0.0790012	0.227523	63.9512	0.710001	15.1431	0.848461	0	2.46721	0.260503	1.24867	0	0	4.22192	4.80473	2.09865
[truncated: 36 more columns]

## Sheet: SolidFormulas
Run	Temp	Solid.Name	Formula	Si	Ti	Al	Fe	Fe''	Fe'''	Cr	Mg	Mn	Ni	Co	Ca	Na	K	P	H	C	O	OH	Unexpected			SiO2	TiO2	Al2O3	Fe2O3	Cr2O3	FeO	MnO	MgO	NiO	CoO	CaO	Na2O	K2O	P2O5	H2O	CO2
MagmaEquilibrateB	1224.57	olivine	(Ca0.00Mg0.86Fe''0.13Mn0.00Co0.00Ni0.00)2SiO4	1				0.26			1.72	0	0.002	0	0						4			Ca=0;Mg=1.72;Fe''=0.26;Mn=0;Co=0;Ni=0.002;Si=1;O=4		40.2305					12.7948	0.205636	46.4472			0.321967
MagmaEquilibrateB	1214.57	olivine	(Ca0.00Mg0.86Fe''0.14Mn0.00Co0.00Ni0.00)2SiO4	1				0.28			1.72	0	0.002	0	0						4			Ca=0;Mg=1.72;Fe''=0.28;Mn=0;Co=0;Ni=0.002;Si=1;O=4		40.1542					13.1927	0.210854	46.1145			0.327685
MagmaEquilibrateB	1204.57	olivine	(Ca0.00Mg0.86Fe''0.14Mn0.00Co0.00Ni0.00)2SiO4	1				0.28			1.72	0	0.002	0	0						4			Ca=0;Mg=1.72;Fe''=0.28;Mn=0;Co=0;Ni=0.002;Si=1;O=4		40.0753					13.6044	0.216221	45.7706			0.333457
MagmaEquilibrateB	1194.57	olivine	(Ca0.00Mg0.85Fe''0.15Mn0.00Co0.00Ni0.00)2SiO4	1				0.3			1.7	0	0.002	0	0						4			Ca=0;Mg=1.7;Fe''=0.3;Mn=0;Co=0;Ni=0.002;Si=1;O=4		39.9937					14.0307	0.221747	45.4146			0.339286
MagmaEquilibrateB	1184.57	olivine	(Ca0.00Mg0.85Fe''0.15Mn0.00Co0.00Ni0.00)2SiO4	1				0.3			1.7	0	0.002	0	0						4			Ca=0;Mg=1.7;Fe''=0.3;Mn=0;Co=0;Ni=0.002;Si=1;O=4		39.9091					14.4724	0.227438	45.0458			0.345178
MagmaEquilibrateB	1174.57	olivine	(Ca0.00Mg0.84Fe''0.16Mn0.00Co0.00Ni0.00)2SiO4	1				0.32			1.68	0	0.002	0	0						4			Ca=0;Mg=1.68;Fe''=0.32;Mn=0;Co=0;Ni=0.002;Si=1;O=4		39.8214					14.9305	0.233306	44.6636			0.351144
MagmaEquilibrateB	1164.57	olivine	(Ca0.00Mg0.84Fe''0.16Mn0.00Co0.00Ni0.00)2SiO4	1				0.32			1.68	0	0.002	0	0						4			Ca=0;Mg=1.68;Fe''=0.32;Mn=0;Co=0;Ni=0.002;Si=1;O=4		39.7305					15.406	0.239359	44.267			0.357194
MagmaEquilibrateB	1154.57	olivine	(Ca0.00Mg0.83Fe''0.17Mn0.00Co0.00Ni0.00)2SiO4	1				0.34			1.66	0	0.002	0	0						4			Ca=0;Mg=1.66;Fe''=0.34;Mn=0;Co=0;Ni=0.002;Si=1;O=4		39.636					15.8998	0.245608	43.8552			0.363341
MagmaEquilibrateB	1144.57	olivine	(Ca0.01Mg0.82Fe''0.17Mn0.00Co0.00Ni0.00)2SiO4	1				0.34			1.64	0	0.002	0	0.02						4			Ca=0.02;Mg=1.64;Fe''=0.34;Mn=0;Co=0;Ni=0.002;Si=1;O=4		39.5378					16.4133	0.252065	43.4273			0.369601
MagmaEquilibrateB	1132.98	olivine	(Ca0.00Mg0.81Fe''0.19Mn0.00Co0.00Ni0.00)2SiO4	1				0.38			1.62	0	0.002	0	0						4			Ca=0;Mg=1.62;Fe''=0.38;Mn=0;Co=0;Ni=0.002;Si=1;O=4		39.3145					17.6142	0.271035	42.4759			0.324289
MagmaEquilibrateB	1122.98	olivine	(Ca0.00Mg0.80Fe''0.19Mn0.00Co0.00Ni0.00)2SiO4	1				0.38			1.6	0	0.002	0	0						4			Ca=0;Mg=1.6;Fe''=0.38;Mn=0;Co=0;Ni=0.002;Si=1;O=4		39.2033					18.1963	0.278563	41.9916			0.330213
MagmaEquilibrateB	1112.98	olivine	(Ca0.00Mg0.80Fe''0.20Mn0.00Co0.00Ni0.00)2SiO4	1				0.4			1.6	0	0.002	0	0						4			Ca=0;Mg=1.6;Fe''=0.4;Mn=0;Co=0;Ni=0.002;Si=1;O=4		39.0873					18.8035	0.286366	41.4866			0.336301
MagmaEquilibrateB	1102.98	olivine	(Ca0.00Mg0.79Fe''0.21Mn0.00Co0.00Ni0.00)2SiO4	1				0.42			1.58	0	0.002	0	0						4			Ca=0;Mg=1.58;Fe''=0.42;Mn=0;Co=0;Ni=0.002;Si=1;O=4		38.9661					19.4382	0.294489	40.9587			0.342527
MagmaEquilibrateB	1102.98	clinopyroxene	cpx Na0.01Ca0.79Fe''0.19Mg0.89Fe'''0.06Ti0.03Al0.17Si1.86O6																							50.5141	0.99561	3.85437	2.23827		6.04431		16.1046			20.0689	0.179954
MagmaEquilibrateB	1092.98	clinopyroxene	cpx Na0.01Ca0.80Fe''0.19Mg0.87Fe'''0.07Ti0.03Al0.18Si1.85O6																							50.0451	1.16882	4.13701	2.40104		6.26379		15.7128			20.0781	0.19333
MagmaEquilibrateB	1082.98	clinopyroxene	cpx Na0.01Ca0.80Fe''0.20Mg0.85Fe'''0.07Ti0.04Al0.19Si1.84O6																							49.5921	1.34093	4.41977	2.54522		6.42347		15.313			20.1587	0.206888
MagmaEquilibrateB	1082.98	spinel	Fe''1.01Mg0.41Fe'''0.96Al0.20Cr0.00Ti0.42O4																								15.9938	4.79938	36.6708		34.7313		7.80471
MagmaEquilibrateB	1072.98	clinopyroxene	cpx Na0.02Ca0.81Fe''0.20Mg0.83Fe'''0.07Ti0.04Al0.20Si1.83O6																							49.3081	1.43959	4.64112	2.60193		6.44025		14.9804			20.3699	0.218663
MagmaEquilibrateB	1072.98	spinel	Fe''1.03Mg0.39Fe'''0.97Al0.20Cr0.00Ti0.41O4																								15.7086	4.80427	36.988		35.1156		7.38352
MagmaEquilibrateB	1062.98	clinopyroxene	cpx Na0.02Ca0.82Fe''0.20Mg0.81Fe'''0.07Ti0.04Al0.21Si1.82O6																							49.0146	1.549	4.86974	2.6575		6.45342		14.6562			20.5683	0.231185
MagmaEquilibrateB	1062.98	spinel	Fe''1.04Mg0.37Fe'''0.99Al0.20Cr0.00Ti0.41O4																								15.4507	4.80475	37.2762		35.4719		6.99638
MagmaEquilibrateB	1052.98	clinopyroxene	cpx Na0.02Ca0.83Fe''0.20Mg0.80Fe'''0.08Ti0.05Al0.22Si1.81O6																							48.7069	1.67104	5.10794	2.7134		6.46488		14.3357			20.7557	0.244434
MagmaEquilibrateB	1052.98	spinel	Fe''1.05Mg0.35Fe'''1.00Al0.20Cr0.00Ti0.40O4																								15.2095	4.8009	37.5509		35.8047		6.63407
MagmaEquilibrateB	1042.98	clinopyroxene	cpx Na0.02Ca0.84Fe''0.20Mg0.78Fe'''0.08Ti0.05Al0.24Si1.80O6																							48.3797	1.80816	5.35831	2.77087		6.47602		14.0153			20.9331	0.258405
MagmaEquilibrateB	1042.98	spinel	Fe''1.07Mg0.33Fe'''1.01Al0.20Cr0.00Ti0.40O4																								14.9773	4.79313	37.8229		36.1159		6.29077
MagmaEquilibrateB	1032.98	clinopyroxene	cpx Na0.02Ca0.84Fe''0.20Mg0.76Fe'''0.08Ti0.06Al0.25Si1.79O6																							48.0272	1.96371	5.624	2.83113		6.48781		13.6916			21.1014	0.273094
MagmaEquilibrateB	1032.98	spinel	Fe''1.08Mg0.31Fe'''1.02Al0.20Cr0.00Ti0.39O4																								14.7479	4.78201	38.1015		36.406		5.9626
MagmaEquilibrateB	1022.98	clinopyroxene	cpx Na0.02Ca0.85Fe''0.20Mg0.74Fe'''0.08Ti0.06Al0.26Si1.78O6																							47.6549	2.1369	5.89959	2.89153		6.50217		13.3701			21.2565	0.288321
MagmaEquilibrateB	1022.98	feldspar	K0.01Na0.31Ca0.68Al1.68Si2.32O8	2.32		1.68									0.68	0.31	0.01				8			K=0.01;Na=0.31;Ca=0.68;Al=1.68;Si=2.32;O=8		51.0269		31.3505								13.9581	3.56514	0.0993387
MagmaEquilibrateB	1022.98	spinel	Fe''1.09Mg0.30Fe'''1.03Al0.20Cr0.00Ti0.39O4																								14.5227	4.765	38.3877		36.6739		5.65061
MagmaEquilibrateB	1012.98	clinopyroxene	cpx Na0.02Ca0.85Fe''0.21Mg0.75Fe'''0.08Ti0.06Al0.25Si1.79O6																							47.9484	2.04049	5.69945	2.75202		6.58204		13.5335			21.1492	0.294923
MagmaEquilibrateB	1012.98	feldspar	K0.01Na0.33Ca0.66Al1.66Si2.34O8	2.34		1.66									0.66	0.33	0.01				8			K=0.01;Na=0.33;Ca=0.66;Al=1.66;Si=2.34;O=8		51.4842		31.0409								13.5959	3.77237	0.106673
MagmaEquilibrateB	1012.98	spinel	Fe''1.10Mg0.29Fe'''1.03Al0.19Cr0.00Ti0.39O4																								14.6256	4.5921	38.3336		36.9074		5.54139
MagmaEquilibrateB	1002.98	clinopyroxene	cpx Na0.02Ca0.84Fe''0.21Mg0.76Fe'''0.07Ti0.05Al0.24Si1.80O6																							48.2409	1.94462	5.50027	2.61475		6.66178		13.7037			21.0326	0.301343
MagmaEquilibrateB	1002.98	feldspar	K0.01Na0.35Ca0.64Al1.64Si2.36O8	2.36		1.64									0.64	0.35	0.01				8			K=0.01;Na=0.35;Ca=0.64;Al=1.64;Si=2.36;O=8		51.9542		30.7225								13.2236	3.9851	0.114593
MagmaEquilibrateB	1002.98	spinel	Fe''1.11Mg0.29Fe'''1.03Al0.19Cr0.00Ti0.39O4																								14.724	4.4281	38.2819		37.1256		5.44037
MagmaEquilibrateB	992.976	clinopyroxene	cpx Na0.02Ca0.83Fe''0.21Mg0.77Fe'''0.07Ti0.05Al0.23Si1.81O6																							48.5333	1.84888	5.30129	2.47956		6.74323		13.8821			20.9041	0.307513
MagmaEquilibrateB	992.976	feldspar	K0.01Na0.37Ca0.62Al1.62Si2.38O8	2.38		1.62									0.62	0.37	0.01				8			K=0.01;Na=0.37;Ca=0.62;Al=1.62;Si=2.38;O=8		52.4348		30.3969								12.8428	4.20241	0.123135
MagmaEquilibrateB	992.976	spinel	Fe''1.11Mg0.28Fe'''1.03Al0.18Cr0.00Ti0.40O4																								14.8195	4.27178	38.231		37.3307		5.34702
MagmaEquilibrateB	982.976	orthopyroxene	opx Na0.00Ca0.06Fe''0.48Mg1.40Fe'''0.02Ti0.00Al0.09Si1.94O6																							53.5668	0.145989	2.05662	0.807921		15.9407		25.837			1.62137	0.0236218
MagmaEquilibrateB	982.976	clinopyroxene	cpx Na0.02Ca0.83Fe''0.21Mg0.78Fe'''0.07Ti0.05Al0.22Si1.82O6																							48.792	1.77021	5.12011	2.35642		6.81746		14.0396			20.7904	0.313829
MagmaEquilibrateB	982.976	feldspar	K0.01Na0.39Ca0.60Al1.60Si2.40O8	2.4		1.6									0.6	0.39	0.01				8			K=0.01;Na=0.39;Ca=0.6;Al=1.6;Si=2.4;O=8		52.9143		30.0718								12.4627	4.41887	0.132257
MagmaEquilibrateB	982.976	spinel	Fe''1.12Mg0.28Fe'''1.03Al0.17Cr0.00Ti0.40O4																								14.9265	4.11285	38.1589		37.5517		5.25002
MagmaEquilibrateB	972.976	orthopyroxene	opx Na0.00Ca0.06Fe''0.49Mg1.39Fe'''0.02Ti0.00Al0.09Si1.94O6																							53.5736	0.14021	1.98969	0.772202		16.1807		25.7172			1.60268	0.0237011
MagmaEquilibrateB	972.976	clinopyroxene	cpx Na0.02Ca0.83Fe''0.21Mg0.78Fe'''0.06Ti0.05Al0.22Si1.82O6																							48.7752	1.83285	5.08729	2.31415		6.80174		13.9608			20.9041	0.323918
MagmaEquilibrateB	972.976	feldspar	K0.01Na0.40Ca0.59Al1.59Si2.41O8	2.41		1.59									0.59	0.4	0.01				8			K=0.01;Na=0.4;Ca=0.59;Al=1.59;Si=2.41;O=8		53.3205		29.7962								12.1405	4.60142	0.141332
MagmaEquilibrateB	972.976	spinel	Fe''1.14Mg0.27Fe'''1.02Al0.16Cr0.00Ti0.41O4																								15.1454	3.89118	37.9045		37.9802		5.07865
MagmaEquilibrateB	962.976	orthopyroxene	opx Na0.00Ca0.06Fe''0.50Mg1.38Fe'''0.02Ti0.00Al0.08Si1.95O6																							53.5566	0.130297	1.92251	0.741166		16.512		25.5246			1.58913	0.0237165
MagmaEquilibrateB	962.976	clinopyroxene	cpx Na0.02Ca0.84Fe''0.21Mg0.77Fe'''0.06Ti0.05Al0.22Si1.82O6																							48.8596	1.81604	4.99065	2.2653		6.85397		13.9078			20.9745	0.332098
MagmaEquilibrateB	962.976	feldspar	K0.01Na0.42Ca0.57Al1.57Si2.43O8	2.43		1.57									0.57	0.42	0.01				8			K=0.01;Na=0.42;Ca=0.57;Al=1.57;Si=2.43;O=8		53.7125		29.53								11.8295	4.77695	0.151146
MagmaEquilibrateB	962.976	spinel	Fe''1.15Mg0.26Fe'''1.03Al0.16Cr0.00Ti0.41O4																								15.0538	3.70367	38.1675		38.245		4.82999
MagmaEquilibrateB	962.976	rhm-oxide	Mn0.02Fe''0.57Mg0.24Fe'''0.23Al0.11Ti0.83O3																								46.5125	4.10297	12.8874		28.6942	1.01169	6.79125
MagmaEquilibrateB	952.976	orthopyroxene	opx Na0.00Ca0.06Fe''0.51Mg1.37Fe'''0.02Ti0.00Al0.08Si1.95O6																							53.5187	0.118011	1.85665	0.71395		16.917		25.2737			1.57824	0.0236725
MagmaEquilibrateB	952.976	clinopyroxene	cpx Na0.02Ca0.84Fe''0.22Mg0.77Fe'''0.06Ti0.05Al0.21Si1.83O6																							49.0212	1.73845	4.84512	2.2112		6.95814		13.8731			21.0142	0.338627
MagmaEquilibrateB	952.976	feldspar	K0.01Na0.43Ca0.56Al1.56Si2.44O8	2.44		1.56									0.56	0.43	0.01				8			K=0.01;Na=0.43;Ca=0.56;Al=1.56;Si=2.44;O=8		54.0932		29.2712								11.5271	4.94688	0.161671
MagmaEquilibrateB	952.976	spinel	Fe''1.16Mg0.24Fe'''1.05Al0.15Cr0.00Ti0.40O4																								14.7233	3.54294	38.8346		38.3653		4.53387
MagmaEquilibrateB	952.976	rhm-oxide	Mn0.02Fe''0.58Mg0.23Fe'''0.23Al0.11Ti0.83O3																								46.5317	3.95358	12.8571		28.998	1.05197	6.60761
MagmaEquilibrateB	942.976	orthopyroxene	opx Na0.00Ca0.06Fe''0.53Mg1.36Fe'''0.02Ti0.00Al0.08Si1.95O6																							53.4778	0.106901	1.79375	0.687609		17.3224		25.0233			1.56459	0.0236
MagmaEquilibrateB	942.976	clinopyroxene	cpx Na0.02Ca0.84Fe''0.22Mg0.77Fe'''0.06Ti0.05Al0.21Si1.83O6																							49.1759	1.6659	4.70424	2.15744		7.05857		13.837			21.0557	0.345213
MagmaEquilibrateB	942.976	feldspar	K0.01Na0.45Ca0.54Al1.54Si2.46O8	2.46		1.54									0.54	0.45	0.01				8			K=0.01;Na=0.45;Ca=0.54;Al=1.54;Si=2.46;O=8		54.4739		29.0122								11.2247	5.11643	0.172789
MagmaEquilibrateB	942.976	spinel	Fe''1.16Mg0.23Fe'''1.07Al0.14Cr0.00Ti0.39O4																								14.4003	3.39091	39.4887		38.4605		4.25955
MagmaEquilibrateB	942.976	rhm-oxide	Mn0.02Fe''0.58Mg0.23Fe'''0.23Al0.11Ti0.83O3																								46.5555	3.80904	12.8176		29.2966	1.09176	6.4295

## Sheet: XTASChartData
x	y	x	y	x	y	x	y	x	y	x	y	x	y	x	y	SiO2	Alk
A		B		C		D		E		F		G		H		I
XTASChartData!$A$4:$A$15	XTASChartData!$B$4:$B$15	XTASChartData!$C$4:$C$5	XTASChartData!$D$4:$D$5	XTASChartData!$E$4:$E$5	XTASChartData!$F$4:$F$5	XTASChartData!$G$4:$G$9	XTASChartData!$H$4:$H$9	XTASChartData!$I$4:$I$7	XTASChartData!$J$4:$J$7	XTASChartData!$K$4:$K$7	XTASChartData!$L$4:$L$7	XTASChartData!$M$4:$M$7	XTASChartData!$N$4:$N$7	XTASChartData!$O$4:$O$5	XTASChartData!$P$4:$P$5
41	0.5	57.6	11.7	41	3	45	5	45	9.4	48.4	11.5	52.4	14	69	8
41	3	61	13.5	45	3	52	5	49.4	7.3	53	9.3	57.6	11.7	69	14
41	7					57	5.9	52	5	57	5.9	63	7
45	9.4					63	7	52	0.5	57	0.5	63	0.5
48.4	11.5					69	8
52.4	14					77.5	0.5
57.6	11.7
53	9.3
49.4	7.3
45	5
45	3
45	0.5
Left	Top	height	width	Name	Caption
63	22.6	630	900	Chart 1	aaaaa
554	469	18	65	TextBox 28	Andesite
324	532	18	60		Basalt
447	495	36	60		Basaltic andesite
420	350	48	60	TextBox 23	Basaltic Trachy- andesite
270	350	18	60	TextBox 20	Basanite
700	420	18	60	TextBox 27	Dacite
484	124	18	100		Phonolite
322	264	18	80	TextBox 21	Phonotephrite
231.111	518.11	36	45		Picro- basalt
790	300	18	100	TextBox 26	Rhyolite
400	197	18	100		Tephriphonolite
346	395	36	50	TextBox 22	Trachy- basalt
493	310	18	100	TextBox 24	Trachyandesite
620	243	18	60	TextBox 25	Trachyte

## Sheet: XChartDiagramsData
	ol {1}	cpx {1}	spn {1}	fsp {1}	opx {1}	rhm {1}
1234.57
1224.57	0.834235
1214.57	1.81117
1204.57	2.75286
1194.57	3.66096
1184.57	4.53708
1174.57	5.38275
1164.57	6.19945
1154.57	6.98858
1144.57	7.75152
1152.98	7.75
1142.98	7.75
1132.98	8.0121
1122.98	8.83677
1112.98	9.63385
1102.98	10.4027	10.4126
1092.98	10.4012	14.1407
1082.98	10.4012	17.8018	18.285
1072.98	10.4012	21.4571	23.3574
1062.98	10.4012	24.4583	27.4487
1052.98	10.4012	26.9869	30.842
1042.98	10.4012	29.159	33.716
1032.98	10.4012	31.0534	36.1898
1022.98	10.4012	32.7173	38.3424	38.3818
1012.98	10.4012	33.772	40.0035	41.9847
1002.98	10.4012	34.6636	41.4194	45.2236
992.976	10.4012	35.4227	42.6358	48.1601
982.976	10.4012	36.023	43.6355	50.8349	50.8826
972.976	10.4012	36.1702	44.1194	53.2444	53.6813
962.976	10.4012	36.2512	44.4264	55.4149	56.2337	56.2916
952.976	10.4012	36.2829	44.6098	57.3895	58.5771	58.7256
942.976	10.4012	36.2947	44.758	59.2251	60.7481	60.9756

## Sheet: XChartData
		X	Y				X	Y				X	Y				X	Y				X	Y				X	Y				X	Y				X	Y				X	Y				X	Y
			Wallrock					Magma					Magma					Magma					Magma					Magma					Magma					Magma					Magma					Magma
		Chart0					Chart1					Chart2					Chart3					Chart4					Chart5					Chart6					Chart7					Chart8					Chart9
		Wallrock/Temperature	Wallrock/LiquidPercent	Temp			Magma/MgO	Magma/SiO2	Temp			Magma/MgO	Magma/TiO2	Temp			Magma/MgO	Magma/Al2O3	Temp			Magma/MgO	Magma/FeO	Temp			Magma/MgO	Magma/Fe2O3	Temp			Magma/MgO	Magma/MnO	Temp			Magma/MgO	Magma/CaO	Temp			Magma/MgO	Magma/Na2O	Temp			Magma/MgO	Magma/K2O	Temp
							9.91643	49.1187	1234.57			9.91643	2.17995	1234.57			9.91643	11.8893	1234.57			9.91643	9.52162	1234.57			9.91643	2.41281	1234.57			9.91643	0.17739	1234.57			9.91643	9.4468	1234.57			9.91643	2.31018	1234.57			9.91643	0.737246	1234.57
							9.60592	49.1947	1224.57			9.60592	2.19851	1224.57			9.60592	11.9905	1224.57			9.60592	9.50274	1224.57			9.60592	2.42351	1224.57			9.60592	0.177152	1224.57			9.60592	9.52448	1224.57			9.60592	2.32984	1224.57			9.60592	0.743522	1224.57
							9.23887	49.2863	1214.57			9.23887	2.22065	1214.57			9.23887	12.1112	1214.57			9.23887	9.47764	1214.57			9.23887	2.43469	1214.57			9.23887	0.176815	1214.57			9.23887	9.6171	1214.57			9.23887	2.3533	1214.57			9.23887	0.75101	1214.57
							8.88138	49.3771	1204.57			8.88138	2.24242	1204.57			8.88138	12.2299	1204.57			8.88138	9.44909	1204.57			8.88138	2.44553	1204.57			8.88138	0.176432	1204.57			8.88138	9.70811	1204.57			8.88138	2.37637	1204.57			8.88138	0.758372	1204.57
							8.53332	49.4672	1194.57			8.53332	2.26382	1194.57			8.53332	12.3466	1194.57			8.53332	9.4171	1194.57			8.53332	2.45601	1194.57			8.53332	0.176002	1194.57			8.53332	9.79752	1194.57			8.53332	2.39905	1194.57			8.53332	0.765609	1194.57
							8.1946	49.5565	1184.57			8.1946	2.28485	1184.57			8.1946	12.4614	1184.57			8.1946	9.3817	1184.57			8.1946	2.46616	1184.57			8.1946	0.175527	1184.57			8.1946	9.88536	1184.57			8.1946	2.42134	1184.57			8.1946	0.772724	1184.57
							7.86507	49.6451	1174.57			7.86507	2.30554	1174.57			7.86507	12.5742	1174.57			7.86507	9.34292	1174.57			7.86507	2.47598	1174.57			7.86507	0.175007	1174.57			7.86507	9.97167	1174.57			7.86507	2.44326	1174.57			7.86507	0.779718	1174.57
							7.54462	49.733	1164.57			7.54462	2.32587	1164.57			7.54462	12.6851	1164.57			7.54462	9.30075	1164.57			7.54462	2.48545	1164.57			7.54462	0.174442	1164.57			7.54462	10.0565	1164.57			7.54462	2.46481	1164.57			7.54462	0.786594	1164.57
							7.2331	49.8203	1154.57			7.2331	2.34586	1154.57			7.2331	12.7941	1154.57			7.2331	9.25521	1154.57			7.2331	2.4946	1154.57			7.2331	0.173833	1154.57			7.2331	10.1398	1154.57			7.2331	2.48599	1154.57			7.2331	0.793354	1154.57
							6.93038	49.9069	1144.57			6.93038	2.36551	1144.57			6.93038	12.9013	1144.57			6.93038	9.20631	1144.57			6.93038	2.50341	1144.57			6.93038	0.173181	1144.57			6.93038	10.2216	1144.57			6.93038	2.50682	1144.57			6.93038	0.800001	1144.57
							5.68301	53.8664	1152.98			5.68301	1.93923	1152.98			5.68301	13.4315	1152.98			5.68301	7.67147	1152.98			5.68301	2.11441	1152.98			5.68301	0.150129	1152.98			5.68301	8.4578	1152.98			5.68301	3.22141	1152.98			5.68301	1.15754	1152.98
							5.68296	53.8659	1142.98			5.68296	1.93921	1142.98			5.68296	13.4314	1142.98			5.68296	7.6635	1142.98			5.68296	2.12317	1142.98			5.68296	0.150128	1142.98			5.68296	8.45773	1142.98			5.68296	3.22138	1142.98			5.68296	1.15753	1142.98
							5.59972	53.8987	1132.98			5.59972	1.9436	1132.98			5.59972	13.4617	1132.98			5.59972	7.63895	1132.98			5.59972	2.13022	1132.98			5.59972	0.149854	1132.98			5.59972	8.4761	1132.98			5.59972	3.22866	1132.98			5.59972	1.16014	1132.98
							5.33894	54.0048	1122.98			5.33894	1.95755	1122.98			5.33894	13.5584	1122.98			5.33894	7.57541	1122.98			5.33894	2.13213	1122.98			5.33894	0.148933	1122.98			5.33894	8.53461	1122.98			5.33894	3.25185	1122.98			5.33894	1.16847	1122.98
							5.08682	54.1096	1112.98			5.08682	1.97124	1112.98			5.08682	13.6532	1112.98			5.08682	7.5092	1112.98			5.08682	2.13367	1112.98			5.08682	0.147976	1112.98			5.08682	8.59192	1112.98			5.08682	3.27458	1112.98			5.08682	1.17664	1112.98
							4.84286	54.2132	1102.98			4.84286	1.98471	1102.98			4.84286	13.7468	1102.98			4.84286	7.44057	1102.98			4.84286	2.13483	1102.98			4.84286	0.146998	1102.98			4.84286	8.64694	1102.98			4.84286	3.29708	1102.98			4.84286	1.18473	1102.98
							4.4739	54.3542	1092.98			4.4739	2.01238	1092.98			4.4739	14.073	1092.98			4.4739	7.47166	1092.98			4.4739	2.13572	1092.98			4.4739	0.151995	1092.98			4.4739	8.25823	1092.98			4.4739	3.40249	1092.98			4.4739	1.22497	1092.98
							4.08238	54.7614	1082.98			4.08238	1.97144	1082.98			4.08238	14.4484	1082.98			4.08238	7.27435	1082.98			4.08238	2.08328	1082.98			4.08238	0.157941	1082.98			4.08238	7.88248	1082.98			4.08238	3.52843	1082.98			4.08238	1.27289	1082.98
							3.63838	55.7124	1072.98			3.63838	1.79653	1072.98			3.63838	14.9357	1072.98			3.63838	6.60024	1072.98			3.63838	1.91598	1072.98			3.63838	0.165853	1072.98			3.63838	7.53695	1072.98			3.63838	3.69722	1072.98			3.63838	1.33665	1072.98
							3.25682	56.5344	1062.98			3.25682	1.64951	1062.98			3.25682	15.359	1062.98			3.25682	6.02678	1062.98			3.25682	1.77091	1062.98			3.25682	0.172837	1062.98			3.25682	7.21472	1062.98			3.25682	3.84574	1062.98			3.25682	1.39295	1062.98
							2.92393	57.2588	1052.98			2.92393	1.52264	1052.98			2.92393	15.7318	1052.98			2.92393	5.52956	1052.98			2.92393	1.6432	1052.98			2.92393	0.179095	1052.98			2.92393	6.91241	1052.98			2.92393	3.97834	1052.98			2.92393	1.44338	1052.98
							2.63035	57.9064	1042.98			2.63035	1.41087	1042.98			2.63035	16.0634	1042.98			2.63035	5.09241	1042.98			2.63035	1.5295	1042.98			2.63035	0.184761	1042.98			2.63035	6.62746	1042.98			2.63035	4.09799	1042.98			2.63035	1.48904	1042.98
							2.36933	58.4919	1032.98			2.36933	1.31072	1032.98			2.36933	16.3603	1032.98			2.36933	4.70407	1032.98			2.36933	1.42744	1032.98			2.36933	0.189935	1032.98			2.36933	6.35784	1032.98			2.36933	4.20685	1032.98			2.36933	1.53074	1032.98
							2.13762	59.031	1022.98			2.13762	1.21969	1022.98			2.13762	16.6204	1022.98			2.13762	4.35614	1022.98			2.13762	1.33526	1022.98			2.13762	0.194768	1022.98			2.13762	6.10021	1022.98			2.13762	4.30666	1022.98			2.13762	1.56965	1022.98
							2.01619	59.7779	1012.98			2.01619	1.13872	1012.98			2.01619	16.5055	1012.98			2.01619	4.03064	1012.98			2.01619	1.25131	1012.98			2.01619	0.203286	1012.98			2.01619	5.7734	1012.98			2.01619	4.40193	1012.98			2.01619	1.63577	1012.98
							1.90754	60.4776	1002.98			1.90754	1.06539	1002.98			1.90754	16.379	1002.98			1.90754	3.73338	1002.98			1.90754	1.1738	1002.98			1.90754	0.211608	1002.98			1.90754	5.46604	1002.98			1.90754	4.48654	1002.98			1.90754	1.70008	1002.98
							1.81001	61.1353	992.976			1.81001	0.998687	992.976			1.81001	16.2428	992.976			1.81001	3.46076	992.976			1.81001	1.10196	992.976			1.81001	0.219765	992.976			1.81001	5.17663	992.976			1.81001	4.56118	992.976			1.81001	1.76283	992.976
							1.71647	61.7559	982.976			1.71647	0.939643	982.976			1.71647	16.091	982.976			1.71647	3.20927	982.976			1.71647	1.03537	982.976			1.71647	0.227914	982.976			1.71647	4.91175	982.976			1.71647	4.62657	982.976			1.71647	1.82516	982.976
							1.5889	62.349	972.976			1.5889	0.89983	972.976			1.5889	15.874	972.976			1.5889	2.97156	972.976			1.5889	0.974424	972.976			1.5889	0.236955	972.976			1.5889	4.72196	972.976			1.5889	4.68342	972.976			1.5889	1.8937	972.976
							1.46768	62.9094	962.976			1.46768	0.841642	962.976			1.46768	15.6399	962.976			1.46768	2.77939	962.976			1.46768	0.926023	962.976			1.46768	0.245202	962.976			1.46768	4.54427	962.976			1.46768	4.73162	962.976			1.46768	1.96235	962.976
							1.35329	63.4416	952.976			1.35329	0.772744	952.976			1.35329	15.393	952.976			1.35329	2.61933	952.976			1.35329	0.886553	952.976			1.35329	0.252865	952.976			1.35329	4.37833	952.976			1.35329	4.77177	952.976			1.35329	2.03093	952.976
							1.24867	63.9512	942.976			1.24867	0.710001	942.976			1.24867	15.1431	942.976			1.24867	2.46721	942.976			1.24867	0.848461	942.976			1.24867	0.260503	942.976			1.24867	4.22192	942.976			1.24867	4.80473	942.976			1.24867	2.09865	942.976

## Sheet: Summary2
Melts Run Mode	Magma T	Wallrock T	M Liq Mass	Mass in WR system	Incremental WR Liq added to Magma	Cumulative WR Liq added to Magma	WR RMass Liq (gm)	WR RMass Sol (gm)	Not in use	Not in use	Composite System Mass	Not In Use	WR Solids.aegirine {1}.Mass	WR Solids.aenigmatite {1}.Mass	WR Solids.alloy-liquid {1}.Mass	WR Solids.alloy-liquid {2}.Mass	WR Solids.alloy-solid {1}.Mass	WR Solids.alloy-solid {2}.Mass	WR Solids.amphibole {1}.Mass	WR Solids.amphibole {2}.Mass	WR Solids.apatite {1}.Mass	WR Solids.biotite {1}.Mass	WR Solids.biotite {2}.Mass	WR Solids.clinopyroxene {1}.Mass	WR Solids.clinopyroxene {2}.Mass	WR Solids.clinopyroxene {3}.Mass	WR Solids.corundum {1}.Mass	WR Solids.cristobalite {1}.Mass	WR Solids.cummingtonite {1}.Mass	WR Solids.cummingtonite {2}.Mass	WR Solids.fayalite {1}.Mass	WR Solids.feldspar {1}.Mass	WR Solids.feldspar {2}.Mass	WR Solids.garnet {1}.Mass	WR Solids.garnet {2}.Mass	WR Solids.hornblende {1}.Mass	WR Solids.hornblende {2}.Mass	WR Solids.kalsilite {1}.Mass	WR Solids.kalsilite {2}.Mass	WR Solids.leucite {1}.Mass	WR Solids.leucite {2}.Mass	WR Solids.melilite {1}.Mass	WR Solids.melilite {2}.Mass	WR Solids.muscovite {1}.Mass	WR Solids.nepheline {1}.Mass	WR Solids.nepheline {2}.Mass	WR Solids.olivine {1}.Mass	WR Solids.olivine {2}.Mass	WR Solids.ortho-oxide {1}.Mass
Melts Run Mode	Magma T	Wallrock T	M Liq Mass	Mass in WR system	Incremental WR Liq added to Magma	Cumulative WR Liq added to Magma	WR RMass Liq (gm)	WR RMass Sol (gm)	Not in use	Not in use	Composite System Mass	Not In Use	WR Solids.aegirine {1}.Mass	WR Solids.aenigmatite {1}.Mass	WR Solids.alloy-liquid {1}.Mass	WR Solids.alloy-liquid {2}.Mass	WR Solids.alloy-solid {1}.Mass	WR Solids.alloy-solid {2}.Mass	WR Solids.amphibole {1}.Mass	WR Solids.amphibole {2}.Mass	WR Solids.apatite {1}.Mass	WR Solids.biotite {1}.Mass	WR Solids.biotite {2}.Mass	WR Solids.clinopyroxene {1}.Mass	WR Solids.clinopyroxene {2}.Mass	WR Solids.clinopyroxene {3}.Mass	WR Solids.corundum {1}.Mass	WR Solids.cristobalite {1}.Mass	WR Solids.cummingtonite {1}.Mass	WR Solids.cummingtonite {2}.Mass	WR Solids.fayalite {1}.Mass	WR Solids.feldspar {1}.Mass	WR Solids.feldspar {2}.Mass	WR Solids.garnet {1}.Mass	WR Solids.garnet {2}.Mass	WR Solids.hornblende {1}.Mass	WR Solids.hornblende {2}.Mass	WR Solids.kalsilite {1}.Mass	WR Solids.kalsilite {2}.Mass	WR Solids.leucite {1}.Mass	WR Solids.leucite {2}.Mass	WR Solids.melilite {1}.Mass	WR Solids.melilite {2}.Mass	WR Solids.muscovite {1}.Mass	WR Solids.nepheline {1}.Mass	WR Solids.nepheline {2}.Mass	WR Solids.olivine {1}.Mass	WR Solids.olivine {2}.Mass	WR Solids.ortho-oxide {1}.Mass
MagmaFindLiquidus	1234.57		98.9509
MagmaEquilibrateB	1234.57		98.9509
MagmaEquilibrateA	1224.57		98.1157
MagmaEquilibrateB	1224.57		98.1157
MagmaEquilibrateA	1214.57		97.1375
MagmaEquilibrateB	1214.57		97.1375
MagmaEquilibrateA	1204.57		96.1946
MagmaEquilibrateB	1204.57		96.1946
MagmaEquilibrateA	1194.57		95.2852
MagmaEquilibrateB	1194.57		95.2852
MagmaEquilibrateA	1184.57		94.4079
MagmaEquilibrateB	1184.57		94.4079
MagmaEquilibrateA	1174.57		93.5611
MagmaEquilibrateB	1174.57		93.5611
MagmaEquilibrateA	1164.57		92.7432
MagmaEquilibrateB	1164.57		92.7432
MagmaEquilibrateA	1154.57		91.953
MagmaEquilibrateB	1154.57		91.953
MagmaEquilibrateA	1144.57		91.1889
MagmaEquilibrateB	1144.57		91.1889
RechargeEquilibrate	1200		99.7635										0	0	0	0	0	0	0	0	0	0	0	0	0	0	0	0	0	0	0	0	0	0	0	0	0	0	0	0	0	0	0	0	0	0	0	0	0
RMagmaChangeBulk	1152.98		116.134
MagmaEquilibrateC	1152.98		116.133
MagmaEquilibrateA	1142.98		116.134
MagmaEquilibrateB	1142.98		116.134
MagmaEquilibrateA	1132.98		115.872
MagmaEquilibrateB	1132.98		115.872
MagmaEquilibrateA	1122.98		115.046
MagmaEquilibrateB	1122.98		115.046
MagmaEquilibrateA	1112.98		114.248
MagmaEquilibrateB	1112.98		114.248
MagmaEquilibrateA	1102.98		113.467
MagmaEquilibrateB	1102.98		113.467
MagmaEquilibrateA	1092.98		109.74
MagmaEquilibrateB	1092.98		109.74
MagmaEquilibrateA	1082.98		105.609
MagmaEquilibrateB	1082.98		105.609
MagmaEquilibrateA	1072.98		100.571
MagmaEquilibrateB	1072.98		100.571
MagmaEquilibrateA	1062.98		96.5066
MagmaEquilibrateB	1062.98		96.5066
MagmaEquilibrateA	1052.98		93.1348
MagmaEquilibrateB	1052.98		93.1348
MagmaEquilibrateA	1042.98		90.2785
MagmaEquilibrateB	1042.98		90.2785
MagmaEquilibrateA	1032.98		87.8194
MagmaEquilibrateB	1032.98		87.8194
MagmaEquilibrateA	1022.98		85.6399
MagmaEquilibrateB	1022.98		85.6399
MagmaEquilibrateA	1012.98		82.0516
MagmaEquilibrateB	1012.98		82.0516
MagmaEquilibrateA	1002.98		78.825
MagmaEquilibrateB	1002.98		78.825
MagmaEquilibrateA	992.976		75.8989
MagmaEquilibrateB	992.976		75.8989
MagmaEquilibrateA	982.976		73.1853
MagmaEquilibrateB	982.976		73.1853
MagmaEquilibrateA	972.976		70.3929
MagmaEquilibrateB	972.976		70.3929
MagmaEquilibrateA	962.976		67.7866
MagmaEquilibrateB	962.976		67.7866
MagmaEquilibrateA	952.976		65.3551
MagmaEquilibrateB	952.976		65.3551
MagmaEquilibrateA	942.976		63.1074
MagmaEquilibrateB	942.976		63.1074
[truncated: 451 more columns]

## Sheet: MassChase
Melts Run Mode	File Handle	MeltsOutput.System.Mass	MeltsOutput.Liquids(1)	MeltsOutput.Oxygen.Mass	MeltsOutput.Solids(1)	MeltsOutput.Fractionate.Solids(1)	MeltsOutput.Fractionate.Solids(2)	MeltsOutput.Solids(2)	MeltsOutput.Fractionate.Solids(3)	MeltsOutput.Fractionate.Solids(4)	MeltsOutput.Fractionate.Solids(5)	MeltsOutput.Solids(3)	MeltsOutput.Fractionate.Solids(6)	MeltsOutput.Fractionate.Solids(7)	MeltsOutput.Solids(4)	MeltsOutput.Fractionate.Solids(8)	MeltsOutput.Fractionate.Solids(9)	MeltsOutput.Solids(5)	MeltsOutput.Fractionate.Solids(10)	MeltsOutput.Fractionate.Solids(11)
MagmaFindLiquidus	000001	98.9509	98.9509	42.5511
MagmaEquilibrateB	000002	98.9509	98.9509	42.5511
MagmaEquilibrateA	000003	98.95	98.1157	42.5501	0.834235
MagmaEquilibrateB	000004	98.95	98.1157	42.5501	0.0014935	0.832742
MagmaEquilibrateA	000005	98.1159	97.1375	42.5488	0.978433
MagmaEquilibrateB	000006	98.9487	97.1375	42.5488	0.00149634	0.976937	0.832742
MagmaEquilibrateA	000007	97.1378	96.1946	42.5476	0.943177
MagmaEquilibrateB	000008	98.9474	96.1946	42.5476	0.00149928	0.941678	1.80968
MagmaEquilibrateA	000009	96.1948	95.2852	42.5464	0.9096
MagmaEquilibrateB	000010	98.9462	95.2852	42.5464	0.00150234	0.908098	2.75136
MagmaEquilibrateA	000011	95.2856	94.4079	42.5452	0.877625
MagmaEquilibrateB	000012	98.945	94.4079	42.5452	0.00150553	0.876119	3.65945
MagmaEquilibrateA	000013	94.4083	93.5611	42.544	0.84718
MagmaEquilibrateB	000014	98.9438	93.5611	42.544	0.00150884	0.845671	4.53557
MagmaEquilibrateA	000015	93.5614	92.7432	42.5428	0.818205
MagmaEquilibrateB	000016	98.9427	92.7432	42.5428	0.0015123	0.816693	5.38125
MagmaEquilibrateA	000017	92.7436	91.953	42.5417	0.790647
MagmaEquilibrateB	000018	98.9416	91.953	42.5417	0.0015159	0.789131	6.19794
MagmaEquilibrateA	000019	91.9534	91.1889	42.5406	0.764456
MagmaEquilibrateB	000020	99.7635	99.7635	47.3717	0.00151967	0.762936	6.98707
RMagmaChangeBulk	000022	116.134	116.134	42.4843
MagmaEquilibrateC	000023	123.883	116.133	42.4834		7.75
MagmaEquilibrateA	000024	116.134	116.134	42.4844
MagmaEquilibrateB	000025	123.884	116.134	42.4844		7.75
MagmaEquilibrateA	000026	116.135	115.872	42.4847	0.2621
MagmaEquilibrateB	000027	123.885	115.872	42.4847	0.0015283	0.260571	7.75
MagmaEquilibrateA	000028	115.872	115.046	42.4831	0.826195
MagmaEquilibrateB	000029	123.883	115.046	42.4831	0.00153263	0.824663	8.01058
MagmaEquilibrateA	000030	115.046	114.248	42.4816	0.798615
MagmaEquilibrateB	000031	123.881	114.248	42.4816	0.00153718	0.797078	8.83524
MagmaEquilibrateA	000032	114.248	113.467	42.4801	0.770416			0.00987913
MagmaEquilibrateB	000033	123.88	113.467	42.4801	0.00154197	0.768874	0.00766207	0.00221706	9.63232
MagmaEquilibrateA	000034	113.472	109.74	42.4812	3.73187
MagmaEquilibrateB	000035	123.881	109.74	42.4812	0.00222214	3.72965	10.4012		0.00766207
MagmaEquilibrateA	000036	109.755	105.609	42.4939	3.6633			0.483233
MagmaEquilibrateB	000037	123.894	105.609	42.4939	0.00222691	3.66107	0.481136	0.00209696	10.4012	3.73731
MagmaEquilibrateA	000038	105.648	100.571	42.5286	3.65756			1.41917
MagmaEquilibrateB	000039	123.928	100.571	42.5286	0.00222978	3.65533	1.41707	0.00210373	10.4012	7.39838	0.481136
MagmaEquilibrateA	000040	100.602	96.5066	42.5554	3.00343			1.09212
MagmaEquilibrateB	000041	123.955	96.5066	42.5554	0.00223258	3.0012	1.09001	0.00211003	10.4012	11.0537	1.89821
MagmaEquilibrateA	000042	96.5325	93.1348	42.577	2.53079			0.866905
MagmaEquilibrateB	000043	123.977	93.1348	42.577	0.00223538	2.52855	0.864789	0.002116	10.4012	14.0549	2.98822
MagmaEquilibrateA	000044	93.1568	90.2785	42.5946	2.17431			0.703982
MagmaEquilibrateB	000045	123.994	90.2785	42.5946	0.00223823	2.17207	0.70186	0.00212174	10.4012	16.5835	3.85301
MagmaEquilibrateA	000046	90.2976	87.8194	42.6093	1.89666			0.581525
MagmaEquilibrateB	000047	124.009	87.8194	42.6093	0.00224118	1.89442	0.579397	0.00212732	10.4012	18.7555	4.55487
MagmaEquilibrateA	000048	87.8364	85.6399	42.6219	1.66617			0.0394419				0.490809
MagmaEquilibrateB	000049	124.022	85.6399	42.6219	0.00224418	1.66393	0.03671	0.00273186	0.488676	10.4012	20.65	0.00213273	5.13427
MagmaEquilibrateA	000050	85.6615	82.0516	42.6364	1.05695			1.9445				0.608498
MagmaEquilibrateB	000051	124.036	82.0516	42.6364	0.00224233	1.05471	1.94177	0.00272899	0.606361	10.4012	22.3139	0.00213613	0.03671	5.62294
MagmaEquilibrateA	000052	82.071	78.825	42.6487	0.893762			1.82576				0.526506
MagmaEquilibrateB	000053	124.049	78.825	42.6487	0.00224044	0.891522	1.82303	0.00272606	0.524367	10.4012	23.3686	0.00213933	1.97848	6.2293
MagmaEquilibrateA	000054	78.8426	75.8989	42.6592	0.761428			1.72281				0.459377
MagmaEquilibrateB	000055	124.059	75.8989	42.6592	0.00223851	0.759189	1.72009	0.00272307	0.457235	10.4012	24.2601	0.00214234	3.80151	6.75367
MagmaEquilibrateA	000056	75.9149	73.1853	42.668	0.0477075			0.602536				1.67783			0.401541
MagmaEquilibrateB	000057	124.068	73.1853	42.668	0.00217817	0.0455294	0.600299	0.00223683	1.67511	0.399396	10.4012	0.0027201	25.0193	5.5216	0.00214543	7.21091
MagmaEquilibrateA	000058	73.2008	70.3929	42.6743	0.391367			0.149358				1.92822			0.338986
MagmaEquilibrateB	000059	124.074	70.3929	42.6743	0.00218016	0.389187	0.147121	0.00223744	1.9255	0.336836	10.4012	0.0027176	0.0455294	25.6196	0.00215016	7.19671	7.6103
MagmaEquilibrateA	000060	70.4062	67.7866	42.6783	0.384075			0.0833181				1.86633			0.227974			0.0579043
MagmaEquilibrateB	000061	124.078	67.7866	42.6783	0.00218316	0.381892	0.0810802	0.00223792	1.86361	0.225817	0.056482	0.00271519	10.4012	0.434716	0.00215637	25.7667	9.12221	0.0014223	7.94714
MagmaEquilibrateA	000062	67.7998	65.3551	42.6809	0.370938			0.0339131				1.79389			0.153958			0.0920394
MagmaEquilibrateB	000063	124.081	65.3551	42.6809	0.00218698	0.368751	0.0316748	0.0022383	1.79118	0.151794	0.0906143	0.00271287	10.4012	0.816609	0.00216354	25.8478	10.9858	0.00142517	8.17295	0.056482
MagmaEquilibrateA	000064	65.3681	63.1074	42.6831	0.337637			0.0139851				1.69012			0.138543			0.0804264
MagmaEquilibrateB	000065	124.083	63.1074	42.6831	0.00219082	0.335446	0.0117464	0.0022387	1.68741	0.136373	0.0789984	0.00271056	10.4012	1.18536	0.00217029	25.8795	12.777	0.00142795	8.32475	0.147096

[truncated: 4 more sheets: StartingConditions, Snapshot, Summary, RunHistory]
