# Supplementary material
Source: publisher figshare collection journal article supplement (https://gsapubs.figshare.com/articles/dataset/_/22251046)
Supplement: Supplementary file 1 [file 2]

Huang, B., Wang, W., Zhao, J.H., Khattak, N.V., Huang, S.F., Lu, G.M., Xue, E.K., and Sun, L., 2023, Coupled alkaline high-Nb mafic rocks and adakitic granodiorites: Products of Neoproterozoic back-arc extension at the western margin of the Yangtze Block, South China: GSA Bulletin, <https://doi.org/10.1130/B36618.1>.

## Supplemental Material

**Figure S1.** Chondrite-normalized rare earth element (REE) distribution patterns of zircon grains from Yuanmou granodiorite, gabbros, and alkaline basalts.

**Figure S2.** Zr versus elements diagram for the Yuanmou pluton and associated dike to evaluate post-crystallization mobility of major and trace elements.

**Figure S3.** Harker diagram of Yuanmou adakitic and mafic rocks, magmatic evolution was simulated by using the software “Magma Chamber Simulator” with recharge and fractional crystallization (RFC) processes.

**Figure S4.** Plots of  $\epsilon\text{Hf}(t)$  versus  $\epsilon\text{Nd}(t)$  diagram for the Neoproterozoic adakitic rocks from the western margin of the Yangtze Block.

**Table S1.** Concordant results of zircon U-Pb ages for the Neoproterozoic Yuanmou granodiorite pluton and its mafic microgranular enclaves (MMEs) and associated dike.

**Table S2.** The major element analysis results of plagioclases for the Yuanmou granodiorites and MMEs and the major element analysis results of amphiboles and clinopyroxenes for the Yuanmou MMEs.

**Table S3.** The major and trace element analysis results for the Neoproterozoic adakitic, alkaline mafic and sub-alkaline mafic pluton in the western margin of the Yangtze Block.

**Table S4.** The isotope results for the Neoproterozoic mafic and adakitic pluton in the western margin of the Yangtze Block.

**File S1.** Original file of MCS. Magmatic evolution simulation of Yuanmou adakitic and mafic rocks, simulated by using the software “Magma Chamber Simulator” with recharge and fractional crystallization (RFC) processes.

Huang, B., Wang, W., Zhao, J.H., Khattak, N.V., Huang, S.F., Lu, G.M., Xue, E.K., and Sun, L., 2023, Coupled alkaline high-Nb mafic rocks and adakitic granodiorites: Products of Neoproterozoic back-arc extension at the western margin of the Yangtze Block, South China: GSA Bulletin, <https://doi.org/10.1130/B36618.1>.

## Supplementary materials

**Fig. S1** Chondrite-normalized REE distribution patterns of zircon grains from Yuanmou granodiorite, gabbros, and alkaline basalts.

**Fig. S2** Zr versus elements diagram for the Yuanmou pluton and associated dike to evaluate post-crystallization mobility of major and trace elements.

**Fig. S3** Harker diagram of Yuanmou adakitic and mafic rocks, magmatic evolution was simulated by using the soft ‘Magma Chamber Simulator’ (Bohrson et al. 2014) with Recharge, and Fractional crystallization (RFC) processes, in which the H<sub>2</sub>O contents of melts were set as 2 wt. % and the ‘Oxygen Fugacity’ were using ‘NNO’ (Nickel Nickel Oxygen fugacity), Original file of MCS are shown in the File S1.

**Fig. S4** Plots of  $\epsilon_{\text{Hf}(t)}$  vs  $\epsilon_{\text{Nd}(t)}$  diagram for the Neoproterozoic adakitic rocks from the western margin of the Yangtze Block (modified by Zhao et al. (2021)). The short-dotted line displays the mixing trend between the mantle wedge ( $\epsilon_{\text{Hf}} = +14$ ,  $\epsilon_{\text{Nd}} = +8$ ) and the sediment melt; the long-dotted line shows mixing path between AOC melt ( $\epsilon_{\text{Hf}} = +14$ ,  $\epsilon_{\text{Nd}} = +8$ ) and sediment melt ( $\epsilon_{\text{Hf}} = -13.7$ ,  $\epsilon_{\text{Nd}} = -15.54$ ). The grey thicker line represents mixing between AOC fluid and sediment fluid, and the grey thinner lines show the trend of the addition of slab-derived fluids into the mantle source. Trace element concentrations of the mixing members are from Hanyu et al. (2006), and the calculated mixing lines are from (Wang et al. 2016; Zhao et al. 2019). The numbers are percentages of sediment fluids or melts. The Neoproterozoic gabbros are also shown for comparison (Wang et al. 2016; Zhao et al. 2019). The evolution curve for ancient sediments is from Chauvel et al. (2008).

**Table S1** Concordant results of zircon U-Pb ages for the Neoproterozoic Yuanmou granodiorite pluton and its MMEs and associated dike.

**Table S2** The major analysis results of plagioclases for the Yuanmou granodiorites and MMEs and the major analysis results of amphiboles and clinopyroxenes for the Yuanmou MMEs.

**Table S3** The major and trace element analysis results for the Neoproterozoic adakitic, alkaline mafic and sub-alkaline mafic pluton in the western margin of the Yangtze

Block.

**Table S4** The isotope results for the Neoproterozoic mafic and adakitic pluton in the western margin of the Yangtze Block.

**File S1** Original file of MCS. Magmatic evolution simulation of Yuanmou adakitic and mafic rocks, simulated by using the soft ‘Magma Chamber Simulator’ (Bohrson et al. 2014) with Recharge, and Fractional crystallization (RFC) processes, in which the H<sub>2</sub>O contents of melts were set as 2 wt.% and the ‘Oxygen Fugacity’ were using ‘NNO’(Nickel Nickel Oxygen fugacity).

## Reference

- Bohrson, W.A., Spera, F.J., Ghiorso, M.S., Brown, G.A., Creamer, J.B., and Mayfield, A., 2014, Thermodynamic model for energy-constrained open-system evolution of crustal magma bodies undergoing simultaneous recharge, assimilation and crystallization: the magma chamber simulator: *Journal of Petrology*, v. 55, no. 9, p. 1685–1717, <https://doi.org/10.1093/petrology/egu036>.
- Du, L. L., Guo, J. H., Nutman, A. P., Wyman, D., Geng, Y. S., Yang, C. H., Liu, F. L., Ren, L. D., and Zhou, X. W., 2014, Implications for Rodinia reconstructions for the initiation of Neoproterozoic subduction at ~860Ma on the western margin of the Yangtze Block: Evidence from the Guandaoshan Pluton: *Lithos*, v. 196-197, p. 67-82, <https://doi.org/10.1016/j.lithos.2014.03.002>.
- Huang, X. L., Xu, Y. G., Lan, J. B., Yang, Q. J., and Luo, Z. Y., 2009, Neoproterozoic adakitic rocks from Mopanshan in the western Yangtze Craton: Partial melts of a thickened lower crust: *Lithos*, v. 112, no. 3-4, p. 367-381, <https://doi.org/10.1016/j.lithos.2009.03.028>.
- Li, H. B., Zhang, Z. C., Santosh, M., Li, Y. S., Han, L., Zhu, J., and Pan, R. H., 2019, Geochronological, geochemical and Sr–Nd isotopic fingerprinting of Neoproterozoic mafic dykes in the western margin of the Yangtze Block, SW China: Implications for Rodinia supercontinent breakup: *Precambrian Research*, v. 331, p. 105371, <https://doi.org/10.1016/j.precamres.2019.105371>.
- Li, Q. W., and Zhao, J. H., 2018a, The Neoproterozoic high-Mg dioritic dikes in South China formed by high pressures fractional crystallization of hydrous basaltic melts: *Precambrian Research*, v. 309, p. 198-211, <https://doi.org/10.1016/j.precamres.2017.04.009>.
- Li, Q. W., and Zhao, J. H., 2018b, Nature and Thermal State of the Lithosphere beneath the Western Margin of the Yangtze Block in South China during the Neoproterozoic: *The Journal of Geology*, v. 126, no. 3, p. 343-360, <https://doi.org/10.1086/697306>.
- Li, X. H., Zhu, W. G., Zhong, H., Wang, X. C., He, D. F., Bai, Z. J., Liu, F., 2010, The Tongde picritic dikes in the western Yangtze Block: evidence for ca. 800-Ma mantle plume magmatism in South China during the breakup of Rodinia. *J. Geol.*, v.118, p. 509–522, <https://doi.org/10.1086/655113>.

- Li, X. H., Li, Z. X., Zhou, H. W., Liu, Y., and Kinny, P. D., 2002, U-Pb zircon geochronology, geochemistry and Nd isotopic study of Neoproterozoic bimodal volcanic rocks in the Kangdian Rift of South China; implications for the initial rifting of Rodinia: *Precambrian research*, v. 113, no. 1-2, p. 135-154, [https://doi.org/10.1016/S0301-9268\(01\)00207-8](https://doi.org/10.1016/S0301-9268(01)00207-8).
- Li, X. H., Li, Z. X., Sinclair, J. A., Li, W., and Carter, G., 2006, Revisiting the “Yanbian Terrane”: Implications for Neoproterozoic tectonic evolution of the western Yangtze Block, South China: *Precambrian Research*, v. 151, no. 1-2, p. 14-30, <https://doi.org/10.1016/j.precamres.2006.07.009>.
- Liu, Z., Tan, S. C., He, X. H., Wang D. B., and Gao, B., 2019, Petrogenesis of mid-Neoproterozoic (ca. 750 Ma) mafic and felsic intrusions in the Ailao Shan-Red River Belt; geochemical constraints on the paleogeographic position of the South China Block: *Lithosphere*, v. 11, no. 3, p. 348-364, <https://doi.org/10.1130/L1038.1>.
- Meng, E., Liu, F. L., Du, L. L., Liu, P. H., Liu, J.H., 2015, Petrogenesis and tectonic significance of the Baoxing granitic and mafic intrusions, Southwestern China: evidence from zircon U-Pb dating and Lu-Hf isotopes, and whole-rock geochemistry. *Gondwana Res.* v. 28, p. 800-815, <https://doi.org/10.1016/j.gr.2014.07.003>.
- Munteanu, M., Wilson, A., Yao, Y., Harris, C., Chunnnett, G., and Luo, Y., 2010, The Tongde dioritic pluton (Sichuan, SW China) and its geotectonic setting: Regional implications of a local-scale study: *Gondwana Research*, v. 18, no. 2-3, p. 455-465, <https://doi.org/10.1016/j.gr.2010.01.005>.
- Sun W. H., 2009, The Neoproterozoic Yanbian group and associated plutons in the western Yangtze Block, SW China. (Thesis). University of Hong Kong, Pokfulam, Hong Kong SAR. Retrieved from [http://doi.org/10.5353/th\\_b4189715](http://doi.org/10.5353/th_b4189715).
- Sun, W. H., Zhou, M. F., and Zhao, J. H., 2007, Geochemistry and Tectonic Significance of Basaltic Lavas in the Neoproterozoic Yanbian Group, Southern Sichuan Province, Southwest China: *International Geology Review*, v. 49, no. 6, p. 554-571, <https://doi.org/10.2747/0020-6814.49.6.554>.
- Yang, Y. J., Zhu, W. G., Bai, Z. J., Zhong, H., Ye, X. T., and Fan, H. P., 2017, Petrogenesis and tectonic implications of the Neoproterozoic Datian mafic-ultramafic dykes in the Panzhihua area, western Yangtze Block, SW China: *Int J Earth Sci*, v. 106, no. 1, p. 185-213, <https://doi.org/10.1007/s00531-016-1310-7>.
- Zhao, J. H., and Zhou, M. F., 2007, Neoproterozoic Adakitic Plutons and Arc Magmatism along the Western Margin of the Yangtze Block, South China: *The Journal of Geology*, v. 115, no. 6, p. 675-689, <https://doi.org/10.1086/521610>.
- Zhao, J. H., and Zhou, M. F., 2007, Geochemistry of Neoproterozoic mafic intrusions in the Panzhihua district (Sichuan Province, SW China): Implications for subduction-related metasomatism in the upper mantle: *Precambrian Research*, v. 152, no. 1-2, p. 27-47, <https://doi.org/10.1016/j.precamres.2006.09.002>.
- Zhao, J. H., Nebel, O., and Johnson, T. E., 2021, Formation and Evolution of a Neoproterozoic Continental Magmatic Arc: *Journal of Petrology*, v. 62, no. 8, <https://doi.org/10.1093/petrology/egab029>.

- Zhao, J. H., Zhou, M. F., Wu, Y. B., Zheng, J. P., and Wang, W., 2019, Coupled evolution of Neoproterozoic arc mafic magmatism and mantle wedge in the western margin of the South China Craton: *Contributions to Mineralogy and Petrology*, v. 174, no. 4, <https://doi.org/10.1007/s00410-019-1573-7>.
- Zhou, M. F., Ma, Y. X., Yan, D. P., Xia, X. P., Zhao, J. H., and Sun, M., 2006, The Yanbian Terrane (Southern Sichuan Province, SW China): A Neoproterozoic arc assemblage in the western margin of the Yangtze Block: *Precambrian Research*, v. 144, no. 1-2, p. 19-38, <https://doi.org/10.1016/j.precamres.2005.11.002>.
- Zhou, M. F., Yan, D. P., Wang, C. L., Qi, L., and Kennedy, A., 2006, Subduction-related origin of the 750 Ma Xuelongbao adakitic complex (Sichuan Province, China): Implications for the tectonic setting of the giant Neoproterozoic magmatic event in South China: *Earth and Planetary Science Letters*, v. 248, no. 1-2, p. 286-300, <https://doi.org/10.1016/j.epsl.2006.05.032>.
- Zhu, W. G., Zhong, H., and Deng, H. L., 2006, SHRIMP Zircon U-Pb Age, Geochemistry, and Nd-Sr Isotopes of the Gaojiacun Mafic-Ultramafic Intrusive Complex, Southwest China. *International Geology Review* v. 48, p. 650-668, <https://doi.org/>.
- Zhu, W. G., Zhong, H., Li, X. H., Deng, H. L., He, D. F., Wu, K. W., and Bai, Z. J., 2008, SHRIMP zircon U-Pb geochronology, elemental, and Nd isotopic geochemistry of the Neoproterozoic mafic dyke in the Yanbian area, SW China: *Precambrian Research*, v. 164, no. 1-2, p. 66-85, <https://doi.org/10.1016/j.precamres.2008.03.006>.
- Zhu, W. G., Zhong, H., Li, X. H., Liu, B. G., Deng, H. L., and Qin, Y., 2007,  $^{40}\text{Ar}$ - $^{39}\text{Ar}$  age, geochemistry and Sr-Nd-Pb isotopes of the Neoproterozoic Lengshuiqing Cu-Ni sulfide-bearing mafic-ultramafic complex, SW China: *Precambrian Research*, v. 155, no. 1-2, p. 98-124, <https://doi.org/10.1016/j.precamres.2007.02.001>.
- Zhu, Y., Lai, S. C., Qin, J. F., Zhu, R. Z., Zhao, S. W., Liu, M., Zhang, F. Y., Zhang, Z. Z., and Yang, H., 2021, Peritectic assemblage entrainment (PAE) model for the petrogenesis of Neoproterozoic high-maficity I-type granitoids in the western Yangtze Block, South China: *Lithos*, v. 402-403, p. 106247, <https://doi.org/10.1016/j.lithos.2021.106247>.
- Zhu, Y., Lai, S. C., Qin, J. F., Zhu, R. Z., Zhang, F. Y., Zhang, Z. Z., and Gan, B. P., 2019a, Petrogenesis and geodynamic implications of Neoproterozoic gabbro-diorites, adakitic granites, and A-type granites in the southwestern margin of the Yangtze Block, South China: *Journal of Asian Earth Sciences*, v. 183, p. 103977, <https://doi.org/10.1016/j.jseaes.2019.103977>.

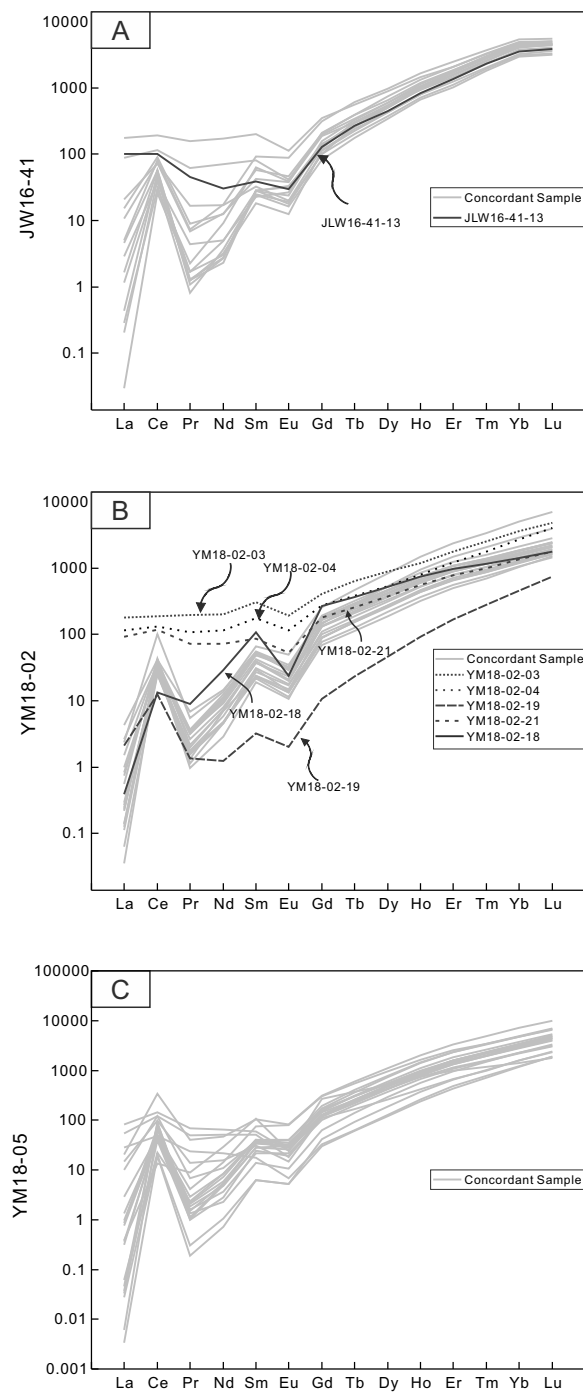

Fig. S1

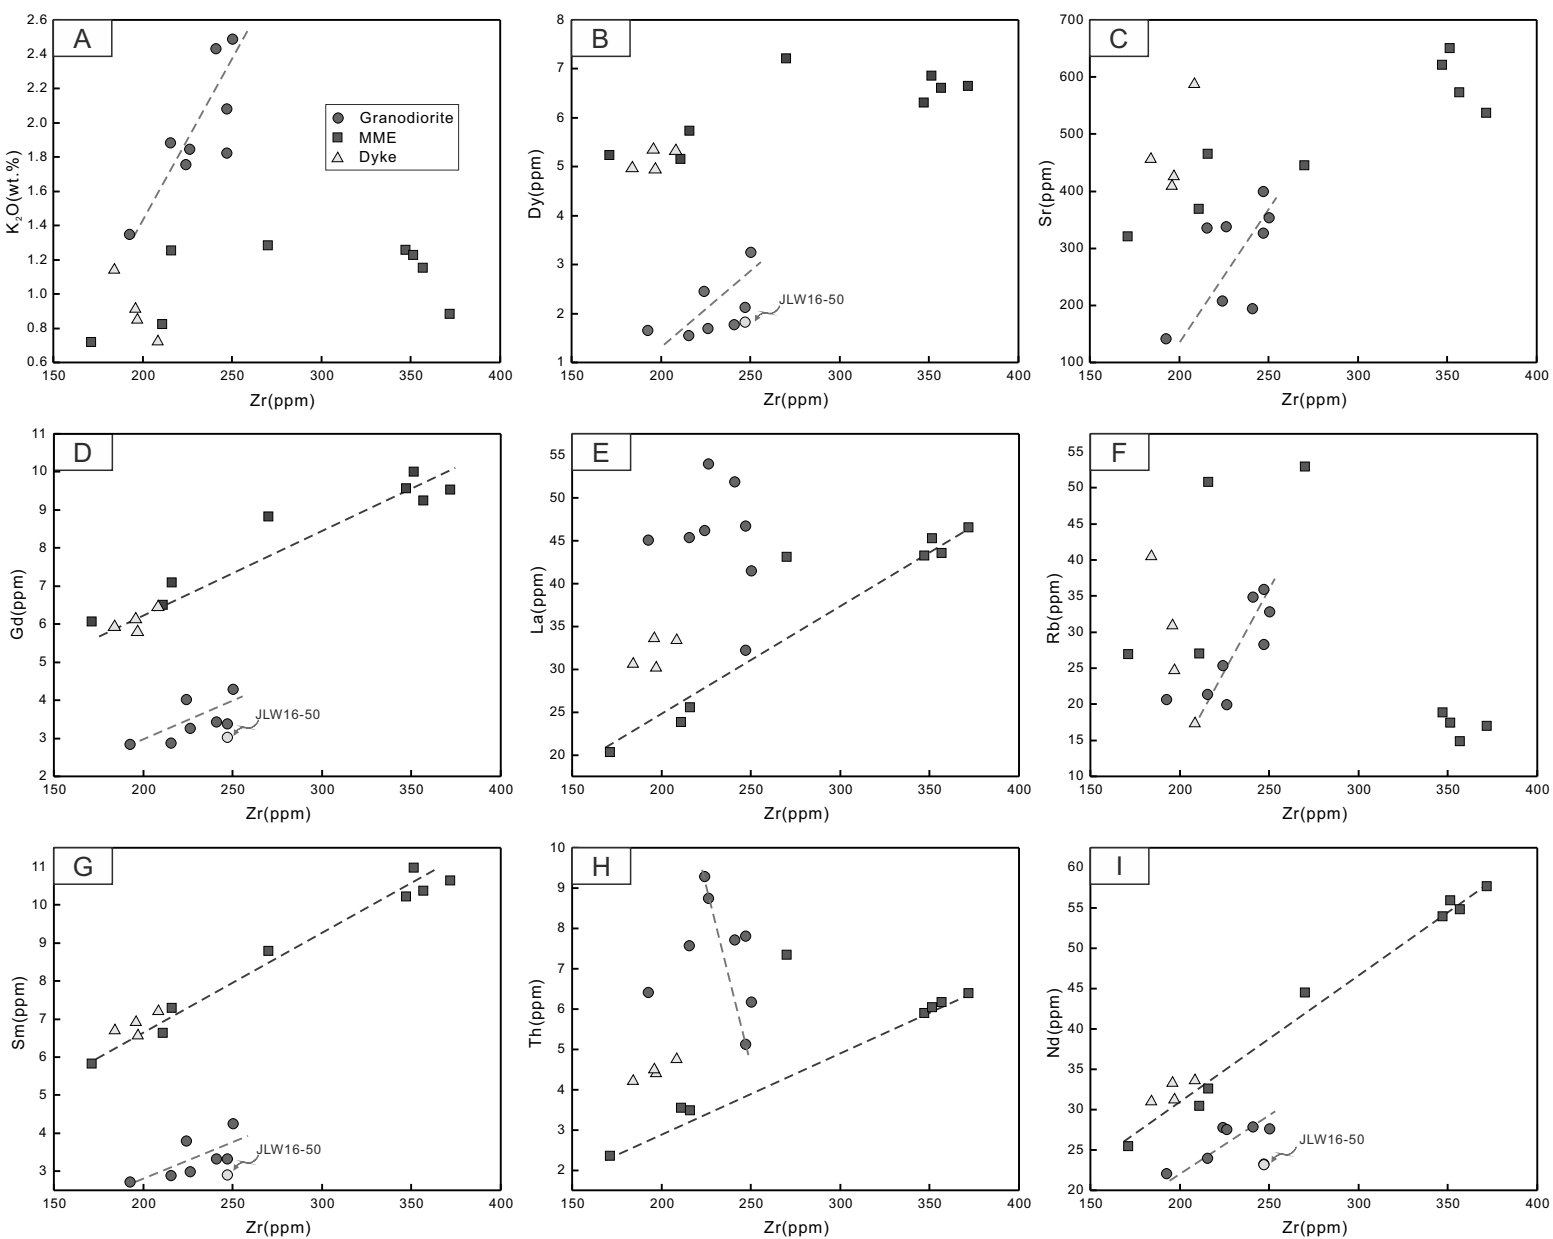

Fig. S2

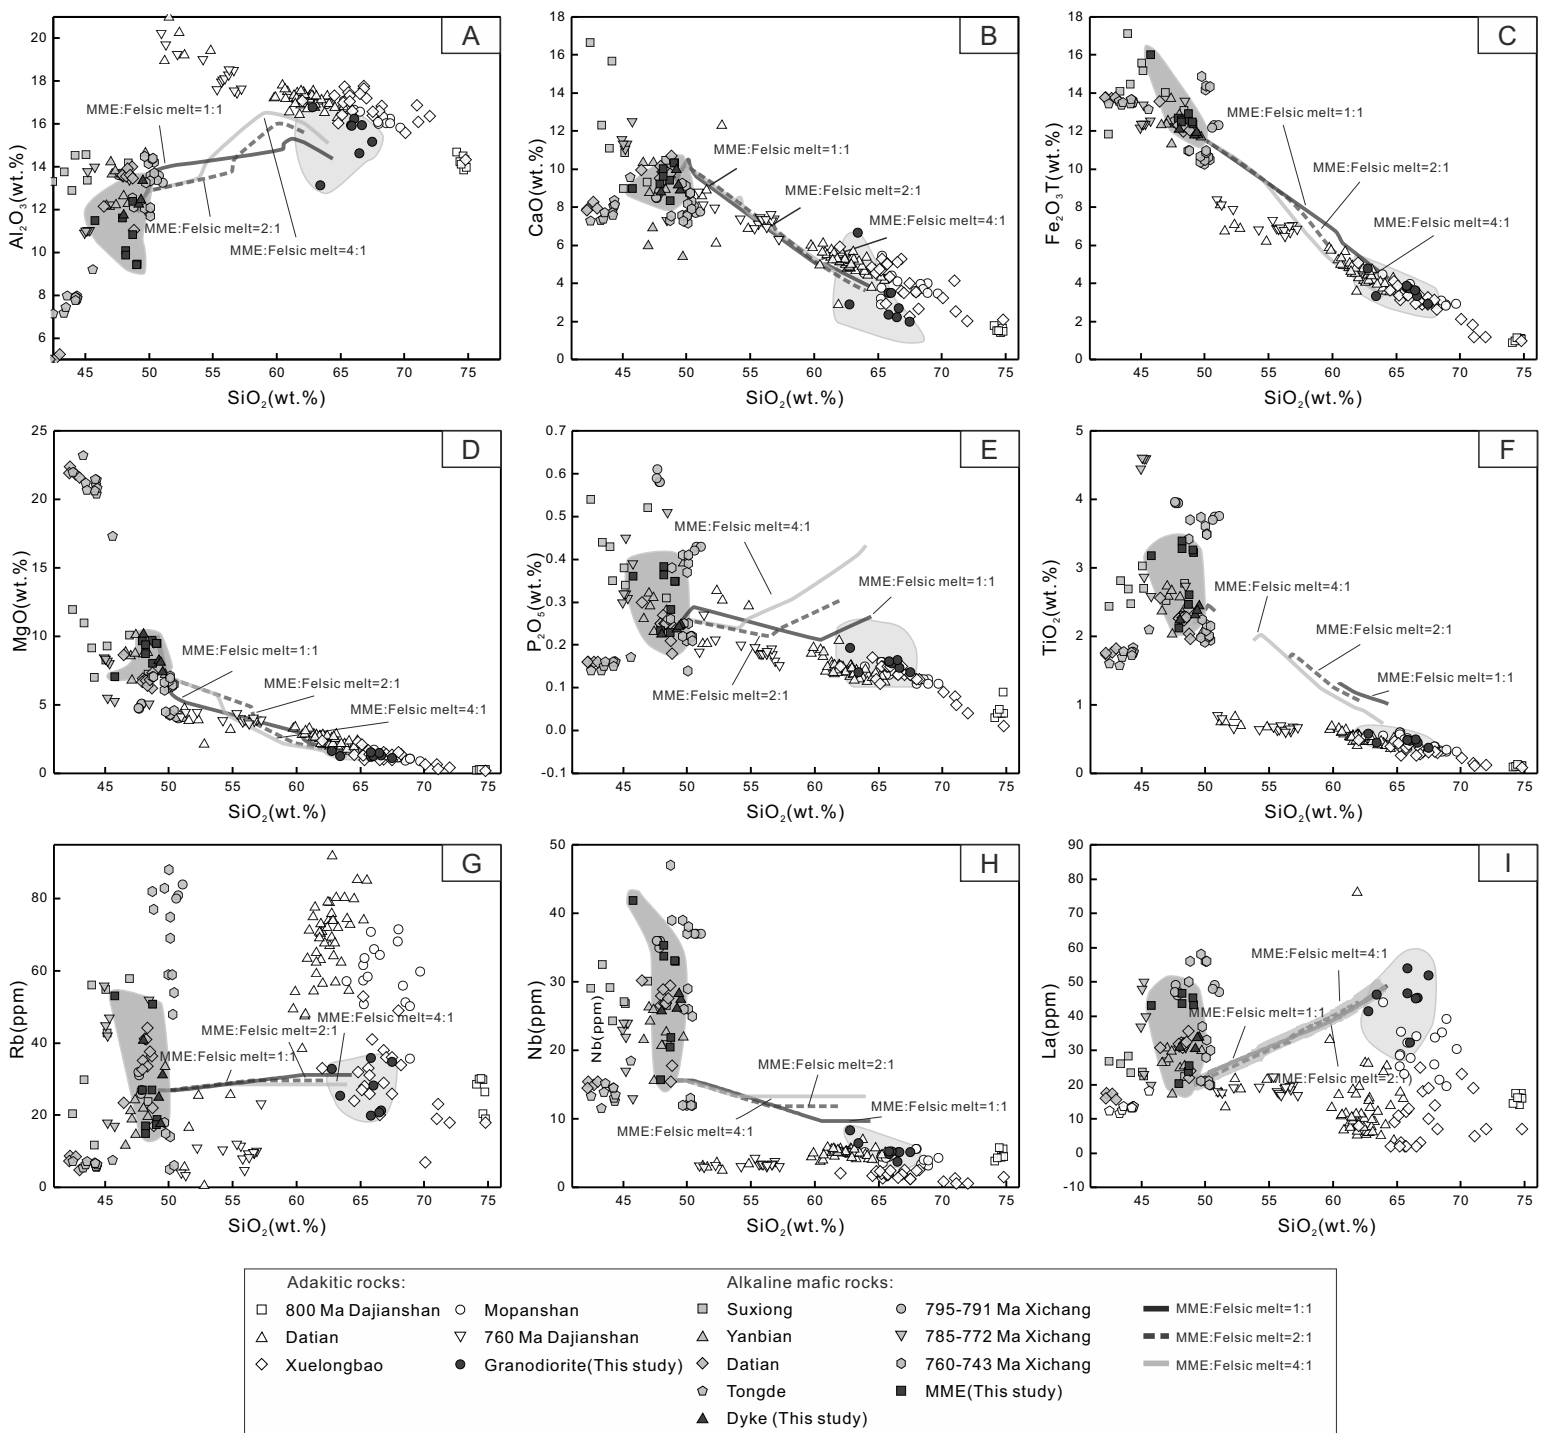

Fig. S3



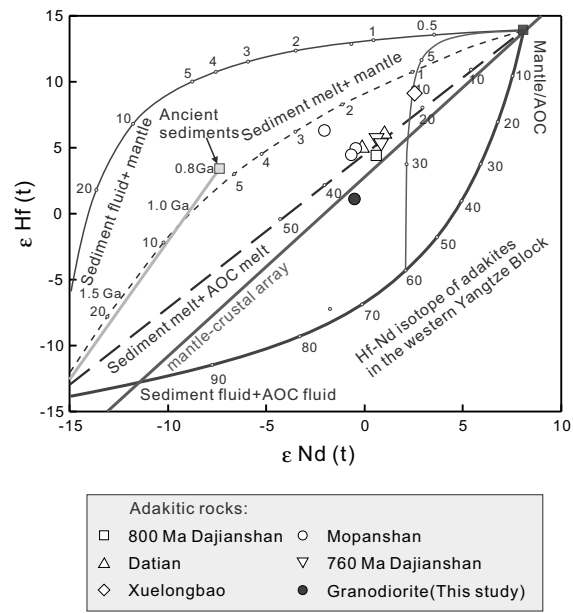

Fig. S4

**Table S1: Concordant results of zircon U-Pb ages for the Neoproterozoic Yuanmou granodiorite pluton and its MMEs and associated dike**

| Sample No.             | Th/U | Isotopic ratios    |        |                    |        |                    |        |                    |        | Rho    | Age (Ma)           |      |                    |    |                    |    |                    |    |
|------------------------|------|--------------------|--------|--------------------|--------|--------------------|--------|--------------------|--------|--------|--------------------|------|--------------------|----|--------------------|----|--------------------|----|
|                        |      | <sup>207</sup> Pb/ |        | <sup>207</sup> Pb/ |        | <sup>206</sup> Pb/ |        | <sup>208</sup> Pb/ |        |        | <sup>207</sup> Pb/ |      | <sup>207</sup> Pb/ |    | <sup>206</sup> Pb/ |    | <sup>208</sup> Pb/ |    |
|                        |      | <sup>206</sup> Pb  | 1σ     | <sup>235</sup> U   | 1σ     | <sup>238</sup> U   | 1σ     | <sup>232</sup> Th  | 1σ     |        | <sup>206</sup> Pb  | 1σ   | <sup>235</sup> U   | 1σ | <sup>238</sup> U   | 1σ | <sup>232</sup> Th  | 1σ |
| JLW16-41(Granodiorite) |      |                    |        |                    |        |                    |        |                    |        |        |                    |      |                    |    |                    |    |                    |    |
| JLW16-41-01            | 0.5  | 0.0656             | 0.0008 | 1.2521             | 0.0200 | 0.1385             | 0.0018 | 0.0592             | 0.0014 | 0.8174 | 791                | 27   | 824                | 9  | 836                | 10 | 1163               | 27 |
| JLW16-41-02            | 0.5  | 0.0660             | 0.0007 | 1.2625             | 0.0209 | 0.1387             | 0.0021 | 0.0545             | 0.0012 | 0.9072 | 806                | 22   | 829                | 9  | 837                | 12 | 1072               | 24 |
| JLW16-41-03            | 0.7  | 0.0651             | 0.0007 | 1.2130             | 0.0176 | 0.1351             | 0.0017 | 0.0522             | 0.0010 | 0.8672 | 777                | 223  | 807                | 8  | 817                | 10 | 1028               | 20 |
| JLW16-41-04            | 0.6  | 0.0662             | 0.0007 | 1.2528             | 0.0187 | 0.1371             | 0.0016 | 0.0567             | 0.0014 | 0.7652 | 813                | 22   | 825                | 8  | 828                | 9  | 1115               | 27 |
| JLW16-41-05            | 0.5  | 0.0647             | 0.0010 | 1.2133             | 0.0208 | 0.1363             | 0.0017 | 0.0537             | 0.0017 | 0.7370 | 765                | 32   | 807                | 10 | 824                | 10 | 1058               | 33 |
| JLW16-41-06            | 0.7  | 0.0646             | 0.0010 | 1.2248             | 0.0233 | 0.1374             | 0.0016 | 0.0540             | 0.0018 | 0.6249 | 761                | 33   | 812                | 11 | 830                | 9  | 1064               | 34 |
| JLW16-41-07            | 0.6  | 0.0669             | 0.0013 | 1.2690             | 0.0233 | 0.1381             | 0.0018 | 0.0539             | 0.0020 | 0.7013 | 835                | 41   | 832                | 10 | 834                | 10 | 1062               | 38 |
| JLW16-41-08            | 0.9  | 0.0655             | 0.0009 | 1.1857             | 0.0215 | 0.1314             | 0.0017 | 0.0512             | 0.0018 | 0.7052 | 791                | 27   | 794                | 10 | 796                | 10 | 1009               | 34 |
| JLW16-41-09            | 0.7  | 0.0669             | 0.0011 | 1.2042             | 0.0261 | 0.1307             | 0.0022 | 0.0558             | 0.0021 | 0.7885 | 835                | -165 | 803                | 12 | 792                | 13 | 1097               | 41 |
| JLW16-41-10            | 0.6  | 0.0655             | 0.0010 | 1.2001             | 0.0239 | 0.1329             | 0.0019 | 0.0517             | 0.0019 | 0.7122 | 791                | 27   | 801                | 11 | 805                | 11 | 1018               | 36 |
| JLW16-41-11            | 1.1  | 0.0654             | 0.0012 | 1.1895             | 0.0242 | 0.1320             | 0.0017 | 0.0495             | 0.0017 | 0.6471 | 787                | 39   | 796                | 11 | 799                | 10 | 976                | 33 |
| JLW16-41-12            | 0.8  | 0.0652             | 0.0011 | 1.1789             | 0.0279 | 0.1308             | 0.0020 | 0.0522             | 0.0020 | 0.6542 | 789                | 37   | 791                | 13 | 793                | 12 | 1028               | 39 |
| JLW16-41-13            | 0.6  | 0.0742             | 0.0011 | 1.4048             | 0.0348 | 0.1367             | 0.0023 | 0.0591             | 0.0023 | 0.6922 | 1056               | 30   | 891                | 15 | 826                | 13 | 1161               | 43 |
| JLW16-41-14            | 0.7  | 0.0649             | 0.0012 | 1.1826             | 0.0243 | 0.1322             | 0.0021 | 0.0486             | 0.0015 | 0.7893 | 772                | 39   | 793                | 11 | 800                | 12 | 959                | 29 |
| JLW16-41-15            | 0.6  | 0.0655             | 0.0009 | 1.2076             | 0.0211 | 0.1335             | 0.0021 | 0.0468             | 0.0013 | 0.9154 | 791                | 29   | 804                | 10 | 808                | 12 | 924                | 25 |
| JLW16-41-16            | 0.9  | 0.0640             | 0.0010 | 1.2132             | 0.0233 | 0.1371             | 0.0019 | 0.0489             | 0.0015 | 0.7394 | 740                | 31   | 807                | 11 | 828                | 11 | 965                | 28 |
| YM18-02(Dike)          |      |                    |        |                    |        |                    |        |                    |        |        |                    |      |                    |    |                    |    |                    |    |
| YM18-02-02             | 0.8  | 0.0682             | 0.0010 | 1.2771             | 0.0222 | 0.1356             | 0.0015 | 0.0405             | 0.0006 | 0.4994 | 874                | 31   | 836                | 10 | 820                | 9  | 802                | 12 |
| YM18-02-03             | 1.0  | 0.0953             | 0.0015 | 1.2396             | 0.0185 | 0.0943             | 0.0009 | 0.0354             | 0.0006 | 0.2637 | 1533               | 28   | 819                | 8  | 581                | 5  | 702                | 11 |
| YM18-02-04             | 0.9  | 0.0699             | 0.0012 | 0.9708             | 0.0179 | 0.1003             | 0.0009 | 0.0352             | 0.0005 | 0.4923 | 928                | 31   | 689                | 9  | 616                | 6  | 700                | 10 |
| YM18-02-05             | 1.5  | 0.0644             | 0.0017 | 1.1650             | 0.0300 | 0.1314             | 0.0014 | 0.0413             | 0.0007 | 0.1730 | 754                | 56   | 784                | 14 | 796                | 8  | 818                | 14 |
| YM18-02-06             | 1.5  | 0.0914             | 0.0029 | 1.6453             | 0.0607 | 0.1290             | 0.0014 | 0.0499             | 0.0015 | 0.5248 | 1454               | 61   | 988                | 23 | 782                | 8  | 985                | 28 |
| YM18-02-07             | 1.2  | 0.0653             | 0.0018 | 1.2093             | 0.0353 | 0.1347             | 0.0018 | 0.0442             | 0.0008 | 0.2192 | 785                | 59   | 805                | 16 | 814                | 10 | 875                | 16 |
| YM18-02-08             | 1.9  | 0.0739             | 0.0022 | 1.3199             | 0.0440 | 0.1291             | 0.0015 | 0.0397             | 0.0007 | 0.3601 | 1039               | 61   | 854                | 19 | 782                | 9  | 787                | 14 |
| YM18-02-09             | 0.8  | 0.0662             | 0.0013 | 1.1942             | 0.0246 | 0.1305             | 0.0012 | 0.0411             | 0.0007 | 0.4409 | 813                | 40   | 798                | 11 | 791                | 7  | 815                | 14 |
| YM18-02-10             | 1.7  | 0.0749             | 0.0020 | 1.3682             | 0.0366 | 0.1329             | 0.0017 | 0.0432             | 0.0008 | 0.2208 | 1065               | 53   | 875                | 16 | 805                | 10 | 854                | 15 |
| YM18-02-11             | 1.4  | 0.0710             | 0.0017 | 1.3208             | 0.0358 | 0.1352             | 0.0021 | 0.0433             | 0.0009 | 0.4010 | 967                | 50   | 855                | 16 | 817                | 12 | 857                | 17 |
| YM18-02-12             | 1.8  | 0.0808             | 0.0023 | 1.4139             | 0.0390 | 0.1276             | 0.0015 | 0.0427             | 0.0007 | 0.0580 | 1218               | 56   | 895                | 16 | 774                | 8  | 844                | 14 |
| YM18-02-13             | 1.9  | 0.1598             | 0.0061 | 3.0874             | 0.1473 | 0.1380             | 0.0015 | 0.0585             | 0.0012 | 0.5008 | 2453               | 65   | 1430               | 37 | 834                | 9  | 1149               | 23 |
| YM18-02-14             | 1.9  | 0.0656             | 0.0015 | 1.2063             | 0.0286 | 0.1334             | 0.0015 | 0.0421             | 0.0006 | 0.2945 | 794                | 48   | 803                | 13 | 807                | 8  | 833                | 12 |
| YM18-02-15             | 1.8  | 0.1082             | 0.0064 | 2.0665             | 0.1416 | 0.1343             | 0.0015 | 0.0493             | 0.0016 | 0.5565 | 1770               | 109  | 1138               | 47 | 812                | 9  | 972                | 30 |

|              |     |        |        |        |        |        |        |        |        |        |      |     |      |    |      |    |      |     |
|--------------|-----|--------|--------|--------|--------|--------|--------|--------|--------|--------|------|-----|------|----|------|----|------|-----|
| YM18-02-16   | 1.9 | 0.0679 | 0.0017 | 1.2016 | 0.0305 | 0.1285 | 0.0013 | 0.0410 | 0.0006 | 0.1719 | 865  | 52  | 801  | 14 | 779  | 7  | 813  | 12  |
| YM18-02-17   | 2.0 | 0.0668 | 0.0018 | 1.1883 | 0.0348 | 0.1290 | 0.0018 | 0.0404 | 0.0007 | 0.3576 | 831  | 56  | 795  | 16 | 782  | 10 | 800  | 14  |
| YM18-02-18   | 0.8 | 0.1169 | 0.0017 | 5.5126 | 0.0841 | 0.3422 | 0.0036 | 0.1028 | 0.0016 | 0.4936 | 1909 | 26  | 1903 | 13 | 1897 | 17 | 1977 | 30  |
| YM18-02-19   | 0.3 | 0.1412 | 0.0087 | 1.7212 | 0.1338 | 0.0848 | 0.0013 | 0.0990 | 0.0063 | 0.6118 | 2242 | 107 | 1016 | 50 | 525  | 8  | 1907 | 117 |
| YM18-02-20   | 1.3 | 0.0770 | 0.0028 | 1.3026 | 0.0563 | 0.1208 | 0.0014 | 0.0421 | 0.0008 | 0.4865 | 1122 | 74  | 847  | 25 | 735  | 8  | 833  | 16  |
| YM18-02-21   | 0.7 | 0.0559 | 0.0016 | 0.2112 | 0.0067 | 0.0273 | 0.0004 | 0.0094 | 0.0002 | 0.3814 | 450  | 69  | 195  | 6  | 174  | 2  | 189  | 4   |
| YM18-02-22   | 1.0 | 0.0738 | 0.0012 | 1.2207 | 0.0201 | 0.1196 | 0.0010 | 0.0402 | 0.0005 | 0.3388 | 1036 | 65  | 810  | 9  | 729  | 6  | 796  | 10  |
| YM18-02-23   | 1.5 | 0.0753 | 0.0019 | 1.4123 | 0.0366 | 0.1365 | 0.0020 | 0.0452 | 0.0009 | 0.3018 | 1076 | 46  | 894  | 15 | 825  | 11 | 894  | 17  |
| YM18-02-24   | 1.5 | 0.0940 | 0.0032 | 1.7180 | 0.0596 | 0.1329 | 0.0014 | 0.0472 | 0.0008 | 0.0700 | 1509 | 65  | 1015 | 22 | 804  | 8  | 933  | 16  |
| YM18-02-25   | 1.6 | 0.0682 | 0.0017 | 1.2323 | 0.0325 | 0.1305 | 0.0012 | 0.0409 | 0.0006 | 0.2669 | 876  | 46  | 815  | 15 | 791  | 7  | 810  | 12  |
| YM18-05(MME) |     |        |        |        |        |        |        |        |        |        |      |     |      |    |      |    |      |     |
| YM18-05-01   | 0.8 | 0.0650 | 0.0008 | 1.2195 | 0.0173 | 0.1355 | 0.0013 | 0.0426 | 0.0006 | 0.6384 | 774  | 27  | 810  | 8  | 819  | 7  | 843  | 12  |
| YM18-05-02   | 0.9 | 0.0649 | 0.0008 | 1.2302 | 0.0166 | 0.1369 | 0.0011 | 0.0435 | 0.0005 | 0.4043 | 772  | 28  | 814  | 8  | 827  | 6  | 861  | 10  |
| YM18-05-03   | 0.7 | 0.0655 | 0.0010 | 1.2143 | 0.0220 | 0.1336 | 0.0014 | 0.0412 | 0.0006 | 0.6081 | 791  | 33  | 807  | 10 | 809  | 8  | 816  | 12  |
| YM18-05-04   | 1.0 | 0.0649 | 0.0015 | 1.1963 | 0.0270 | 0.1341 | 0.0016 | 0.0400 | 0.0007 | 0.1565 | 769  | 49  | 799  | 13 | 811  | 9  | 792  | 14  |
| YM18-05-05   | 0.8 | 0.0671 | 0.0012 | 1.2227 | 0.0236 | 0.1319 | 0.0018 | 0.0408 | 0.0008 | 0.4974 | 843  | 37  | 811  | 11 | 799  | 10 | 809  | 15  |
| YM18-05-06   | 1.1 | 0.0652 | 0.0013 | 1.2195 | 0.0261 | 0.1350 | 0.0015 | 0.0424 | 0.0008 | 0.3360 | 783  | 47  | 810  | 12 | 816  | 9  | 839  | 15  |
| YM18-05-07   | 1.3 | 0.0641 | 0.0011 | 1.1641 | 0.0225 | 0.1311 | 0.0013 | 0.0398 | 0.0006 | 0.4478 | 743  | 42  | 784  | 11 | 794  | 8  | 788  | 11  |
| YM18-05-08   | 0.9 | 0.0659 | 0.0010 | 1.2152 | 0.0216 | 0.1330 | 0.0014 | 0.0410 | 0.0007 | 0.5722 | 806  | 32  | 808  | 10 | 805  | 8  | 812  | 13  |
| YM18-05-09   | 0.8 | 0.0663 | 0.0011 | 1.2156 | 0.0229 | 0.1323 | 0.0015 | 0.0421 | 0.0007 | 0.6163 | 815  | 31  | 808  | 10 | 801  | 9  | 833  | 14  |
| YM18-05-10   | 1.1 | 0.0637 | 0.0011 | 1.1587 | 0.0207 | 0.1315 | 0.0013 | 0.0401 | 0.0006 | 0.4608 | 731  | 35  | 781  | 10 | 796  | 8  | 794  | 12  |
| YM18-05-11   | 1.1 | 0.0647 | 0.0011 | 1.1949 | 0.0210 | 0.1333 | 0.0014 | 0.0402 | 0.0006 | 0.4948 | 765  | 234 | 798  | 10 | 807  | 8  | 797  | 11  |
| YM18-05-12   | 0.7 | 0.0660 | 0.0012 | 1.1956 | 0.0231 | 0.1310 | 0.0015 | 0.0399 | 0.0008 | 0.4224 | 807  | 44  | 799  | 11 | 793  | 9  | 791  | 15  |
| YM18-05-13   | 1.6 | 0.0651 | 0.0009 | 1.2142 | 0.0174 | 0.1348 | 0.0012 | 0.0435 | 0.0006 | 0.5503 | 776  | 30  | 807  | 8  | 815  | 7  | 860  | 12  |
| YM18-05-15   | 1.4 | 0.0650 | 0.0013 | 1.1862 | 0.0276 | 0.1318 | 0.0016 | 0.0407 | 0.0008 | 0.5176 | 776  | 43  | 794  | 13 | 798  | 9  | 807  | 16  |
| YM18-05-16   | 0.5 | 0.0637 | 0.0011 | 1.2100 | 0.0262 | 0.1370 | 0.0019 | 0.0437 | 0.0011 | 0.6690 | 733  | 37  | 805  | 12 | 828  | 11 | 864  | 21  |
| YM18-05-17   | 1.4 | 0.0704 | 0.0018 | 1.2838 | 0.0380 | 0.1312 | 0.0017 | 0.0431 | 0.0012 | 0.5052 | 940  | 52  | 839  | 17 | 795  | 10 | 853  | 22  |
| YM18-05-19   | 0.5 | 0.0639 | 0.0011 | 1.1683 | 0.0195 | 0.1323 | 0.0012 | 0.0413 | 0.0008 | 0.3324 | 739  | 36  | 786  | 9  | 801  | 7  | 818  | 15  |
| YM18-05-20   | 0.7 | 0.0637 | 0.0010 | 1.2218 | 0.0210 | 0.1387 | 0.0016 | 0.0427 | 0.0007 | 0.5609 | 731  | 33  | 811  | 10 | 837  | 9  | 846  | 14  |
| YM18-05-21   | 0.8 | 0.0621 | 0.0012 | 1.1540 | 0.0233 | 0.1340 | 0.0014 | 0.0410 | 0.0007 | 0.5046 | 680  | 40  | 779  | 11 | 811  | 8  | 813  | 14  |

| Sample                 | Al <sub>2</sub> O <sub>3</sub> | SiO <sub>2</sub> | K <sub>2</sub> O | CaO   | BaO   | FeO   | Na <sub>2</sub> O | MgO   | NiO   | MnO   | Cr <sub>2</sub> O <sub>3</sub> | TiO <sub>2</sub> | Total   | Na value<br>for<br>feldspar | <sup>§</sup> Molecular formula<br>in Clinopyroxene |     |     | <sup>&amp;</sup> Molecular formula<br>in amphibole |    |    | T    | P      | KD(F<br>e-Mg) |
|------------------------|--------------------------------|------------------|------------------|-------|-------|-------|-------------------|-------|-------|-------|--------------------------------|------------------|---------|-----------------------------|----------------------------------------------------|-----|-----|----------------------------------------------------|----|----|------|--------|---------------|
| No.                    |                                |                  |                  |       |       |       |                   |       |       |       |                                |                  |         |                             | FeO*                                               | MgO | CaO | Ca                                                 | Fe | Mg | (°C) | ( Gpa) |               |
| Feldspars for JLW16-44 |                                |                  |                  |       |       |       |                   |       |       |       |                                |                  |         |                             |                                                    |     |     |                                                    |    |    |      |        |               |
| kpl2                   | 19.03                          | 63.75            | 15.95            | 0.021 | 0.473 | 0.032 | 0.677             | -     | -     | 0.043 | -                              | 0.048            | 100.025 | 1.685                       |                                                    |     |     |                                                    |    |    |      |        |               |
| kpl3                   | 20                             | 69.56            | 0.033            | 0.088 | 0.029 | 0.03  | 10.99             | -     | 0.013 | 0.004 | -                              | -                | 100.742 | 0.440                       |                                                    |     |     |                                                    |    |    |      |        |               |
| kpl5                   | 19.96                          | 68.66            | 0.03             | 0.07  | 0.007 | 0.054 | 10.7              | 0.013 | -     | 0.011 | -                              | 0.013            | 99.514  | 0.440                       |                                                    |     |     |                                                    |    |    |      |        |               |
| kpl6                   | 18.84                          | 63.67            | 15.68            | 0.035 | 0.282 | 0.065 | 0.974             | 0.016 | -     | -     | -                              | 0.007            | 99.556  | 1.947                       |                                                    |     |     |                                                    |    |    |      |        |               |
| kpl7                   | 18.96                          | 65.6             | 14.95            | 0.05  | 0.242 | 0.046 | 0.975             | -     | -     | -     | 0.009                          | 0.004            | 100.830 | 1.947                       |                                                    |     |     |                                                    |    |    |      |        |               |
| kpl8                   | 20.02                          | 68.17            | 0.021            | 0.067 | 0.052 | -     | 11.26             | 0.011 | 0.011 | -     | 0.015                          | -                | 99.617  | 0.328                       |                                                    |     |     |                                                    |    |    |      |        |               |
| kpl9                   | 19.77                          | 68.5             | 0.029            | 0.109 | 0.032 | 0.103 | 11.14             | 0.001 | -     | 0.009 | 0.02                           | -                | 99.711  | 0.538                       |                                                    |     |     |                                                    |    |    |      |        |               |
| kpl10                  | 20.01                          | 69.12            | 0.03             | 0.034 | 0.008 | 0.033 | 10.72             | 0.01  | 0.02  | 0.008 | 0.061                          | -                | 100.052 | 0.175                       |                                                    |     |     |                                                    |    |    |      |        |               |
| kpl1                   | 20.13                          | 70.18            | 0.073            | 0.103 | -     | 0.046 | 9.323             | 0.002 | 0.018 | -     | 0.048                          | 0.007            | 99.924  | 0.607                       |                                                    |     |     |                                                    |    |    |      |        |               |
| kpl4                   | 19.06                          | 63.97            | 16.19            | 0.056 | 0.436 | 0.213 | 0.645             | -     | -     | -     | -                              | -                | 100.578 | 4.578                       |                                                    |     |     |                                                    |    |    |      |        |               |
| kpl11                  | 20                             | 68.59            | 0.018            | 0.149 | 0.022 | 0.022 | 11.24             | 0.004 | -     | -     | -                              | -                | 100.045 | 0.727                       |                                                    |     |     |                                                    |    |    |      |        |               |
| Feldspars for JLW16-48 |                                |                  |                  |       |       |       |                   |       |       |       |                                |                  |         |                             |                                                    |     |     |                                                    |    |    |      |        |               |
| pl1                    | 19.47                          | 68.48            | 0.029            | 0.146 | 0.027 | -     | 10.88             | -     | -     | -     | -                              | 0.004            | 99.030  | 0.736                       |                                                    |     |     |                                                    |    |    |      |        |               |
| pl1-2                  | 17.97                          | 71.65            | 0.032            | 0.058 | -     | 0.008 | 9.277             | 0.009 | 0.001 | 0.025 | 0.011                          | 0.026            | 99.061  | 0.344                       |                                                    |     |     |                                                    |    |    |      |        |               |
| pl2                    | 20.09                          | 68.88            | 0.013            | 0.021 | 0.077 | 0.014 | 10.87             | 0.009 | -     | 0.01  | -                              | 0.033            | 100.007 | 0.107                       |                                                    |     |     |                                                    |    |    |      |        |               |
| pl3                    | 20                             | 68.02            | 0.001            | 0.069 | 0.059 | 0.003 | 11.51             | 0.012 | -     | 0.001 | -                              | -                | 99.667  | 0.330                       |                                                    |     |     |                                                    |    |    |      |        |               |
| pl4                    | 19.85                          | 70.72            | 0.029            | 0.067 | -     | -     | 9.713             | -     | 0.009 | 0.013 | -                              | 0.023            | 100.426 | 0.380                       |                                                    |     |     |                                                    |    |    |      |        |               |
| pl5                    | 20.12                          | 69.38            | 0.031            | 0.063 | 0.013 | -     | 11.01             | -     | -     | 0.004 | -                              | 0.011            | 100.624 | 0.315                       |                                                    |     |     |                                                    |    |    |      |        |               |
| pl6                    | 19.78                          | 70.49            | 0.046            | 0.091 | -     | 0.039 | 10.3              | -     | -     | -     | 0.014                          | 0.002            | 100.770 | 0.486                       |                                                    |     |     |                                                    |    |    |      |        |               |
| pl7                    | 20.06                          | 70.55            | 0.035            | 0.185 | -     | -     | 9.069             | -     | 0.015 | 0.024 | -                              | 0.012            | 99.949  | 1.115                       |                                                    |     |     |                                                    |    |    |      |        |               |
| kfs1                   | 18.36                          | 64.25            | 16.13            | 0.034 | 0.426 | 0.024 | 0.131             | -     | 0.037 | 0.004 | 0.022                          | -                | 99.425  | 12.543                      |                                                    |     |     |                                                    |    |    |      |        |               |
| kfs2                   | 19.21                          | 63.33            | 16.29            | 0.008 | 0.765 | 0.024 | 0.516             | -     | 0.006 | -     | -                              | -                | 100.149 | 0.849                       |                                                    |     |     |                                                    |    |    |      |        |               |
| kfs3                   | 18.86                          | 64.6             | 16.82            | -     | 0.522 | 0.011 | 0.077             | -     | 0.005 | -     |                                |                  |         |                             |                                                    |     |     |                                                    |    |    |      |        |               |

|               |       |       |       |       |       |       |       |       |       |       |       |       |         |        |
|---------------|-------|-------|-------|-------|-------|-------|-------|-------|-------|-------|-------|-------|---------|--------|
| <b>kpl-1</b>  | 26.76 | 57.57 | 0.623 | 7.951 | 0.101 | 0.275 | 6.482 | 0.028 | -     | 0.037 | -     | -     | 99.818  | 40.400 |
| <b>kpl-2</b>  | 28.02 | 55.52 | 0.489 | 9.414 | 0.044 | 0.397 | 5.798 | 0.053 | 0.032 | 0.021 | -     | 0.079 | 99.862  | 47.292 |
| <b>kpl-3</b>  | 24.45 | 61.11 | 1.038 | 5.472 | 0.135 | 0.262 | 7.612 | 0.004 | 0.026 | -     | -     | 0.013 | 100.123 | 28.431 |
| <b>kpl-4</b>  | 25.12 | 59.47 | 0.905 | 6.089 | 0.121 | 0.248 | 7.244 | 0.016 | 0.013 | -     | -     | 0.037 | 99.262  | 31.717 |
| <b>kpl-5</b>  | 23.5  | 62.17 | 1.107 | 4.094 | -     | 0.183 | 8.154 | 0.011 | 0.03  | -     | -     | 0.009 | 99.251  | 21.719 |
| <b>kpl-6</b>  | 28.58 | 54.32 | 0.405 | 10.33 | 0.073 | 0.445 | 5.182 | 0.08  | -     | -     | -     | 0.052 | 99.471  | 52.422 |
| <b>kpl-7</b>  | 28.24 | 55.65 | 0.446 | 9.746 | 0.022 | 0.352 | 5.596 | 0.041 | 0.017 | -     | -     | 0.018 | 100.126 | 49.042 |
| <b>kpl-8</b>  | 28.11 | 55.24 | 0.454 | 9.752 | 0.056 | 0.347 | 5.5   | 0.023 | 0.034 | -     | -     | 0.077 | 99.586  | 49.490 |
| <b>kpl-9</b>  | 28.31 | 54.67 | 0.438 | 9.992 | -     | 0.368 | 5.469 | 0.037 | 0.025 | 0.019 | -     | 0.048 | 99.373  | 50.239 |
| <b>kpl-10</b> | 28.29 | 54.51 | 0.452 | 10.14 | 0.002 | 0.418 | 5.269 | 0.038 | -     | -     | 0.011 | 0.046 | 99.172  | 51.528 |

**Pyroxene for JLW16-51**

|            |       |       |       |       |   |       |       |       |       |       |       |       |         |       |       |       |
|------------|-------|-------|-------|-------|---|-------|-------|-------|-------|-------|-------|-------|---------|-------|-------|-------|
| <b>px1</b> | 3.24  | 53.26 | 0.015 | 19.05 | - | 7.697 | 0.283 | 16.37 | 0.027 | 0.152 | 0.223 | 0.538 | 100.849 | 0.235 | 0.890 | 0.745 |
| <b>px2</b> | 2.61  | 52.95 | 0.012 | 19.56 | - | 6.157 | 0.319 | 16.79 | 0.053 | 0.101 | 1.359 | 0.447 | 100.365 | 0.188 | 0.916 | 0.767 |
| <b>px3</b> | 3.653 | 52.12 | 0     | 19.75 | - | 6.993 | 0.279 | 16.07 | 0.058 | 0.107 | 0.435 | 0.732 | 100.192 | 0.215 | 0.880 | 0.777 |
| <b>px4</b> | 3.851 | 52.5  | 0     | 18.82 | - | 7.244 | 0.286 | 16.54 | 0.058 | 0.117 | 0.812 | 0.69  | 100.911 | 0.221 | 0.899 | 0.735 |
| <b>px5</b> | 4.123 | 50.22 | 0.016 | 18.63 | - | 9.102 | 0.328 | 15.53 | 0.088 | 0.149 | 0.216 | 0.873 | 99.276  | 0.283 | 0.862 | 0.743 |
| <b>px6</b> | 2.872 | 53.23 | 0.009 | 18.32 | - | 6.723 | 0.303 | 17.29 | 0.023 | 0.126 | 1.327 | 0.459 | 100.680 | 0.205 | 0.939 | 0.715 |

**Pyroxene for JLW16-54**

|            |       |       |       |       |   |       |       |       |       |       |       |       |         |       |       |       |      |      |       |
|------------|-------|-------|-------|-------|---|-------|-------|-------|-------|-------|-------|-------|---------|-------|-------|-------|------|------|-------|
| <b>px1</b> | 1.612 | 53.6  | 0.011 | 18.57 | - | 5.26  | 0.29  | 19.15 | 0     | 0.089 | 1.187 | 0.289 | 100.058 | 0.160 | 1.037 | 0.723 | 1196 | 0.28 | 0.295 |
| <b>px2</b> | 1.528 | 53.9  | 0     | 17.85 | - | 5.685 | 0.265 | 19.32 | -     | 0.116 | 1.076 | 0.278 | 100.016 | 0.173 | 1.047 | 0.695 | 1208 | 0.36 | 0.297 |
| <b>px3</b> | 1.947 | 53.32 | 0     | 19.99 | - | 4.964 | 0.304 | 18.17 | 0.022 | 0.115 | 1.094 | 0.34  | 100.265 | 0.151 | 0.984 | 0.778 | 1197 | 0.38 | 0.298 |
| <b>px4</b> | 3.22  | 51.46 | 0     | 19.44 | - | 7.091 | 0.321 | 16.85 | -     | 0.143 | 0.323 | 0.808 | 99.657  | 0.218 | 0.924 | 0.766 | 1167 | 0.28 | 0.286 |
| <b>px5</b> | 2.622 | 52.05 | 0.008 | 19.29 | - | 6.834 | 0.311 | 17.07 | 0.024 | 0.101 | 0.241 | 0.532 | 99.081  | 0.211 | 0.940 | 0.764 | 1164 | 0.26 | 0.287 |
| <b>px6</b> | 2.066 | 53.13 | 0     | 19.13 | - | 6.621 | 0.273 | 17.6  | 0.023 | 0.105 | 0.308 | 0.489 | 99.754  | 0.203 | 0.962 | 0.752 | 1156 | 0.17 | 0.285 |

**Pyroxene for JLW16-57**

|              |       |       |       |       |   |       |       |       |       |       |       |       |         |       |       |       |      |      |       |
|--------------|-------|-------|-------|-------|---|-------|-------|-------|-------|-------|-------|-------|---------|-------|-------|-------|------|------|-------|
| <b>px1</b>   | 5.754 | 48.91 | 0     | 20.57 | - | 8.96  | 0.497 | 13.36 | 0.009 | 0.181 | 0     | 1.088 | 99.322  | 0.280 | 0.744 | 0.823 | 1181 | 0.55 | 0.295 |
| <b>px2</b>   | 3.184 | 51.67 | 0.004 | 19.15 | - | 10.2  | 0.453 | 14.83 | 0.017 | 0.275 | 0     | 0.665 | 100.442 | 0.315 | 0.817 | 0.759 | 1188 | 0.50 | 0.292 |
| <b>px2-2</b> | 3.198 | 51.63 | 0.002 | 18.67 | - | 9.85  | 0.436 | 14.82 | 0.011 | 0.247 | 0     | 0.765 | 99.629  | 0.307 | 0.823 | 0.745 | 1188 | 0.50 | 0.293 |
| <b>px3</b>   | 4.878 | 49.5  | 0     | 21.1  | - | 8.716 | 0.47  | 13.86 | -     | 0.148 | 0.128 | 0.979 | 99.769  | 0.271 | 0.767 | 0.840 | 1172 | 0.48 | 0.294 |
| <b>px4</b>   | 4.265 | 49.36 | 0     | 19.07 | - | 10.98 | 0.452 | 13.52 | -     | 0.232 | 0.085 | 1.182 | 99.148  | 0.346 | 0.759 | 0.770 | 1190 | 0.52 | 0.294 |
| <b>px5</b>   | 4.628 | 50.95 | 0.014 | 18.51 | - | 8.129 | 0.518 | 15.71 | 0.022 | 0.153 | 0.111 | 0.536 | 99.274  | 0.252 | 0.867 | 0.734 |      |      |       |
| <b>px6</b>   | 3.231 | 51.24 | 0     | 19.44 | - | 9.086 | 0.373 | 15.31 | 0.067 | 0.131 | 0.126 | 0.708 | 99.718  | 0.282 | 0.847 | 0.773 | 1174 | 0.37 | 0.289 |
| <b>px8</b>   | 4.961 | 49.44 | 0.013 | 20.49 | - | 8.605 | 0.443 | 14.08 | 0.066 | 0.096 | 0.292 | 1.026 | 99.515  | 0.268 | 0.782 | 0.818 | 1176 | 0.47 | 0.293 |
| <b>px9</b>   | 3.331 | 51.07 | 0     | 19.21 | - | 8.976 | 0.428 | 15.33 | -     | 0.19  | 0     | 0.701 | 99.236  | 0.279 | 0.851 | 0.766 | 1184 | 0.47 | 0.293 |

|                               |       |       |       |       |   |       |       |       |       |       |       |       |         |       |       |       |       |      |       |
|-------------------------------|-------|-------|-------|-------|---|-------|-------|-------|-------|-------|-------|-------|---------|-------|-------|-------|-------|------|-------|
| <b>pxh1</b>                   | 5.836 | 48.46 | 0     | 19.27 | - | 10.02 | 0.668 | 13.05 | -     | 0.217 | 0.04  | 1.223 | 98.776  | 0.315 | 0.732 | 0.777 |       |      |       |
| <b>pxh2</b>                   | 5.353 | 49.14 | 0     | 20.22 | - | 9.048 | 0.541 | 13.71 | -     | 0.118 | 0.034 | 1.001 | 99.164  | 0.283 | 0.764 | 0.809 | 1191  | 0.61 | 0.297 |
| <b>pxh3</b>                   | 6.594 | 47.74 | 0     | 20.24 | - | 9.821 | 0.516 | 12.75 | 0.031 | 0.103 | 0.015 | 1.392 | 99.196  | 0.308 | 0.713 | 0.814 |       |      |       |
| <b>pxh4</b>                   | 3.168 | 51.2  | 0.001 | 19.88 | - | 9.282 | 0.439 | 15.04 | 0.024 | 0.168 | 0.045 | 0.654 | 99.904  | 0.288 | 0.831 | 0.789 | 1180  | 0.46 | 0.293 |
| <b>pxh5</b>                   | 3.233 | 50.69 | 0     | 20.25 | - | 8.888 | 0.353 | 14.99 | 0.017 | 0.145 | 0.079 | 0.658 | 99.298  | 0.277 | 0.833 | 0.808 | 1162  | 0.31 | 0.289 |
| <b>pxh6</b>                   | 3.563 | 51.02 | 0.016 | 19.88 | - | 9.087 | 0.492 | 14.87 | -     | 0.16  | 0.023 | 0.742 | 99.848  | 0.282 | 0.821 | 0.789 |       |      |       |
| <b>pxh7</b>                   | 3.984 | 50.34 | 0     | 20.08 | - | 9.412 | 0.476 | 14.74 | 0.011 | 0.227 | 0.039 | 0.843 | 100.154 | 0.291 | 0.813 | 0.795 |       |      |       |
| <b>pxh8</b>                   | 4.24  | 50.14 | 0     | 20.27 | - | 8.995 | 0.466 | 14.18 | -     | 0.159 | 0.015 | 0.913 | 99.378  | 0.281 | 0.789 | 0.810 | 1179  | 0.50 | 0.294 |
| <b>Pyroxene for JLW16-58</b>  |       |       |       |       |   |       |       |       |       |       |       |       |         |       |       |       |       |      |       |
| <b>px1</b>                    | 3.88  | 51.73 | 0     | 18.59 | - | 7.174 | 0.28  | 16.34 | 0.024 | 0.121 | 0.656 | 0.803 | 99.596  | 0.221 | 0.899 | 0.735 | 1134  | 0.25 | 0.283 |
| <b>px2</b>                    | 4.599 | 50.97 | 0     | 19.95 | - | 7.391 | 0.34  | 15.37 | -     | 0.103 | 0.417 | 0.766 | 99.902  | 0.228 | 0.844 | 0.788 | 1134  | 0.33 | 0.288 |
| <b>px3</b>                    | 4.849 | 50.45 | 0.005 | 19.5  | - | 7.121 | 0.307 | 15.3  | -     | 0.146 | 0.374 | 1.053 | 99.107  | 0.221 | 0.848 | 0.776 |       |      |       |
| <b>px3-2</b>                  | 3.433 | 51.58 | 0     | 20.17 | - | 6.036 | 0.304 | 16.55 | 0.006 | 0.124 | 1.248 | 0.567 | 100.021 | 0.185 | 0.905 | 0.793 | 1126  | 0.24 | 0.286 |
| <b>px4</b>                    | 4.304 | 51.81 | 0.002 | 19.39 | - | 7.701 | 0.284 | 15.77 | 0.077 | 0.113 | 0.732 | 0.747 | 100.924 | 0.235 | 0.859 | 0.760 |       |      |       |
| <b>px5</b>                    | 3.598 | 52.31 | 0.008 | 20.28 | - | 5.422 | 0.354 | 16.04 | -     | 0.107 | 1.173 | 0.617 | 99.902  | 0.167 | 0.878 | 0.798 |       |      |       |
| <b>px6</b>                    | 6.933 | 48.71 | 0.011 | 19.97 | - | 9.742 | 0.393 | 13.04 | -     | 0.143 | 0     | 1.349 | 100.290 | 0.302 | 0.721 | 0.794 |       |      |       |
| <b>px7</b>                    | 4.399 | 51.47 | 0.005 | 19.93 | - | 7.328 | 0.331 | 15.83 | 0.048 | 0.089 | 0.574 | 0.661 | 100.662 | 0.224 | 0.863 | 0.781 |       |      |       |
| <b>px7-2</b>                  | 3.588 | 52.87 | 0.005 | 20.28 | - | 6.76  | 0.306 | 16.13 | 0.019 | 0.123 | 0.824 | 0.503 | 101.401 | 0.205 | 0.872 | 0.788 |       |      |       |
| <b>Amphibole for JLW16-51</b> |       |       |       |       |   |       |       |       |       |       |       |       |         |       |       |       |       |      |       |
| <b>amp1</b>                   | 11.31 | 43.67 | 0.809 | 11.07 | - | 14.14 | 2.11  | 11.86 | -     | 0.125 | -     | 1.863 | 96.968  |       | 1.761 | 1.706 | 2.625 | 888  |       |
| <b>amp2</b>                   | 11.78 | 43.4  | 0.817 | 10.82 | - | 14.46 | 2.153 | 11.97 | -     | 0.155 | 0.044 | 1.699 | 97.298  |       | 1.712 | 1.704 | 2.636 | 896  |       |
| <b>amp3</b>                   | 12.18 | 42.47 | 0.936 | 11.04 | - | 14.12 | 2.177 | 11.87 | -     | 0.188 | -     | 2.024 | 97.004  |       | 1.758 | 1.695 | 2.630 | 915  |       |
| <b>amp4</b>                   | 11.61 | 43.61 | 0.864 | 11.26 | - | 14.17 | 2.084 | 12.15 | 0.013 | 0.251 | -     | 1.837 | 97.845  |       | 1.776 | 1.697 | 2.667 | 895  |       |
| <b>amp5</b>                   | 11.84 | 43.03 | 0.826 | 10.99 | - | 13.65 | 2.24  | 12.33 | -     | 0.155 | -     | 2.031 | 97.097  |       | 1.743 | 1.624 | 2.720 | 915  |       |
| <b>amp6</b>                   | 12.2  | 42.87 | 0.886 | 11    | - | 13.07 | 2.147 | 12.33 | 0.067 | 0.188 | -     | 2.259 | 97.019  |       | 1.744 | 1.563 | 2.720 | 923  |       |
| <b>amp7</b>                   | 12.18 | 42.84 | 0.734 | 10.6  | - | 12.47 | 2.309 | 13.17 | 0.048 | 0.099 | 0.008 | 2.219 | 96.667  |       | 1.672 | 1.434 | 2.892 | 939  |       |
| <b>amp8</b>                   | 11.93 | 43.04 | 0.803 | 10.81 | - | 14.65 | 2.168 | 11.7  | -     | 0.217 | -     | 1.795 | 97.101  |       | 1.717 | 1.746 | 2.586 | 899  |       |
| <b>amp9</b>                   | 12.25 | 42.57 | 0.864 | 10.86 | - | 13.17 | 2.193 | 12.62 | 0.04  | 0.158 | 0.004 | 2.08  | 96.806  |       | 1.722 | 1.546 | 2.784 | 928  |       |
| <b>Amphibole for JLW16-57</b> |       |       |       |       |   |       |       |       |       |       |       |       |         |       |       |       |       |      |       |
| <b>amp1</b>                   | 12.38 | 41.71 | 0.963 | 10.45 | - | 13.9  | 2.56  | 11.74 | 0.004 | 0.18  | 0.008 | 2.66  | 96.557  |       | 1.673 | 1.671 | 2.616 | 948  |       |
| <b>amp2</b>                   | 11.98 | 42.86 | 0.965 | 10.61 | - | 13.42 | 2.569 | 12.23 | 0.027 | 0.179 | -     | 2.717 | 97.550  |       | 1.677 | 1.605 | 2.689 | 940  |       |
| <b>amp3</b>                   | 12.19 | 42.18 | 0.95  | 10.51 | - | 15.03 | 2.482 | 11.21 | -     | 0.171 | -     | 2.615 | 97.335  |       | 1.676 | 1.806 | 2.486 | 929  |       |
| <b>amp4</b>                   | 12.28 | 42.42 | 0.982 | 10.38 | - | 14.75 | 2.492 | 12.01 | -     | 0.216 | -     | 2.379 | 97.907  |       | 1.638 | 1.720 | 2.637 | 935  |       |
| <b>amp5</b>                   | 11.57 | 42.64 | 0.922 | 10.77 | - | 13.2  | 2.53  | 12.42 | 0.012 | 0.152 | -     | 2.781 | 96.991  |       | 1.712 | 1.589 | 2.749 | 941  |       |
| <b>amp6</b>                   | 11.35 | 42.52 | 0.948 | 10.47 | - | 15.5  | 2.57  | 10.72 | 0.052 | 0.158 | 0.008 | 2.744 | 97.042  |       | 1.682 | 1.905 | 2.398 | 914  |       |

|                               |       |       |       |       |   |       |       |       |       |       |       |       |        |       |       |       |     |
|-------------------------------|-------|-------|-------|-------|---|-------|-------|-------|-------|-------|-------|-------|--------|-------|-------|-------|-----|
| <b>amp7</b>                   | 12.1  | 42.16 | 1.026 | 10.55 | - | 14.22 | 2.527 | 11.7  | 0.014 | 0.192 | -     | 2.847 | 97.329 | 1.679 | 1.710 | 2.591 | 942 |
| <b>amp8</b>                   | 11.69 | 42.92 | 1.017 | 10.57 | - | 13.91 | 2.503 | 12.32 | -     | 0.168 | 0.021 | 2.074 | 97.179 | 1.677 | 1.648 | 2.720 | 923 |
| <b>amp9</b>                   | 11.81 | 42.38 | 1.019 | 10.25 | - | 13.43 | 2.566 | 12.39 | -     | 0.171 | 0.069 | 2.706 | 96.786 | 1.631 | 1.585 | 2.743 | 946 |
| <b>Amphibole for JLW16-58</b> |       |       |       |       |   |       |       |       |       |       |       |       |        |       |       |       |     |
| <b>amp1</b>                   | 11.85 | 43.01 | 0.724 | 10.9  | - | 13.63 | 2.19  | 12.8  | -     | 0.159 | 0.017 | 1.572 | 96.854 | 1.726 | 1.583 | 2.820 | 912 |
| <b>amp2</b>                   | 11.46 | 43.56 | 0.777 | 10.99 | - | 14.64 | 2.162 | 11.91 | -     | 0.217 | 0.029 | 1.893 | 97.646 | 1.738 | 1.743 | 2.621 | 894 |
| <b>amp3</b>                   | 10.72 | 44.06 | 0.664 | 10.82 | - | 14.71 | 2.033 | 12.05 | 0.048 | 0.254 | -     | 1.858 | 97.219 | 1.714 | 1.751 | 2.658 | 878 |
| <b>amp4</b>                   | 11.71 | 43.28 | 0.749 | 10.65 | - | 15.46 | 2.123 | 11.09 | -     | 0.2   | 0.021 | 2.069 | 97.346 | 1.692 | 1.848 | 2.451 | 890 |
| <b>amp5</b>                   | 11.94 | 43.18 | 0.766 | 10.61 | - | 12.55 | 2.307 | 12.94 | -     | 0.181 | 0.063 | 1.924 | 96.456 | 1.680 | 1.467 | 2.850 | 924 |
| <b>amp5-2</b>                 | 11.82 | 43.44 | 0.73  | 10.58 | - | 13.62 | 2.236 | 12.99 | -     | 0.213 | -     | 1.662 | 97.282 | 1.663 | 1.560 | 2.841 | 913 |
| <b>amp6</b>                   | 11.91 | 43.21 | 0.794 | 10.88 | - | 14.28 | 2.209 | 12.24 | -     | 0.205 | -     | 1.916 | 97.638 | 1.716 | 1.678 | 2.685 | 909 |
| <b>amp7</b>                   | 11.15 | 43.36 | 0.77  | 10.89 | - | 13.44 | 2.151 | 12.12 | 0.004 | 0.212 | 0.006 | 2.04  | 96.152 | 1.742 | 1.636 | 2.698 | 898 |
| <b>amp8</b>                   | 12.43 | 42.92 | 0.802 | 10.82 | - | 12.9  | 2.305 | 12.82 | -     | 0.189 | -     | 1.687 | 96.859 | 1.708 | 1.507 | 2.818 | 925 |

---

Note: <sup>\$</sup>Cationic coefficient calculated with cation number of 4. The calculation is used by the price difference method.

<sup>&</sup>Cationic coefficient calculated with cation number of 6. The specific calculation method referenced by Leak et al., (1997).

---

**Table S3: The geochemistry analysis results for the Neoproterozoic adakitic and mafic pluton in the western margin of the Yangtze Block**

| Location                       | Yaunmou pluton |          |          |          |          |          |          |          | Dajianshan pluton   |         |         |         |         |         |         |
|--------------------------------|----------------|----------|----------|----------|----------|----------|----------|----------|---------------------|---------|---------|---------|---------|---------|---------|
| Sample                         | JLW16-41       | JLW16-42 | JLW16-43 | JLW16-44 | JWL16-45 | JLW16-48 | JLW16-49 | JWL16-50 | DJS-2-1             | DJS-2-2 | DJS-2-3 | DJS-2-4 | DJS-2-5 | DJS-2-6 | DJS-2-7 |
| Rock type                      | Adakitic rock  |          |          |          |          |          |          |          | Adakitic rock       |         |         |         |         |         |         |
| Reference                      | This study     |          |          |          |          |          |          |          | Zhu Yu et al., 2019 |         |         |         |         |         |         |
| Age(Ma)                        | 811            |          |          |          |          |          |          |          | 800                 |         |         |         |         |         |         |
| Major(wt.%)                    |                |          |          |          |          |          |          |          |                     |         |         |         |         |         |         |
| SiO <sub>2</sub>               | 63.39          | 65.80    | 66.65    | 67.46    | 66.05    | 66.47    | 62.78    | 65.84    | 74.62               | 74.73   | 74.08   | 74.60   | 74.82   | 74.32   | 74.46   |
| TiO <sub>2</sub>               | 0.45           | 0.48     | 0.45     | 0.38     | 0.48     | 0.50     | 0.58     | 0.49     | 0.10                | 0.11    | 0.09    | 0.10    | 0.11    | 0.10    | 0.13    |
| Al <sub>2</sub> O <sub>3</sub> | 13.14          | 15.94    | 15.95    | 15.17    | 16.25    | 14.63    | 16.77    | 15.91    | 13.85               | 14.32   | 14.70   | 14.52   | 13.97   | 14.25   | 14.11   |
| Fe2O3T                         | 3.32           | 3.77     | 3.33     | 2.94     | 3.74     | 3.64     | 4.78     | 3.86     | 1.04                | 1.10    | 0.86    | 1.12    | 1.08    | 0.98    | 1.16    |
| Fe <sub>2</sub> O <sub>3</sub> |                |          |          |          |          |          |          |          |                     |         |         |         |         |         |         |
| FeO                            |                |          |          |          |          |          |          |          |                     |         |         |         |         |         |         |
| MnO                            | 0.09           | 0.08     | 0.08     | 0.07     | 0.08     | 0.07     | 0.11     | 0.09     | 0.04                | 0.05    | 0.03    | 0.04    | 0.04    | 0.04    | 0.05    |
| MgO                            | 1.28           | 1.23     | 1.30     | 1.11     | 1.26     | 1.48     | 1.66     | 1.56     | 0.28                | 0.29    | 0.25    | 0.27    | 0.29    | 0.29    | 0.30    |
| CaO                            | 6.65           | 3.50     | 2.69     | 1.98     | 3.51     | 2.23     | 2.89     | 2.34     | 1.49                | 1.66    | 1.79    | 1.41    | 1.48    | 1.50    | 1.53    |
| Na <sub>2</sub> O              | 4.88           | 4.89     | 4.96     | 5.76     | 4.93     | 6.22     | 5.23     | 4.76     | 4.76                | 5.16    | 5.06    | 5.50    | 5.60    | 5.07    | 4.92    |
| K <sub>2</sub> O               | 1.76           | 1.85     | 1.88     | 2.43     | 1.82     | 1.35     | 2.49     | 2.08     | 2.39                | 1.82    | 2.31    | 1.13    | 1.04    | 2.36    | 2.19    |
| P <sub>2</sub> O <sub>5</sub>  | 0.14           | 0.16     | 0.15     | 0.14     | 0.16     | 0.17     | 0.19     | 0.16     | 0.04                | 0.09    | 0.03    | 0.04    | 0.04    | 0.04    | 0.05    |
| LOI                            | 5.25           | 1.33     | 1.62     | 1.73     | 0.53     | 1.74     | 1.71     | 1.89     | 1.06                | 0.84    | 1.06    | 0.97    | 1.15    | 0.85    | 0.84    |
| TOL                            | 100.33         | 99.03    | 99.04    | 99.17    | 98.79    | 98.49    | 99.19    | 98.97    | 99.67               | 100.17  | 100.26  | 99.70   | 99.62   | 99.80   | 99.74   |
| Trace(ppm)                     |                |          |          |          |          |          |          |          |                     |         |         |         |         |         |         |
| Li                             | 14.0           | 14.7     | 14.5     | 14.8     | 10.8     | 15.1     | 15.8     | 18.0     | 4.85                | 4.64    | 3.91    | 4.90    | 4.83    | 4.52    | 5.46    |
| Be                             | 1.75           | 2.03     | 1.73     | 2.06     | 2.21     | 1.18     | 2.26     | 2.18     | 1.65                | 1.83    | 1.74    | 1.57    | 1.60    | 1.71    | 1.82    |
| Sc                             | 6.13           | 6.92     | 5.90     | 5.39     | 7.02     | 5.54     | 8.76     | 5.34     | 2.14                | 2.03    | 1.64    | 1.94    | 2.06    | 2.04    | 2.30    |
| V                              | 78.1           | 86.4     | 85.1     | 79.8     | 93.7     | 75.1     | 124      | 102      | 5.30                | 5.12    | 4.25    | 5.24    | 5.26    | 4.96    | 5.91    |
| Cr                             | 126            | 147      | 138      | 138      | 143      | 138      | 143      | 141      | 3.52                | 3.36    | 2.94    | 3.00    | 3.27    | 3.16    | 3.59    |
| Co                             |                |          |          |          |          |          |          |          |                     |         |         |         |         |         |         |
| Ni                             | 3.20           | 13.5     | 11.5     | 11.0     | 12.1     | 7.42     | 8.76     | 8.85     | 1.39                | 1.55    | 1.36    | 1.32    | 1.46    | 1.35    | 1.53    |
| Cu                             | 2.52           | 2.88     | 2.84     | 1.85     | 2.96     | 2.45     | 24.8     | 13.5     | 2.73                | 2.07    | 1.83    | 2.43    | 2.68    | 2.25    | 3.36    |
| Zn                             | 86.4           | 62.6     | 60.4     | 50.7     | 69.2     | 49.7     | 82.7     | 76.7     | 28.2                | 25.3    | 21.7    | 24.3    | 25.8    | 25.9    | 31.5    |



**Table S3: The geochemistry analysis results for the Neoproterozoic adakitic and mafic pluton in the western margin of the Yangtze Block**

| Location  | Yaunmou pluton |          |          |          |          |          |          |          | Dajianshan pluton   |         |         |         |         |         |         |
|-----------|----------------|----------|----------|----------|----------|----------|----------|----------|---------------------|---------|---------|---------|---------|---------|---------|
| Sample    | JLW16-41       | JLW16-42 | JLW16-43 | JLW16-44 | JWL16-45 | JLW16-48 | JLW16-49 | JWL16-50 | DJS-2-1             | DJS-2-2 | DJS-2-3 | DJS-2-4 | DJS-2-5 | DJS-2-6 | DJS-2-7 |
| Rock type | Adakitic rock  |          |          |          |          |          |          |          | Adakitic rock       |         |         |         |         |         |         |
| Reference | This study     |          |          |          |          |          |          |          | Zhu Yu et al., 2019 |         |         |         |         |         |         |
| Age(Ma)   | 811            |          |          |          |          |          |          |          | 800                 |         |         |         |         |         |         |
| Ga        | 15.6           | 18.9     | 19.4     | 16.2     | 20.4     | 12.9     | 21.2     | 19.5     | 12.9                | 13.8    | 13.3    | 13.6    | 13.2    | 13.4    | 14.0    |
| Ge        |                |          |          |          |          |          |          |          |                     |         |         |         |         |         |         |
| Rb        | 25.4           | 20.0     | 21.4     | 34.8     | 28.3     | 20.7     | 32.8     | 35.9     | 29.9                | 26.4    | 28.6    | 20.5    | 19.0    | 30.0    | 30.2    |
| Sr        | 208            | 338      | 335      | 194      | 327      | 141      | 354      | 399      | 347                 | 395     | 382     | 341     | 335     | 371     | 378     |
| Y         | 9.41           | 7.10     | 6.83     | 7.37     | 8.66     | 8.13     | 16.1     | 9.25     | 8.26                | 8.62    | 7.04    | 7.13    | 7.90    | 7.97    | 9.71    |
| Zr        | 224            | 226      | 216      | 241      | 247      | 192      | 250      | 247      | 99.0                | 98.5    | 88.0    | 90.0    | 93.9    | 90.3    | 105     |
| Nb        | 6.42           | 4.86     | 5.11     | 5.18     | 5.27     | 3.76     | 8.34     | 5.26     | 4.69                | 5.61    | 3.84    | 4.36    | 4.52    | 4.32    | 5.79    |
| Sn        |                |          |          |          |          |          |          |          |                     |         |         |         |         |         |         |
| Cs        | 0.73           | 1.07     | 0.84     | 0.93     | 0.86     | 0.70     | 0.85     | 1.65     | 0.27                | 0.28    | 0.24    | 0.22    | 0.22    | 0.24    | 0.28    |
| Ba        | 447            | 535      | 567      | 1020     | 646      | 349      | 969      | 602      | 1730                | 1270    | 1510    | 572     | 456     | 1590    | 1550    |
| La        | 46.2           | 54.0     | 45.4     | 51.9     | 32.2     | 45.1     | 41.5     | 46.7     | 14.0                | 17.5    | 14.5    | 16.2    | 15.9    | 17.6    | 16.2    |
| Ce        | 88.0           | 89.6     | 77.2     | 90.4     | 60.2     | 70.5     | 73.0     | 73.7     | 26.0                | 32.6    | 26.4    | 30.0    | 29.6    | 32.6    | 30.7    |
| Pr        | 8.45           | 8.89     | 7.70     | 8.90     | 6.32     | 6.95     | 8.02     | 7.27     | 2.71                | 3.39    | 2.74    | 3.12    | 3.11    | 3.41    | 3.21    |
| Nd        | 27.8           | 27.6     | 24.0     | 27.8     | 23.2     | 22.1     | 27.6     | 23.2     | 9.47                | 11.8    | 9.54    | 10.9    | 10.8    | 11.9    | 11.2    |
| Sm        | 3.80           | 2.98     | 2.89     | 3.33     | 3.32     | 2.72     | 4.24     | 2.91     | 1.59                | 1.94    | 1.55    | 1.76    | 1.78    | 1.95    | 1.87    |
| Eu        | 0.94           | 0.94     | 0.89     | 0.99     | 1.15     | 0.89     | 1.04     | 0.80     | 0.66                | 0.71    | 0.68    | 0.62    | 0.58    | 0.71    | 0.69    |
| Gd        | 4.01           | 3.27     | 2.87     | 3.43     | 3.38     | 2.85     | 4.28     | 3.02     | 1.45                | 1.69    | 1.38    | 1.49    | 1.53    | 1.65    | 1.68    |
| Tb        | 0.46           | 0.37     | 0.31     | 0.37     | 0.43     | 0.31     | 0.58     | 0.37     | 0.21                | 0.25    | 0.19    | 0.21    | 0.22    | 0.23    | 0.25    |
| Dy        | 2.45           | 1.70     | 1.55     | 1.77     | 2.13     | 1.66     | 3.26     | 1.82     | 1.32                | 1.47    | 1.17    | 1.21    | 1.32    | 1.34    | 1.56    |
| Ho        | 0.39           | 0.30     | 0.25     | 0.29     | 0.35     | 0.28     | 0.62     | 0.34     | 0.28                | 0.30    | 0.24    | 0.25    | 0.27    | 0.27    | 0.33    |
| Er        | 1.20           | 0.89     | 0.82     | 0.95     | 1.09     | 0.95     | 1.86     | 1.16     | 0.83                | 0.88    | 0.72    | 0.73    | 0.81    | 0.81    | 0.99    |
| Tm        | 0.17           | 0.13     | 0.12     | 0.13     | 0.14     | 0.15     | 0.28     | 0.14     | 0.13                | 0.14    | 0.11    | 0.11    | 0.12    | 0.13    | 0.16    |
| Yb        | 1.18           | 0.74     | 0.81     | 0.90     | 0.92     | 1.00     | 1.82     | 1.20     | 0.92                | 0.95    | 0.78    | 0.81    | 0.88    | 0.87    | 1.08    |
| Lu        | 0.19           | 0.15     | 0.13     | 0.15     | 0.18     | 0.16     | 0.28     | 0.19     | 0.14                | 0.15    | 0.12    | 0.13    | 0.14    | 0.14    | 0.17    |
| Hf        | 5.94           | 6.58     | 6.25     | 6.70     | 6.70     | 5.11     | 6.52     | 6.56     | 2.52                | 2.47    | 2.21    | 2.29    | 2.35    | 2.29    | 2.65    |
| Ta        | 0.34           | 0.43     | 0.42     | 0.42     | 0.46     | 0.30     | 0.68     | 0.47     | 0.60                | 0.71    | 0.54    | 0.56    | 0.59    | 0.58    | 0.71    |

**Table S3: The geochemistry analysis results for the Neoproterozoic adakitic and mafic pluton in the western margin of the Yangtze Block**

| Yaunmou pluton                      |               |          |          |          |          |          |          |          | Dajianshan pluton   |         |         |         |         |         |         |
|-------------------------------------|---------------|----------|----------|----------|----------|----------|----------|----------|---------------------|---------|---------|---------|---------|---------|---------|
| Location                            |               |          |          |          |          |          |          |          |                     |         |         |         |         |         |         |
| Sample                              | JLW16-41      | JLW16-42 | JLW16-43 | JLW16-44 | JWL16-45 | JLW16-48 | JLW16-49 | JWL16-50 | DJS-2-1             | DJS-2-2 | DJS-2-3 | DJS-2-4 | DJS-2-5 | DJS-2-6 | DJS-2-7 |
| Rock type                           | Adakitic rock |          |          |          |          |          |          |          | Adakitic rock       |         |         |         |         |         |         |
| Reference                           | This study    |          |          |          |          |          |          |          | Zhu Yu et al., 2019 |         |         |         |         |         |         |
| Age(Ma)                             | 811           |          |          |          |          |          |          |          | 800                 |         |         |         |         |         |         |
| Pb                                  | 8.71          | 7.60     | 7.18     | 7.42     | 8.59     | 4.61     | 16.5     | 12.7     | 25.5                | 13.0    | 14.8    | 8.75    | 11.6    | 15.9    | 15.9    |
| Th                                  | 9.28          | 8.75     | 7.56     | 7.71     | 5.13     | 6.41     | 6.17     | 7.80     | 1.91                | 2.30    | 1.64    | 2.07    | 2.09    | 2.24    | 2.15    |
| U                                   | 1.22          | 0.86     | 0.91     | 1.02     | 1.09     | 0.72     | 1.10     | 1.10     | 0.32                | 0.40    | 0.30    | 0.30    | 0.30    | 0.36    | 0.32    |
|                                     |               |          |          |          |          |          |          |          |                     |         |         |         |         |         |         |
| Isotopic date                       |               |          |          |          |          |          |          |          |                     |         |         |         |         |         |         |
| $^{87}\text{Sr}/^{86}\text{Sr}$ (t) |               |          |          |          |          |          |          |          |                     |         |         |         |         |         |         |
| $\epsilon_{\text{Nd}}$ (t)          |               |          |          |          |          |          |          |          |                     |         |         |         |         |         |         |
|                                     |               |          |          |          |          |          |          |          |                     |         |         |         |         |         |         |
| Ratio                               |               |          |          |          |          |          |          |          |                     |         |         |         |         |         |         |
| Mg#                                 | 47.3          | 43.2     | 47.6     | 46.7     | 44.0     | 48.7     | 44.7     | 48.5     | 38.6                | 38.1    | 40.4    | 36.0    | 38.5    | 40.8    | 37.6    |
| Sr/Y                                | 22.1          | 47.6     | 49.0     | 26.3     | 37.7     | 17.4     | 21.9     | 43.2     | 42.0                | 45.9    | 54.3    | 47.9    | 42.4    | 46.6    | 38.9    |
| Nb/La                               | 0.14          | 0.09     | 0.11     | 0.10     | 0.16     | 0.08     | 0.20     | 0.11     | 0.33                | 0.32    | 0.27    | 0.27    | 0.28    | 0.25    | 0.36    |
| Nb/U                                | 5.28          | 5.64     | 5.63     | 5.09     | 4.83     | 5.25     | 7.61     | 4.76     | 14.7                | 14.0    | 12.8    | 14.5    | 15.1    | 12.0    | 18.1    |

Table S3: Continued

| Location                       | Mopanshan pluton   |         |         |         |         |         |         |          |          |          |          |          |         |         |          |          |
|--------------------------------|--------------------|---------|---------|---------|---------|---------|---------|----------|----------|----------|----------|----------|---------|---------|----------|----------|
| Sample                         | MPS05-1            | MPS05-2 | MPS05-3 | MPS05-4 | MPS05-5 | MPS05-6 | MPS06-6 | MPS06-14 | MPS06-15 | MPS06-16 | MPS06-17 | MPS06-19 | MPS06-8 | MPS06-9 | MPS06-10 | MPS06-11 |
| Rock type                      | Adakitic rock      |         |         |         |         |         |         |          |          |          |          |          |         |         |          |          |
| Reference                      | Huang et al., 2009 |         |         |         |         |         |         |          |          |          |          |          |         |         |          |          |
| Age(Ma)                        | 782                |         |         |         |         |         |         |          |          |          |          |          |         |         |          |          |
| Major(wt.%)                    |                    |         |         |         |         |         |         |          |          |          |          |          |         |         |          |          |
| SiO <sub>2</sub>               | 65.26              | 65.24   | 65.83   | 65.33   | 66.07   | 65.23   | 65.55   | 68.86    | 68.34    | 68.55    | 68.86    | 63.92    | 67.97   | 67.92   | 69.69    | 66.51    |
| TiO <sub>2</sub>               | 0.60               | 0.60    | 0.51    | 0.51    | 0.48    | 0.57    | 0.50    | 0.32     | 0.34     | 0.32     | 0.35     | 0.55     | 0.39    | 0.39    | 0.32     | 0.44     |
| Al <sub>2</sub> O <sub>3</sub> | 17.06              | 17.07   | 16.65   | 16.75   | 16.65   | 16.84   | 16.69   | 16.25    | 16.32    | 16.03    | 16.03    | 16.94    | 16.02   | 16.09   | 15.84    | 16.57    |
| Fe2O3T                         | 3.74               | 3.73    | 3.54    | 3.32    | 3.98    | 3.67    | 3.75    | 2.90     | 2.88     | 3.09     | 2.81     | 4.47     | 2.88    | 2.99    | 2.93     | 3.59     |
| Fe <sub>2</sub> O <sub>3</sub> |                    |         |         |         |         |         |         |          |          |          |          |          |         |         |          |          |
| FeO                            |                    |         |         |         |         |         |         |          |          |          |          |          |         |         |          |          |
| MnO                            | 0.06               | 0.05    | 0.05    | 0.05    | 0.05    | 0.05    | 0.06    | 0.05     | 0.11     | 0.05     | 0.06     | 0.07     | 0.06    | 0.05    | 0.06     | 0.05     |
| MgO                            | 1.75               | 1.79    | 1.55    | 1.24    | 1.75    | 1.69    | 1.55    | 1.08     | 1.13     | 0.92     | 1.06     | 2.14     | 1.19    | 1.18    | 0.88     | 1.25     |
| CaO                            | 3.78               | 3.20    | 4.27    | 5.45    | 4.41    | 2.89    | 4.24    | 4.00     | 3.98     | 3.69     | 3.49     | 4.54     | 3.52    | 3.60    | 3.45     | 4.09     |
| Na <sub>2</sub> O              | 3.87               | 4.07    | 3.73    | 3.79    | 3.85    | 4.22    | 4.00    | 4.13     | 4.04     | 4.02     | 3.97     | 4.03     | 3.96    | 3.86    | 3.86     | 3.89     |
| K <sub>2</sub> O               | 2.12               | 2.23    | 2.31    | 1.90    | 1.93    | 2.47    | 2.40    | 1.56     | 1.66     | 2.06     | 2.42     | 2.14     | 2.73    | 2.69    | 2.37     | 2.34     |
| P <sub>2</sub> O <sub>5</sub>  | 0.16               | 0.16    | 0.13    | 0.13    | 0.14    | 0.16    | 0.13    | 0.12     | 0.12     | 0.12     | 0.11     | 0.15     | 0.11    | 0.12    | 0.11     | 0.13     |
| LOI                            | 1.56               | 1.88    | 0.85    | 1.51    | 0.99    | 1.87    | 0.96    | 0.71     | 0.71     | 0.50     | 1.06     | 1.55     | 1.29    | 0.78    | 0.61     | 0.60     |
| TOL                            | 99.95              | 100.02  | 99.42   | 99.97   | 97.37   | 99.67   | 99.83   | 99.97    | 99.61    | 99.33    | 100.20   | 100.49   | 100.12  | 99.67   | 100.12   | 99.46    |
| Trace(ppm)                     |                    |         |         |         |         |         |         |          |          |          |          |          |         |         |          |          |
| Li                             |                    |         |         |         |         |         |         |          |          |          |          |          |         |         |          |          |
| Be                             |                    |         |         |         |         |         |         |          |          |          |          |          |         |         |          |          |
| Sc                             |                    |         |         |         |         |         |         |          |          |          |          |          |         |         |          |          |
| V                              |                    |         |         |         |         |         |         |          |          |          |          |          |         |         |          |          |
| Cr                             | 21.0               | 15.8    | 15.9    | 16.5    | 31.1    | 13.7    | 22.9    | 10.8     | 8.99     | 6.27     | 8.02     | 27.3     | 22.7    | 19.0    | 5.21     | 11.9     |
| Co                             |                    |         |         |         |         |         |         |          |          |          |          |          |         |         |          |          |
| Ni                             | 7.65               | 6.02    | 4.87    | 5.56    | 11.6    | 4.37    | 11.5    | 3.41     | 3.12     | 1.64     | 1.69     | 11.0     | 8.01    | 5.08    | 2.20     | 3.63     |
| Cu                             |                    |         |         |         |         |         |         |          |          |          |          |          |         |         |          |          |
| Zn                             |                    |         |         |         |         |         |         |          |          |          |          |          |         |         |          |          |

Table S3: Continued

| Mopanshan pluton |                    |         |         |         |         |         |         |          |          |          |          |          |         |         |          |          |
|------------------|--------------------|---------|---------|---------|---------|---------|---------|----------|----------|----------|----------|----------|---------|---------|----------|----------|
| Location         |                    |         |         |         |         |         |         |          |          |          |          |          |         |         |          |          |
| Sample           | MPS05-1            | MPS05-2 | MPS05-3 | MPS05-4 | MPS05-5 | MPS05-6 | MPS06-6 | MPS06-14 | MPS06-15 | MPS06-16 | MPS06-17 | MPS06-19 | MPS06-8 | MPS06-9 | MPS06-10 | MPS06-11 |
| Rock type        | Adakitic rock      |         |         |         |         |         |         |          |          |          |          |          |         |         |          |          |
| Reference        | Huang et al., 2009 |         |         |         |         |         |         |          |          |          |          |          |         |         |          |          |
| Age(Ma)          | 782                |         |         |         |         |         |         |          |          |          |          |          |         |         |          |          |
| Ga               | 19.8               | 20.5    | 20.8    | 20.0    | 19.6    | 19.9    | 19.3    | 18.3     | 19.9     | 19.2     | 18.7     | 21.6     | 19.1    | 18.4    | 18.3     | 20.6     |
| Ge               |                    |         |         |         |         |         |         |          |          |          |          |          |         |         |          |          |
| Rb               | 50.8               | 61.6    | 70.8    | 63.5    | 66.0    | 57.3    | 58.4    | 35.7     | 56.0     | 51.3     | 50.3     | 57.2     | 71.5    | 68.2    | 59.8     | 64.4     |
| Sr               | 422                | 422     | 383     | 454     | 577     | 419     | 362     | 322      | 319      | 319      | 316      | 482      | 348     | 311     | 314      | 325      |
| Y                | 10.8               | 10.6    | 11.3    | 6.06    | 8.96    | 9.79    | 9.93    | 7.64     | 8.18     | 9.33     | 9.34     | 12.8     | 10.8    | 16.6    | 10.1     | 13.0     |
| Zr               | 161                | 163     | 195     | 143     | 165     | 184     | 166     | 117      | 123      | 128      | 135      | 133      | 172     | 136     | 157      | 75.9     |
| Nb               | 4.72               | 4.53    | 4.53    | 3.56    | 4.80    | 4.46    | 4.34    | 3.21     | 3.40     | 4.01     | 3.94     | 5.11     | 5.62    | 5.58    | 4.33     | 5.11     |
| Sn               |                    |         |         |         |         |         |         |          |          |          |          |          |         |         |          |          |
| Cs               |                    |         |         |         |         |         |         |          |          |          |          |          |         |         |          |          |
| Ba               | 652                | 651     | 693     | 553     | 624     | 745     | 736     | 562      | 525      | 693      | 688      | 703      | 651     | 719     | 920      | 714      |
| La               | 28.9               | 25.4    | 32.3    | 35.4    | 27.8    | 28.5    | 23.1    | 19.5     | 21.4     | 35.3     | 39.1     | 44.1     | 33.8    | 25.8    | 30.4     | 34.2     |
| Ce               | 55.3               | 50.7    | 62.2    | 65.5    | 50.4    | 56.6    | 47.2    | 39.3     | 42.4     | 68.6     | 76.3     | 84.6     | 65.6    | 52.1    | 60.0     | 67.4     |
| Pr               | 6.58               | 6.27    | 7.38    | 7.25    | 5.59    | 6.70    | 5.64    | 4.57     | 5.00     | 7.66     | 8.41     | 9.17     | 7.24    | 6.30    | 6.64     | 7.63     |
| Nd               | 24.0               | 22.8    | 25.8    | 23.6    | 19.0    | 24.2    | 20.9    | 16.5     | 17.9     | 26.2     | 28.5     | 30.8     | 24.3    | 23.8    | 22.8     | 26.9     |
| Sm               | 3.95               | 3.85    | 4.05    | 3.03    | 3.05    | 4.03    | 3.60    | 2.69     | 3.01     | 3.82     | 4.06     | 4.77     | 3.66    | 4.95    | 3.53     | 4.33     |
| Eu               | 1.02               | 1.07    | 0.99    | 0.91    | 0.78    | 1.10    | 0.92    | 0.85     | 0.89     | 0.88     | 0.89     | 1.04     | 0.82    | 0.98    | 0.83     | 0.96     |
| Gd               | 3.07               | 3.04    | 3.07    | 2.04    | 1.92    | 3.11    | 2.89    | 2.17     | 2.29     | 2.83     | 3.08     | 3.87     | 2.96    | 4.26    | 2.77     | 3.45     |
| Tb               | 0.43               | 0.41    | 0.44    | 0.25    | 0.31    | 0.40    | 0.40    | 0.29     | 0.32     | 0.36     | 0.38     | 0.50     | 0.37    | 0.67    | 0.37     | 0.48     |
| Dy               | 2.22               | 2.18    | 2.29    | 1.20    | 1.51    | 2.04    | 2.05    | 1.58     | 1.71     | 1.89     | 1.95     | 2.65     | 2.02    | 3.61    | 2.01     | 2.57     |
| Ho               | 0.40               | 0.40    | 0.43    | 0.22    | 0.32    | 0.40    | 0.40    | 0.32     | 0.33     | 0.38     | 0.40     | 0.52     | 0.40    | 0.70    | 0.41     | 0.51     |
| Er               | 1.08               | 1.05    | 1.16    | 0.63    | 0.85    | 1.00    | 1.01    | 0.83     | 0.85     | 1.00     | 1.00     | 1.35     | 1.09    | 1.72    | 1.07     | 1.33     |
| Tm               | 0.14               | 0.14    | 0.15    | 0.08    | 0.12    | 0.14    | 0.14    | 0.12     | 0.13     | 0.15     | 0.15     | 0.20     | 0.17    | 0.25    | 0.16     | 0.20     |
| Yb               | 0.87               | 0.85    | 1.02    | 0.54    | 0.80    | 0.92    | 0.91    | 0.76     | 0.80     | 1.01     | 1.02     | 1.29     | 1.13    | 1.46    | 1.03     | 1.21     |
| Lu               | 0.13               | 0.13    | 0.16    | 0.09    | 0.13    | 0.14    | 0.15    | 0.12     | 0.13     | 0.16     | 0.18     | 0.20     | 0.19    | 0.20    | 0.16     | 0.19     |
| Hf               | 4.38               | 4.53    | 5.76    | 3.93    | 3.72    | 4.81    | 4.28    | 3.22     | 3.46     | 3.63     | 3.98     | 3.83     | 4.93    | 3.68    | 4.22     | 2.33     |
| Ta               | 0.33               | 0.29    | 0.32    | 0.18    | 0.24    | 0.31    | 0.29    | 0.22     | 0.25     | 0.31     | 0.32     | 0.38     | 0.48    | 0.57    | 0.27     | 0.40     |

Table S3: Continued

| Location                            |          |         |          |          |          |         |         |          |          |          |          |          |         |         |          |          |
|-------------------------------------|----------|---------|----------|----------|----------|---------|---------|----------|----------|----------|----------|----------|---------|---------|----------|----------|
| Mopanshan pluton                    |          |         |          |          |          |         |         |          |          |          |          |          |         |         |          |          |
| Sample                              | MPS05-1  | MPS05-2 | MPS05-3  | MPS05-4  | MPS05-5  | MPS05-6 | MPS06-6 | MPS06-14 | MPS06-15 | MPS06-16 | MPS06-17 | MPS06-19 | MPS06-8 | MPS06-9 | MPS06-10 | MPS06-11 |
| Rock type                           |          |         |          |          |          |         |         |          |          |          |          |          |         |         |          |          |
| Adakitic rock                       |          |         |          |          |          |         |         |          |          |          |          |          |         |         |          |          |
| Reference                           |          |         |          |          |          |         |         |          |          |          |          |          |         |         |          |          |
| Huang et al., 2009                  |          |         |          |          |          |         |         |          |          |          |          |          |         |         |          |          |
| Age(Ma)                             | 782      |         |          |          |          |         |         |          |          |          |          |          |         |         |          |          |
| Pb                                  | 10.4     | 8.62    | 10.2     | 7.02     | 12.3     | 11.5    | 10.1    | 5.30     | 5.60     | 10.9     | 10.6     | 15.1     | 14.4    | 11.4    | 12.4     | 11.1     |
| Th                                  | 4.65     | 4.41    | 6.01     | 6.18     | 5.87     | 5.74    | 5.51    | 3.90     | 4.15     | 7.05     | 8.12     | 9.79     | 10.3    | 6.46    | 6.47     | 7.46     |
| U                                   | 0.76     | 0.85    | 1.10     | 0.98     | 0.98     | 0.97    | 0.99    | 0.57     | 0.62     | 0.88     | 0.91     | 1.34     | 1.78    | 0.68    | 0.47     | 1.30     |
| Isotopic date                       |          |         |          |          |          |         |         |          |          |          |          |          |         |         |          |          |
| $^{87}\text{Sr}/^{86}\text{Sr}$ (t) | 0.704957 |         | 0.704275 | 0.705447 | 0.705649 |         |         |          |          |          |          |          |         |         |          |          |
| $\epsilon_{\text{Nd}}$ (t)          | -0.54    |         | -2.06    | -0.43    | -1.92    |         |         |          |          |          |          |          |         |         |          |          |
| Ratio                               |          |         |          |          |          |         |         |          |          |          |          |          |         |         |          |          |
| Mg#                                 | 52.2     | 52.8    | 50.5     | 46.5     | 50.6     | 51.8    | 49.1    | 46.5     | 47.8     | 41.0     | 46.8     | 52.7     | 49.1    | 47.9    | 41.2     | 44.8     |
| Sr/Y                                | 39.1     | 39.8    | 33.9     | 74.9     | 64.4     | 42.8    | 36.5    | 42.1     | 39.0     | 34.2     | 33.8     | 37.7     | 32.2    | 18.7    | 31.1     | 25.0     |
| Nb/La                               | 0.16     | 0.18    | 0.14     | 0.10     | 0.17     | 0.16    | 0.19    | 0.16     | 0.16     | 0.11     | 0.10     | 0.12     | 0.17    | 0.22    | 0.14     | 0.15     |
| Nb/U                                | 6.21     | 5.33    | 4.12     | 3.63     | 4.90     | 4.60    | 4.38    | 5.63     | 5.48     | 4.56     | 4.33     | 3.81     | 3.16    | 8.21    | 9.21     | 3.93     |

| Location                       |       |       |       |       |       |       |       |       |       |       |       |       |       |       |       |       |
|--------------------------------|-------|-------|-------|-------|-------|-------|-------|-------|-------|-------|-------|-------|-------|-------|-------|-------|
| Sample                         | DT-02 | DT-04 | DT-05 | DT-06 | DT-07 | DT-08 | DT-09 | DT-10 | DT-12 | DT-13 | DT-14 | DT-15 | DT-16 | DT-18 | DT-19 | DT-20 |
| Rock type                      |       |       |       |       |       |       |       |       |       |       |       |       |       |       |       |       |
| Reference                      |       |       |       |       |       |       |       |       |       |       |       |       |       |       |       |       |
| Age(Ma)                        |       |       |       |       |       |       |       |       |       |       |       |       |       |       |       |       |
| Major(wt.%)                    |       |       |       |       |       |       |       |       |       |       |       |       |       |       |       |       |
| SiO <sub>2</sub>               | 65.50 | 64.21 | 65.25 | 62.63 | 62.50 | 62.44 | 63.28 | 62.84 | 63.98 | 62.84 | 62.08 | 62.75 | 62.60 | 63.76 | 62.87 | 61.32 |
| TiO <sub>2</sub>               | 0.37  | 0.40  | 0.40  | 0.45  | 0.48  | 0.47  | 0.47  | 0.49  | 0.44  | 0.47  | 0.49  | 0.47  | 0.46  | 0.47  | 0.48  | 0.53  |
| Al <sub>2</sub> O <sub>3</sub> | 16.69 | 16.97 | 16.79 | 17.34 | 17.16 | 17.20 | 17.04 | 16.92 | 17.30 | 17.52 | 17.48 | 16.97 | 17.15 | 16.52 | 17.27 | 17.17 |
| Fe2O3T                         | 3.26  | 3.58  | 3.44  | 4.13  | 4.38  | 4.14  | 4.15  | 4.49  | 3.75  | 4.18  | 4.27  | 4.07  | 4.02  | 4.07  | 4.14  | 4.80  |
| Fe <sub>2</sub> O <sub>3</sub> |       |       |       |       |       |       |       |       |       |       |       |       |       |       |       |       |
| FeO                            |       |       |       |       |       |       |       |       |       |       |       |       |       |       |       |       |
| MnO                            | 0.05  | 0.06  | 0.06  | 0.07  | 0.07  | 0.06  | 0.06  | 0.07  | 0.05  | 0.07  | 0.07  | 0.06  | 0.06  | 0.07  | 0.06  | 0.07  |
| MgO                            | 1.55  | 1.61  | 1.60  | 1.96  | 2.18  | 2.11  | 1.96  | 2.11  | 1.71  | 1.99  | 2.12  | 2.08  | 2.10  | 2.13  | 2.17  | 2.60  |
| CaO                            | 4.15  | 4.40  | 4.29  | 4.78  | 5.13  | 4.99  | 4.64  | 4.77  | 4.60  | 4.81  | 5.11  | 4.88  | 5.09  | 4.87  | 5.18  | 5.34  |
| Na <sub>2</sub> O              | 4.04  | 4.14  | 4.25  | 4.15  | 4.05  | 4.00  | 3.98  | 3.98  | 4.05  | 4.18  | 4.18  | 3.94  | 4.06  | 3.85  | 3.98  | 3.46  |
| K <sub>2</sub> O               | 2.14  | 2.15  | 1.89  | 2.08  | 1.79  | 2.05  | 2.18  | 2.04  | 2.20  | 1.79  | 1.88  | 2.27  | 1.91  | 2.09  | 1.85  | 2.17  |
| P <sub>2</sub> O <sub>5</sub>  | 0.11  | 0.13  | 0.13  | 0.14  | 0.14  | 0.14  | 0.14  | 0.15  | 0.14  | 0.15  | 0.15  | 0.14  | 0.14  | 0.12  | 0.14  | 0.16  |
| LOI                            | 1.09  | 1.19  | 1.03  | 0.91  | 1.04  | 1.03  | 0.97  | 1.01  | 0.87  | 0.84  | 0.94  | 1.07  | 1.07  | 1.02  | 0.90  | 1.03  |
| TOL                            | 98.96 | 98.83 | 99.13 | 98.62 | 98.91 | 98.64 | 98.87 | 98.87 | 99.09 | 98.84 | 98.76 | 98.69 | 98.67 | 98.98 | 99.04 | 98.67 |
| Trace(ppm)                     |       |       |       |       |       |       |       |       |       |       |       |       |       |       |       |       |
| Li                             |       |       |       |       |       |       |       |       |       |       |       |       |       |       |       |       |
| Be                             |       |       |       |       |       |       |       |       |       |       |       |       |       |       |       |       |
| Sc                             | 9.30  | 10.3  | 9.02  | 10.8  | 11.4  | 10.5  | 10.0  | 10.4  | 8.63  | 9.10  | 10.2  | 9.41  | 10.3  | 10.4  | 11.0  | 13.9  |
| V                              | 47.6  | 51.0  | 49.1  | 63.5  | 71.9  | 66.5  | 62.0  | 65.5  | 54.3  | 59.3  | 60.5  | 59.8  | 59.5  | 64.7  | 69.0  | 83.2  |
| Cr                             | 19.3  | 21.5  | 17.7  | 26.3  | 30.6  | 28.1  | 25.3  | 28.6  | 17.9  | 20.0  | 25.6  | 25.5  | 25.9  | 32.8  | 31.5  | 37.4  |
| Co                             |       |       |       |       |       |       |       |       |       |       |       |       |       |       |       |       |
| Ni                             | 12.1  | 14.1  | 10.2  | 13.9  | 16.5  | 16.8  | 12.5  | 14.4  | 10.1  | 11.8  | 14.4  | 14.9  | 15.4  | 16.7  | 16.4  | 20.3  |
| Cu                             |       |       |       |       |       |       |       |       |       |       |       |       |       |       |       |       |
| Zn                             |       |       |       |       |       |       |       |       |       |       |       |       |       |       |       |       |

Table S3: Continued

| Location  |       |       |       |       |       |       |       |       |       |       |       |       |       |       |       |       |
|-----------|-------|-------|-------|-------|-------|-------|-------|-------|-------|-------|-------|-------|-------|-------|-------|-------|
| Sample    | DT-02 | DT-04 | DT-05 | DT-06 | DT-07 | DT-08 | DT-09 | DT-10 | DT-12 | DT-13 | DT-14 | DT-15 | DT-16 | DT-18 | DT-19 | DT-20 |
| Rock type |       |       |       |       |       |       |       |       |       |       |       |       |       |       |       |       |
| Reference |       |       |       |       |       |       |       |       |       |       |       |       |       |       |       |       |
| Age(Ma)   |       |       |       |       |       |       |       |       |       |       |       |       |       |       |       |       |
| Ga        |       |       |       |       |       |       |       |       |       |       |       |       |       |       |       |       |
| Ge        |       |       |       |       |       |       |       |       |       |       |       |       |       |       |       |       |
| Rb        | 85.1  | 72.8  | 74.1  | 78.8  | 73.8  | 79.0  | 71.8  | 74.1  | 74.4  | 91.8  | 72.0  | 75.9  | 66.9  | 80.2  | 73.8  | 74.9  |
| Sr        | 493   | 572   | 545   | 568   | 550   | 573   | 575   | 555   | 533   | 503   | 550   | 533   | 552   | 494   | 542   | 531   |
| Y         | 7.05  | 7.76  | 7.10  | 9.41  | 11.4  | 9.78  | 8.23  | 9.85  | 7.28  | 7.73  | 9.49  | 9.72  | 9.61  | 9.89  | 12.3  | 12.2  |
| Zr        | 159   | 139   | 124   | 147   | 130   | 148   | 139   | 164   | 135   | 160   | 159   | 144   | 129   | 124   | 128   | 136   |
| Nb        | 5.08  | 4.15  | 4.67  | 5.16  | 5.12  | 5.24  | 4.13  | 4.83  | 4.72  | 5.59  | 5.07  | 4.80  | 4.88  | 6.93  | 5.52  | 5.50  |
| Sn        |       |       |       |       |       |       |       |       |       |       |       |       |       |       |       |       |
| Cs        | 6.55  | 3.18  | 2.96  | 3.07  | 2.87  | 3.00  | 2.34  | 2.83  | 2.84  | 3.92  | 2.85  | 2.66  | 2.27  | 3.18  | 2.36  | 2.77  |
| Ba        | 654   | 893   | 620   | 543   | 328   | 408   | 773   | 582   | 677   | 386   | 341   | 795   | 592   | 397   | 614   | 686   |
| La        | 15.8  | 25.3  | 17.7  | 5.32  | 26.2  | 10.1  | 9.10  | 15.9  | 23.6  | 15.3  | 19.3  | 26.1  | 6.23  | 4.90  | 5.98  | 8.60  |
| Ce        | 31.2  | 48.9  | 33.0  | 9.19  | 50.9  | 20.8  | 18.0  | 31.7  | 45.1  | 29.1  | 38.8  | 48.5  | 13.9  | 11.0  | 13.9  | 20.1  |
| Pr        | 3.59  | 5.33  | 3.55  | 1.46  | 5.74  | 2.66  | 2.24  | 3.64  | 4.76  | 3.20  | 4.46  | 5.16  | 2.08  | 1.68  | 2.07  | 2.86  |
| Nd        | 13.4  | 19.2  | 12.7  | 7.19  | 20.6  | 11.2  | 9.46  | 14.7  | 16.7  | 12.3  | 17.2  | 18.6  | 9.80  | 8.40  | 10.1  | 13.3  |
| Sm        | 2.70  | 3.23  | 2.42  | 2.25  | 3.61  | 2.51  | 2.33  | 3.12  | 2.79  | 2.46  | 3.28  | 3.34  | 2.59  | 2.37  | 2.80  | 3.24  |
| Eu        | 0.72  | 0.78  | 0.78  | 0.75  | 0.85  | 0.75  | 0.79  | 0.86  | 0.81  | 0.70  | 0.81  | 0.79  | 0.76  | 0.68  | 0.77  | 0.82  |
| Gd        | 2.00  | 2.31  | 1.97  | 2.21  | 2.64  | 2.29  | 2.19  | 2.65  | 1.99  | 2.04  | 2.49  | 2.49  | 2.37  | 2.22  | 2.72  | 2.85  |
| Tb        | 0.29  | 0.33  | 0.27  | 0.32  | 0.43  | 0.33  | 0.31  | 0.38  | 0.30  | 0.31  | 0.38  | 0.38  | 0.34  | 0.33  | 0.40  | 0.44  |
| Dy        | 1.38  | 1.56  | 1.33  | 1.70  | 2.07  | 1.77  | 1.62  | 1.99  | 1.47  | 1.51  | 1.94  | 1.91  | 1.89  | 1.88  | 2.19  | 2.31  |
| Ho        | 0.26  | 0.28  | 0.24  | 0.32  | 0.40  | 0.34  | 0.30  | 0.38  | 0.27  | 0.28  | 0.35  | 0.36  | 0.35  | 0.36  | 0.44  | 0.43  |
| Er        | 0.75  | 0.82  | 0.71  | 0.93  | 1.20  | 0.98  | 0.85  | 1.04  | 0.79  | 0.85  | 1.04  | 1.04  | 1.06  | 1.05  | 1.27  | 1.29  |
| Tm        | 0.10  | 0.11  | 0.09  | 0.13  | 0.19  | 0.14  | 0.12  | 0.14  | 0.11  | 0.12  | 0.15  | 0.15  | 0.14  | 0.15  | 0.18  | 0.18  |
| Yb        | 0.74  | 0.71  | 0.67  | 0.91  | 1.01  | 0.94  | 0.76  | 0.95  | 0.77  | 0.77  | 0.94  | 0.98  | 0.96  | 1.08  | 1.21  | 1.15  |
| Lu        | 0.12  | 0.11  | 0.10  | 0.14  | 0.17  | 0.14  | 0.11  | 0.13  | 0.12  | 0.12  | 0.15  | 0.15  | 0.14  | 0.16  | 0.18  | 0.16  |
| Hf        | 4.61  | 3.72  | 3.48  | 3.95  | 3.40  | 3.87  | 3.76  | 4.49  | 4.01  | 4.46  | 4.41  | 4.11  | 3.79  | 3.63  | 3.68  | 3.85  |
| Ta        | 0.50  | 0.27  | 0.31  | 0.55  | 0.31  | 0.32  | 0.26  | 0.32  | 0.33  | 0.29  | 0.32  | 0.30  | 0.36  | 0.69  | 0.44  | 0.31  |

Table S3: Continued

| Location                            |       |       |       |       |       |       |       |          |       |       |       |          |       |       |       |       |
|-------------------------------------|-------|-------|-------|-------|-------|-------|-------|----------|-------|-------|-------|----------|-------|-------|-------|-------|
| Sample                              | DT-02 | DT-04 | DT-05 | DT-06 | DT-07 | DT-08 | DT-09 | DT-10    | DT-12 | DT-13 | DT-14 | DT-15    | DT-16 | DT-18 | DT-19 | DT-20 |
| Rock type                           |       |       |       |       |       |       |       |          |       |       |       |          |       |       |       |       |
| Reference                           |       |       |       |       |       |       |       |          |       |       |       |          |       |       |       |       |
| Age(Ma)                             |       |       |       |       |       |       |       |          |       |       |       |          |       |       |       |       |
| Pb                                  | 15.4  | 14.1  | 12.7  | 12.5  | 10.6  | 12.0  | 12.1  | 12.8     | 14.4  | 13.0  | 12.3  | 13.2     | 11.9  | 14.8  | 13.0  | 11.2  |
| Th                                  | 14.7  | 9.44  | 5.29  | 1.36  | 8.40  | 4.08  | 3.45  | 6.81     | 8.99  | 5.23  | 9.05  | 9.13     | 1.33  | 1.00  | 1.47  | 1.91  |
| U                                   | 2.38  | 3.24  | 2.33  | 1.61  | 1.28  | 2.22  | 1.23  | 1.77     | 1.52  | 1.17  | 1.78  | 1.67     | 1.03  | 1.73  | 0.96  | 1.08  |
| Isotopic date                       |       |       |       |       |       |       |       |          |       |       |       |          |       |       |       |       |
| $^{87}\text{Sr}/^{86}\text{Sr} (t)$ |       |       |       |       |       |       |       | 0.704308 |       |       |       | 0.705068 |       |       |       |       |
| $\epsilon_{\text{Nd}} (t)$          |       |       |       |       |       |       |       | -0.49    |       |       |       | -0.44    |       |       |       |       |
| Ratio                               |       |       |       |       |       |       |       |          |       |       |       |          |       |       |       |       |
| Mg#                                 | 52.6  | 51.2  | 52.0  | 52.5  | 53.8  | 54.4  | 52.4  | 52.2     | 51.6  | 52.6  | 53.6  | 54.4     | 54.9  | 54.9  | 54.9  | 55.8  |
| Sr/Y                                | 70.0  | 73.6  | 76.7  | 60.4  | 48.0  | 58.6  | 69.9  | 56.3     | 73.2  | 65.1  | 57.9  | 54.8     | 57.4  | 50.0  | 44.1  | 43.3  |
| Nb/La                               | 0.32  | 0.16  | 0.26  | 0.97  | 0.20  | 0.52  | 0.45  | 0.30     | 0.20  | 0.37  | 0.26  | 0.18     | 0.78  | 1.41  | 0.92  | 0.64  |
| Nb/U                                | 2.13  | 1.28  | 2.00  | 3.21  | 4.01  | 2.36  | 3.36  | 2.73     | 3.12  | 4.78  | 2.84  | 2.87     | 4.76  | 4.00  | 5.74  | 5.09  |



[illegible]

Table S3: Continued

| Location  |                     | Datian pluton |       |       |       |       |       |       |       |       |       |       |       |       |       |       |
|-----------|---------------------|---------------|-------|-------|-------|-------|-------|-------|-------|-------|-------|-------|-------|-------|-------|-------|
| Sample    | DT-21               | DT-22         | DT-23 | DT-24 | DT-25 | DT-27 | DT-28 | DT-29 | DT-30 | DT-31 | DT-32 | DT-33 | DT-34 | DT-35 | DT-36 | DT-37 |
| Rock type | Alkaine mafic rock  |               |       |       |       |       |       |       |       |       |       |       |       |       |       |       |
| Reference | Zhao and Zhou, 2007 |               |       |       |       |       |       |       |       |       |       |       |       |       |       |       |
| Age(Ma)   | 760                 |               |       |       |       |       |       |       |       |       |       |       |       |       |       |       |
| Ga        |                     |               |       |       |       |       |       |       |       |       |       |       |       |       |       |       |
| Ge        |                     |               |       |       |       |       |       |       |       |       |       |       |       |       |       |       |
| Rb        | 69.2                | 54.5          | 70.8  | 70.3  | 63.1  | 59.2  | 67.6  | 67.6  | 63.4  | 54.3  | 71.3  | 64.9  | 56.8  | 56.5  | 62.4  | 71.9  |
| Sr        | 497                 | 511           | 519   | 543   | 545   | 562   | 550   | 518   | 548   | 534   | 482   | 511   | 510   | 536   | 517   | 540   |
| Y         | 13.3                | 15.2          | 12.1  | 11.3  | 11.6  | 12.1  | 13.8  | 13.1  | 11.7  | 13.3  | 13.5  | 12.2  | 13.9  | 11.8  | 13.2  | 12.2  |
| Zr        | 127                 | 154           | 144   | 141   | 126   | 130   | 149   | 137   | 148   | 125   | 111   | 112   | 123   | 113   | 123   | 145   |
| Nb        | 5.00                | 4.54          | 5.56  | 5.18  | 5.17  | 4.48  | 4.93  | 5.14  | 5.07  | 5.06  | 5.84  | 5.47  | 4.82  | 5.07  | 5.26  | 5.12  |
| Sn        |                     |               |       |       |       |       |       |       |       |       |       |       |       |       |       |       |
| Cs        | 2.12                | 2.45          | 2.96  | 2.71  | 2.16  | 2.16  | 3.85  | 2.89  | 1.97  | 2.07  | 3.70  | 2.38  | 2.12  | 2.17  | 2.52  | 3.20  |
| Ba        | 707                 | 707           | 671   | 835   | 674   | 1290  | 840   | 667   | 542   | 593   | 412   | 633   | 506   | 469   | 557   | 873   |
| La        | 5.86                | 8.15          | 8.72  | 5.11  | 6.19  | 18.4  | 11.4  | 7.52  | 6.58  | 7.40  | 11.5  | 9.28  | 9.57  | 7.84  | 10.3  | 7.36  |
| Ce        | 14.9                | 20.6          | 20.3  | 13.2  | 15.8  | 39.0  | 25.3  | 18.7  | 16.8  | 19.4  | 27.3  | 22.4  | 24.1  | 19.4  | 23.8  | 18.6  |
| Pr        | 2.36                | 3.21          | 2.90  | 2.16  | 2.44  | 4.78  | 3.57  | 2.85  | 2.61  | 3.07  | 3.81  | 3.23  | 3.54  | 2.88  | 3.32  | 2.84  |
| Nd        | 11.7                | 15.2          | 13.3  | 10.7  | 11.8  | 18.7  | 15.8  | 13.8  | 12.6  | 14.7  | 16.9  | 14.5  | 15.7  | 13.6  | 15.0  | 13.4  |
| Sm        | 3.20                | 3.77          | 3.17  | 2.76  | 2.92  | 3.59  | 3.76  | 3.53  | 3.21  | 3.66  | 3.93  | 3.39  | 3.80  | 3.17  | 3.74  | 3.25  |
| Eu        | 0.79                | 0.84          | 0.77  | 0.78  | 0.78  | 0.92  | 0.87  | 0.84  | 0.87  | 0.88  | 0.88  | 0.83  | 0.83  | 0.85  | 0.88  | 0.86  |
| Gd        | 3.15                | 3.43          | 2.71  | 2.62  | 2.72  | 2.93  | 3.26  | 3.08  | 2.84  | 3.20  | 3.35  | 2.91  | 3.22  | 2.85  | 3.47  | 2.89  |
| Tb        | 0.46                | 0.50          | 0.40  | 0.38  | 0.38  | 0.43  | 0.47  | 0.48  | 0.41  | 0.47  | 0.49  | 0.42  | 0.48  | 0.41  | 0.48  | 0.42  |
| Dy        | 2.50                | 2.76          | 2.25  | 2.04  | 2.09  | 2.22  | 2.64  | 2.54  | 2.23  | 2.58  | 2.69  | 2.33  | 2.69  | 2.32  | 2.55  | 2.37  |
| Ho        | 0.46                | 0.53          | 0.43  | 0.37  | 0.39  | 0.44  | 0.50  | 0.48  | 0.44  | 0.49  | 0.49  | 0.45  | 0.50  | 0.43  | 0.50  | 0.44  |
| Er        | 1.37                | 1.53          | 1.25  | 1.12  | 1.17  | 1.29  | 1.49  | 1.41  | 1.28  | 1.46  | 1.47  | 1.32  | 1.51  | 1.27  | 1.37  | 1.33  |
| Tm        | 0.18                | 0.22          | 0.17  | 0.15  | 0.16  | 0.19  | 0.21  | 0.20  | 0.17  | 0.20  | 0.20  | 0.18  | 0.21  | 0.17  | 0.18  | 0.18  |
| Yb        | 1.22                | 1.45          | 1.07  | 0.99  | 1.02  | 1.21  | 1.37  | 1.29  | 1.18  | 1.30  | 1.35  | 1.21  | 1.38  | 1.14  | 1.19  | 1.20  |
| Lu        | 0.16                | 0.20          | 0.15  | 0.15  | 0.15  | 0.18  | 0.21  | 0.19  | 0.17  | 0.19  | 0.19  | 0.18  | 0.20  | 0.17  | 0.17  | 0.18  |
| Hf        | 3.61                | 4.27          | 3.85  | 3.66  | 3.23  | 3.71  | 4.17  | 3.88  | 4.10  | 3.67  | 3.22  | 3.33  | 3.65  | 3.23  | 3.42  | 3.92  |
| Ta        | 0.33                | 0.32          | 0.33  | 0.23  | 0.29  | 0.30  | 0.44  | 0.36  | 0.29  | 0.28  | 0.42  | 0.47  | 0.42  | 0.29  | 0.37  | 0.41  |

Table S3: Continued

| Location                               |                     | Datian pluton |       |       |          |       |       |       |          |       |       |       |          |       |       |       |
|----------------------------------------|---------------------|---------------|-------|-------|----------|-------|-------|-------|----------|-------|-------|-------|----------|-------|-------|-------|
| Sample                                 | DT-21               | DT-22         | DT-23 | DT-24 | DT-25    | DT-27 | DT-28 | DT-29 | DT-30    | DT-31 | DT-32 | DT-33 | DT-34    | DT-35 | DT-36 | DT-37 |
| Rock type                              | Alkaine mafic rock  |               |       |       |          |       |       |       |          |       |       |       |          |       |       |       |
| Reference                              | Zhao and Zhou, 2007 |               |       |       |          |       |       |       |          |       |       |       |          |       |       |       |
| Age(Ma)                                | 760                 |               |       |       |          |       |       |       |          |       |       |       |          |       |       |       |
| Pb                                     | 13.0                | 12.4          | 10.4  | 10.7  | 10.2     | 13.9  | 14.0  | 14.2  | 10.5     | 11.4  | 11.2  | 12.7  | 13.8     | 11.1  | 12.0  | 14.0  |
| Th                                     | 1.61                | 2.02          | 2.08  | 0.55  | 1.00     | 7.79  | 3.67  | 2.12  | 0.84     | 1.24  | 3.37  | 2.84  | 2.63     | 1.24  | 2.39  | 1.30  |
| U                                      | 1.67                | 3.85          | 1.29  | 1.20  | 1.35     | 1.13  | 1.35  | 1.82  | 0.83     | 1.24  | 1.06  | 3.34  | 1.69     | 1.10  | 1.20  | 1.25  |
| Isotopic date                          |                     |               |       |       |          |       |       |       |          |       |       |       |          |       |       |       |
| <sup>87</sup> Sr/ <sup>86</sup> Sr (t) |                     |               |       |       | 0.705010 |       |       |       | 0.704865 |       |       |       | 0.705018 |       |       |       |
| εNd (t)                                |                     |               |       |       | -0.92    |       |       |       | -0.55    |       |       |       | -0.45    |       |       |       |
| Ratio                                  |                     |               |       |       |          |       |       |       |          |       |       |       |          |       |       |       |
| Mg#                                    | 57.6                | 57.7          | 56.2  | 56.5  | 57.0     | 57.1  | 57.0  | 57.0  | 58.3     | 57.0  | 57.3  | 56.8  | 57.4     | 57.0  | 57.0  | 57.0  |
| Sr/Y                                   | 37.4                | 33.5          | 42.8  | 48.1  | 46.9     | 46.3  | 39.8  | 39.6  | 46.9     | 40.2  | 35.8  | 41.9  | 36.8     | 45.3  | 39.2  | 44.3  |
| Nb/La                                  | 0.85                | 0.56          | 0.64  | 1.01  | 0.83     | 0.24  | 0.43  | 0.68  | 0.77     | 0.68  | 0.51  | 0.59  | 0.50     | 0.65  | 0.51  | 0.70  |
| Nb/U                                   | 3.00                | 1.18          | 4.31  | 4.32  | 3.83     | 3.96  | 3.65  | 2.82  | 6.13     | 4.09  | 5.53  | 1.64  | 2.85     | 4.61  | 4.39  | 4.08  |

| Location                        |       |       |       |       |       |       |       |        |       |       |       |       |       |       |       |       |
|---------------------------------|-------|-------|-------|-------|-------|-------|-------|--------|-------|-------|-------|-------|-------|-------|-------|-------|
| Sample                          | DT-38 | DT-39 | DT-40 | DT-41 | DT-42 | DT-43 | DT-45 | DT-46  | HL-15 | HL-16 | HL-17 | HL-18 | HL-19 | HL-20 | HL-21 | HL-22 |
| Rock type                       |       |       |       |       |       |       |       |        |       |       |       |       |       |       |       |       |
| Reference                       |       |       |       |       |       |       |       |        |       |       |       |       |       |       |       |       |
| Age(Ma)                         |       |       |       |       |       |       |       |        |       |       |       |       |       |       |       |       |
| Major(wt.%)                     |       |       |       |       |       |       |       |        |       |       |       |       |       |       |       |       |
| SiO <sub>2</sub>                | 63.51 | 64.54 | 61.90 | 61.82 | 61.79 | 61.45 | 64.76 | 63.10  | 62.91 | 51.23 | 60.47 | 51.58 | 60.64 | 60.70 | 59.78 | 59.90 |
| TiO <sub>2</sub>                | 0.41  | 0.35  | 0.40  | 0.48  | 0.54  | 0.52  | 0.51  | 0.53   | 0.53  | 0.74  | 0.65  | 0.74  | 0.59  | 0.61  | 0.64  | 0.68  |
| Al <sub>2</sub> O <sub>3</sub>  | 17.11 | 16.74 | 17.54 | 17.07 | 16.44 | 16.94 | 16.27 | 17.29  | 16.83 | 18.93 | 17.79 | 20.96 | 17.63 | 17.16 | 17.21 | 17.22 |
| Fe <sub>2</sub> O <sub>3T</sub> | 3.95  | 3.53  | 3.58  | 4.50  | 4.79  | 4.59  | 4.27  | 4.71   | 4.62  | 8.11  | 5.21  | 6.73  | 4.97  | 5.32  | 5.85  | 5.72  |
| Fe <sub>2</sub> O <sub>3</sub>  |       |       |       |       |       |       |       |        |       |       |       |       |       |       |       |       |
| FeO                             |       |       |       |       |       |       |       |        |       |       |       |       |       |       |       |       |
| MnO                             | 0.07  | 0.06  | 0.06  | 0.07  | 0.08  | 0.07  | 0.07  | 0.07   | 0.07  | 0.14  | 0.07  | 0.11  | 0.08  | 0.09  | 0.09  | 0.09  |
| MgO                             | 2.16  | 1.94  | 2.16  | 2.54  | 2.72  | 2.64  | 2.40  | 2.87   | 2.65  | 4.73  | 2.80  | 3.85  | 2.87  | 3.11  | 3.27  | 3.34  |
| CaO                             | 5.14  | 3.77  | 2.85  | 5.20  | 5.28  | 5.23  | 4.70  | 5.26   | 4.97  | 8.58  | 4.94  | 8.90  | 5.62  | 6.09  | 5.98  | 5.84  |
| Na <sub>2</sub> O               | 4.06  | 4.27  | 5.26  | 3.93  | 3.62  | 3.81  | 3.87  | 3.46   | 3.23  | 3.45  | 3.83  | 3.86  | 3.37  | 3.44  | 3.36  | 3.37  |
| K <sub>2</sub> O                | 2.00  | 2.44  | 2.06  | 2.29  | 2.10  | 2.22  | 1.95  | 1.94   | 2.41  | 0.59  | 1.67  | 0.96  | 1.91  | 1.85  | 1.97  | 2.01  |
| P <sub>2</sub> O <sub>5</sub>   | 0.12  | 0.12  | 0.21  | 0.13  | 0.14  | 0.13  | 0.13  | 0.12   | 0.15  | 0.20  | 0.19  | 0.20  | 0.17  | 0.18  | 0.18  | 0.19  |
| LOI                             | 0.99  | 2.06  | 2.82  | 1.08  | 1.15  | 1.21  | 0.90  | 0.88   | 0.96  | 1.83  | 1.98  | 1.70  | 1.24  | 0.93  | 0.90  | 0.93  |
| TOL                             | 99.51 | 99.82 | 98.84 | 99.13 | 98.64 | 98.82 | 99.81 | 100.23 | 99.32 | 98.52 | 99.61 | 99.59 | 99.10 | 99.48 | 99.23 | 99.31 |
| Trace(ppm)                      |       |       |       |       |       |       |       |        |       |       |       |       |       |       |       |       |
| Li                              |       |       |       |       |       |       |       |        |       |       |       |       |       |       |       |       |
| Be                              |       |       |       |       |       |       |       |        |       |       |       |       |       |       |       |       |
| Sc                              | 16.0  | 13.1  | 10.5  | 12.9  | 14.9  | 12.5  | 9.81  | 12.1   | 9.67  | 14.8  | 9.72  | 13.0  | 10.2  | 11.0  | 9.78  | 11.3  |
| V                               | 63.0  | 61.4  | 53.5  | 81.1  | 86.7  | 83.3  | 73.6  | 87.4   | 78.6  | 173   | 86.8  | 120   | 81.2  | 91.7  | 95.2  | 100   |
| Cr                              | 30.1  | 28.5  | 23.8  | 37.1  | 40.6  | 44.1  | 36.4  | 37.6   | 58.5  | 62.3  | 65.6  | 69.3  | 57.2  | 64.1  | 69.6  | 69.2  |
| Co                              |       |       |       |       |       |       |       |        |       |       |       |       |       |       |       |       |
| Ni                              | 17.5  | 13.6  | 14.5  | 21.9  | 22.9  | 27.0  | 21.3  | 36.9   | 24.9  | 34.8  | 28.0  | 32.7  | 25.4  | 29.1  | 29.2  | 31.4  |
| Cu                              |       |       |       |       |       |       |       |        |       |       |       |       |       |       |       |       |
| Zn                              |       |       |       |       |       |       |       |        |       |       |       |       |       |       |       |       |

**Table S3: Continued**

| Location  |       |       |       |       |       |       |       |       |       |       |       |       |       |       |       |       |
|-----------|-------|-------|-------|-------|-------|-------|-------|-------|-------|-------|-------|-------|-------|-------|-------|-------|
| Sample    | DT-38 | DT-39 | DT-40 | DT-41 | DT-42 | DT-43 | DT-45 | DT-46 | HL-15 | HL-16 | HL-17 | HL-18 | HL-19 | HL-20 | HL-21 | HL-22 |
| Rock type |       |       |       |       |       |       |       |       |       |       |       |       |       |       |       |       |
| Reference |       |       |       |       |       |       |       |       |       |       |       |       |       |       |       |       |
| Age(Ma)   |       |       |       |       |       |       |       |       |       |       |       |       |       |       |       |       |
| Ga        |       |       |       |       |       |       |       |       |       |       |       |       |       |       |       |       |
| Ge        |       |       |       |       |       |       |       |       |       |       |       |       |       |       |       |       |
| Rb        | 62.3  | 79.8  | 72.9  | 70.6  | 69.1  | 77.6  | 85.2  | 80.3  | 64.1  | 5.51  | 38.3  | 16.6  | 47.4  | 48.0  | 49.3  | 54.2  |
| Sr        | 518   | 555   | 595   | 538   | 507   | 524   | 467   | 471   | 399   | 497   | 409   | 779   | 424   | 433   | 410   | 416   |
| Y         | 12.6  | 12.7  | 7.42  | 10.6  | 13.5  | 11.8  | 9.84  | 11.9  | 10.5  | 10.9  | 8.40  | 15.4  | 10.1  | 12.8  | 11.4  | 12.8  |
| Zr        | 121   | 151   | 62.0  | 145   | 113   | 172   | 101   | 182   | 114   | 71.5  | 113   | 152   | 100   | 92.9  | 58.1  | 111   |
| Nb        | 4.97  | 4.05  | 5.17  | 5.07  | 5.41  | 5.56  | 5.75  | 5.52  | 4.32  | 3.10  | 3.69  | 2.89  | 3.96  | 4.64  | 4.40  | 4.92  |
| Sn        |       |       |       |       |       |       |       |       |       |       |       |       |       |       |       |       |
| Cs        | 2.18  | 2.63  | 3.54  | 3.10  | 2.19  | 2.43  | 3.50  | 2.94  | 2.27  | 0.42  | 0.61  | 0.54  | 2.51  | 2.62  | 2.82  | 3.11  |
| Ba        | 655   | 840   | 689   | 1070  | 675   | 620   | 329   | 490   | 752   | 392   | 633   | 406   | 514   | 482   | 575   | 457   |
| La        | 12.0  | 13.8  | 76.0  | 11.4  | 17.1  | 10.3  | 3.56  | 6.00  | 13.2  | 17.5  | 17.0  | 13.4  | 10.7  | 11.1  | 33.0  | 13.3  |
| Ce        | 24.6  | 29.3  | 154   | 24.3  | 35.6  | 23.1  | 8.25  | 15.1  | 27.1  | 29.7  | 33.6  | 28.7  | 24.9  | 26.6  | 65.4  | 29.3  |
| Pr        | 3.22  | 3.82  | 14.7  | 3.17  | 4.38  | 3.12  | 1.29  | 2.34  | 3.86  | 3.70  | 4.28  | 4.13  | 3.47  | 3.82  | 7.51  | 4.21  |
| Nd        | 13.9  | 16.0  | 48.1  | 13.0  | 17.6  | 13.6  | 6.74  | 10.9  | 16.6  | 15.0  | 17.1  | 19.2  | 15.6  | 17.9  | 27.1  | 18.4  |
| Sm        | 3.43  | 3.51  | 6.39  | 3.01  | 3.71  | 3.06  | 2.04  | 2.83  | 3.42  | 2.89  | 2.93  | 4.29  | 3.39  | 3.97  | 4.67  | 3.91  |
| Eu        | 0.89  | 0.79  | 1.06  | 0.85  | 0.82  | 0.81  | 0.60  | 0.70  | 0.88  | 0.86  | 0.87  | 0.95  | 0.80  | 0.85  | 0.93  | 0.80  |
| Gd        | 3.20  | 3.10  | 3.43  | 2.48  | 3.31  | 2.64  | 2.11  | 2.57  | 2.21  | 2.07  | 2.41  | 2.50  | 2.07  | 2.26  | 4.17  | 2.36  |
| Tb        | 0.47  | 0.45  | 0.47  | 0.38  | 0.47  | 0.40  | 0.31  | 0.38  | 0.37  | 0.35  | 0.35  | 0.47  | 0.36  | 0.41  | 0.57  | 0.42  |
| Dy        | 2.52  | 2.34  | 1.68  | 1.97  | 2.55  | 2.16  | 1.80  | 2.13  | 2.13  | 2.04  | 1.89  | 2.70  | 2.06  | 2.38  | 3.06  | 2.38  |
| Ho        | 0.47  | 0.44  | 0.28  | 0.38  | 0.45  | 0.41  | 0.35  | 0.42  | 0.44  | 0.47  | 0.36  | 0.63  | 0.44  | 0.53  | 0.51  | 0.52  |
| Er        | 1.32  | 1.33  | 0.76  | 1.09  | 1.35  | 1.22  | 1.01  | 1.28  | 1.30  | 1.33  | 0.95  | 1.70  | 1.27  | 1.47  | 1.50  | 1.47  |
| Tm        | 0.17  | 0.17  | 0.088 | 0.15  | 0.18  | 0.16  | 0.14  | 0.18  | 0.19  | 0.21  | 0.15  | 0.27  | 0.19  | 0.22  | 0.21  | 0.22  |
| Yb        | 1.02  | 1.18  | 0.54  | 1.00  | 1.19  | 1.09  | 0.96  | 1.26  | 1.35  | 1.38  | 1.01  | 1.82  | 1.28  | 1.52  | 1.54  | 1.48  |
| Lu        | 0.15  | 0.16  | 0.079 | 0.15  | 0.17  | 0.16  | 0.13  | 0.19  | 0.21  | 0.22  | 0.16  | 0.29  | 0.20  | 0.24  | 0.24  | 0.23  |
| Hf        | 3.22  | 4.01  | 1.64  | 3.73  | 3.20  | 4.29  | 2.84  | 4.92  | 4.04  | 2.31  | 3.81  | 5.13  | 3.55  | 3.31  | 2.51  | 3.93  |
| Ta        | 0.31  | 0.29  | 0.26  | 0.34  | 0.38  | 0.39  | 0.42  | 0.39  | 0.27  | 0.15  | 0.25  | 0.32  | 0.23  | 0.22  | 0.16  | 0.26  |

Table S3: Continued

| Location                               |          |       |       |       |       |       |       |       |       |       |       |       |       |       |       |       |
|----------------------------------------|----------|-------|-------|-------|-------|-------|-------|-------|-------|-------|-------|-------|-------|-------|-------|-------|
| Sample                                 | DT-38    | DT-39 | DT-40 | DT-41 | DT-42 | DT-43 | DT-45 | DT-46 | HL-15 | HL-16 | HL-17 | HL-18 | HL-19 | HL-20 | HL-21 | HL-22 |
| Rock type                              |          |       |       |       |       |       |       |       |       |       |       |       |       |       |       |       |
| Reference                              |          |       |       |       |       |       |       |       |       |       |       |       |       |       |       |       |
| Age(Ma)                                |          |       |       |       |       |       |       |       |       |       |       |       |       |       |       |       |
| Pb                                     | 14.4     | 12.4  | 8.85  | 13.2  | 12.0  | 13.7  | 11.1  | 12.3  | 13.3  | 6.47  | 8.17  | 8.67  | 11.5  | 12.4  | 12.4  | 11.6  |
| Th                                     | 2.47     | 5.34  | 18.7  | 3.41  | 4.61  | 2.72  | 1.70  | 1.94  | 2.66  | 0.87  | 0.34  | 0.96  | 1.47  | 0.88  | 9.88  | 1.89  |
| U                                      | 0.78     | 2.08  | 1.02  | 1.79  | 1.45  | 0.97  | 2.63  | 1.39  | 0.96  | 0.30  | 0.17  | 0.67  | 0.69  | 1.05  | 0.85  | 0.77  |
| Isotopic date                          |          |       |       |       |       |       |       |       |       |       |       |       |       |       |       |       |
| <sup>87</sup> Sr/ <sup>86</sup> Sr (t) | 0.704546 |       |       |       |       |       |       |       |       |       |       |       |       |       |       |       |
| εNd (t)                                | 0.62     |       |       |       |       |       |       |       |       |       |       |       |       |       |       |       |
| Ratio                                  |          |       |       |       |       |       |       |       |       |       |       |       |       |       |       |       |
| Mg#                                    | 56.1     | 56.1  | 58.5  | 56.8  | 57.0  | 57.2  | 56.7  | 58.7  | 57.1  | 57.6  | 55.6  | 57.1  | 57.4  | 57.6  | 56.5  | 57.7  |
| Sr/Y                                   | 41.0     | 43.8  | 80.2  | 50.9  | 37.7  | 44.4  | 47.5  | 39.5  | 37.9  | 45.5  | 48.7  | 50.5  | 42.0  | 33.9  | 35.9  | 32.4  |
| Nb/La                                  | 0.41     | 0.29  | 0.068 | 0.44  | 0.32  | 0.54  | 1.61  | 0.92  | 0.33  | 0.18  | 0.22  | 0.22  | 0.37  | 0.42  | 0.13  | 0.37  |
| Nb/U                                   | 6.39     | 1.94  | 5.07  | 2.83  | 3.73  | 5.73  | 2.18  | 3.98  | 4.52  | 10.4  | 22.0  | 4.33  | 5.79  | 4.41  | 5.16  | 6.40  |

[illegible]

Table S3: Continued

| Location  |                     |       |       | Dajianshan pluton |       |       |       |       |       |       |       |       |       |       |       |       |
|-----------|---------------------|-------|-------|-------------------|-------|-------|-------|-------|-------|-------|-------|-------|-------|-------|-------|-------|
| Sample    | HL-23               | HL-24 | HL-26 | HL-01             | HL-02 | HL-03 | HL-04 | HL-05 | HL-06 | HL-07 | HL-08 | HL-09 | HL-10 | HL-11 | HL-12 | HL-13 |
| Rock type | Alkaine mafic rock  |       |       |                   |       |       |       |       |       |       |       |       |       |       |       |       |
| Reference | Zhao and Zhou, 2007 |       |       |                   |       |       |       |       |       |       |       |       |       |       |       |       |
| Age(Ma)   | 760                 |       |       |                   |       |       |       |       |       |       |       |       |       |       |       |       |
| Ga        |                     |       |       |                   |       |       |       |       |       |       |       |       |       |       |       |       |
| Ge        |                     |       |       |                   |       |       |       |       |       |       |       |       |       |       |       |       |
| Rb        | 25.6                | 0.27  | 25.4  | 11.5              | 4.10  | 8.02  | 3.39  | 12.0  | 10.0  | 4.82  | 23.3  | 9.64  | 9.36  | 9.85  | 8.28  | 10.9  |
| Sr        | 630                 | 1020  | 524   | 496               | 654   | 510   | 614   | 414   | 508   | 473   | 412   | 475   | 489   | 522   | 522   | 530   |
| Y         | 8.15                | 9.14  | 12.1  | 11.2              | 17.9  | 11.8  | 12.5  | 15.3  | 16.2  | 10.6  | 13.1  | 11.1  | 10.2  | 10.9  | 10.2  | 15.7  |
| Zr        | 65.7                | 45.7  | 73.1  | 24.1              | 250   | 88.7  | 114   | 88.0  | 88.9  | 65.3  | 45.3  | 56.1  | 90.9  | 78.4  | 76.9  | 113   |
| Nb        | 3.35                | 2.46  | 3.60  | 3.36              | 3.16  | 3.44  | 2.99  | 4.34  | 3.87  | 3.36  | 3.04  | 3.46  | 3.13  | 3.36  | 3.24  | 3.30  |
| Sn        |                     |       |       |                   |       |       |       |       |       |       |       |       |       |       |       |       |
| Cs        | 1.05                | 0.09  | 1.40  | 0.33              | 0.13  | 0.24  | 0.14  | 0.25  | 0.23  | 0.19  | 0.37  | 0.23  | 0.13  | 0.13  | 0.18  | 0.27  |
| Ba        | 242                 | 11.6  | 327   | 556               | 304   | 498   | 301   | 505   | 570   | 378   | 702   | 429   | 450   | 467   | 454   | 522   |
| La        | 21.4                | 18.5  | 21.5  | 18.1              | 18.1  | 17.4  | 17.7  | 22.3  | 19.9  | 16.9  | 16.9  | 18.6  | 18.9  | 19.5  | 19.4  | 19.2  |
| Ce        | 35.6                | 33.2  | 41.4  | 32.3              | 34.9  | 32.0  | 33.2  | 40.8  | 37.1  | 31.4  | 34.0  | 32.9  | 32.6  | 33.8  | 32.9  | 38.0  |
| Pr        | 4.41                | 4.04  | 5.31  | 3.98              | 4.98  | 4.04  | 4.34  | 5.34  | 4.99  | 3.69  | 4.25  | 3.96  | 3.97  | 4.01  | 4.01  | 5.18  |
| Nd        | 17.2                | 17.0  | 22.8  | 15.9              | 22.3  | 16.9  | 18.4  | 21.2  | 21.0  | 14.8  | 17.7  | 16.2  | 15.9  | 16.2  | 15.9  | 22.1  |
| Sm        | 2.91                | 3.10  | 4.09  | 3.00              | 4.57  | 3.26  | 3.47  | 4.01  | 4.07  | 2.60  | 3.44  | 3.01  | 2.91  | 3.01  | 2.94  | 4.21  |
| Eu        | 0.68                | 0.62  | 0.86  | 0.92              | 1.10  | 0.87  | 0.91  | 0.92  | 0.99  | 0.79  | 1.00  | 0.82  | 0.82  | 0.84  | 0.81  | 0.99  |
| Gd        | 2.30                | 2.25  | 2.98  | 2.31              | 2.83  | 2.41  | 2.46  | 3.03  | 2.82  | 2.17  | 2.45  | 2.30  | 2.34  | 2.34  | 2.32  | 2.96  |
| Tb        | 0.34                | 0.36  | 0.48  | 0.36              | 0.50  | 0.39  | 0.42  | 0.49  | 0.47  | 0.33  | 0.40  | 0.36  | 0.36  | 0.36  | 0.36  | 0.49  |
| Dy        | 1.84                | 1.96  | 2.64  | 2.06              | 3.16  | 2.24  | 2.38  | 2.79  | 2.79  | 1.90  | 2.35  | 2.07  | 2.06  | 2.07  | 2.03  | 2.87  |
| Ho        | 0.33                | 0.38  | 0.52  | 0.46              | 0.73  | 0.51  | 0.53  | 0.63  | 0.62  | 0.41  | 0.53  | 0.46  | 0.45  | 0.46  | 0.44  | 0.66  |
| Er        | 0.91                | 1.01  | 1.47  | 1.32              | 2.08  | 1.44  | 1.53  | 1.77  | 1.80  | 1.21  | 1.48  | 1.30  | 1.31  | 1.31  | 1.26  | 1.87  |
| Tm        | 0.14                | 0.15  | 0.23  | 0.20              | 0.34  | 0.22  | 0.23  | 0.28  | 0.29  | 0.19  | 0.23  | 0.20  | 0.20  | 0.20  | 0.19  | 0.30  |
| Yb        | 0.97                | 0.98  | 1.57  | 1.30              | 2.25  | 1.45  | 1.56  | 1.84  | 1.82  | 1.24  | 1.51  | 1.35  | 1.32  | 1.34  | 1.27  | 1.96  |
| Lu        | 0.15                | 0.15  | 0.24  | 0.21              | 0.36  | 0.23  | 0.25  | 0.30  | 0.30  | 0.20  | 0.25  | 0.22  | 0.21  | 0.21  | 0.21  | 0.31  |
| Hf        | 2.33                | 1.86  | 2.67  | 1.09              | 7.10  | 2.81  | 3.73  | 2.98  | 2.98  | 2.29  | 1.82  | 2.14  | 2.94  | 2.66  | 2.66  | 3.62  |
| Ta        | 0.15                | 0.11  | 0.17  | 0.17              | 0.47  | 0.18  | 0.24  | 0.19  | 0.19  | 0.14  | 0.12  | 0.14  | 0.19  | 0.17  | 0.18  | 0.24  |



Table S3: Continued

| Location                            |                     |       |       | Dajianshan pluton |       |       |       |          |       |       |       |       |       |          |       |       |
|-------------------------------------|---------------------|-------|-------|-------------------|-------|-------|-------|----------|-------|-------|-------|-------|-------|----------|-------|-------|
| Sample                              | HL-23               | HL-24 | HL-26 | HL-01             | HL-02 | HL-03 | HL-04 | HL-05    | HL-06 | HL-07 | HL-08 | HL-09 | HL-10 | HL-11    | HL-12 | HL-13 |
| Rock type                           | Alkaine mafic rock  |       |       |                   |       |       |       |          |       |       |       |       |       |          |       |       |
| Reference                           | Zhao and Zhou, 2007 |       |       |                   |       |       |       |          |       |       |       |       |       |          |       |       |
| Age(Ma)                             | 760                 |       |       |                   |       |       |       |          |       |       |       |       |       |          |       |       |
| Pb                                  | 9.41                | 11.6  | 9.12  | 5.93              | 5.08  | 6.51  | 4.71  | 5.97     | 6.68  | 6.15  | 5.37  | 6.80  | 5.88  | 5.99     | 6.31  | 5.39  |
| Th                                  | 4.25                | 2.25  | 1.63  | 0.79              | 0.28  | 0.74  | 0.24  | 1.84     | 0.94  | 0.77  | 0.29  | 0.53  | 0.48  | 0.47     | 1.52  | 0.25  |
| U                                   | 0.97                | 0.63  | 0.47  | 0.11              | 0.17  | 0.09  | 0.40  | 0.20     | 0.16  | 0.06  | 0.26  | 0.12  | 0.11  | 0.34     | 0.09  | 0.11  |
| Isotopic date                       |                     |       |       |                   |       |       |       |          |       |       |       |       |       |          |       |       |
| $^{87}\text{Sr}/^{86}\text{Sr} (t)$ | 0.704803            |       |       |                   |       |       |       | 0.704688 |       |       |       |       |       | 0.704613 |       |       |
| $\epsilon_{\text{Nd}} (t)$          | -0.01               |       |       |                   |       |       |       | 0.66     |       |       |       |       |       | 0.45     |       |       |
| Ratio                               |                     |       |       |                   |       |       |       |          |       |       |       |       |       |          |       |       |
| Mg#                                 | 54.4                | 41.8  | 56.3  | 57.7              | 53.5  | 56.4  | 56.1  | 58.3     | 56.4  | 57.0  | 57.1  | 57.1  | 56.5  | 57.5     | 56.8  | 57.0  |
| Sr/Y                                | 77.3                | 111   | 43.2  | 44.4              | 36.5  | 43.2  | 48.9  | 27.0     | 31.3  | 44.6  | 31.5  | 42.9  | 48.0  | 48.1     | 51.0  | 33.7  |
| Nb/La                               | 0.16                | 0.13  | 0.17  | 0.19              | 0.17  | 0.20  | 0.17  | 0.20     | 0.19  | 0.20  | 0.18  | 0.19  | 0.17  | 0.17     | 0.17  | 0.17  |
| Nb/U                                | 3.45                | 3.90  | 7.63  | 31.7              | 18.7  | 40.5  | 7.52  | 21.7     | 23.9  | 53.3  | 11.7  | 29.3  | 27.7  | 9.79     | 38.2  | 29.2  |

[illegible]

Table S3: Continued

| Location  |       | Xuelongbao         |      |      |       |       |       |       |       |       |       |       |       |       |       |
|-----------|-------|--------------------|------|------|-------|-------|-------|-------|-------|-------|-------|-------|-------|-------|-------|
| Sample    | HL-14 | XL-4               | XL-6 | XL-7 | XL-19 | XL-20 | XL-21 | XL-25 | XL-26 | XL-28 | XL-29 | XL-34 | XL-35 | XL-36 | XL-38 |
| Rock type |       | Alkaine mafic rock |      |      |       |       |       |       |       |       |       |       |       |       |       |
| Reference |       | Zhou et al., 2006  |      |      |       |       |       |       |       |       |       |       |       |       |       |
| Age(Ma)   |       | 748                |      |      |       |       |       |       |       |       |       |       |       |       |       |
| Ga        |       | 2.00               | 2.48 | 2.57 | 1.83  | 1.31  | 2.02  | 0.86  | 0.60  | 1.26  | 0.60  | 1.32  | 1.37  | 1.80  | 1.79  |
| Ge        |       |                    |      |      |       |       |       |       |       |       |       |       |       |       |       |
| Rb        | 10.5  | 38.0               | 36.0 | 34.0 | 29.0  | 19.0  | 33.0  | 7.00  | 18.0  | 36.0  | 23.0  | 28.0  | 20.0  | 33.0  | 31.0  |
| Sr        | 522   | 610                | 576  | 481  | 725   | 548   | 671   | 403   | 371   | 320   | 388   | 710   | 737   | 431   | 702   |
| Y         | 12.8  | 5.93               | 7.45 | 3.74 | 5.81  | 3.57  | 11.2  | 3.61  | 1.87  | 3.53  | 1.78  | 5.55  | 3.77  | 4.80  | 5.89  |
| Zr        | 93.0  | 64.0               | 72.0 | 78.0 | 67.0  | 57.0  | 83.0  | 112   | 82.0  | 83.0  | 54.0  | 82.0  | 73.0  | 92.0  | 91.0  |
| Nb        | 3.12  | 2.00               | 2.48 | 2.57 | 1.83  | 1.31  | 2.02  | 0.86  | 0.60  | 1.26  | 0.60  | 1.32  | 1.37  | 1.80  | 1.79  |
| Sn        |       |                    |      |      |       |       |       |       |       |       |       |       |       |       |       |
| Cs        | 0.38  |                    |      |      |       |       |       |       |       |       |       |       |       |       |       |
| Ba        | 543   | 690                | 583  | 603  | 367   | 423   | 577   | 304   | 622   | 858   | 594   | 574   | 444   | 419   | 411   |
| La        | 19.4  | 25.0               | 18.0 | 7.00 | 3.00  | 19.0  | 8.00  | 23.0  | 7.00  | 10.0  | 5.00  | 3.00  | 2.00  | 2.00  | 2.00  |
| Ce        | 34.8  | 51.0               | 36.0 | 13.0 | 6.00  | 37.0  | 19.0  | 44.0  | 13.0  | 21.0  | 8.00  | 6.00  | 4.00  | 5.00  | 6.00  |
| Pr        | 4.39  |                    |      |      |       |       |       |       |       |       |       |       |       |       |       |
| Nd        | 18.3  | 18.0               | 14.0 | 6.00 | 4.00  | 13.0  | 12.0  | 19.0  | 5.00  | 9.00  | 4.00  | 4.00  | 3.00  | 3.00  | 4.00  |
| Sm        | 3.52  | 2.59               | 2.42 | 1.02 | 1.28  | 1.93  | 2.77  | 2.86  | 0.73  | 1.61  | 0.67  | 1.29  | 0.80  | 0.96  | 1.40  |
| Eu        | 0.93  | 0.67               | 0.65 | 0.39 | 0.60  | 0.69  | 0.82  | 0.68  | 0.41  | 0.52  | 0.46  | 0.60  | 0.45  | 0.54  | 0.56  |
| Gd        | 2.54  | 2.65               | 2.34 | 1.01 | 1.23  | 1.92  | 2.56  | 2.55  | 0.74  | 1.60  | 0.64  | 1.16  | 0.79  | 0.98  | 1.23  |
| Tb        | 0.41  | 0.26               | 0.27 | 0.11 | 0.19  | 0.18  | 0.34  | 0.21  | 0.07  | 0.16  | 0.07  | 0.18  | 0.12  | 0.15  | 0.18  |
| Dy        | 2.42  | 1.13               | 1.42 | 0.62 | 1.06  | 0.73  | 2.02  | 0.78  | 0.34  | 0.81  | 0.31  | 0.97  | 0.64  | 0.82  | 1.03  |
| Ho        | 0.55  | 0.21               | 0.25 | 0.12 | 0.20  | 0.12  | 0.39  | 0.13  | 0.06  | 0.13  | 0.06  | 0.20  | 0.13  | 0.17  | 0.21  |
| Er        | 1.53  | 0.64               | 0.76 | 0.37 | 0.55  | 0.40  | 1.21  | 0.43  | 0.21  | 0.36  | 0.19  | 0.60  | 0.38  | 0.48  | 0.60  |
| Tm        | 0.23  | 0.09               | 0.11 | 0.05 | 0.08  | 0.05  | 0.16  | 0.05  | 0.03  | 0.04  | 0.02  | 0.08  | 0.05  | 0.07  | 0.09  |
| Yb        | 1.51  | 0.53               | 0.73 | 0.36 | 0.53  | 0.35  | 1.12  | 0.38  | 0.26  | 0.28  | 0.17  | 0.56  | 0.34  | 0.47  | 0.55  |
| Lu        | 0.24  | 0.08               | 0.11 | 0.06 | 0.09  | 0.05  | 0.16  | 0.05  | 0.05  | 0.04  | 0.03  | 0.08  | 0.06  | 0.06  | 0.08  |
| Hf        | 3.00  | 1.66               | 1.90 | 2.20 | 1.67  | 1.52  | 2.09  | 3.20  | 2.18  | 2.13  | 1.37  | 1.91  | 1.79  | 2.26  | 2.17  |
| Ta        | 0.19  | 0.14               | 0.19 | 0.34 | 0.10  | 0.06  | 0.10  | 0.04  | 0.03  | 0.04  | 0.03  | 0.06  | 0.06  | 0.08  | 0.14  |

Table S3: Continued

| Location                            |       | Xuelongbao         |      |          |          |          |       |       |       |       |          |       |       |       |       |
|-------------------------------------|-------|--------------------|------|----------|----------|----------|-------|-------|-------|-------|----------|-------|-------|-------|-------|
| Sample                              | HL-14 | XL-4               | XL-6 | XL-7     | XL-19    | XL-20    | XL-21 | XL-25 | XL-26 | XL-28 | XL-29    | XL-34 | XL-35 | XL-36 | XL-38 |
| Rock type                           |       | Alkaine mafic rock |      |          |          |          |       |       |       |       |          |       |       |       |       |
| Reference                           |       | Zhou et al., 2006  |      |          |          |          |       |       |       |       |          |       |       |       |       |
| Age(Ma)                             |       | 748                |      |          |          |          |       |       |       |       |          |       |       |       |       |
| Pb                                  | 5.34  | 7.33               | 9.28 | 6.76     | 13.6     | 12.3     | 9.63  | 3.46  | 5.35  | 5.76  | 6.38     | 11.1  | 8.59  | 9.10  | 10.5  |
| Th                                  | 0.31  | 5.64               | 3.82 | 1.73     | 0.32     | 4.34     | 0.83  | 4.48  | 1.17  | 1.36  | 0.56     | 0.08  | 0.10  | 0.11  | 0.36  |
| U                                   |       | 0.48               | 0.64 | 0.62     | 0.55     | 0.21     | 0.20  | 0.27  | 0.21  | 0.18  | 0.07     | 0.21  | 0.25  | 0.29  | 0.53  |
| Isotopic date                       |       |                    |      |          |          |          |       |       |       |       |          |       |       |       |       |
| $^{87}\text{Sr}/^{86}\text{Sr}$ (t) |       | 0.703650           |      | 0.703610 | 0.703760 | 0.704210 |       |       |       |       | 0.703300 |       |       |       |       |
| $\epsilon_{\text{Nd}}$ (t)          |       | 2.54               |      | 2.87     | 2.88     | 2.33     |       |       |       |       | 1.66     |       |       |       |       |
| Ratio                               |       |                    |      |          |          |          |       |       |       |       |          |       |       |       |       |
| Mg#                                 | 56.9  | 52.0               | 53.4 | 55.8     | 43.6     | 45.2     | 52.3  | 42.0  | 46.1  | 49.0  | 40.7     | 42.5  | 44.3  | 51.9  | 47.0  |
| Sr/Y                                | 40.9  | 103                | 77.3 | 129      | 125      | 154      | 60.0  | 112   | 198   | 90.7  | 218      | 128   | 195   | 89.8  | 119   |
| Nb/La                               | 0.16  | 0.080              | 0.14 | 0.37     | 0.61     | 0.069    | 0.25  | 0.037 | 0.086 | 0.13  | 0.12     | 0.44  | 0.69  | 0.90  | 0.90  |
| Nb/U                                |       | 4.17               | 3.88 | 4.15     | 3.33     | 6.24     | 10.1  | 3.19  | 2.86  | 7.00  | 8.57     | 6.29  | 5.48  | 6.21  | 3.38  |

Table S3: Continued

| Location                       |        |       |       |       |        |        |        |        |       | Yaunmou pluton     |          |          |          |          |          |          |
|--------------------------------|--------|-------|-------|-------|--------|--------|--------|--------|-------|--------------------|----------|----------|----------|----------|----------|----------|
| Sample                         | XL-67  | XG-1  | XG-2  | XG-3  | XG5-1  | XG5-2  | XG5-3  | XG-6   | XG-7  | JWL16-51           | JWL16-52 | JWL16-53 | JWL16-54 | JWL16-55 | JWL16-56 | JWL16-57 |
| Rock type                      |        |       |       |       |        |        |        |        |       | Alkaine mafic rock |          |          |          |          |          |          |
| Reference                      |        |       |       |       |        |        |        |        |       | This study         |          |          |          |          |          |          |
| Age(Ma)                        |        |       |       |       |        |        |        |        |       | 806                |          |          |          |          |          |          |
| Major(wt.%)                    |        |       |       |       |        |        |        |        |       |                    |          |          |          |          |          |          |
| SiO <sub>2</sub>               | 68.00  | 64.50 | 67.50 | 65.20 | 64.80  | 74.80  | 65.10  | 65.70  | 65.90 | 48.69              | 49.07    | 47.90    | 48.19    | 49.04    | 48.18    | 45.76    |
| TiO <sub>2</sub>               | 0.32   | 0.39  | 0.31  | 0.39  | 0.47   | 0.08   | 0.44   | 0.37   | 0.42  | 2.46               | 3.23     | 2.13     | 3.39     | 3.26     | 3.28     | 3.18     |
| Al <sub>2</sub> O <sub>3</sub> | 16.61  | 17.32 | 16.56 | 16.99 | 16.05  | 14.33  | 16.42  | 17.04  | 16.61 | 10.84              | 9.46     | 11.60    | 10.10    | 9.43     | 9.89     | 11.48    |
| Fe2O3T                         | 3.13   | 3.63  | 2.90  | 3.38  | 4.11   | 0.97   | 3.87   | 3.60   | 3.37  | 12.61              | 12.37    | 12.67    | 12.60    | 12.48    | 12.49    | 16.03    |
| Fe <sub>2</sub> O <sub>3</sub> |        |       |       |       |        |        |        |        |       |                    |          |          |          |          |          |          |
| FeO                            |        |       |       |       |        |        |        |        |       |                    |          |          |          |          |          |          |
| MnO                            | 0.06   | 0.06  | 0.05  | 0.06  | 0.07   | 0.02   | 0.07   | 0.06   | 0.05  | 0.18               | 0.17     | 0.17     | 0.20     | 0.19     | 0.17     | 0.21     |
| MgO                            | 1.53   | 1.35  | 0.99  | 1.31  | 2.30   | 0.21   | 2.11   | 1.41   | 1.29  | 9.70               | 9.49     | 9.67     | 8.72     | 9.50     | 9.41     | 7.04     |
| CaO                            | 3.52   | 4.86  | 4.00  | 4.69  | 4.55   | 2.10   | 4.74   | 5.00   | 4.35  | 9.42               | 10.33    | 9.21     | 9.62     | 10.34    | 10.02    | 8.97     |
| Na <sub>2</sub> O              | 4.37   | 5.56  | 4.82  | 4.57  | 6.23   | 6.23   | 5.64   | 5.83   | 4.70  | 2.00               | 1.36     | 2.25     | 1.77     | 1.44     | 1.61     | 2.64     |
| K <sub>2</sub> O               | 1.81   | 1.02  | 1.20  | 1.76  | 1.18   | 1.15   | 1.06   | 1.06   | 1.96  | 0.83               | 1.26     | 0.72     | 0.88     | 1.23     | 1.15     | 1.28     |
| P <sub>2</sub> O <sub>5</sub>  | 0.12   | 0.17  | 0.13  | 0.15  | 0.12   | 0.01   | 0.11   | 0.15   | 0.15  | 0.23               | 0.35     | 0.23     | 0.38     | 0.35     | 0.36     | 0.36     |
| LOI                            | 1.60   | 0.86  | 0.67  | 0.89  | 0.79   | 0.69   | 0.77   | 0.70   | 0.98  | 2.33               | 1.55     | 2.13     | 2.40     | 1.70     | 1.94     | 2.55     |
| TOL                            | 101.10 | 99.70 | 99.10 | 99.40 | 100.70 | 100.60 | 100.30 | 100.90 | 99.80 | 99.27              | 98.63    | 98.69    | 98.24    | 98.95    | 98.50    | 99.49    |
| Trace(ppm)                     |        |       |       |       |        |        |        |        |       |                    |          |          |          |          |          |          |
| Li                             |        |       |       |       |        |        |        |        |       | 15.1               | 11.8     | 23.4     | 19.3     | 12.6     | 16.5     | 18.3     |
| Be                             |        |       |       |       |        |        |        |        |       | 1.55               | 1.38     | 1.55     | 1.85     | 1.50     | 1.63     | 2.16     |
| Sc                             | 8.96   | 7.88  | 5.19  | 7.04  | 12.3   | 6.27   | 11.0   | 9.38   | 8.69  | 32.8               | 36.4     | 32.4     | 33.7     | 35.5     | 33.6     | 38.5     |
| V                              |        |       |       |       |        |        |        |        |       | 369                | 398      | 375      | 394      | 397      | 381      | 629      |
| Cr                             |        |       |       |       |        |        |        |        |       | 912                | 925      | 912      | 805      | 924      | 881      | 412      |
| Co                             |        |       |       |       |        |        |        |        |       |                    |          |          |          |          |          |          |
| Ni                             |        |       |       |       |        |        |        |        |       | 215                | 85.2     | 232      | 69.0     | 80.6     | 80.1     | 147      |
| Cu                             |        |       |       |       |        |        |        |        |       | 133                | 34.7     | 131      | 24.5     | 35.6     | 49.5     | 277      |
| Zn                             |        |       |       |       |        |        |        |        |       | 155                | 135      | 128      | 148      | 141      | 134      | 201      |

Table S3: Continued

| Location  |       |      |      |      |       |       |       |      |      | Yaunmou pluton     |          |          |          |          |          |          |
|-----------|-------|------|------|------|-------|-------|-------|------|------|--------------------|----------|----------|----------|----------|----------|----------|
| Sample    | XL-67 | XG-1 | XG-2 | XG-3 | XG5-1 | XG5-2 | XG5-3 | XG-6 | XG-7 | JWL16-51           | JWL16-52 | JWL16-53 | JWL16-54 | JWL16-55 | JWL16-56 | JWL16-57 |
| Rock type |       |      |      |      |       |       |       |      |      | Alkaine mafic rock |          |          |          |          |          |          |
| Reference |       |      |      |      |       |       |       |      |      | This study         |          |          |          |          |          |          |
| Age(Ma)   |       |      |      |      |       |       |       |      |      | 806                |          |          |          |          |          |          |
| Ga        | 2.44  | 1.72 | 1.18 | 1.95 | 2.35  | 1.48  | 2.35  | 1.85 | 2.47 | 19.3               | 19.6     | 19.7     | 21.8     | 19.9     | 20.7     | 25.6     |
| Ge        |       |      |      |      |       |       |       |      |      |                    |          |          |          |          |          |          |
| Rb        | 49.0  | 24.0 | 26.0 | 53.0 | 32.0  | 18.0  | 27.0  | 26.0 | 41.0 | 27.1               | 18.9     | 27.0     | 17.0     | 17.4     | 14.9     | 53.0     |
| Sr        | 551   | 701  | 664  | 775  | 460   | 322   | 480   | 675  | 611  | 370                | 621      | 321      | 538      | 651      | 573      | 445      |
| Y         | 6.29  | 5.84 | 2.09 | 5.75 | 9.73  | 4.28  | 9.30  | 6.98 | 6.43 | 23.1               | 25.5     | 24.8     | 26.2     | 25.7     | 25.3     | 30.2     |
| Zr        | 90.0  | 52.0 | 53.0 | 72.0 | 59.0  | 47.0  | 33.0  | 35.0 | 54.0 | 211                | 347      | 171      | 372      | 351      | 357      | 270      |
| Nb        | 2.44  | 1.72 | 1.18 | 1.95 | 2.35  | 1.48  | 2.35  | 1.85 | 2.47 | 20.5               | 33.0     | 15.7     | 35.4     | 33.1     | 33.7     | 41.9     |
| Sn        |       |      |      |      |       |       |       |      |      |                    |          |          |          |          |          |          |
| Cs        |       |      |      |      |       |       |       |      |      | 0.57               | 0.23     | 0.75     | 0.22     | 0.25     | 0.26     | 1.52     |
| Ba        | 745   | 495  | 570  | 465  | 608   | 849   | 549   | 385  | 932  | 268                | 962      | 779      | 498      | 1260     | 533      | 418      |
| La        | 14.0  | 2.00 | 19.0 | 2.00 | 9.00  | 7.00  | 11.0  | 12.0 | 13.0 | 23.8               | 43.3     | 20.3     | 46.6     | 45.3     | 43.6     | 43.1     |
| Ce        | 27.0  | 6.00 | 36.0 | 4.00 | 19.0  | 14.0  | 24.0  | 24.0 | 26.0 | 54.5               | 95.9     | 42.8     | 105      | 99.5     | 101      | 91.9     |
| Pr        |       |      |      |      |       |       |       |      |      | 6.86               | 12.6     | 5.87     | 13.3     | 13.1     | 12.8     | 10.9     |
| Nd        | 11.0  | 5.00 | 14.0 | 3.00 | 11.0  | 6.00  | 13.0  | 11.0 | 13.0 | 30.4               | 54.0     | 25.4     | 57.8     | 56.0     | 54.9     | 44.5     |
| Sm        | 2.02  | 1.50 | 1.67 | 0.90 | 2.46  | 0.92  | 2.52  | 2.07 | 2.53 | 6.64               | 10.2     | 5.82     | 10.6     | 11.0     | 10.4     | 8.80     |
| Eu        | 0.56  | 0.63 | 0.52 | 0.40 | 0.79  | 0.54  | 0.77  | 0.63 | 0.78 | 1.94               | 2.79     | 1.78     | 3.06     | 2.97     | 2.88     | 2.49     |
| Gd        | 1.90  | 1.32 | 1.17 | 0.75 | 2.27  | 0.75  | 2.21  | 1.75 | 2.11 | 6.50               | 9.58     | 6.08     | 9.54     | 10.0     | 9.25     | 8.83     |
| Tb        | 0.22  | 0.22 | 0.12 | 0.12 | 0.36  | 0.11  | 0.33  | 0.26 | 0.29 | 0.98               | 1.34     | 0.94     | 1.33     | 1.32     | 1.34     | 1.28     |
| Dy        | 1.09  | 1.29 | 0.50 | 0.63 | 2.10  | 0.67  | 1.93  | 1.43 | 1.56 | 5.16               | 6.31     | 5.23     | 6.65     | 6.87     | 6.61     | 7.21     |
| Ho        | 0.23  | 0.26 | 0.09 | 0.13 | 0.44  | 0.16  | 0.37  | 0.29 | 0.27 | 0.91               | 1.05     | 0.95     | 1.13     | 1.10     | 1.07     | 1.26     |
| Er        | 0.70  | 0.72 | 0.26 | 0.39 | 1.21  | 0.53  | 1.09  | 0.85 | 0.70 | 2.46               | 2.87     | 2.75     | 2.92     | 3.02     | 3.03     | 3.61     |
| Tm        | 0.09  | 0.10 | 0.04 | 0.06 | 0.17  | 0.08  | 0.15  | 0.11 | 0.09 | 0.31               | 0.35     | 0.35     | 0.37     | 0.35     | 0.35     | 0.47     |
| Yb        | 0.71  | 0.62 | 0.22 | 0.40 | 1.09  | 0.61  | 0.98  | 0.74 | 0.48 | 1.98               | 2.22     | 2.17     | 2.17     | 2.27     | 2.16     | 3.03     |
| Lu        | 0.10  | 0.10 | 0.04 | 0.06 | 0.18  | 0.11  | 0.16  | 0.10 | 0.08 | 0.29               | 0.33     | 0.34     | 0.30     | 0.33     | 0.32     | 0.45     |
| Hf        | 2.66  | 1.53 | 1.63 | 1.35 | 2.13  | 1.76  | 1.16  | 1.10 | 1.52 | 5.07               | 9.84     | 4.47     | 9.68     | 9.23     | 9.54     | 7.42     |
| Ta        | 0.23  | 0.11 | 0.08 | 0.10 | 0.19  | 0.13  | 0.21  | 0.18 | 0.11 | 1.22               | 2.25     | 0.99     | 2.33     | 2.18     | 2.25     | 2.69     |

Table S3: Continued

| Location                               |          |      |          |      |       |       |       |      |      | Yaunmou pluton     |          |          |          |          |          |          |
|----------------------------------------|----------|------|----------|------|-------|-------|-------|------|------|--------------------|----------|----------|----------|----------|----------|----------|
| Sample                                 | XL-67    | XG-1 | XG-2     | XG-3 | XG5-1 | XG5-2 | XG5-3 | XG-6 | XG-7 | JWL16-51           | JWL16-52 | JWL16-53 | JWL16-54 | JWL16-55 | JWL16-56 | JWL16-57 |
| Rock type                              |          |      |          |      |       |       |       |      |      | Alkaine mafic rock |          |          |          |          |          |          |
| Reference                              |          |      |          |      |       |       |       |      |      | This study         |          |          |          |          |          |          |
| Age(Ma)                                |          |      |          |      |       |       |       |      |      | 806                |          |          |          |          |          |          |
| Pb                                     | 8.85     | 9.45 | 9.14     | 9.99 | 7.75  | 8.03  | 7.91  | 10.8 | 8.92 | 3.39               | 5.28     | 2.95     | 10.1     | 6.16     | 5.11     | 5.65     |
| Th                                     | 3.99     | 0.21 | 5.04     | 0.33 | 2.07  | 2.20  | 2.72  | 3.23 | 2.31 | 3.55               | 5.91     | 2.35     | 6.39     | 6.05     | 6.17     | 7.35     |
| U                                      | 0.70     | 0.49 | 0.86     | 0.67 | 0.94  | 0.62  | 0.94  | 0.78 | 0.27 | 0.83               | 1.36     | 0.51     | 1.89     | 1.40     | 1.46     | 1.68     |
| Isotopic date                          |          |      |          |      |       |       |       |      |      |                    |          |          |          |          |          |          |
| <sup>87</sup> Sr/ <sup>86</sup> Sr (t) | 0.704730 |      | 0.705430 |      |       |       |       |      |      |                    |          |          |          |          |          |          |
| ε <sub>Nd</sub> (t)                    | 1.07     |      | 0.36     |      |       |       |       |      |      |                    |          |          |          |          |          |          |
| Ratio                                  |          |      |          |      |       |       |       |      |      |                    |          |          |          |          |          |          |
| Mg#                                    | 53.3     | 46.4 | 44.3     | 47.5 | 56.6  | 33.5  | 56.0  | 47.7 | 47.1 | 64.2               | 64.1     | 64.0     | 61.7     | 64.0     | 63.7     | 50.6     |
| Sr/Y                                   | 87.6     | 120  | 318      | 135  | 47.3  | 75.2  | 51.6  | 96.7 | 95.0 | 16.0               | 24.4     | 13.0     | 20.5     | 25.4     | 22.7     | 14.8     |
| Nb/La                                  | 0.17     | 0.86 | 0.062    | 0.98 | 0.26  | 0.21  | 0.21  | 0.15 | 0.19 | 0.86               | 0.76     | 0.77     | 0.76     | 0.73     | 0.77     | 0.97     |
| Nb/U                                   | 3.49     | 3.51 | 1.37     | 2.91 | 2.50  | 2.39  | 2.50  | 2.37 | 9.15 | 24.7               | 24.2     | 30.9     | 18.7     | 23.7     | 23.2     | 24.9     |

Table S3: Continued

| Location                       |          | Suxiong basalt     |         |         |         |          |          |                     |          |          |          |          |          |         |         |         |  |
|--------------------------------|----------|--------------------|---------|---------|---------|----------|----------|---------------------|----------|----------|----------|----------|----------|---------|---------|---------|--|
| Sample                         | JWL16-58 | YM18-01            | YM18-02 | YM18-03 | YM18-04 | 99KD22-1 | 99KD22-2 | 99KD22-3            | 99KD22-4 | 99KD22-5 | 99KD22-6 | 99KD22-7 | 99KD22-8 | XC06-23 | XC06-24 | XC06-25 |  |
| Rock type                      |          | Alkaine mafic rock |         |         |         |          |          | Alkaline mafic rock |          |          |          |          |          |         |         |         |  |
| Reference                      |          | This study         |         |         |         |          |          | Li et al. 2002      |          |          |          |          |          |         |         |         |  |
| Age(Ma)                        |          | 802                |         |         |         | 803      |          |                     |          |          |          |          |          |         | 795     |         |  |
| Major(wt.%)                    |          |                    |         |         |         |          |          |                     |          |          |          |          |          |         |         |         |  |
| SiO <sub>2</sub>               | 48.72    | 49.54              | 49.22   | 48.04   | 49.36   | 45.15    | 43.96    | 43.36               | 46.94    | 42.43    | 45.06    | 44.18    | 48.35    | 47.84   | 47.85   | 47.69   |  |
| TiO <sub>2</sub>               | 2.61     | 2.44               | 2.31    | 2.24    | 2.37    | 2.70     | 2.69     | 2.81                | 2.52     | 2.44     | 3.03     | 2.48     | 2.78     | 3.95    | 3.94    | 3.94    |  |
| Al <sub>2</sub> O <sub>3</sub> | 12.38    | 13.36              | 12.25   | 11.73   | 12.45   | 13.38    | 12.89    | 13.77               | 12.18    | 13.31    | 14.58    | 14.55    | 14.17    | 13.60   | 13.59   | 13.67   |  |
| Fe2O3T                         | 12.91    | 11.77              | 11.79   | 12.08   | 11.92   | 15.17    | 17.12    | 14.10               | 14.03    | 11.85    | 15.57    | 14.46    | 13.08    | 12.40   | 12.44   | 12.43   |  |
| Fe <sub>2</sub> O <sub>3</sub> |          |                    |         |         |         |          |          |                     |          |          |          |          |          |         |         |         |  |
| FeO                            |          |                    |         |         |         |          |          |                     |          |          |          |          |          |         |         |         |  |
| MnO                            | 0.17     | 0.15               | 0.16    | 0.15    | 0.16    | 0.22     | 0.16     | 0.17                | 0.17     | 0.27     | 0.19     | 0.14     | 0.17     | 0.18    | 0.18    | 0.18    |  |
| MgO                            | 8.04     | 7.40               | 8.23    | 10.14   | 8.09    | 9.30     | 9.16     | 10.97               | 10.08    | 11.96    | 8.27     | 7.03     | 7.24     | 4.98    | 5.08    | 4.74    |  |
| CaO                            | 8.34     | 8.89               | 9.98    | 8.77    | 9.14    | 10.87    | 11.10    | 12.30               | 9.33     | 16.65    | 9.00     | 15.69    | 10.47    | 8.71    | 8.85    | 8.48    |  |
| Na <sub>2</sub> O              | 2.50     | 2.58               | 2.57    | 2.33    | 3.02    | 1.37     | 1.33     | 1.01                | 2.33     | 0.00     | 2.31     | 0.88     | 1.85     | 2.77    | 2.71    | 2.70    |  |
| K <sub>2</sub> O               | 1.26     | 0.92               | 0.86    | 1.15    | 0.73    | 1.38     | 1.15     | 1.12                | 2.06     | 0.67     | 1.67     | 0.36     | 1.40     | 1.55    | 1.55    | 1.64    |  |
| P <sub>2</sub> O <sub>5</sub>  | 0.28     | 0.25               | 0.24    | 0.23    | 0.24    | 0.34     | 0.43     | 0.44                | 0.52     | 0.54     | 0.38     | 0.35     | 0.31     | 0.58    | 0.58    | 0.61    |  |
| LOI                            | 2.42     | 2.65               | 2.20    | 2.70    | 2.24    | 2.05     | 2.20     | 3.01                | 2.78     | 3.05     | 2.98     | 2.51     | 1.85     | 1.97    | 1.82    | 2.46    |  |
| TOL                            | 99.62    | 99.94              | 99.79   | 99.56   | 99.73   | 99.90    | 99.98    | 100.06              | 100.16   | 100.12   | 100.05   | 100.13   | 99.84    | 98.53   | 98.59   | 98.54   |  |
| Trace(ppm)                     |          |                    |         |         |         |          |          |                     |          |          |          |          |          |         |         |         |  |
| Li                             | 14.5     | 11.0               | 10.9    | 15.7    | 10.4    |          |          |                     |          |          |          |          |          |         |         |         |  |
| Be                             | 1.22     | 1.41               | 1.28    | 1.18    | 1.37    |          |          |                     |          |          |          |          |          |         |         |         |  |
| Sc                             | 30.4     | 32.7               | 32.1    | 31.7    | 34.1    |          |          |                     |          |          |          |          |          | 28.0    | 28.0    | 28.0    |  |
| V                              | 383      | 306                | 294     | 284     | 315     | 252      | 255      | 233                 | 189      | 173      | 241      | 296      | 271      | 397     | 394     | 385     |  |
| Cr                             | 634      | 606                | 566     | 671     | 593     | 292      | 383      | 165                 | 277      | 102      | 284      | 275      | 290      | 32.0    | 37.0    | 28.0    |  |
| Co                             |          | 43.3               | 51.0    | 53.0    | 44.7    |          |          |                     |          |          |          |          |          | 44.0    | 45.0    | 43.0    |  |
| Ni                             | 145      | 164                | 173     | 371     | 248     | 295      | 285      | 178                 | 158      | 127      | 185      | 154      | 177      | 63.0    | 65.0    | 58.0    |  |
| Cu                             | 109      | 94.2               | 115     | 101     | 100     |          |          |                     |          |          |          |          |          | 155     | 170     | 148     |  |
| Zn                             | 141      | 97.5               | 96.6    | 105     | 102     |          |          |                     |          |          |          |          |          | 130     | 131     | 129     |  |



Table S3: Continued

| Location  |          | Suxiong basalt     |         |         |         |          |                     |          |          |          |          |          |          |         |         |         |
|-----------|----------|--------------------|---------|---------|---------|----------|---------------------|----------|----------|----------|----------|----------|----------|---------|---------|---------|
| Sample    | JWL16-58 | YM18-01            | YM18-02 | YM18-03 | YM18-04 | 99KD22-1 | 99KD22-2            | 99KD22-3 | 99KD22-4 | 99KD22-5 | 99KD22-6 | 99KD22-7 | 99KD22-8 | XC06-23 | XC06-24 | XC06-25 |
| Rock type |          | Alkaine mafic rock |         |         |         |          | Alkaline mafic rock |          |          |          |          |          |          |         |         |         |
| Reference |          | This study         |         |         |         |          | Li et al. 2002      |          |          |          |          |          |          |         |         |         |
| Age(Ma)   |          | 802                |         |         |         | 803      |                     |          |          |          |          |          |          | 795     |         |         |
| Ga        | 20.8     | 20.6               | 19.4    | 19.0    | 20.9    | 18.7     | 20.4                | 18.8     | 14.5     | 18.8     | 17.1     | 21.7     | 18.7     |         |         |         |
| Ge        |          |                    |         |         |         |          |                     |          |          |          |          |          |          |         |         |         |
| Rb        | 50.8     | 31.1               | 24.9    | 40.7    | 17.5    | 42.8     | 56.1                | 29.8     | 57.8     | 20.4     | 54.8     | 11.7     | 23.8     | 26.0    | 27.0    | 31.0    |
| Sr        | 466      | 411                | 428     | 459     | 591     | 439      | 362                 | 376      | 250      | 701      | 304      | 751      | 635      | 710     | 703     | 695     |
| Y         | 25.2     | 27.5               | 26.2    | 26.7    | 28.8    | 24.2     | 21.1                | 21.8     | 21.1     | 19.4     | 19.9     | 21.8     | 22.6     | 33.0    | 31.0    | 31.0    |
| Zr        | 216      | 196                | 197     | 184     | 209     | 188      | 185                 | 215      | 201      | 194      | 198      | 168      | 192      | 356     | 360     | 360     |
| Nb        | 21.9     | 27.4               | 26.1    | 25.7    | 28.2    | 26.8     | 29.2                | 32.5     | 30.1     | 29.1     | 27.1     | 24.3     | 26.5     | 35.0    | 36.0    | 36.0    |
| Sn        |          |                    |         |         |         |          |                     |          |          |          |          |          |          |         |         |         |
| Cs        | 0.87     | 0.59               | 0.47    | 0.74    | 0.19    | 10.4     | 20.7                | 7.78     | 17.9     | 5.44     | 13.1     | 2.78     | 1.13     |         |         |         |
| Ba        | 853      | 210                | 552     | 2030    | 1360    | 420      | 164                 | 193      | 348      | 64.2     | 183      | 86.8     | 335      | 524     | 519     | 559     |
| La        | 25.6     | 33.8               | 30.3    | 30.8    | 33.5    | 22.5     | 28.4                | 26.0     | 26.7     | 26.8     | 23.6     | 23.4     | 22.4     | 46.0    | 47.0    | 49.0    |
| Ce        | 54.9     | 65.4               | 64.5    | 62.8    | 68.1    | 51.4     | 59.5                | 57.4     | 58.5     | 60.1     | 50.0     | 49.4     | 49.7     | 106     | 106     | 115     |
| Pr        | 7.35     | 7.93               | 7.46    | 7.45    | 8.09    | 6.48     | 7.53                | 6.83     | 7.39     | 7.30     | 6.22     | 6.09     | 6.14     | 14.0    | 15.0    | 16.0    |
| Nd        | 32.6     | 33.5               | 31.5    | 31.2    | 33.8    | 29.2     | 32.6                | 29.6     | 32.7     | 30.9     | 27.9     | 26.8     | 27.4     | 62.0    | 65.0    | 68.0    |
| Sm        | 7.30     | 6.96               | 6.61    | 6.74    | 7.24    | 6.17     | 6.44                | 6.07     | 6.28     | 6.13     | 5.79     | 5.52     | 5.70     | 12.0    | 12.0    | 13.0    |
| Eu        | 2.19     | 1.93               | 1.87    | 1.99    | 2.15    | 1.95     | 1.87                | 1.91     | 1.97     | 1.85     | 1.46     | 1.61     | 2.03     | 3.40    | 3.37    | 3.55    |
| Gd        | 7.09     | 6.12               | 5.78    | 5.92    | 6.44    | 5.80     | 5.99                | 5.67     | 5.70     | 5.40     | 5.28     | 5.25     | 5.57     | 9.95    | 10.1    | 10.8    |
| Tb        | 1.06     | 0.91               | 0.82    | 0.88    | 0.94    | 0.86     | 0.84                | 0.80     | 0.79     | 0.76     | 0.72     | 0.75     | 0.81     | 1.43    | 1.41    | 1.51    |
| Dy        | 5.73     | 5.35               | 4.94    | 4.96    | 5.31    | 4.59     | 4.18                | 4.16     | 4.06     | 3.77     | 3.84     | 4.11     | 4.35     | 7.59    | 7.65    | 8.07    |
| Ho        | 1.06     | 1.03               | 0.96    | 0.98    | 1.07    | 0.84     | 0.73                | 0.74     | 0.70     | 0.64     | 0.72     | 0.72     | 0.79     | 1.31    | 1.35    | 1.42    |
| Er        | 2.88     | 2.58               | 2.43    | 2.57    | 2.63    | 2.11     | 1.80                | 1.86     | 1.78     | 1.67     | 1.90     | 1.85     | 2.11     | 3.31    | 3.41    | 3.62    |
| Tm        | 0.36     | 0.37               | 0.36    | 0.34    | 0.37    | 0.29     | 0.25                | 0.28     | 0.26     | 0.24     | 0.27     | 0.27     | 0.31     | 0.48    | 0.49    | 0.50    |
| Yb        | 2.29     | 2.27               | 2.01    | 2.16    | 2.25    | 1.68     | 1.34                | 1.49     | 1.41     | 1.32     | 1.53     | 1.42     | 1.75     | 2.59    | 2.77    | 2.82    |
| Lu        | 0.33     | 0.31               | 0.29    | 0.29    | 0.31    | 0.25     | 0.19                | 0.22     | 0.21     | 0.19     | 0.23     | 0.21     | 0.26     | 0.38    | 0.40    | 0.41    |
| Hf        | 5.72     | 4.81               | 4.82    | 4.61    | 5.16    | 4.20     | 4.18                | 4.52     | 4.32     | 4.19     | 4.44     | 3.72     | 4.44     | 9.15    | 9.11    | 9.73    |
| Ta        | 1.43     | 1.62               | 1.53    | 1.51    | 1.61    | 1.71     | 1.88                | 2.12     | 1.90     | 1.83     | 1.77     | 1.54     | 1.71     | 2.18    | 2.23    | 2.35    |

Table S3: Continued

| Location                            |          |                    |         |         |         |          |                     |          |          |          |          |          |          |          |          |         |
|-------------------------------------|----------|--------------------|---------|---------|---------|----------|---------------------|----------|----------|----------|----------|----------|----------|----------|----------|---------|
| Suxiong basalt                      |          |                    |         |         |         |          |                     |          |          |          |          |          |          |          |          |         |
| Sample                              | JWL16-58 | YM18-01            | YM18-02 | YM18-03 | YM18-04 | 99KD22-1 | 99KD22-2            | 99KD22-3 | 99KD22-4 | 99KD22-5 | 99KD22-6 | 99KD22-7 | 99KD22-8 | XC06-23  | XC06-24  | XC06-25 |
| Rock type                           |          | Alkaine mafic rock |         |         |         |          | Alkaline mafic rock |          |          |          |          |          |          |          |          |         |
| Reference                           |          | This study         |         |         |         |          | Li et al. 2002      |          |          |          |          |          |          |          |          |         |
| Age(Ma)                             |          | 802                |         |         |         | 803      |                     |          |          |          |          |          |          | 795      |          |         |
| Pb                                  | 3.77     | 2.79               | 2.89    | 3.35    | 4.04    |          |                     |          |          |          |          |          |          | 6.97     | 6.57     | 7.16    |
| Th                                  | 3.49     | 4.53               | 4.45    | 4.25    | 4.79    | 2.18     | 2.20                | 2.70     | 2.48     | 2.41     | 2.39     | 2.06     | 2.19     | 6.30     | 6.33     | 6.82    |
| U                                   | 0.83     | 1.06               | 0.90    | 0.90    | 0.96    | 0.73     | 0.64                | 0.80     | 0.64     | 0.60     | 0.57     | 0.67     | 0.56     | 1.42     | 1.45     | 1.52    |
| Isotopic date                       |          |                    |         |         |         |          |                     |          |          |          |          |          |          |          |          |         |
| $^{87}\text{Sr}/^{86}\text{Sr}$ (t) |          |                    |         |         |         |          |                     |          |          |          |          |          |          | 0.703578 | 0.703396 |         |
| $\epsilon_{\text{Nd}}$ (t)          |          |                    |         |         | 0.00    |          |                     |          | 5.00     | 5.32     |          |          | 5.96     | 3.46     | 3.22     |         |
| Ratio                               |          |                    |         |         |         |          |                     |          |          |          |          |          |          |          |          |         |
| Mg#                                 | 59.2     | 59.5               | 61.9    | 66.2    | 61.3    | 58.8     | 55.5                | 64.5     | 62.6     | 70.2     | 55.3     | 53.1     | 56.3     | 48.3     | 48.8     | 47.1    |
| Sr/Y                                | 18.5     | 14.9               | 16.3    | 17.2    | 20.5    | 18.1     | 17.2                | 17.2     | 11.8     | 36.1     | 15.3     | 34.4     | 28.1     | 21.5     | 22.7     | 22.4    |
| Nb/La                               | 0.86     | 0.81               | 0.86    | 0.83    | 0.84    | 1.19     | 1.03                | 1.25     | 1.13     | 1.09     | 1.15     | 1.04     | 1.18     | 0.76     | 0.77     | 0.73    |
| Nb/U                                | 26.5     | 25.8               | 29.0    | 28.6    | 29.2    | 36.7     | 45.6                | 40.6     | 47.0     | 48.5     | 47.5     | 36.3     | 47.3     | 24.6     | 24.8     | 23.7    |

**Table S3: Continued**

| Location                       | Xichang dike       |         |         |         | Yanbian dike       |       |       |       |        |       |       |         |         |         |         |  |
|--------------------------------|--------------------|---------|---------|---------|--------------------|-------|-------|-------|--------|-------|-------|---------|---------|---------|---------|--|
| Sample                         | XC06-26            | XC07-27 | XC07-28 | XC07-29 | 04HS-09            | HT-01 | HT-02 | HT-03 | HT-04  | HT-05 | DW-01 | 07DW-01 | XC03-11 | XC03-12 | XC03-13 |  |
| Rock type                      | Alkaine mafic rock |         |         |         | Alkaine mafic rock |       |       |       |        |       |       |         |         |         |         |  |
| Reference                      | Li et al., 2019    |         |         |         | Zhu et al., 2008   |       |       |       |        |       |       |         |         |         |         |  |
| Age(Ma)                        | 791                |         |         |         | 792                |       |       |       |        |       |       |         |         | 785     |         |  |
| Major(wt.%)                    |                    |         |         |         |                    |       |       |       |        |       |       |         |         |         |         |  |
| SiO <sub>2</sub>               | 47.62              | 50.75   | 51.08   | 50.60   | 48.02              | 47.10 | 47.01 | 49.73 | 47.36  | 46.64 | 47.40 | 48.38   | 48.47   | 45.76   | 45.21   |  |
| TiO <sub>2</sub>               | 3.96               | 3.75    | 3.76    | 3.70    | 2.57               | 2.58  | 2.73  | 2.04  | 2.66   | 2.36  | 2.03  | 2.39    | 2.74    | 2.59    | 2.87    |  |
| Al <sub>2</sub> O <sub>3</sub> | 13.60              | 13.57   | 13.26   | 13.37   | 12.63              | 13.63 | 14.22 | 14.64 | 13.79  | 12.18 | 12.21 | 12.26   | 13.40   | 14.01   | 13.79   |  |
| Fe2O3T                         | 12.51              | 12.32   | 12.30   | 12.18   | 12.86              | 12.50 | 12.36 | 11.66 | 13.69  | 12.30 | 11.30 | 12.29   | 13.60   | 12.55   | 13.40   |  |
| Fe <sub>2</sub> O <sub>3</sub> |                    |         |         |         |                    |       |       |       |        |       |       |         |         |         |         |  |
| FeO                            |                    |         |         |         |                    |       |       |       |        |       |       |         |         |         |         |  |
| MnO                            | 0.18               | 0.17    | 0.17    | 0.16    | 0.34               | 0.38  | 0.46  | 0.52  | 0.38   | 0.21  | 0.16  | 0.16    | 0.27    | 0.22    | 0.24    |  |
| MgO                            | 4.77               | 4.04    | 4.13    | 4.13    | 8.67               | 6.78  | 8.53  | 7.21  | 8.72   | 8.83  | 10.09 | 8.80    | 5.10    | 5.30    | 5.53    |  |
| CaO                            | 8.52               | 7.69    | 7.77    | 8.07    | 9.57               | 8.74  | 5.95  | 5.38  | 6.91   | 10.33 | 10.32 | 8.93    | 7.33    | 12.50   | 11.27   |  |
| Na <sub>2</sub> O              | 2.56               | 2.35    | 2.18    | 2.08    | 2.34               | 3.57  | 3.32  | 3.00  | 2.56   | 2.11  | 2.09  | 2.46    | 3.43    | 2.22    | 2.48    |  |
| K <sub>2</sub> O               | 1.69               | 1.93    | 1.96    | 1.96    | 1.13               | 1.06  | 1.09  | 1.76  | 1.10   | 0.64  | 0.84  | 1.12    | 1.88    | 0.86    | 0.67    |  |
| P <sub>2</sub> O <sub>5</sub>  | 0.59               | 0.43    | 0.43    | 0.42    | 0.25               | 0.29  | 0.32  | 0.39  | 0.31   | 0.26  | 0.23  | 0.28    | 0.51    | 0.39    | 0.45    |  |
| LOI                            | 2.43               | 1.26    | 1.78    | 1.58    | 2.83               | 3.08  | 3.31  | 3.23  | 2.70   | 2.63  | 2.53  | 2.87    | 1.38    | 1.65    | 1.82    |  |
| TOL                            | 98.43              | 98.91   | 99.35   | 98.69   | 101.21             | 99.71 | 99.31 | 99.56 | 100.17 | 98.49 | 99.20 | 99.94   | 98.11   | 98.05   | 97.73   |  |
| Trace(ppm)                     |                    |         |         |         |                    |       |       |       |        |       |       |         |         |         |         |  |
| Li                             |                    |         |         |         |                    |       |       |       |        |       |       |         |         |         |         |  |
| Be                             |                    |         |         |         |                    |       |       |       |        |       |       |         |         |         |         |  |
| Sc                             | 27.0               | 29.0    | 28.0    | 30.0    | 29.6               | 24.5  | 23.2  | 23.2  | 25.8   | 28.3  | 31.5  | 32.3    | 27.0    | 25.0    | 29.0    |  |
| V                              | 385                | 381     | 355     | 386     | 319                | 309   | 295   | 228   | 300    | 306   | 238   | 329     | 344     | 379     | 388     |  |
| Cr                             | 32.0               | 30.0    | 29.0    | 32.0    | 438                | 221   | 139   | 210   | 227    | 471   | 637   | 547     | 36.0    | 72.0    | 66.0    |  |
| Co                             | 44.0               | 44.0    | 42.0    | 45.0    | 55.4               | 47.6  | 67.7  | 53.7  | 85.9   | 58.4  | 59.1  | 71.6    | 36.0    | 42.0    | 47.0    |  |
| Ni                             | 64.0               | 40.0    | 39.0    | 43.0    | 135                | 88.6  | 80.4  | 104   | 116    | 167   | 197   | 179     | 38.0    | 55.0    | 57.0    |  |
| Cu                             | 145                | 185     | 177     | 196     | 113                | 80.9  | 80.9  | 56.7  | 88.9   | 107   | 120   | 116     | 58.0    | 103     | 100     |  |
| Zn                             | 143                | 136     | 136     | 151     | 121                | 102   | 76.3  | 67.2  | 123    | 112   | 95.1  | 128     | 135     | 104     | 123     |  |

Table S3: Continued

| Location  | Xichang dike       |         |         |         | Yanbian dike       |       |       |       |       |       |       |         |         |         |         |
|-----------|--------------------|---------|---------|---------|--------------------|-------|-------|-------|-------|-------|-------|---------|---------|---------|---------|
| Sample    | XC06-26            | XC07-27 | XC07-28 | XC07-29 | 04HS-09            | HT-01 | HT-02 | HT-03 | HT-04 | HT-05 | DW-01 | 07DW-01 | XC03-11 | XC03-12 | XC03-13 |
| Rock type | Alkaine mafic rock |         |         |         | Alkaine mafic rock |       |       |       |       |       |       |         |         |         |         |
| Reference | Li et al., 2019    |         |         |         | Zhu et al., 2008   |       |       |       |       |       |       |         |         |         |         |
| Age(Ma)   | 791                |         |         |         | 792                |       |       |       |       |       |       |         | 785     |         |         |
| Ga        |                    |         |         |         | 18.2               | 20.1  | 20.9  | 18.9  | 20.8  | 18.4  | 16.0  | 22.5    |         |         |         |
| Ge        |                    |         |         |         |                    |       |       |       |       |       |       |         |         |         |         |
| Rb        | 32.0               | 81.0    | 84.0    | 80.0    | 21.8               | 18.8  | 21.2  | 33.4  | 24.2  | 11.5  | 14.5  | 19.5    | 52.0    | 17.0    | 18.0    |
| Sr        | 738                | 435     | 463     | 462     | 358                | 414   | 388   | 385   | 451   | 423   | 317   | 265     | 277     | 806     | 798     |
| Y         | 33.0               | 35.0    | 35.0    | 37.0    | 23.1               | 25.4  | 27.1  | 30.2  | 27.3  | 23.6  | 21.3  | 29.8    | 28.0    | 19.0    | 23.0    |
| Zr        | 364                | 368     | 357     | 369     | 189                | 222   | 249   | 234   | 241   | 195   | 162   | 241     | 157     | 101     | 117     |
| Nb        | 36.0               | 37.0    | 37.0    | 37.0    | 20.7               | 24.2  | 26.3  | 21.9  | 25.9  | 21.5  | 15.5  | 22.6    | 21.0    | 13.0    | 17.0    |
| Sn        |                    |         |         |         |                    |       |       |       |       |       |       |         |         |         |         |
| Cs        |                    |         |         |         | 0.83               | 0.46  | 0.44  | 0.75  | 1.03  | 0.77  | 0.56  | 0.64    |         |         |         |
| Ba        | 590                | 484     | 482     | 487     | 421                | 320   | 368   | 590   | 387   | 262   | 256   | 430     | 793     | 246     | 324     |
| La        | 47.0               | 49.0    | 47.0    | 48.0    | 24.8               | 27.4  | 30.6  | 29.8  | 29.6  | 26.3  | 17.1  | 25.3    | 31.0    | 20.0    | 23.0    |
| Ce        | 109                | 114     | 111     | 112     | 54.3               | 61.5  | 64.8  | 63.9  | 62.9  | 56.8  | 37.8  | 57.9    | 61.0    | 42.0    | 49.0    |
| Pr        | 15.0               | 15.0    | 15.0    | 15.0    | 7.00               | 7.93  | 8.45  | 8.46  | 8.22  | 7.33  | 5.32  | 7.79    | 8.00    | 6.00    | 6.00    |
| Nd        | 63.0               | 61.0    | 61.0    | 63.0    | 32.5               | 35.7  | 34.4  | 35.8  | 33.8  | 33.3  | 25.4  | 33.7    | 38.0    | 26.0    | 28.0    |
| Sm        | 12.0               | 12.0    | 11.0    | 12.0    | 7.10               | 7.71  | 7.35  | 8.04  | 7.38  | 7.25  | 5.75  | 7.61    | 8.00    | 6.00    | 6.00    |
| Eu        | 3.44               | 3.12    | 3.01    | 3.07    | 1.88               | 2.13  | 2.40  | 2.20  | 2.41  | 1.90  | 1.65  | 2.32    | 2.77    | 2.09    | 2.38    |
| Gd        | 10.5               | 10.8    | 9.89    | 10.3    | 5.81               | 6.24  | 6.07  | 7.01  | 6.27  | 5.90  | 4.99  | 6.92    | 8.04    | 5.82    | 6.93    |
| Tb        | 1.43               | 1.50    | 1.42    | 1.46    | 0.86               | 0.93  | 0.98  | 1.08  | 0.98  | 0.88  | 0.75  | 1.15    | 1.05    | 0.77    | 0.86    |
| Dy        | 7.90               | 8.49    | 7.87    | 8.36    | 5.09               | 5.28  | 5.50  | 6.35  | 5.68  | 5.20  | 4.65  | 5.91    | 5.82    | 4.21    | 4.73    |
| Ho        | 1.39               | 1.51    | 1.41    | 1.45    | 0.91               | 0.99  | 1.06  | 1.23  | 1.07  | 0.91  | 0.80  | 1.20    | 1.13    | 0.76    | 0.88    |
| Er        | 3.46               | 3.97    | 3.72    | 3.80    | 2.35               | 2.63  | 2.66  | 3.16  | 2.75  | 2.40  | 2.06  | 2.87    | 2.96    | 2.10    | 2.33    |
| Tm        | 0.49               | 0.58    | 0.53    | 0.53    | 0.32               | 0.39  | 0.36  | 0.44  | 0.38  | 0.35  | 0.30  | 0.40    | 0.39    | 0.27    | 0.29    |
| Yb        | 2.73               | 3.36    | 3.09    | 3.29    | 1.97               | 2.33  | 2.09  | 2.70  | 2.15  | 2.03  | 1.73  | 2.41    | 2.51    | 1.70    | 1.89    |
| Lu        | 0.38               | 0.50    | 0.45    | 0.47    | 0.29               | 0.31  | 0.30  | 0.38  | 0.30  | 0.29  | 0.24  | 0.33    | 0.35    | 0.24    | 0.28    |
| Hf        | 9.37               | 9.64    | 9.49    | 9.68    | 4.48               | 5.01  | 6.42  | 6.38  | 6.23  | 4.75  | 4.00  | 5.69    | 4.21    | 2.80    | 3.21    |
| Ta        | 2.28               | 2.44    | 2.39    | 2.40    | 1.17               | 1.37  | 1.63  | 1.37  | 1.64  | 1.19  | 0.94  | 1.46    | 1.50    | 1.02    | 1.17    |

Table S3: Continued

| Location                            | Xichang dike       |          |         |          | Yanbian dike       |       |       |       |       |       |       |         |          |          |          |
|-------------------------------------|--------------------|----------|---------|----------|--------------------|-------|-------|-------|-------|-------|-------|---------|----------|----------|----------|
| Sample                              | XC06-26            | XC07-27  | XC07-28 | XC07-29  | 04HS-09            | HT-01 | HT-02 | HT-03 | HT-04 | HT-05 | DW-01 | 07DW-01 | XC03-11  | XC03-12  | XC03-13  |
| Rock type                           | Alkaine mafic rock |          |         |          | Alkaine mafic rock |       |       |       |       |       |       |         |          |          |          |
| Reference                           | Li et al., 2019    |          |         |          | Zhu et al., 2008   |       |       |       |       |       |       |         |          |          |          |
| Age(Ma)                             | 791                |          |         |          | 792                |       |       |       |       |       |       |         | 785      |          |          |
| Pb                                  | 7.11               | 5.63     | 7.60    | 7.65     | 3.93               | 3.06  | 11.6  | 7.58  | 4.53  | 4.63  | 2.31  | 4.53    | 4.06     | 6.94     | 5.06     |
| Th                                  | 6.62               | 9.43     | 8.72    | 9.08     | 3.08               | 3.73  | 3.56  | 4.17  | 3.51  | 3.38  | 2.11  | 3.05    | 3.15     | 1.83     | 2.03     |
| U                                   | 1.52               | 2.08     | 1.99    | 2.03     | 0.73               | 0.89  | 0.85  | 1.22  | 0.82  | 0.80  | 0.54  | 0.69    | 0.79     | 0.54     | 0.48     |
| Isotopic date                       |                    |          |         |          |                    |       |       |       |       |       |       |         |          |          |          |
| $^{87}\text{Sr}/^{86}\text{Sr}$ (t) |                    | 0.703296 |         | 0.703504 |                    |       |       |       |       |       |       |         | 0.705299 | 0.705431 | 0.704186 |
| $\epsilon_{\text{Nd}}$ (t)          |                    | 2.8      |         | 2.28     | 5.75               | 6.29  |       |       |       | 5.77  | 7.18  |         | 1.04     | 0.77     | 1.79     |
| Ratio                               |                    |          |         |          |                    |       |       |       |       |       |       |         |          |          |          |
| Mg#                                 | 47.1               | 43.3     | 43.9    | 44.1     | 61.1               | 55.8  | 61.7  | 59.0  | 59.7  | 62.6  | 67.5  | 62.5    | 46.6     | 49.6     | 49.0     |
| Sr/Y                                | 22.4               | 12.4     | 13.2    | 12.5     | 15.5               | 16.3  | 14.3  | 12.7  | 16.5  | 17.9  | 14.9  | 8.89    | 9.89     | 42.4     | 34.7     |
| Nb/La                               | 0.77               | 0.76     | 0.79    | 0.77     | 0.83               | 0.88  | 0.86  | 0.73  | 0.88  | 0.82  | 0.91  | 0.89    | 0.68     | 0.65     | 0.74     |
| Nb/U                                | 23.7               | 17.8     | 18.6    | 18.2     | 28.4               | 27.2  | 30.9  | 18.0  | 31.6  | 26.9  | 28.7  | 32.8    | 26.6     | 24.1     | 35.4     |

**Table S3: Continued**

| Location                       | Xichang dike       |         |         |         |                    |        |        |        | Datian dike |        |        |        |        |        |        |        |
|--------------------------------|--------------------|---------|---------|---------|--------------------|--------|--------|--------|-------------|--------|--------|--------|--------|--------|--------|--------|
| Sample                         | XC04-14            | XC04-15 | XC04-16 | XC04-17 | DT1206             | DT1413 | DT1414 | DT1415 | 11DT01      | DT1201 | DT1202 | DT1203 | DT1401 | DT1402 | DT1403 | DT1404 |
| Rock type                      | Alkaine mafic rock |         |         |         | Alkaine mafic rock |        |        |        |             |        |        |        |        |        |        |        |
| Reference                      | Li et al., 2019    |         |         |         | Yang et al., 2017  |        |        |        |             |        |        |        |        |        |        |        |
| Age(Ma)                        | 772                |         |         |         | 760                |        |        |        |             |        |        |        |        |        |        |        |
| Major(wt.%)                    |                    |         |         |         |                    |        |        |        |             |        |        |        |        |        |        |        |
| SiO <sub>2</sub>               | 44.97              | 45.34   | 45.20   | 45.07   | 42.27              | 42.70  | 42.20  | 43.00  | 48.66       | 46.48  | 47.95  | 48.13  | 48.30  | 47.90  | 48.20  | 48.30  |
| TiO <sub>2</sub>               | 4.45               | 4.60    | 4.60    | 4.61    | 1.73               | 1.77   | 1.76   | 1.82   | 2.40        | 2.56   | 2.27   | 2.29   | 2.29   | 2.26   | 2.27   | 2.23   |
| Al <sub>2</sub> O <sub>3</sub> | 10.91              | 11.04   | 11.03   | 11.01   | 4.96               | 5.06   | 5.00   | 5.25   | 14.01       | 12.16  | 13.55  | 13.66  | 13.70  | 13.60  | 13.55  | 13.90  |
| Fe2O3T                         | 12.19              | 12.38   | 12.37   | 12.39   | 13.76              | 13.74  | 13.76  | 13.76  | 12.24       | 13.55  | 12.30  | 12.22  | 12.34  | 12.30  | 12.10  | 11.97  |
| Fe <sub>2</sub> O <sub>3</sub> |                    |         |         |         |                    |        |        |        |             |        |        |        |        |        |        |        |
| FeO                            |                    |         |         |         |                    |        |        |        |             |        |        |        |        |        |        |        |
| MnO                            | 0.15               | 0.16    | 0.16    | 0.16    | 0.18               | 0.18   | 0.18   | 0.17   | 0.18        | 0.17   | 0.18   | 0.18   | 0.18   | 0.18   | 0.18   | 0.17   |
| MgO                            | 8.45               | 8.06    | 8.24    | 8.36    | 22.40              | 21.80  | 21.90  | 21.60  | 6.23        | 8.65   | 6.90   | 6.84   | 6.74   | 6.66   | 6.76   | 6.39   |
| CaO                            | 11.57              | 11.33   | 11.07   | 11.33   | 7.92               | 8.28   | 7.85   | 7.94   | 9.59        | 9.95   | 10.16  | 9.86   | 9.92   | 9.51   | 9.82   | 9.47   |
| Na <sub>2</sub> O              | 1.10               | 1.32    | 1.41    | 1.39    | 0.60               | 0.61   | 0.62   | 0.65   | 2.65        | 2.59   | 2.53   | 2.71   | 2.56   | 2.48   | 2.84   | 2.58   |
| K <sub>2</sub> O               | 1.59               | 1.55    | 1.43    | 1.39    | 0.22               | 0.23   | 0.22   | 0.21   | 1.15        | 0.85   | 1.00   | 1.24   | 1.03   | 1.08   | 1.21   | 1.26   |
| P <sub>2</sub> O <sub>5</sub>  | 0.30               | 0.31    | 0.32    | 0.32    | 0.16               | 0.16   | 0.16   | 0.16   | 0.25        | 0.30   | 0.25   | 0.27   | 0.25   | 0.25   | 0.25   | 0.25   |
| LOI                            | 2.11               | 1.92    | 1.87    | 1.91    | 5.21               | 4.60   | 4.80   | 4.34   | 1.87        | 2.28   | 2.41   | 2.24   | 2.30   | 2.14   | 1.92   | 1.93   |
| TOL                            | 98.29              | 98.53   | 98.23   | 98.42   | 99.41              | 99.13  | 98.45  | 98.90  | 99.24       | 99.54  | 99.50  | 99.64  | 99.61  | 98.36  | 99.10  | 98.45  |
| Trace(ppm)                     |                    |         |         |         |                    |        |        |        |             |        |        |        |        |        |        |        |
| Li                             |                    |         |         |         |                    |        |        |        |             |        |        |        |        |        |        |        |
| Be                             |                    |         |         |         |                    |        |        |        |             |        |        |        |        |        |        |        |
| Sc                             | 40.0               | 36.0    | 34.0    | 36.0    | 11.3               | 35.7   | 33.9   | 35.1   | 27.7        | 33.0   | 29.6   | 29.2   | 36.7   | 36.8   | 37.4   | 34.4   |
| V                              | 408                | 418     | 398     | 433     | 191                | 245    | 236    | 238    | 230         | 236    | 239    | 238    | 314    | 314    | 312    | 315    |
| Cr                             | 451                | 406     | 365     | 411     | 1960               | 2260   | 2230   | 2170   | 64.0        | 267    | 101    | 99.0   | 108    | 108    | 107    | 84.0   |
| Co                             | 57.0               | 53.0    | 56.0    | 62.0    | 119                | 115    | 118    | 117    | 48.6        | 51.1   | 48.3   | 47.5   | 47.6   | 47.9   | 46.5   | 45.7   |
| Ni                             | 198                | 181     | 198     | 202     | 726                | 1340   | 1470   | 1310   | 46.8        | 140    | 91.0   | 82.9   | 114    | 116    | 112    | 95.8   |
| Cu                             | 204                | 218     | 318     | 340     | 81.7               | 129    | 117    | 116    | 96.1        | 115    | 139    | 123    | 185    | 152    | 151    | 124    |
| Zn                             | 112                | 121     | 118     | 118     | 165                | 148    | 147    | 135    | 174         | 159    | 132    | 149    | 114    | 118    | 124    | 118    |

Table S3: Continued

| Location  | Xichang dike       |         |         |         |        |        |        |        | Datian dike        |        |        |        |        |        |        |        |
|-----------|--------------------|---------|---------|---------|--------|--------|--------|--------|--------------------|--------|--------|--------|--------|--------|--------|--------|
| Sample    | XC04-14            | XC04-15 | XC04-16 | XC04-17 | DT1206 | DT1413 | DT1414 | DT1415 | 11DT01             | DT1201 | DT1202 | DT1203 | DT1401 | DT1402 | DT1403 | DT1404 |
| Rock type | Alkaine mafic rock |         |         |         |        |        |        |        | Alkaine mafic rock |        |        |        |        |        |        |        |
| Reference | Li et al., 2019    |         |         |         |        |        |        |        | Yang et al., 2017  |        |        |        |        |        |        |        |
| Age(Ma)   | 772                |         |         |         |        |        |        |        | 760                |        |        |        |        |        |        |        |
| Ga        |                    |         |         |         | 9.64   | 9.87   | 9.72   | 9.78   | 19.7               | 18.4   | 19.6   | 19.7   | 20.2   | 20.4   | 19.8   | 20.7   |
| Ge        |                    |         |         |         |        |        |        |        |                    |        |        |        |        |        |        |        |
| Rb        | 56.0               | 47.0    | 42.0    | 45.0    | 8.69   | 8.48   | 7.29   | 4.80   | 36.4               | 23.4   | 35.2   | 41.2   | 33.6   | 32.7   | 41.0   | 44.2   |
| Sr        | 461                | 497     | 547     | 576     | 168    | 170    | 173    | 172    | 576                | 535    | 546    | 515    | 593    | 560    | 520    | 572    |
| Y         | 24.0               | 25.0    | 28.0    | 33.0    | 15.3   | 15.8   | 12.7   | 12.2   | 23.2               | 24.1   | 23.1   | 23.0   | 23.7   | 23.6   | 23.3   | 23.6   |
| Zr        | 294                | 294     | 294     | 320     | 87.7   | 93.4   | 91.4   | 98.9   | 183                | 215    | 186    | 186    | 188    | 191    | 187    | 200    |
| Nb        | 23.0               | 24.0    | 22.0    | 24.0    | 15.4   | 15.0   | 14.5   | 15.4   | 29.4               | 30.2   | 27.9   | 28.9   | 26.9   | 26.5   | 26.8   | 26.8   |
| Sn        |                    |         |         |         |        |        |        |        |                    |        |        |        |        |        |        |        |
| Cs        |                    |         |         |         | 2.87   | 2.79   | 2.63   | 1.47   | 0.53               | 0.14   | 0.37   | 0.69   | 0.39   | 0.30   | 0.46   | 0.85   |
| Ba        | 331                | 780     | 787     | 702     | 594    | 650    | 603    | 148    | 673                | 641    | 310    | 379    | 451    | 346    | 524    | 395    |
| La        | 37.0               | 40.0    | 50.0    | 48.0    | 17.5   | 17.3   | 16.0   | 15.7   | 35.6               | 30.7   | 31.1   | 32.2   | 32.1   | 31.9   | 30.8   | 31.8   |
| Ce        | 72.0               | 79.0    | 84.0    | 83.0    | 32.7   | 35.2   | 34.6   | 35.3   | 71.6               | 65.1   | 64.3   | 66.3   | 68.6   | 68.6   | 66.9   | 69.0   |
| Pr        | 11.0               | 11.0    | 14.0    | 13.0    | 4.94   | 4.50   | 4.41   | 4.24   | 8.16               | 8.85   | 8.06   | 8.38   | 7.90   | 8.15   | 7.84   | 8.10   |
| Nd        | 48.0               | 49.0    | 62.0    | 58.0    | 20.5   | 18.2   | 18.0   | 17.4   | 31.8               | 34.8   | 31.0   | 32.4   | 32.5   | 31.9   | 31.0   | 32.0   |
| Sm        | 10.0               | 11.0    | 13.0    | 12.0    | 4.46   | 3.55   | 3.70   | 3.68   | 6.19               | 7.65   | 6.52   | 6.44   | 6.15   | 6.13   | 5.81   | 6.11   |
| Eu        | 2.90               | 3.06    | 3.78    | 3.53    | 1.47   | 1.16   | 1.13   | 1.02   | 1.93               | 2.45   | 2.08   | 2.11   | 2.10   | 1.93   | 1.93   | 2.04   |
| Gd        | 9.21               | 9.59    | 11.1    | 11.0    | 4.54   | 3.41   | 3.60   | 3.38   | 6.15               | 6.94   | 6.30   | 6.56   | 5.95   | 5.23   | 5.64   | 5.41   |
| Tb        | 1.13               | 1.21    | 1.31    | 1.36    | 0.69   | 0.54   | 0.49   | 0.49   | 0.84               | 1.06   | 0.93   | 0.95   | 0.87   | 0.85   | 0.89   | 0.87   |
| Dy        | 5.69               | 6.18    | 6.97    | 6.96    | 3.40   | 2.84   | 2.78   | 2.43   | 4.76               | 5.10   | 4.61   | 4.56   | 4.76   | 4.64   | 4.60   | 4.46   |
| Ho        | 0.94               | 0.97    | 1.17    | 1.20    | 0.68   | 0.53   | 0.50   | 0.46   | 0.89               | 1.04   | 0.97   | 0.96   | 0.92   | 0.87   | 0.90   | 0.90   |
| Er        | 2.33               | 2.49    | 2.65    | 2.98    | 1.77   | 1.35   | 1.32   | 1.23   | 2.30               | 2.57   | 2.40   | 2.44   | 2.40   | 2.43   | 2.38   | 2.40   |
| Tm        | 0.29               | 0.31    | 0.36    | 0.38    | 0.22   | 0.19   | 0.16   | 0.15   | 0.30               | 0.32   | 0.32   | 0.33   | 0.33   | 0.33   | 0.33   | 0.31   |
| Yb        | 1.81               | 1.88    | 2.16    | 2.16    | 1.40   | 1.09   | 1.05   | 0.88   | 1.87               | 2.03   | 1.95   | 2.06   | 2.09   | 2.00   | 2.01   | 2.02   |
| Lu        | 0.24               | 0.26    | 0.29    | 0.30    | 0.19   | 0.13   | 0.12   | 0.12   | 0.27               | 0.30   | 0.29   | 0.30   | 0.28   | 0.27   | 0.29   | 0.28   |
| Hf        | 7.07               | 7.17    | 7.23    | 7.68    | 2.72   | 2.41   | 2.19   | 2.38   | 5.04               | 5.83   | 5.31   | 5.42   | 4.41   | 4.44   | 4.51   | 4.56   |
| Ta        | 1.70               | 1.80    | 1.80    | 1.87    | 0.97   | 0.84   | 0.84   | 0.95   | 1.42               | 1.81   | 1.63   | 1.74   | 1.51   | 1.50   | 1.49   | 1.48   |

Table S3: Continued

| Location                               | Xichang dike       |         |          |         |                    |        |        |        | Datian dike |        |        |        |        |        |        |        |
|----------------------------------------|--------------------|---------|----------|---------|--------------------|--------|--------|--------|-------------|--------|--------|--------|--------|--------|--------|--------|
| Sample                                 | XC04-14            | XC04-15 | XC04-16  | XC04-17 | DT1206             | DT1413 | DT1414 | DT1415 | 11DT01      | DT1201 | DT1202 | DT1203 | DT1401 | DT1402 | DT1403 | DT1404 |
| Rock type                              | Alkaine mafic rock |         |          |         | Alkaine mafic rock |        |        |        |             |        |        |        |        |        |        |        |
| Reference                              | Li et al., 2019    |         |          |         | Yang et al., 2017  |        |        |        |             |        |        |        |        |        |        |        |
| Age(Ma)                                | 772                |         |          |         | 760                |        |        |        |             |        |        |        |        |        |        |        |
| Pb                                     | 4.56               | 8.41    | 5.42     | 5.24    | 2.17               | 0.85   | 0.70   | 0.81   | 6.24        | 4.95   | 5.88   | 6.66   | 4.65   | 4.04   | 5.07   | 3.76   |
| Th                                     | 4.56               | 4.90    | 4.89     | 4.88    | 1.91               | 1.85   | 1.84   | 1.91   | 4.03        | 3.55   | 4.13   | 4.22   | 3.95   | 3.96   | 3.73   | 4.02   |
| U                                      | 0.92               | 0.94    | 1.02     | 0.98    | 0.50               | 0.41   | 0.41   | 0.48   | 0.94        | 1.11   | 0.89   | 0.93   | 0.88   | 0.93   | 1.15   | 0.87   |
| Isotopic date                          |                    |         |          |         |                    |        |        |        |             |        |        |        |        |        |        |        |
| <sup>87</sup> Sr/ <sup>86</sup> Sr (t) | 0.704229           |         | 0.704332 |         |                    |        |        |        |             |        |        |        |        |        |        |        |
| ε <sub>Nd</sub> (t)                    | 2.19               |         | 2.32     |         | 3                  | 4.4    |        |        | 4.8         |        |        | 4.3    |        |        |        |        |
| Ratio                                  |                    |         |          |         |                    |        |        |        |             |        |        |        |        |        |        |        |
| Mg#                                    | 61.8               | 60.3    | 60.8     | 61.1    | 79.1               | 78.7   | 78.8   | 78.5   | 54.3        | 59.8   | 56.7   | 56.6   | 56.0   | 55.8   | 56.6   | 55.4   |
| Sr/Y                                   | 19.2               | 19.9    | 19.5     | 17.5    | 11.0               | 10.8   | 13.6   | 14.1   | 24.8        | 22.2   | 23.6   | 22.4   | 25.0   | 23.7   | 22.3   | 24.2   |
| Nb/La                                  | 0.62               | 0.60    | 0.44     | 0.50    | 0.88               | 0.87   | 0.91   | 0.98   | 0.83        | 0.98   | 0.90   | 0.90   | 0.84   | 0.83   | 0.87   | 0.84   |
| Nb/U                                   | 25.0               | 25.5    | 21.6     | 24.5    | 30.8               | 36.6   | 35.4   | 32.1   | 31.3        | 27.2   | 31.3   | 31.1   | 30.6   | 28.5   | 23.3   | 30.8   |



Table S3: Continued

| Location                       |                 |        |        | Xichang dike |         |         |         |         |                    |         |         |         |         |         |         |
|--------------------------------|-----------------|--------|--------|--------------|---------|---------|---------|---------|--------------------|---------|---------|---------|---------|---------|---------|
| Sample                         | DT1405          | DT1406 | DT1407 | XC05-18      | XC05-19 | XC05-20 | XC05-21 | XC05-22 | XC01-01            | XC01-02 | XC01-03 | XC01-04 | XC01-05 | XC01-06 | XC02-07 |
| Rock type                      |                 |        |        |              |         |         |         |         | Alkaine mafic rock |         |         |         |         |         |         |
| Reference                      | Li et al., 2019 |        |        |              |         |         |         |         |                    |         |         |         |         |         |         |
| Age(Ma)                        | 760             |        |        |              |         |         |         |         | 751                |         |         |         |         |         |         |
| Major(wt.%)                    |                 |        |        |              |         |         |         |         |                    |         |         |         |         |         |         |
| SiO <sub>2</sub>               | 48.50           | 48.70  | 48.80  | 50.42        | 49.98   | 50.29   | 49.68   | 50.33   | 48.73              | 50.03   | 48.84   | 49.68   | 50.14   | 50.12   | 50.10   |
| TiO <sub>2</sub>               | 2.28            | 2.04   | 1.96   | 1.94         | 1.92    | 1.99    | 1.98    | 2.01    | 3.42               | 3.61    | 3.70    | 3.74    | 3.50    | 3.49    | 2.08    |
| Al <sub>2</sub> O <sub>3</sub> | 13.60           | 13.45  | 11.05  | 14.21        | 14.14   | 14.35   | 14.47   | 14.38   | 12.54              | 11.89   | 12.13   | 12.06   | 11.70   | 12.09   | 13.58   |
| Fe2O3T                         | 12.20           | 12.60  | 12.04  | 10.49        | 10.25   | 10.66   | 10.35   | 10.64   | 10.97              | 10.46   | 10.97   | 10.65   | 10.87   | 10.98   | 14.17   |
| Fe <sub>2</sub> O <sub>3</sub> |                 |        |        |              |         |         |         |         |                    |         |         |         |         |         |         |
| FeO                            |                 |        |        |              |         |         |         |         |                    |         |         |         |         |         |         |
| MnO                            | 0.18            | 0.18   | 0.17   | 0.16         | 0.16    | 0.16    | 0.16    | 0.17    | 0.17               | 0.16    | 0.18    | 0.15    | 0.17    | 0.16    | 0.19    |
| MgO                            | 6.81            | 7.35   | 9.59   | 6.51         | 6.25    | 6.36    | 6.06    | 6.46    | 7.05               | 6.74    | 7.06    | 6.62    | 7.11    | 6.94    | 4.27    |
| CaO                            | 9.81            | 9.75   | 10.70  | 8.30         | 9.13    | 8.70    | 9.25    | 8.76    | 7.30               | 7.58    | 7.55    | 7.56    | 7.16    | 7.63    | 7.54    |
| Na <sub>2</sub> O              | 2.69            | 2.54   | 2.29   | 2.96         | 2.49    | 2.66    | 3.16    | 2.65    | 1.57               | 1.38    | 1.75    | 1.59    | 1.98    | 1.88    | 3.01    |
| K <sub>2</sub> O               | 1.26            | 0.63   | 0.69   | 1.34         | 1.62    | 1.50    | 0.80    | 1.52    | 4.05               | 4.44    | 3.53    | 3.99    | 3.53    | 2.97    | 0.03    |
| P <sub>2</sub> O <sub>5</sub>  | 0.26            | 0.21   | 0.18   | 0.22         | 0.21    | 0.22    | 0.22    | 0.22    | 0.26               | 0.37    | 0.38    | 0.41    | 0.39    | 0.41    | 0.14    |
| LOI                            | 1.89            | 1.73   | 2.09   | 2.23         | 1.82    | 1.94    | 2.54    | 2.13    | 2.46               | 2.51    | 2.36    | 2.54    | 2.19    | 2.40    | 3.01    |
| TOL                            | 99.48           | 99.18  | 99.56  | 98.78        | 97.97   | 98.83   | 98.67   | 99.27   | 98.52              | 99.17   | 98.45   | 98.99   | 98.74   | 99.07   | 98.12   |
| Trace(ppm)                     |                 |        |        |              |         |         |         |         |                    |         |         |         |         |         |         |
| Li                             |                 |        |        |              |         |         |         |         |                    |         |         |         |         |         |         |
| Be                             |                 |        |        |              |         |         |         |         |                    |         |         |         |         |         |         |
| Sc                             | 36.7            | 37.1   | 43.7   | 31.0         | 32.0    | 32.0    | 31.0    | 30.0    | 27.0               | 27.0    | 27.0    | 28.0    | 28.0    | 28.0    | 31.0    |
| V                              | 312             | 334    | 309    | 354          | 314     | 351     | 348     | 345     | 307                | 295     | 307     | 307     | 299     | 302     | 383     |
| Cr                             | 126             | 296    | 614    | 131          | 133     | 96.0    | 81.0    | 78.0    | 372                | 326     | 333     | 336     | 347     | 333     | 14.0    |
| Co                             | 46.8            | 52.5   | 54.3   | 47.0         | 43.0    | 47.0    | 46.0    | 46.0    | 41.0               | 47.0    | 47.0    | 46.0    | 48.0    | 47.0    | 42.0    |
| Ni                             | 123             | 142    | 260    | 99.0         | 94.0    | 95.0    | 92.0    | 82.0    | 125                | 131     | 129     | 130     | 136     | 129     | 37.0    |
| Cu                             | 172             | 113    | 176    | 123          | 117     | 131     | 134     | 133     | 115                | 133     | 132     | 122     | 131     | 131     | 166     |
| Zn                             | 124             | 123    | 99.9   | 107          | 87.0    | 105     | 99.0    | 101     | 119                | 119     | 119     | 123     | 121     | 115     | 130     |

Table S3: Continued

| Location  |                    |        | Xichang dike |         |         |         |         |         |         |         |         |         |         |         |         |
|-----------|--------------------|--------|--------------|---------|---------|---------|---------|---------|---------|---------|---------|---------|---------|---------|---------|
| Sample    | DT1405             | DT1406 | DT1407       | XC05-18 | XC05-19 | XC05-20 | XC05-21 | XC05-22 | XC01-01 | XC01-02 | XC01-03 | XC01-04 | XC01-05 | XC01-06 | XC02-07 |
| Rock type | Alkaine mafic rock |        |              |         |         |         |         |         |         |         |         |         |         |         |         |
| Reference | Li et al., 2019    |        |              |         |         |         |         |         |         |         |         |         |         |         |         |
| Age(Ma)   | 760                |        |              |         |         |         |         | 751     |         |         |         |         |         |         |         |
| Ga        | 20.2               | 20.3   | 17.2         |         |         |         |         |         |         |         |         |         |         |         |         |
| Ge        |                    |        |              |         |         |         |         |         |         |         |         |         |         |         |         |
| Rb        | 37.7               | 22.0   | 17.0         | 54.0    | 59.0    | 59.0    | 18.0    | 48.0    | 82.0    | 88.0    | 77.0    | 83.0    | 75.0    | 69.0    | 5.00    |
| Sr        | 571                | 503    | 391          | 565     | 481     | 525     | 506     | 494     | 370     | 335     | 354     | 350     | 355     | 356     | 340     |
| Y         | 24.3               | 21.7   | 20.0         | 23.0    | 22.0    | 25.0    | 23.0    | 22.0    | 25.0    | 28.0    | 28.0    | 28.0    | 29.0    | 30.0    | 37.0    |
| Zr        | 195                | 171    | 157          | 144     | 143     | 144     | 149     | 150     | 376     | 339     | 351     | 350     | 346     | 343     | 188     |
| Nb        | 27.6               | 15.4   | 17.8         | 12.0    | 12.0    | 13.0    | 12.0    | 12.0    | 47.0    | 37.0    | 39.0    | 39.0    | 38.0    | 38.0    | 29.0    |
| Sn        |                    |        |              |         |         |         |         |         |         |         |         |         |         |         |         |
| Cs        | 0.74               | 0.59   | 0.36         |         |         |         |         |         |         |         |         |         |         |         |         |
| Ba        | 386                | 270    | 304          | 392     | 454     | 651     | 255     | 387     | 1530    | 1830    | 1610    | 1920    | 1300    | 1230    | 1010    |
| La        | 32.4               | 22.0   | 24.0         | 20.0    | 21.0    | 21.0    | 21.0    | 20.0    | 50.0    | 56.0    | 56.0    | 58.0    | 56.0    | 56.0    | 28.0    |
| Ce        | 69.3               | 50.7   | 54.0         | 45.0    | 46.0    | 47.0    | 48.0    | 47.0    | 104     | 125     | 126     | 131     | 124     | 122     | 51.0    |
| Pr        | 8.11               | 6.19   | 6.37         | 7.00    | 7.00    | 7.00    | 7.00    | 7.00    | 14.0    | 16.0    | 16.0    | 17.0    | 16.0    | 17.0    | 8.00    |
| Nd        | 32.5               | 26.1   | 26.3         | 30.0    | 31.0    | 32.0    | 33.0    | 32.0    | 56.0    | 64.0    | 66.0    | 68.0    | 65.0    | 66.0    | 33.0    |
| Sm        | 6.32               | 5.52   | 5.11         | 6.00    | 6.00    | 6.00    | 6.00    | 6.00    | 10.0    | 12.0    | 12.0    | 13.0    | 12.0    | 12.0    | 7.00    |
| Eu        | 2.09               | 1.81   | 1.67         | 1.76    | 1.84    | 1.89    | 1.86    | 1.85    | 2.87    | 3.40    | 3.43    | 3.68    | 3.38    | 3.47    | 2.21    |
| Gd        | 5.81               | 5.06   | 4.96         | 5.90    | 5.84    | 6.18    | 6.04    | 5.87    | 8.19    | 9.72    | 9.91    | 9.82    | 9.93    | 9.95    | 7.69    |
| Tb        | 0.87               | 0.82   | 0.72         | 0.85    | 0.87    | 0.90    | 0.86    | 0.84    | 1.03    | 1.36    | 1.39    | 1.43    | 1.42    | 1.43    | 1.20    |
| Dy        | 4.58               | 4.36   | 4.07         | 5.06    | 5.02    | 5.14    | 5.02    | 5.19    | 5.17    | 6.54    | 6.51    | 6.74    | 6.51    | 6.91    | 7.19    |
| Ho        | 0.92               | 0.82   | 0.77         | 0.94    | 0.94    | 0.98    | 0.96    | 0.94    | 0.87    | 1.18    | 1.15    | 1.21    | 1.16    | 1.24    | 1.40    |
| Er        | 2.37               | 2.27   | 1.89         | 2.47    | 2.45    | 2.62    | 2.54    | 2.47    | 2.36    | 2.89    | 2.89    | 3.00    | 2.96    | 3.04    | 4.25    |
| Tm        | 0.32               | 0.29   | 0.24         | 0.37    | 0.36    | 0.39    | 0.36    | 0.36    | 0.32    | 0.39    | 0.41    | 0.41    | 0.40    | 0.42    | 0.63    |
| Yb        | 2.10               | 1.78   | 1.57         | 2.09    | 2.11    | 2.30    | 2.22    | 2.07    | 1.83    | 2.24    | 2.27    | 2.35    | 2.32    | 2.38    | 3.94    |
| Lu        | 0.31               | 0.25   | 0.23         | 0.33    | 0.32    | 0.34    | 0.32    | 0.32    | 0.25    | 0.34    | 0.34    | 0.35    | 0.36    | 0.36    | 0.58    |
| Hf        | 4.48               | 4.30   | 3.96         | 4.48    | 4.55    | 4.60    | 4.74    | 4.74    | 7.03    | 9.51    | 9.70    | 10.0    | 9.60    | 9.59    | 4.81    |
| Ta        | 1.59               | 0.93   | 1.06         | 0.76    | 0.78    | 0.81    | 0.80    | 0.82    | 2.53    | 2.53    | 2.59    | 2.68    | 2.56    | 2.57    | 2.43    |

Table S3: Continued

| Location                            |                    |        | Xichang dike |          |         |          |         |          |          |          |          |         |         |         |          |
|-------------------------------------|--------------------|--------|--------------|----------|---------|----------|---------|----------|----------|----------|----------|---------|---------|---------|----------|
| Sample                              | DT1405             | DT1406 | DT1407       | XC05-18  | XC05-19 | XC05-20  | XC05-21 | XC05-22  | XC01-01  | XC01-02  | XC01-03  | XC01-04 | XC01-05 | XC01-06 | XC02-07  |
| Rock type                           | Alkaine mafic rock |        |              |          |         |          |         |          |          |          |          |         |         |         |          |
| Reference                           | Li et al., 2019    |        |              |          |         |          |         |          |          |          |          |         |         |         |          |
| Age(Ma)                             | 760                |        |              |          |         |          |         |          | 751      |          |          |         |         |         |          |
| Pb                                  | 5.32               | 2.81   | 8.97         | 6.63     | 3.87    | 4.99     | 6.22    | 5.11     | 7.39     | 8.87     | 7.78     | 17.0    | 5.49    | 7.84    | 4.86     |
| Th                                  | 3.92               | 2.30   | 3.25         | 2.18     | 2.32    | 2.52     | 2.42    | 2.42     | 7.13     | 8.33     | 8.41     | 8.62    | 8.30    | 8.37    | 4.41     |
| U                                   | 0.80               | 0.46   | 0.66         | 0.53     | 0.54    | 0.56     | 0.60    | 0.55     | 1.36     | 1.56     | 1.61     | 1.63    | 1.58    | 1.58    | 1.01     |
| Isotopic date                       |                    |        |              |          |         |          |         |          |          |          |          |         |         |         |          |
| $^{87}\text{Sr}/^{86}\text{Sr}$ (t) |                    |        |              | 0.703210 |         | 0.703435 |         | 0.703452 | 0.702097 | 0.701859 | 0.701487 |         |         |         | 0.706143 |
| $\epsilon_{\text{Nd}}$ (t)          |                    | 5.2    |              | 2.6      |         | 3.37     |         | 3.12     | 1.9      | 2.8      | 2.8      |         |         |         | 5.4      |
| Ratio                               |                    |        |              |          |         |          |         |          |          |          |          |         |         |         |          |
| Mg#                                 | 56.5               | 57.6   | 65.0         | 59.1     | 58.7    | 58.2     | 57.7    | 58.6     | 60.0     | 60.0     | 60.0     | 59.2    | 60.4    | 59.6    | 41.3     |
| Sr/Y                                | 23.5               | 23.2   | 19.6         | 24.6     | 21.9    | 21.0     | 22.0    | 22.5     | 14.8     | 12.0     | 12.6     | 12.5    | 12.2    | 11.9    | 9.19     |
| Nb/La                               | 0.85               | 0.70   | 0.74         | 0.60     | 0.57    | 0.62     | 0.57    | 0.60     | 0.94     | 0.66     | 0.70     | 0.67    | 0.68    | 0.68    | 1.04     |
| Nb/U                                | 34.5               | 33.5   | 27.0         | 22.6     | 22.2    | 23.2     | 20.0    | 21.8     | 34.6     | 23.7     | 24.2     | 23.9    | 24.1    | 24.1    | 28.7     |

[illegible]

Table S3: Continued

| Location  |                    |         |         | Tongde dike |           |           |           |           |         |         |         |         |         |         |        |        |
|-----------|--------------------|---------|---------|-------------|-----------|-----------|-----------|-----------|---------|---------|---------|---------|---------|---------|--------|--------|
| Sample    | XC02-08            | XC02-09 | XC02-10 | TBZ1-0701   | TBZ1-0702 | TBZ1-0703 | TBZ1-0704 | TBZ1-0705 | TBZ0600 | TBZ0601 | TBZ0602 | TBZ0603 | TBZ0604 | TBZ0605 | SC02-1 | SC02-2 |
| Rock type | Alkaine mafic rock |         |         |             |           |           |           |           |         |         |         |         |         |         |        |        |
| Reference | Li et al., 2010    |         |         |             |           |           |           |           |         |         |         |         |         |         |        |        |
| Age(Ma)   | 743                |         |         | 796         |           |           |           |           |         |         |         |         |         |         | 848    |        |
| Ga        |                    |         |         | 12.8        | 13.7      | 13.1      | 13.5      | 11.5      | 18.4    | 12.7    | 12.4    | 13.4    | 13.9    | 12.8    | 27.6   | 22.7   |
| Ge        |                    |         |         |             |           |           |           |           |         |         |         |         |         |         |        |        |
| Rb        | 14.0               | 6.00    | 15.0    | 5.73        | 5.48      | 5.72      | 6.21      | 5.26      | 7.48    | 6.21    | 7.05    | 6.78    | 7.13    | 6.65    | 22.1   | 18.5   |
| Sr        | 426                | 331     | 295     | 252         | 259       | 255       | 263       | 229       | 377     | 218     | 212     | 235     | 241     | 241     | 654    | 582    |
| Y         | 39.0               | 35.0    | 43.0    | 14.9        | 15.3      | 15.4      | 15.2      | 12.9      | 20.8    | 15.1    | 14.6    | 15.4    | 16.0    | 15.4    | 30.0   | 28.7   |
| Zr        | 189                | 182     | 184     | 110         | 110       | 114       | 118       | 100       | 156     | 124     | 119     | 130     | 133     | 128     | 125    | 114    |
| Nb        | 26.0               | 25.0    | 26.0    | 12.5        | 12.5      | 13.0      | 13.5      | 11.5      | 18.4    | 13.8    | 13.3    | 14.5    | 15.1    | 14.5    | 3.34   | 4.11   |
| Sn        |                    |         |         |             |           |           |           |           |         |         |         |         |         |         | 0.82   | 1.14   |
| Cs        |                    |         |         | 0.62        | 0.75      | 0.65      | 0.73      | 0.64      | 1.17    | 1.00    | 1.12    | 0.72    | 0.72    | 0.68    | 1.61   | 1.11   |
| Ba        | 942                | 722     | 438     | 94.3        | 83.7      | 88.5      | 91.3      | 93.4      | 123     | 71.8    | 80.2    | 81.4    | 83.5    | 89.3    | 324    | 379    |
| La        | 33.0               | 30.0    | 37.0    | 13.2        | 13.5      | 13.5      | 13.5      | 11.5      | 18.0    | 12.5    | 12.3    | 13.2    | 13.6    | 13.1    | 26.1   | 20.5   |
| Ce        | 62.0               | 61.0    | 63.0    | 29.3        | 29.9      | 29.9      | 30.2      | 25.6      | 39.9    | 27.3    | 27.2    | 29.2    | 29.7    | 29.6    | 57.8   | 44.9   |
| Pr        | 9.00               | 8.00    | 10.0    | 4.03        | 4.10      | 4.10      | 4.12      | 3.53      | 5.47    | 3.79    | 3.74    | 4.06    | 4.10    | 3.99    | 7.44   | 5.68   |
| Nd        | 38.0               | 35.0    | 43.0    | 17.6        | 18.1      | 18.1      | 18.3      | 15.9      | 24.5    | 16.8    | 16.4    | 17.7    | 18.1    | 18.0    | 30.9   | 23.8   |
| Sm        | 8.00               | 7.00    | 9.00    | 3.99        | 4.25      | 4.20      | 4.23      | 3.68      | 5.64    | 3.99    | 3.89    | 4.40    | 4.49    | 4.29    | 6.35   | 5.49   |
| Eu        | 2.49               | 2.31    | 2.73    | 1.31        | 1.36      | 1.37      | 1.39      | 1.20      | 1.94    | 1.42    | 1.35    | 1.49    | 1.57    | 1.47    | 2.01   | 1.80   |
| Gd        | 7.82               | 7.03    | 9.08    | 3.84        | 4.10      | 3.97      | 4.09      | 3.54      | 5.44    | 3.50    | 3.55    | 3.70    | 3.94    | 3.76    | 5.64   | 5.49   |
| Tb        | 1.39               | 1.25    | 1.54    | 0.61        | 0.61      | 0.62      | 0.62      | 0.55      | 0.85    | 0.57    | 0.57    | 0.62    | 0.63    | 0.62    | 0.84   | 0.86   |
| Dy        | 7.63               | 6.89    | 8.62    | 3.12        | 3.31      | 3.28      | 3.34      | 2.79      | 4.61    | 3.32    | 3.29    | 3.57    | 3.67    | 3.54    | 4.60   | 5.08   |
| Ho        | 1.55               | 1.43    | 1.75    | 0.62        | 0.64      | 0.66      | 0.66      | 0.57      | 0.93    | 0.61    | 0.61    | 0.64    | 0.67    | 0.65    | 0.96   | 1.01   |
| Er        | 4.43               | 3.95    | 4.89    | 1.56        | 1.57      | 1.59      | 1.54      | 1.35      | 2.12    | 1.48    | 1.49    | 1.61    | 1.68    | 1.63    | 2.95   | 2.99   |
| Tm        | 0.66               | 0.61    | 0.73    | 0.18        | 0.19      | 0.20      | 0.20      | 0.16      | 0.27    | 0.20    | 0.21    | 0.22    | 0.22    | 0.23    | 0.41   | 0.38   |
| Yb        | 4.00               | 3.66    | 4.35    | 1.14        | 1.18      | 1.25      | 1.16      | 1.03      | 1.60    | 1.19    | 1.13    | 1.24    | 1.24    | 1.26    | 2.99   | 2.73   |
| Lu        | 0.64               | 0.57    | 0.69    | 0.16        | 0.17      | 0.16      | 0.15      | 0.15      | 0.23    | 0.15    | 0.15    | 0.16    | 0.17    | 0.16    | 0.45   | 0.39   |
| Hf        | 5.38               | 5.27    | 5.47    | 2.70        | 2.77      | 2.92      | 3.10      | 2.64      | 4.17    | 3.29    | 3.14    | 3.47    | 3.58    | 3.46    | 4.61   | 3.00   |
| Ta        | 1.69               | 1.66    | 1.72    | 0.80        | 0.79      | 0.83      | 0.90      | 0.76      | 1.25    | 0.87    | 0.83    | 0.94    | 0.92    | 0.94    | 0.15   | 0.25   |

Table S3: Continued

| Location                            |                    |          | Tongde dike |           |           |           |           |           |         |         |         |         |         |         |        |        |
|-------------------------------------|--------------------|----------|-------------|-----------|-----------|-----------|-----------|-----------|---------|---------|---------|---------|---------|---------|--------|--------|
| Sample                              | XC02-08            | XC02-09  | XC02-10     | TBZ1-0701 | TBZ1-0702 | TBZ1-0703 | TBZ1-0704 | TBZ1-0705 | TBZ0600 | TBZ0601 | TBZ0602 | TBZ0603 | TBZ0604 | TBZ0605 | SC02-1 | SC02-2 |
| Rock type                           | Alkaine mafic rock |          |             |           |           |           |           |           |         |         |         |         |         |         |        |        |
| Reference                           | Li et al., 2010    |          |             |           |           |           |           |           |         |         |         |         |         |         |        |        |
| Age(Ma)                             | 743                |          |             | 796       |           |           |           |           |         |         |         |         |         | 848     |        |        |
| Pb                                  | 6.36               | 4.61     | 4.67        | 0.67      | 1.00      | 0.70      | 2.61      | 0.78      | 1.33    | 3.00    | 1.49    | 1.45    | 1.74    | 1.78    | 5.76   | 7.21   |
| Th                                  | 4.40               | 4.32     | 4.44        | 1.41      | 1.38      | 1.43      | 1.49      | 1.30      | 1.93    | 1.36    | 1.38    | 1.48    | 1.54    | 1.48    | 3.64   | 4.36   |
| U                                   | 1.00               | 1.00     | 0.98        | 0.37      | 0.39      | 0.38      | 0.40      | 0.38      | 0.51    | 0.34    | 0.38    | 0.37    | 0.39    | 0.38    | 0.54   | 0.98   |
| Isotopic date                       |                    |          |             |           |           |           |           |           |         |         |         |         |         |         |        |        |
| $^{87}\text{Sr}/^{86}\text{Sr}$ (t) | 0.705703           | 0.705594 |             |           |           |           |           |           |         |         |         |         |         |         |        |        |
| $\epsilon_{\text{Nd}}$ (t)          | 6.2                | 6.5      |             | 8.38      | 7.79      |           |           | 8.33      | 8.20    | 8.43    | 8.64    |         | 8.67    |         |        |        |
| Ratio                               |                    |          |             |           |           |           |           |           |         |         |         |         |         |         |        |        |
| Mg#                                 | 41.1               | 42.7     | 41.2        | 78.6      | 77.9      | 78.3      | 78.2      | 80.0      | 75.4    | 78.7    | 79.2    | 78.1    | 78.1    | 78.5    | 42.4   | 52.7   |
| Sr/Y                                | 10.9               | 9.46     | 6.86        | 16.9      | 16.9      | 16.6      | 17.3      | 17.8      | 18.1    | 14.4    | 14.5    | 15.3    | 15.1    | 15.6    | 21.8   | 20.3   |
| Nb/La                               | 0.79               | 0.83     | 0.70        | 0.95      | 0.93      | 0.96      | 1.00      | 1.00      | 1.02    | 1.10    | 1.08    | 1.10    | 1.11    | 1.11    | 0.13   | 0.20   |
| Nb/U                                | 26.0               | 25.0     | 26.5        | 34.0      | 32.0      | 34.7      | 33.8      | 30.1      | 35.8    | 40.6    | 35.3    | 39.7    | 38.6    | 38.6    | 6.19   | 4.19   |

Table S3: Continued

| Location                       | Baoxing intrusion       |        |        |        |        |        |        |        |                         |         |         |         |         |         |         |         |
|--------------------------------|-------------------------|--------|--------|--------|--------|--------|--------|--------|-------------------------|---------|---------|---------|---------|---------|---------|---------|
| Sample                         | SC01-4                  | SC01-5 | SC01-6 | SC01-7 | SC09-1 | SC09-2 | SC09-3 | SC10-1 | CX411-1                 | CX412-1 | CX484-1 | CX484-3 | CX485-1 | CX485-2 | CX486-1 | CX486-2 |
| Rock type                      | Sub alkaline mafic rock |        |        |        |        |        |        |        | Sub alkaline mafic rock |         |         |         |         |         |         |         |
| Reference                      | Meng et al., 2015       |        |        |        |        |        |        |        | Du et al., 2014         |         |         |         |         |         |         |         |
| Age(Ma)                        | 799                     |        |        |        | 802    |        |        |        | 856                     |         |         |         |         |         |         |         |
| Major(wt.%)                    |                         |        |        |        |        |        |        |        |                         |         |         |         |         |         |         |         |
| SiO <sub>2</sub>               | 57.62                   | 54.29  | 47.67  | 55.48  | 48.59  | 53.58  | 50.85  | 49.16  | 49.87                   | 47.02   | 54.86   | 53.25   | 50.90   | 47.80   | 51.50   | 53.74   |
| TiO <sub>2</sub>               | 0.56                    | 0.78   | 0.77   | 0.62   | 0.77   | 0.92   | 1.42   | 1.63   | 0.47                    | 0.48    | 0.35    | 0.37    | 0.44    | 0.48    | 0.51    | 0.46    |
| Al <sub>2</sub> O <sub>3</sub> | 18.04                   | 16.33  | 17.74  | 18.23  | 18.26  | 17.82  | 17.09  | 16.85  | 18.89                   | 18.79   | 19.52   | 20.13   | 20.07   | 20.80   | 18.74   | 18.77   |
| Fe2O3T                         | 6.70                    | 8.61   | 10.12  | 7.28   | 9.82   | 8.66   | 10.85  | 11.88  | 10.29                   | 9.26    | 6.80    | 7.39    | 9.04    | 9.73    | 8.67    | 8.08    |
| Fe <sub>2</sub> O <sub>3</sub> | 3.70                    | 2.69   | 3.80   | 3.55   | 3.58   | 3.63   | 3.78   | 3.80   |                         |         |         |         |         |         |         |         |
| FeO                            | 2.70                    | 5.33   | 5.69   | 3.36   | 5.62   | 4.53   | 6.36   | 7.27   |                         |         |         |         |         |         |         |         |
| MnO                            | 0.19                    | 0.31   | 0.29   | 0.24   | 0.29   | 0.22   | 0.17   | 0.17   | 0.18                    | 0.17    | 0.19    | 0.19    | 0.17    | 0.21    | 0.17    | 0.19    |
| MgO                            | 3.00                    | 5.47   | 7.50   | 3.26   | 6.09   | 3.84   | 4.74   | 5.18   | 4.85                    | 7.50    | 2.88    | 3.07    | 3.84    | 4.20    | 3.08    | 3.73    |
| CaO                            | 6.68                    | 7.42   | 8.64   | 7.22   | 8.80   | 7.78   | 8.62   | 9.10   | 9.69                    | 11.17   | 8.80    | 8.12    | 9.93    | 9.92    | 11.88   | 9.39    |
| Na <sub>2</sub> O              | 3.56                    | 3.02   | 3.13   | 3.31   | 3.31   | 3.29   | 3.30   | 3.23   | 2.39                    | 1.85    | 3.08    | 3.30    | 2.87    | 3.31    | 2.44    | 3.19    |
| K <sub>2</sub> O               | 1.24                    | 1.11   | 0.73   | 1.59   | 0.81   | 1.40   | 1.00   | 0.94   | 0.63                    | 0.42    | 0.83    | 1.33    | 0.59    | 1.01    | 0.42    | 0.74    |
| P <sub>2</sub> O <sub>5</sub>  | 0.34                    | 0.24   | 0.20   | 0.36   | 0.21   | 0.33   | 0.27   | 0.25   | 0.09                    | 0.08    | 0.10    | 0.09    | 0.09    | 0.09    | 0.10    | 0.11    |
| LOI                            | 2.01                    | 2.15   | 3.14   | 1.99   | 2.94   | 1.77   | 1.39   | 1.24   | 2.13                    | 2.68    | 2.01    | 2.15    | 2.10    | 1.97    | 2.23    | 1.04    |
| TOL                            | 99.64                   | 99.14  | 99.30  | 99.21  | 99.27  | 99.11  | 98.99  | 98.82  | 99.48                   | 99.42   | 99.40   | 99.38   | 100.04  | 99.53   | 99.70   | 99.43   |
| Trace(ppm)                     |                         |        |        |        |        |        |        |        |                         |         |         |         |         |         |         |         |
| Li                             | 7.22                    | 8.32   | 13.6   | 6.96   | 12.5   | 7.25   | 7.77   | 7.91   |                         |         |         |         |         |         |         |         |
| Be                             | 1.64                    | 1.66   | 0.85   | 1.77   | 1.01   | 1.45   | 0.88   | 0.69   |                         |         |         |         |         |         |         |         |
| Sc                             | 14.1                    | 33.8   | 46.8   | 14.6   | 44.2   | 21.2   | 32.0   | 36.5   | 20.3                    | 24.0    | 12.7    | 15.6    | 23.3    | 23.4    | 28.4    | 26.1    |
| V                              | 118                     | 245    | 287    | 117    | 279    | 182    | 290    | 333    |                         |         |         |         |         |         |         |         |
| Cr                             | 35.8                    | 75.2   | 71.2   | 34.8   | 64.6   | 34.1   | 33.2   | 32.5   | 41.0                    | 138     | 9.93    | 5.14    | 26.5    | 15.3    | 9.61    | 7.07    |
| Co                             | 26.2                    | 36.8   | 44.7   | 37.6   | 41.1   | 22.8   | 31.2   | 35.0   | 26.9                    | 37.4    | 13.7    | 14.0    | 22.9    | 21.3    | 16.4    | 17.3    |
| Ni                             | 23.4                    | 61.1   | 68.0   | 21.1   | 38.6   | 22.6   | 25.5   | 26.0   | 14.8                    | 44.9    | 4.38    | 4.10    | 10.8    | 8.30    | 6.90    | 6.40    |
| Cu                             | 4.55                    | 4.09   | 34.5   | 2.13   | 28.4   | 11.7   | 28.0   | 33.9   |                         |         |         |         |         |         |         |         |
| Zn                             | 91.7                    | 135    | 142    | 104    | 141    | 108    | 111    | 116    |                         |         |         |         |         |         |         |         |

Table S3: Continued

| Location  | Baoxing intrusion       |        |        |        |        |        |        |        |                         |         |         |         |         |         |         |         |
|-----------|-------------------------|--------|--------|--------|--------|--------|--------|--------|-------------------------|---------|---------|---------|---------|---------|---------|---------|
| Sample    | SC01-4                  | SC01-5 | SC01-6 | SC01-7 | SC09-1 | SC09-2 | SC09-3 | SC10-1 | CX411-1                 | CX412-1 | CX484-1 | CX484-3 | CX485-1 | CX485-2 | CX486-1 | CX486-2 |
| Rock type | Sub alkaline mafic rock |        |        |        |        |        |        |        | Sub alkaline mafic rock |         |         |         |         |         |         |         |
| Reference | Meng et al., 2015       |        |        |        |        |        |        |        | Du et al., 2014         |         |         |         |         |         |         |         |
| Age(Ma)   | 799                     |        |        |        | 802    |        |        |        | 856                     |         |         |         |         |         |         |         |
| Ga        | 22.8                    | 22.4   | 18.2   | 24.8   | 19.0   | 24.5   | 23.5   | 23.7   | 16.9                    | 16.4    | 15.5    | 16.3    | 17.3    | 16.9    | 15.7    | 14.7    |
| Ge        |                         |        |        |        |        |        |        |        |                         |         |         |         |         |         |         |         |
| Rb        | 46.2                    | 45.4   | 31.8   | 57.2   | 34.5   | 46.1   | 25.5   | 20.3   | 11.5                    | 7.66    | 24.8    | 43.1    | 15.3    | 21.7    | 6.52    | 8.88    |
| Sr        | 822                     | 579    | 585    | 781    | 584    | 720    | 628    | 579    | 482                     | 518     | 618     | 596     | 570     | 620     | 897     | 572     |
| Y         | 26.8                    | 35.4   | 20.2   | 34.4   | 23.2   | 30.6   | 22.6   | 21.6   | 12.5                    | 12.9    | 14.8    | 14.8    | 13.5    | 15.0    | 19.7    | 15.6    |
| Zr        | 116                     | 89.7   | 65.1   | 143    | 70.0   | 121    | 79.7   | 70.6   | 32.0                    | 22.0    | 28.7    | 28.0    | 27.8    | 22.4    | 36.4    | 20.1    |
| Nb        | 5.38                    | 6.06   | 1.84   | 5.10   | 2.68   | 4.29   | 3.00   | 2.41   | 1.44                    | 1.40    | 0.99    | 1.00    | 0.99    | 1.10    | 1.25    | 0.93    |
| Sn        | 1.03                    | 1.36   | 0.87   | 1.03   | 0.97   | 1.12   | 1.27   | 1.33   |                         |         |         |         |         |         |         |         |
| Cs        | 1.49                    | 1.81   | 0.34   | 1.28   | 0.63   | 1.12   | 0.88   | 0.73   | 0.85                    | 0.36    | 1.32    | 1.45    | 1.12    | 3.07    | 0.24    | 0.38    |
| Ba        | 705                     | 427    | 280    | 726    | 309    | 588    | 354    | 266    | 365                     | 156     | 391     | 430     | 453     | 515     | 243     | 448     |
| La        | 22.6                    | 21.5   | 9.94   | 29.6   | 12.3   | 24.4   | 15.6   | 12.4   | 2.74                    | 2.45    | 3.19    | 3.20    | 3.23    | 2.43    | 3.23    | 2.78    |
| Ce        | 60.7                    | 56.7   | 22.3   | 66.9   | 29.2   | 54.9   | 33.7   | 27.0   | 6.31                    | 6.20    | 7.66    | 6.75    | 7.35    | 6.03    | 8.42    | 6.83    |
| Pr        | 7.38                    | 8.04   | 3.02   | 8.56   | 4.02   | 7.05   | 4.31   | 3.54   | 0.93                    | 1.01    | 1.15    | 0.98    | 0.97    | 0.94    | 1.32    | 1.10    |
| Nd        | 29.5                    | 35.2   | 13.3   | 36.8   | 17.7   | 30.7   | 19.1   | 16.5   | 5.36                    | 5.75    | 5.64    | 5.09    | 4.99    | 4.93    | 6.99    | 5.80    |
| Sm        | 5.92                    | 7.50   | 3.34   | 7.58   | 4.17   | 6.56   | 4.53   | 4.18   | 1.42                    | 1.80    | 1.53    | 1.49    | 1.55    | 1.60    | 2.07    | 1.65    |
| Eu        | 1.75                    | 2.12   | 1.26   | 2.07   | 1.43   | 1.91   | 1.58   | 1.54   | 0.80                    | 0.71    | 0.51    | 0.50    | 0.61    | 0.51    | 0.69    | 0.52    |
| Gd        | 5.12                    | 6.58   | 3.61   | 6.61   | 4.20   | 5.94   | 4.51   | 4.36   | 1.88                    | 2.18    | 1.89    | 1.88    | 2.17    | 2.10    | 2.34    | 1.93    |
| Tb        | 0.77                    | 0.98   | 0.55   | 0.99   | 0.64   | 0.89   | 0.68   | 0.66   | 0.34                    | 0.38    | 0.31    | 0.31    | 0.35    | 0.33    | 0.39    | 0.33    |
| Dy        | 4.35                    | 5.59   | 3.43   | 5.67   | 3.86   | 5.11   | 3.90   | 3.79   | 2.30                    | 2.30    | 2.25    | 2.16    | 2.26    | 2.31    | 2.81    | 2.31    |
| Ho        | 0.89                    | 1.16   | 0.71   | 1.12   | 0.80   | 1.01   | 0.78   | 0.75   | 0.53                    | 0.54    | 0.48    | 0.46    | 0.51    | 0.50    | 0.61    | 0.49    |
| Er        | 2.80                    | 3.70   | 2.16   | 3.47   | 2.47   | 3.10   | 2.34   | 2.23   | 1.57                    | 1.51    | 1.44    | 1.44    | 1.53    | 1.52    | 1.81    | 1.46    |
| Tm        | 0.38                    | 0.52   | 0.29   | 0.47   | 0.34   | 0.41   | 0.30   | 0.28   | 0.22                    | 0.23    | 0.23    | 0.21    | 0.23    | 0.23    | 0.27    | 0.22    |
| Yb        | 2.65                    | 3.79   | 1.95   | 3.42   | 2.32   | 2.94   | 1.99   | 1.83   | 1.65                    | 1.45    | 1.70    | 1.46    | 1.51    | 1.59    | 1.89    | 1.56    |
| Lu        | 0.41                    | 0.57   | 0.29   | 0.53   | 0.35   | 0.45   | 0.30   | 0.27   | 0.23                    | 0.24    | 0.27    | 0.22    | 0.24    | 0.24    | 0.30    | 0.26    |
| Hf        | 2.91                    | 2.62   | 1.74   | 3.67   | 1.92   | 3.18   | 2.21   | 2.03   | 1.00                    | 0.74    | 1.02    | 0.92    | 0.95    | 0.80    | 1.24    | 0.84    |
| Ta        | 0.26                    | 0.23   | 0.13   | 0.29   | 0.15   | 0.26   | 0.21   | 0.20   | 0.08                    | 0.06    | 0.10    | 0.10    | 0.13    | 0.11    | 0.10    | 0.08    |



Table S3: Continued

| Location                               |                         | Baoxing intrusion |        |        |        |        |        |        |                         |          |         |         |         |         |         |         |  |
|----------------------------------------|-------------------------|-------------------|--------|--------|--------|--------|--------|--------|-------------------------|----------|---------|---------|---------|---------|---------|---------|--|
| Sample                                 | SC01-4                  | SC01-5            | SC01-6 | SC01-7 | SC09-1 | SC09-2 | SC09-3 | SC10-1 | CX411-1                 | CX412-1  | CX484-1 | CX484-3 | CX485-1 | CX485-2 | CX486-1 | CX486-2 |  |
| Rock type                              | Sub alkaline mafic rock |                   |        |        |        |        |        |        | Sub alkaline mafic rock |          |         |         |         |         |         |         |  |
| Reference                              | Meng et al., 2015       |                   |        |        |        |        |        |        | Du et al., 2014         |          |         |         |         |         |         |         |  |
| Age(Ma)                                | 799                     |                   |        |        | 802    |        |        |        | 856                     |          |         |         |         |         |         |         |  |
| Pb                                     | 5.34                    | 3.03              | 3.26   | 4.26   | 3.21   | 5.17   | 6.90   | 7.29   | 2.13                    | 1.70     | 3.42    | 3.78    | 2.72    | 2.17    | 3.95    | 2.86    |  |
| Th                                     | 3.28                    | 3.82              | 2.73   | 3.76   | 2.75   | 3.80   | 3.76   | 3.88   | 0.29                    | 0.17     | 0.34    | 0.28    | 0.44    | 0.32    | 0.32    | 0.24    |  |
| U                                      | 0.53                    | 0.59              | 0.63   | 0.68   | 0.62   | 0.73   | 0.78   | 0.84   | 0.12                    | 0.06     | 0.12    | 0.10    | 0.13    | 0.10    | 0.11    | 0.07    |  |
| Isotopic date                          |                         |                   |        |        |        |        |        |        |                         |          |         |         |         |         |         |         |  |
| <sup>87</sup> Sr/ <sup>86</sup> Sr (t) |                         |                   |        |        |        |        |        |        | 0.703288                | 0.703237 |         |         |         |         |         |         |  |
| εNd (t)                                |                         |                   |        |        |        |        |        |        | 4.8                     | 4.8      |         |         |         |         |         |         |  |
| Ratio                                  |                         |                   |        |        |        |        |        |        |                         |          |         |         |         |         |         |         |  |
| Mg#                                    | 51.1                    | 59.7              | 63.3   | 51.1   | 59.1   | 50.8   | 50.5   | 50.4   | 52.3                    | 65.4     | 49.7    | 49.2    | 49.7    | 50.1    | 45.3    | 51.8    |  |
| Sr/Y                                   | 30.7                    | 16.4              | 29.0   | 22.7   | 25.1   | 23.6   | 27.7   | 26.8   | 38.5                    | 40.2     | 41.8    | 40.4    | 42.2    | 41.4    | 45.6    | 36.7    |  |
| Nb/La                                  | 0.24                    | 0.28              | 0.19   | 0.17   | 0.22   | 0.18   | 0.19   | 0.19   | 0.53                    | 0.57     | 0.31    | 0.31    | 0.31    | 0.45    | 0.39    | 0.33    |  |
| Nb/U                                   | 10.2                    | 10.3              | 2.92   | 7.50   | 4.32   | 5.88   | 3.85   | 2.87   | 12.0                    | 23.3     | 8.25    | 10.0    | 7.62    | 11.0    | 11.4    | 13.3    |  |

Table S3: Continued

| Location                       | Guandaoshan intrusion |         |                         |       |       |       |       |       |       |       | Ganyuhe intrusion       |         |         |         |         |
|--------------------------------|-----------------------|---------|-------------------------|-------|-------|-------|-------|-------|-------|-------|-------------------------|---------|---------|---------|---------|
| Sample                         | CX486-3               | CX486-4 | GDS-1                   | GDS-2 | GDS-3 | GDS-4 | GDS-5 | GDS-6 | GDS-7 | GDS-8 | GYH-1-1                 | GYH-1-2 | GYH-1-3 | GYH-1-5 | GYH-1-6 |
| Rock type                      |                       |         | Sub alkaline mafic rock |       |       |       |       |       |       |       | Sub alkaline mafic rock |         |         |         |         |
| Reference                      |                       |         | Zhu et al., 2021        |       |       |       |       |       |       |       | Zhu et al.,2021         |         |         |         |         |
| Age(Ma)                        | 856                   |         | 856.4±2.8               |       |       |       |       |       |       |       | 857.4±2.0               |         |         |         |         |
| Major(wt.%)                    |                       |         |                         |       |       |       |       |       |       |       |                         |         |         |         |         |
| SiO <sub>2</sub>               | 51.94                 | 50.42   | 52.19                   | 53.20 | 52.36 | 53.21 | 52.50 | 53.27 | 52.00 | 52.35 | 45.98                   | 46.04   | 45.81   | 45.91   | 45.53   |
| TiO <sub>2</sub>               | 0.71                  | 0.45    | 0.41                    | 0.41  | 0.46  | 0.43  | 0.43  | 0.42  | 0.48  | 0.48  | 1.34                    | 1.35    | 1.37    | 1.37    | 1.36    |
| Al <sub>2</sub> O <sub>3</sub> | 15.36                 | 18.24   | 18.65                   | 19.11 | 18.52 | 19.06 | 18.29 | 19.14 | 18.87 | 19.17 | 14.49                   | 14.56   | 14.91   | 15.02   | 14.82   |
| Fe2O3T                         | 12.22                 | 8.30    | 7.84                    | 7.83  | 8.45  | 8.20  | 8.31  | 7.56  | 8.30  | 8.32  | 12.99                   | 13.04   | 13.22   | 13.07   | 13.24   |
| Fe <sub>2</sub> O <sub>3</sub> |                       |         |                         |       |       |       |       |       |       |       |                         |         |         |         |         |
| FeO                            |                       |         |                         |       |       |       |       |       |       |       |                         |         |         |         |         |
| MnO                            | 0.28                  | 0.17    | 0.18                    | 0.17  | 0.18  | 0.18  | 0.19  | 0.17  | 0.19  | 0.16  | 0.20                    | 0.21    | 0.19    | 0.21    | 0.20    |
| MgO                            | 5.63                  | 7.46    | 3.38                    | 3.27  | 3.50  | 3.32  | 3.48  | 3.28  | 3.66  | 3.38  | 9.17                    | 9.20    | 8.64    | 8.86    | 9.01    |
| CaO                            | 7.12                  | 9.86    | 8.54                    | 8.48  | 8.78  | 8.72  | 9.62  | 8.70  | 9.32  | 9.12  | 11.43                   | 11.47   | 11.72   | 11.57   | 11.59   |
| Na <sub>2</sub> O              | 2.88                  | 2.29    | 4.70                    | 3.79  | 3.86  | 3.39  | 3.42  | 3.50  | 3.35  | 3.11  | 2.46                    | 2.42    | 2.30    | 2.46    | 2.36    |
| K <sub>2</sub> O               | 1.37                  | 0.84    | 1.42                    | 1.54  | 1.35  | 1.50  | 1.04  | 1.26  | 1.25  | 1.38  | 0.37                    | 0.37    | 0.40    | 0.39    | 0.41    |
| P <sub>2</sub> O <sub>5</sub>  | 0.15                  | 0.08    | 0.08                    | 0.08  | 0.09  | 0.09  | 0.08  | 0.08  | 0.08  | 0.09  | 0.11                    | 0.10    | 0.19    | 0.19    | 0.18    |
| LOI                            | 1.69                  | 1.86    | 2.25                    | 2.02  | 2.08  | 1.64  | 2.51  | 2.32  | 2.23  | 2.10  | 1.04                    | 1.04    | 0.93    | 1.04    | 1.17    |
| TOL                            | 99.34                 | 99.97   | 99.64                   | 99.90 | 99.63 | 99.74 | 99.87 | 99.70 | 99.73 | 99.66 | 99.58                   | 99.80   | 99.68   | 100.09  | 99.87   |
| Trace(ppm)                     |                       |         |                         |       |       |       |       |       |       |       |                         |         |         |         |         |
| Li                             |                       |         | 7.38                    | 5.90  | 7.25  | 11.5  | 9.51  | 9.38  | 8.48  | 7.83  | 4.31                    | 4.55    | 4.35    | 4.68    | 4.77    |
| Be                             |                       |         | 0.40                    | 0.38  | 0.37  | 0.37  | 0.38  | 0.37  | 0.39  | 0.40  | 0.45                    | 0.45    | 0.47    | 0.47    | 0.47    |
| Sc                             | 38.3                  | 33.8    | 23.8                    | 22.5  | 25.3  | 24.0  | 23.8  | 23.4  | 26.3  | 24.2  | 45.8                    | 45.2    | 46.1    | 42.4    | 44.7    |
| V                              |                       |         | 218                     | 209   | 239   | 223   | 224   | 223   | 228   | 226   | 323                     | 325     | 330     | 323     | 325     |
| Cr                             | 16.7                  | 248     | 14.8                    | 10.7  | 12.6  | 11.2  | 13.6  | 13.4  | 11.1  | 13.4  | 215                     | 217     | 234     | 181     | 204     |
| Co                             | 25.6                  | 36.5    | 43.1                    | 57.4  | 46.2  | 57.0  | 51.3  | 51.0  | 46.0  | 72.5  | 83.5                    | 82.9    | 83.8    | 80.9    | 81.3    |
| Ni                             | 9.17                  | 62.1    | 8.06                    | 6.77  | 7.79  | 7.26  | 7.36  | 7.36  | 7.21  | 6.63  | 80.9                    | 80.8    | 88.7    | 86.1    | 87.8    |
| Cu                             |                       |         | 24.1                    | 20.8  | 21.5  | 20.4  | 22.7  | 22.5  | 27.5  | 20.6  | 41.0                    | 41.3    | 50.5    | 54.7    | 80.7    |
| Zn                             |                       |         | 60.4                    | 57.2  | 63.0  | 58.2  | 60.6  | 60.1  | 62.5  | 60.4  | 74.7                    | 74.8    | 72.9    | 77.4    | 79.7    |

Table S3: Continued

| Location  | Guandaoshan intrusion   |         |           |       |       |       |       |       |       |       | Ganyuhe intrusion       |         |         |         |         |
|-----------|-------------------------|---------|-----------|-------|-------|-------|-------|-------|-------|-------|-------------------------|---------|---------|---------|---------|
| Sample    | CX486-3                 | CX486-4 | GDS-1     | GDS-2 | GDS-3 | GDS-4 | GDS-5 | GDS-6 | GDS-7 | GDS-8 | GYH-1-1                 | GYH-1-2 | GYH-1-3 | GYH-1-5 | GYH-1-6 |
| Rock type | Sub alkaline mafic rock |         |           |       |       |       |       |       |       |       | Sub alkaline mafic rock |         |         |         |         |
| Reference | Zhu et al., 2021        |         |           |       |       |       |       |       |       |       | Zhu et al.,2021         |         |         |         |         |
| Age(Ma)   | 856                     |         | 856.4±2.8 |       |       |       |       |       |       |       | 857.4±2.0               |         |         |         |         |
| Ga        | 14.0                    | 15.7    | 14.7      | 14.4  | 14.6  | 14.4  | 14.2  | 14.2  | 14.9  | 14.9  | 17.3                    | 17.3    | 18.1    | 17.5    | 18.0    |
| Ge        |                         |         | 1.26      | 1.24  | 1.33  | 1.28  | 1.35  | 1.33  | 1.31  | 1.39  | 1.59                    | 1.57    | 1.77    | 1.64    | 1.65    |
| Rb        | 24.0                    | 22.6    | 21.5      | 24.0  | 20.3  | 23.1  | 16.4  | 16.1  | 19.3  | 20.1  | 3.36                    | 3.15    | 4.18    | 3.44    | 4.04    |
| Sr        | 341                     | 481     | 532       | 493   | 529   | 507   | 585   | 581   | 557   | 540   | 192                     | 192     | 239     | 252     | 253     |
| Y         | 24.3                    | 12.2    | 12.8      | 12.3  | 13.6  | 12.8  | 13.0  | 12.9  | 15.7  | 13.2  | 23.8                    | 23.8    | 24.2    | 25.5    | 25.1    |
| Zr        | 32.5                    | 27.8    | 25.8      | 42.4  | 28.1  | 20.5  | 35.2  | 35.1  | 29.0  | 22.5  | 64.1                    | 62.8    | 60.7    | 61.6    | 58.6    |
| Nb        | 1.48                    | 1.13    | 0.95      | 1.03  | 1.13  | 1.06  | 0.97  | 0.96  | 1.34  | 1.49  | 1.63                    | 1.61    | 1.69    | 1.74    | 1.71    |
| Sn        |                         |         |           |       |       |       |       |       |       |       |                         |         |         |         |         |
| Cs        | 0.74                    | 1.07    | 0.51      | 0.54  | 0.51  | 0.55  | 0.43  | 0.43  | 0.48  | 0.50  | 0.10                    | 0.10    | 0.18    | 0.11    | 0.16    |
| Ba        | 479                     | 434     | 644       | 682   | 661   | 654   | 484   | 480   | 584   | 644   | 84.5                    | 84.1    | 81.3    | 118     | 82.6    |
| La        | 4.01                    | 3.66    | 3.10      | 2.99  | 3.21  | 3.11  | 3.04  | 3.03  | 3.52  | 3.81  | 3.65                    | 3.63    | 4.77    | 5.10    | 4.95    |
| Ce        | 10.9                    | 8.69    | 6.98      | 6.98  | 7.52  | 7.22  | 6.79  | 6.78  | 8.75  | 9.04  | 10.5                    | 10.4    | 13.2    | 14.3    | 13.9    |
| Pr        | 1.69                    | 1.21    | 1.00      | 0.99  | 1.09  | 1.04  | 0.98  | 0.99  | 1.26  | 1.28  | 1.73                    | 1.74    | 2.08    | 2.28    | 2.23    |
| Nd        | 8.84                    | 5.44    | 5.00      | 5.00  | 5.50  | 5.21  | 4.98  | 4.99  | 6.21  | 6.28  | 9.46                    | 9.40    | 10.7    | 11.9    | 11.7    |
| Sm        | 2.72                    | 1.55    | 1.49      | 1.45  | 1.59  | 1.52  | 1.50  | 1.50  | 1.76  | 1.66  | 3.05                    | 3.06    | 3.19    | 3.56    | 3.57    |
| Eu        | 0.75                    | 0.53    | 0.62      | 0.61  | 0.65  | 0.63  | 0.60  | 0.60  | 0.72  | 0.68  | 1.13                    | 1.12    | 1.18    | 1.23    | 1.26    |
| Gd        | 3.29                    | 1.98    | 1.71      | 1.66  | 1.87  | 1.76  | 1.74  | 1.73  | 2.06  | 1.89  | 3.71                    | 3.71    | 3.79    | 4.15    | 4.14    |
| Tb        | 0.54                    | 0.30    | 0.30      | 0.29  | 0.33  | 0.31  | 0.31  | 0.31  | 0.37  | 0.33  | 0.65                    | 0.65    | 0.66    | 0.71    | 0.71    |
| Dy        | 3.88                    | 2.09    | 2.07      | 2.02  | 2.23  | 2.11  | 2.14  | 2.13  | 2.49  | 2.20  | 4.12                    | 4.15    | 4.18    | 4.51    | 4.43    |
| Ho        | 0.83                    | 0.44    | 0.45      | 0.43  | 0.48  | 0.45  | 0.46  | 0.46  | 0.54  | 0.49  | 0.87                    | 0.87    | 0.88    | 0.94    | 0.93    |
| Er        | 2.41                    | 1.30    | 1.38      | 1.36  | 1.51  | 1.41  | 1.44  | 1.44  | 1.68  | 1.50  | 2.48                    | 2.49    | 2.51    | 2.69    | 2.63    |
| Tm        | 0.36                    | 0.18    | 0.22      | 0.21  | 0.23  | 0.22  | 0.22  | 0.22  | 0.26  | 0.23  | 0.36                    | 0.36    | 0.36    | 0.39    | 0.38    |
| Yb        | 2.52                    | 1.25    | 1.52      | 1.49  | 1.64  | 1.52  | 1.56  | 1.56  | 1.82  | 1.61  | 2.30                    | 2.31    | 2.31    | 2.41    | 2.39    |
| Lu        | 0.40                    | 0.20    | 0.23      | 0.23  | 0.24  | 0.23  | 0.24  | 0.24  | 0.27  | 0.25  | 0.34                    | 0.34    | 0.34    | 0.36    | 0.35    |
| Hf        | 1.31                    | 0.85    | 0.83      | 1.11  | 0.88  | 0.72  | 1.03  | 1.04  | 0.91  | 0.85  | 1.83                    | 1.80    | 1.69    | 1.77    | 1.72    |
| Ta        | 0.15                    | 0.12    | 0.09      | 0.12  | 0.11  | 0.12  | 0.10  | 0.10  | 0.13  | 0.18  | 0.14                    | 0.14    | 0.13    | 0.13    | 0.13    |

Table S3: Continued

| Location                            | Guandaoshan intrusion   |         |           |       |          |          |          |       |       |       | Ganyuhe intrusion       |         |          |          |         |
|-------------------------------------|-------------------------|---------|-----------|-------|----------|----------|----------|-------|-------|-------|-------------------------|---------|----------|----------|---------|
| Sample                              | CX486-3                 | CX486-4 | GDS-1     | GDS-2 | GDS-3    | GDS-4    | GDS-5    | GDS-6 | GDS-7 | GDS-8 | GYH-1-1                 | GYH-1-2 | GYH-1-3  | GYH-1-5  | GYH-1-6 |
| Rock type                           | Sub alkaline mafic rock |         |           |       |          |          |          |       |       |       | Sub alkaline mafic rock |         |          |          |         |
| Reference                           | Zhu et al., 2021        |         |           |       |          |          |          |       |       |       | Zhu et al.,2021         |         |          |          |         |
| Age(Ma)                             | 856                     |         | 856.4±2.8 |       |          |          |          |       |       |       | 857.4±2.0               |         |          |          |         |
| Pb                                  | 2.23                    | 2.11    | 3.05      | 2.60  | 3.03     | 3.13     | 3.46     | 3.48  | 2.73  | 3.41  | 1.91                    | 1.87    | 1.26     | 1.36     | 1.32    |
| Th                                  | 0.52                    | 0.41    | 0.39      | 0.43  | 0.49     | 0.39     | 0.44     | 0.44  | 0.41  | 0.50  | 0.25                    | 0.28    | 0.16     | 0.18     | 0.19    |
| U                                   | 0.16                    | 0.13    | 0.12      | 0.14  | 0.15     | 0.13     | 0.14     | 0.14  | 0.14  | 0.17  | 0.06                    | 0.07    | 0.04     | 0.05     | 0.05    |
| Isotopic date                       |                         |         |           |       |          |          |          |       |       |       |                         |         |          |          |         |
| $^{87}\text{Sr}/^{86}\text{Sr}$ (t) |                         |         |           |       | 0.703203 | 0.703895 | 0.703864 |       |       |       |                         |         | 0.703535 | 0.703461 |         |
| $\epsilon_{\text{Nd}}$ (t)          |                         |         |           |       | 5.8      | 5.3      | 5.6      |       |       |       |                         |         | 4.9      | 5        |         |
| Ratio                               |                         |         |           |       |          |          |          |       |       |       |                         |         |          |          |         |
| Mg#                                 | 51.8                    | 67.7    | 50.1      | 49.3  | 49.1     | 48.5     | 49.4     | 50.3  | 50.7  | 48.6  | 62.2                    | 62.2    | 60.4     | 61.2     | 61.3    |
| Sr/Y                                | 14.1                    | 39.4    | 41.6      | 40.1  | 38.9     | 39.6     | 45.0     | 45.0  | 35.5  | 40.9  | 8.07                    | 8.07    | 9.88     | 9.88     | 10.1    |
| Nb/La                               | 0.37                    | 0.31    | 0.31      | 0.34  | 0.35     | 0.34     | 0.32     | 0.32  | 0.38  | 0.39  | 0.45                    | 0.44    | 0.35     | 0.34     | 0.35    |
| Nb/U                                | 9.25                    | 8.69    | 7.92      | 7.36  | 7.53     | 8.15     | 6.93     | 6.86  | 9.57  | 8.76  | 25.5                    | 24.0    | 40.2     | 35.5     | 35.6    |

Table S3: Continued

| Location                       |         | Dajianshan intrusion    |         |         |         |         |         |         | Gaojiacun intrusion     |       |       |       |       |       |       |
|--------------------------------|---------|-------------------------|---------|---------|---------|---------|---------|---------|-------------------------|-------|-------|-------|-------|-------|-------|
| Sample                         | GYH-1-7 | DJS-1-1                 | DJS-1-2 | DJS-1-3 | DJS-1-4 | DJS-1-5 | DJS-1-6 | DJS-1-7 | GJZ9                    | GJZ24 | GJZ7  | GJZ26 | GJZ31 | GJZ45 | GJZ34 |
| Rock type                      |         | Sub alkaline mafic rock |         |         |         |         |         |         | Sub alkaline mafic rock |       |       |       |       |       |       |
| Reference                      |         | Zhu et al., 2019        |         |         |         |         |         |         | Zhu et al., 2006        |       |       |       |       |       |       |
| Age(Ma)                        |         | 810.4±2.0               |         |         |         |         |         |         | 825                     |       |       |       |       |       |       |
| Major(wt.%)                    |         |                         |         |         |         |         |         |         |                         |       |       |       |       |       |       |
| SiO <sub>2</sub>               | 45.61   | 52.62                   | 53.25   | 52.72   | 53.87   | 53.55   | 52.66   | 52.74   | 40.68                   | 43.82 | 41.02 | 43.48 | 48.76 | 42.81 | 42.33 |
| TiO <sub>2</sub>               | 1.39    | 0.53                    | 0.54    | 0.51    | 0.53    | 0.56    | 0.53    | 0.54    | 0.43                    | 0.18  | 0.01  | 0.80  | 0.49  | 0.89  | 0.15  |
| Al <sub>2</sub> O <sub>3</sub> | 14.85   | 20.15                   | 20.19   | 20.10   | 20.14   | 19.98   | 20.63   | 20.21   | 23.24                   | 12.90 | 26.78 | 15.45 | 16.31 | 19.74 | 1.15  |
| Fe2O3T                         | 13.09   | 7.49                    | 7.45    | 7.45    | 7.18    | 7.26    | 7.46    | 7.45    | 4.97                    | 7.70  | 4.32  | 6.10  | 8.03  | 8.69  | 12.76 |
| Fe <sub>2</sub> O <sub>3</sub> |         |                         |         |         |         |         |         |         | 1.53                    | 2.48  | 1.10  | 0.45  | 3.59  | 1.91  | 5.32  |
| FeO                            |         |                         |         |         |         |         |         |         | 3.10                    | 4.70  | 2.90  | 5.09  | 4.00  | 6.10  | 6.70  |
| MnO                            | 0.21    | 0.13                    | 0.15    | 0.14    | 0.13    | 0.13    | 0.13    | 0.14    | 0.08                    | 0.12  | 0.05  | 0.17  | 0.20  | 0.15  | 0.20  |
| MgO                            | 8.85    | 3.04                    | 3.09    | 3.41    | 3.38    | 2.67    | 3.40    | 3.17    | 9.46                    | 13.96 | 8.21  | 8.39  | 7.65  | 8.61  | 26.77 |
| CaO                            | 11.40   | 7.50                    | 6.86    | 6.32    | 5.68    | 7.36    | 6.18    | 6.89    | 15.22                   | 13.20 | 11.57 | 16.72 | 10.98 | 11.53 | 5.58  |
| Na <sub>2</sub> O              | 2.46    | 4.85                    | 4.84    | 4.99    | 4.80    | 4.83    | 4.83    | 4.85    | 1.01                    | 1.04  | 1.75  | 2.26  | 3.07  | 2.96  | 0.68  |
| K <sub>2</sub> O               | 0.39    | 0.84                    | 1.04    | 1.21    | 1.47    | 0.92    | 1.34    | 1.06    | 0.07                    | 0.08  | 0.14  | 0.13  | 1.56  | 0.60  | 0.06  |
| P <sub>2</sub> O <sub>5</sub>  | 0.18    | 0.21                    | 0.21    | 0.23    | 0.20    | 0.21    | 0.22    | 0.21    | 0.15                    | 0.01  | 0.01  | 0.26  | 0.90  | 0.08  | 0.01  |
| LOI                            | 1.07    | 2.47                    | 2.51    | 2.69    | 2.61    | 2.39    | 2.80    | 2.54    | 0.50                    | 4.90  | 3.87  | 0.45  | 1.40  | 3.42  | 10.80 |
| TOL                            | 99.50   | 99.83                   | 100.13  | 99.77   | 99.99   | 99.86   | 100.18  | 99.80   | 99.57                   | 99.49 | 99.81 | 99.55 | 99.21 | 99.52 | 99.75 |
| Trace(ppm)                     |         |                         |         |         |         |         |         |         |                         |       |       |       |       |       |       |
| Li                             | 4.90    | 1.63                    | 4.36    | 5.69    | 5.55    | 4.84    | 6.52    | 5.51    |                         |       |       |       |       |       |       |
| Be                             | 0.49    | 1.38                    | 1.54    | 1.69    | 1.99    | 1.34    | 1.75    | 1.71    |                         |       |       |       |       |       |       |
| Sc                             | 43.8    | 15.8                    | 19.0    | 21.0    | 19.6    | 16.2    | 15.6    | 19.0    |                         |       |       |       |       |       |       |
| V                              | 326     | 124                     | 128     | 125     | 123     | 133     | 115     | 123     | 65.0                    | 115   | 6.16  | 83.8  | 181   | 406   | 117   |
| Cr                             | 186     | 22.7                    | 24.4    | 23.2    | 26.4    | 23.1    | 20.7    | 24.7    | 521                     | 1210  | 26.6  | 519   | 470   | 69.9  | 1510  |
| Co                             | 80.7    | 53.4                    | 51.4    | 45.9    | 47.9    | 60.6    | 46.9    | 50.4    |                         |       |       |       |       |       |       |
| Ni                             | 85.5    | 11.1                    | 9.78    | 9.58    | 8.86    | 11.1    | 11.1    | 9.69    | 115                     | 228   | 109   | 148   | 221   | 40.3  | 821   |
| Cu                             | 54.3    | 18.4                    | 12.8    | 13.6    | 14.0    | 34.4    | 21.6    | 17.3    | 16.2                    | 60.6  | 20.7  | 12.7  | 110   | 61.1  | 171   |
| Zn                             | 78.5    | 74.9                    | 77.9    | 83.1    | 84.3    | 67.5    | 81.6    | 81.0    |                         |       |       |       |       |       |       |

Table S3: Continued

| Location  |         | Dajianshan intrusion    |         |         |         |         |         |         | Gaojiacun intrusion     |       |       |       |       |       |       |
|-----------|---------|-------------------------|---------|---------|---------|---------|---------|---------|-------------------------|-------|-------|-------|-------|-------|-------|
| Sample    | GYH-1-7 | DJS-1-1                 | DJS-1-2 | DJS-1-3 | DJS-1-4 | DJS-1-5 | DJS-1-6 | DJS-1-7 | GJZ9                    | GJZ24 | GJZ7  | GJZ26 | GJZ31 | GJZ45 | GJZ34 |
| Rock type |         | Sub alkaline mafic rock |         |         |         |         |         |         | Sub alkaline mafic rock |       |       |       |       |       |       |
| Reference |         | Zhu et al., 2019        |         |         |         |         |         |         | Zhu et al., 2006        |       |       |       |       |       |       |
| Age(Ma)   |         | 810.4±2.0               |         |         |         |         |         |         | 825                     |       |       |       |       |       |       |
| Ga        | 17.7    | 21.0                    | 21.6    | 21.4    | 21.4    | 22.0    | 20.6    | 21.6    | 12.7                    | 8.04  | 11.9  | 12.6  | 20.9  | 16.9  | 3.61  |
| Ge        | 1.64    | 1.53                    | 1.50    | 1.41    | 1.38    | 1.51    | 1.29    | 1.41    |                         |       |       |       |       |       |       |
| Rb        | 3.58    | 13.8                    | 18.2    | 21.4    | 26.4    | 13.5    | 18.2    | 20.9    | 0.60                    | 0.30  | 1.03  | 1.12  | 5.73  | 9.00  | 0.54  |
| Sr        | 256     | 796                     | 724     | 687     | 631     | 788     | 672     | 694     | 1010                    | 426   | 968   | 118   | 643   | 842   | 41.0  |
| Y         | 26.0    | 24.1                    | 28.0    | 29.5    | 27.9    | 22.0    | 22.5    | 25.9    | 1.28                    | 3.97  | 0.64  | 17.6  | 37.8  | 14.9  | 2.93  |
| Zr        | 65.6    | 145                     | 192     | 174     | 187     | 165     | 157     | 158     | 2.93                    | 5.44  | 1.56  | 52.2  | 45.5  | 17.9  | 10.1  |
| Nb        | 1.78    | 3.99                    | 5.07    | 4.52    | 4.96    | 4.16    | 3.85    | 4.73    | 0.081                   | 0.060 | 0.050 | 4.80  | 5.18  | 1.23  | 0.26  |
| Sn        |         |                         |         |         |         |         |         |         |                         |       |       |       |       |       |       |
| Cs        | 0.12    | 0.10                    | 0.11    | 0.14    | 0.17    | 0.11    | 0.15    | 0.14    | 0.064                   | 0.041 | 0.089 | 0.092 | 2.64  | 0.58  | 0.048 |
| Ba        | 139     | 445                     | 511     | 592     | 698     | 448     | 677     | 614     | 45.2                    | 22.6  | 56.6  | 31.4  | 659   | 272   | 17.9  |
| La        | 5.18    | 18.6                    | 9.90    | 15.3    | 25.2    | 24.2    | 11.8    | 21.8    | 0.61                    | 0.64  | 0.41  | 15.2  | 34.5  | 1.65  | 1.14  |
| Ce        | 14.8    | 42.1                    | 25.3    | 35.0    | 54.5    | 51.2    | 29.0    | 47.9    | 1.39                    | 1.76  | 0.79  | 30.1  | 86.0  | 6.16  | 3.00  |
| Pr        | 2.33    | 5.38                    | 3.59    | 4.79    | 6.70    | 6.10    | 3.91    | 5.98    | 0.23                    | 0.31  | 0.096 | 3.66  | 11.2  | 1.20  | 0.48  |
| Nd        | 12.2    | 22.8                    | 17.1    | 21.8    | 27.5    | 24.3    | 17.7    | 24.9    | 1.11                    | 1.86  | 0.45  | 15.7  | 48.5  | 7.25  | 2.48  |
| Sm        | 3.65    | 4.81                    | 4.41    | 5.24    | 5.64    | 4.59    | 4.14    | 5.16    | 0.28                    | 0.63  | 0.077 | 3.57  | 11.3  | 2.48  | 0.64  |
| Eu        | 1.26    | 1.35                    | 1.30    | 1.45    | 1.50    | 1.35    | 1.28    | 1.43    | 0.26                    | 0.31  | 0.19  | 0.85  | 2.58  | 1.14  | 0.29  |
| Gd        | 4.29    | 4.54                    | 4.47    | 5.19    | 5.31    | 4.27    | 4.02    | 4.88    | 0.35                    | 0.67  | 0.055 | 3.50  | 9.69  | 2.85  | 0.79  |
| Tb        | 0.73    | 0.68                    | 0.72    | 0.81    | 0.80    | 0.62    | 0.62    | 0.73    | 0.044                   | 0.11  | 0.01  | 0.55  | 1.47  | 0.47  | 0.11  |
| Dy        | 4.58    | 4.16                    | 4.46    | 5.01    | 4.88    | 3.73    | 3.78    | 4.48    | 0.33                    | 0.61  | 0.035 | 2.82  | 7.52  | 2.80  | 0.63  |
| Ho        | 0.96    | 0.85                    | 0.93    | 1.03    | 0.99    | 0.77    | 0.79    | 0.92    | 0.052                   | 0.11  | 0.01  | 0.63  | 1.46  | 0.56  | 0.12  |
| Er        | 2.71    | 2.47                    | 2.72    | 3.00    | 2.88    | 2.23    | 2.30    | 2.68    | 0.15                    | 0.31  | 0.025 | 1.58  | 3.56  | 1.35  | 0.29  |
| Tm        | 0.39    | 0.37                    | 0.41    | 0.44    | 0.42    | 0.33    | 0.34    | 0.40    | 0.021                   | 0.038 | 0.00  | 0.25  | 0.47  | 0.17  | 0.043 |
| Yb        | 2.46    | 2.41                    | 2.72    | 2.95    | 2.77    | 2.21    | 2.29    | 2.60    | 0.15                    | 0.23  | 0.021 | 1.45  | 2.93  | 1.13  | 0.26  |
| Lu        | 0.36    | 0.37                    | 0.42    | 0.45    | 0.42    | 0.34    | 0.36    | 0.40    | 0.017                   | 0.033 | 0.00  | 0.23  | 0.42  | 0.17  | 0.032 |
| Hf        | 1.86    | 3.48                    | 4.49    | 4.17    | 4.46    | 3.82    | 3.74    | 3.76    | 0.10                    | 0.21  | 0.031 | 1.52  | 2.03  | 1.01  | 0.30  |
| Ta        | 0.13    | 0.18                    | 0.25    | 0.20    | 0.28    | 0.19    | 0.17    | 0.25    | 0.008                   | 0.007 | 0.01  | 0.27  | 0.36  | 0.10  | 0.018 |

Table S3: Continued

| Location                               |         | Dajianshan intrusion    |          |         |         |         |         |         | Gaojiacun intrusion     |          |       |       |       |       |       |
|----------------------------------------|---------|-------------------------|----------|---------|---------|---------|---------|---------|-------------------------|----------|-------|-------|-------|-------|-------|
| Sample                                 | GYH-1-7 | DJS-1-1                 | DJS-1-2  | DJS-1-3 | DJS-1-4 | DJS-1-5 | DJS-1-6 | DJS-1-7 | GJZ9                    | GJZ24    | GJZ7  | GJZ26 | GJZ31 | GJZ45 | GJZ34 |
| Rock type                              |         | Sub alkaline mafic rock |          |         |         |         |         |         | Sub alkaline mafic rock |          |       |       |       |       |       |
| Reference                              |         | Zhu et al., 2019        |          |         |         |         |         |         | Zhu et al., 2006        |          |       |       |       |       |       |
| Age(Ma)                                |         | 810.4±2.0               |          |         |         |         |         |         | 825                     |          |       |       |       |       |       |
| Pb                                     | 1.36    | 14.5                    | 13.6     | 12.4    | 10.6    | 14.6    | 11.7    | 12.4    | 21.0                    | 1.16     | 1.57  | 4.20  | 11.1  | 1.20  | 0.59  |
| Th                                     | 0.19    | 3.04                    | 1.68     | 2.40    | 4.76    | 4.02    | 2.02    | 3.87    | 0.039                   | 0.018    | 0.013 | 2.53  | 3.24  | 0.024 | 0.10  |
| U                                      | 0.05    | 0.41                    | 0.37     | 0.41    | 0.50    | 0.44    | 0.35    | 0.43    | 0.01                    | 0.03     | 0.012 | 0.81  | 3.05  | 0.031 | 0.024 |
| Isotopic date                          |         |                         |          |         |         |         |         |         |                         |          |       |       |       |       |       |
| <sup>87</sup> Sr/ <sup>86</sup> Sr (t) |         | 0.705392                | 0.705184 |         |         |         |         |         | 0.704900                | 0.704888 |       |       |       |       |       |
| ε <sub>Nd</sub> (t)                    |         | 1.5                     | 1        |         |         |         |         |         | 1.3                     | 1.6      |       |       |       |       |       |
| Ratio                                  |         |                         |          |         |         |         |         |         |                         |          |       |       |       |       |       |
| Mg#                                    | 61.2    | 48.6                    | 49.2     | 51.6    | 52.3    | 46.2    | 51.5    | 49.8    | 81.6                    | 80.9     | 81.6  | 76.2  | 68.9  | 69.8  | 83.0  |
| Sr/Y                                   | 9.85    | 33.0                    | 25.9     | 23.3    | 22.6    | 35.8    | 29.9    | 26.8    | 785                     | 107      | 1500  | 6.70  | 17.0  | 56.5  | 14.0  |
| Nb/La                                  | 0.34    | 0.21                    | 0.51     | 0.30    | 0.20    | 0.17    | 0.33    | 0.22    | 0.13                    | 0.094    | 0.12  | 0.32  | 0.15  | 0.75  | 0.22  |
| Nb/U                                   | 34.9    | 9.73                    | 13.7     | 11.0    | 9.92    | 9.45    | 11.0    | 11.0    | 5.79                    | 1.88     | 4.17  | 5.95  | 1.70  | 39.7  | 10.7  |

Table S3: Continued

| Location                       |                         |       |        |        |       |        |        |       |        |       |        |        |        |        |        |
|--------------------------------|-------------------------|-------|--------|--------|-------|--------|--------|-------|--------|-------|--------|--------|--------|--------|--------|
| Sample                         | GJD1                    | GJD7  | PZH46  | PZH47  | PZH48 | PZH49  | PZH50  | PZH51 | PZH52  | PZH53 | PZH54  | PZH55  | PZH56  | PZH57  | PZH58  |
| Rock type                      | Sub alkaline mafic rock |       |        |        |       |        |        |       |        |       |        |        |        |        |        |
| Reference                      | Zhou et al., 2006       |       |        |        |       |        |        |       |        |       |        |        |        |        |        |
| Age(Ma)                        | 806.0±4.0               |       |        |        |       |        |        |       |        |       |        |        |        |        |        |
| Major(wt.%)                    |                         |       |        |        |       |        |        |       |        |       |        |        |        |        |        |
| SiO <sub>2</sub>               | 42.05                   | 49.33 | 46.42  | 43.88  | 43.25 | 43.39  | 43.80  | 42.10 | 43.47  | 42.97 | 43.48  | 46.44  | 41.65  | 47.79  | 40.14  |
| TiO <sub>2</sub>               | 1.48                    | 1.08  | 0.59   | 1.70   | 1.45  | 1.45   | 1.80   | 1.52  | 1.49   | 1.73  | 2.46   | 1.35   | 3.07   | 0.63   | 2.87   |
| Al <sub>2</sub> O <sub>3</sub> | 20.00                   | 21.16 | 13.29  | 24.23  | 24.52 | 25.28  | 22.94  | 23.83 | 25.28  | 23.25 | 19.12  | 17.96  | 16.92  | 11.31  | 19.74  |
| Fe2O3T                         | 10.74                   | 9.38  | 8.97   | 6.83   | 6.92  | 7.29   | 7.55   | 8.65  | 6.47   | 7.89  | 9.71   | 7.97   | 12.87  | 12.23  | 14.82  |
| Fe <sub>2</sub> O <sub>3</sub> | 3.46                    | 3.94  |        |        |       |        |        |       |        |       |        |        |        |        |        |
| FeO                            | 6.55                    | 4.90  |        |        |       |        |        |       |        |       |        |        |        |        |        |
| MnO                            | 0.21                    | 0.28  | 0.14   | 0.09   | 0.09  | 0.08   | 0.09   | 0.09  | 0.07   | 0.08  | 0.12   | 0.13   | 0.14   | 0.20   | 0.13   |
| MgO                            | 8.17                    | 3.90  | 15.55  | 6.07   | 5.56  | 4.92   | 7.19   | 4.92  | 5.24   | 6.46  | 8.94   | 9.95   | 10.04  | 17.67  | 6.52   |
| CaO                            | 11.42                   | 9.03  | 14.42  | 14.75  | 15.28 | 15.33  | 14.56  | 14.65 | 15.44  | 14.67 | 13.98  | 15.79  | 12.30  | 8.15   | 13.07  |
| Na <sub>2</sub> O              | 2.94                    | 4.13  | 0.76   | 1.89   | 1.74  | 1.79   | 1.87   | 1.67  | 1.74   | 1.80  | 1.99   | 1.31   | 2.09   | 1.15   | 1.15   |
| K <sub>2</sub> O               | 0.29                    | 0.21  | 0.03   | 0.15   | 0.08  | 0.06   | 0.14   | 0.18  | 0.09   | 0.19  | 0.20   | 0.03   | 0.30   | 0.27   | 0.24   |
| P <sub>2</sub> O <sub>5</sub>  | 0.15                    | 0.42  | 0.04   | 0.05   | 0.06  | 0.05   | 0.04   | 0.05  | 0.03   | 0.03  | 0.05   | 0.03   | 0.05   | 0.11   | 0.98   |
| LOI                            | 2.10                    | 1.03  | 1.08   | 1.09   | 0.95  | 0.94   | 0.93   | 1.00  | 0.90   | 0.89  | 0.82   | 0.53   | 0.99   | 1.57   | 0.49   |
| TOL                            | 99.45                   | 99.41 | 101.28 | 100.72 | 99.91 | 100.58 | 100.92 | 98.74 | 100.23 | 99.97 | 100.85 | 100.85 | 100.42 | 101.09 | 101.03 |
| Trace(ppm)                     |                         |       |        |        |       |        |        |       |        |       |        |        |        |        |        |
| Li                             |                         |       |        |        |       |        |        |       |        |       |        |        |        |        |        |
| Be                             |                         |       |        |        |       |        |        |       |        |       |        |        |        |        |        |
| Sc                             |                         |       | 41.6   | 43.9   | 34.8  | 30.7   | 43.0   | 29.4  | 30.6   | 35.8  | 58.9   | 50.1   | 61.0   | 26.6   | 40.9   |
| V                              | 519                     | 245   | 139    | 249    | 260   | 280    | 320    | 339   | 253    | 309   | 398    | 269    | 488    | 168    | 521    |
| Cr                             | 135                     | 48.3  | 573    | 128    | 96.0  | 101    | 70.0   | 92.0  | 93.0   | 223   | 81.0   | 141    | 60.0   | 791    | 18.0   |
| Co                             |                         |       | 74.8   | 38.4   | 33.0  | 28.1   | 42.9   | 32.9  | 32.7   | 40.5  | 46.6   | 43.4   | 51.1   | 73.1   | 47.3   |
| Ni                             | 95.5                    | 8.98  | 193    | 69.4   | 47.9  | 48.8   | 63.5   | 41.3  | 40.8   | 47.4  | 49.5   | 32.2   | 54.8   | 460    | 15.8   |
| Cu                             | 109                     | 36.6  | 69.5   | 19.4   | 27.2  | 33.9   | 29.1   | 34.7  | 44.5   | 51.5  | 57.6   | 44.9   | 66.8   | 33.6   | 35.1   |
| Zn                             |                         |       | 58.2   | 47.2   | 48.2  | 46.6   | 50.6   | 61.5  | 40.6   | 46.4  | 60.3   | 47.3   | 75.9   | 101    | 101    |



Table S3: Continued

| Location  |                         |       |       |       |       |       |       |       |       |       |       |       |       |       |       |
|-----------|-------------------------|-------|-------|-------|-------|-------|-------|-------|-------|-------|-------|-------|-------|-------|-------|
| Sample    | GJD1                    | GJD7  | PZH46 | PZH47 | PZH48 | PZH49 | PZH50 | PZH51 | PZH52 | PZH53 | PZH54 | PZH55 | PZH56 | PZH57 | PZH58 |
| Rock type | Sub alkaline mafic rock |       |       |       |       |       |       |       |       |       |       |       |       |       |       |
| Reference | Zhou et al., 2006       |       |       |       |       |       |       |       |       |       |       |       |       |       |       |
| Age(Ma)   | 806.0±4.0               |       |       |       |       |       |       |       |       |       |       |       |       |       |       |
| Ga        | 19.0                    | 23.2  |       |       |       |       |       |       |       |       |       |       |       |       |       |
| Ge        |                         |       |       |       |       |       |       |       |       |       |       |       |       |       |       |
| Rb        | 1.24                    | 1.04  | 1.11  | 2.06  | 0.70  | 0.84  | 1.21  | 1.51  | 0.96  | 1.84  | 1.12  | 0.58  | 1.64  | 2.99  | 2.64  |
| Sr        | 717                     | 909   | 561   | 1060  | 1070  | 1120  | 1040  | 1070  | 1110  | 1030  | 775   | 709   | 701   | 302   | 849   |
| Y         | 17.2                    | 21.0  | 6.26  | 7.80  | 7.42  | 6.70  | 9.36  | 7.39  | 8.36  | 8.94  | 15.4  | 10.2  | 17.3  | 11.2  | 18.4  |
| Zr        | 26.3                    | 46.5  | 20.5  | 17.1  | 14.4  | 13.7  | 20.7  | 15.9  | 14.5  | 15.9  | 26.8  | 15.0  | 31.7  | 65.8  | 36.5  |
| Nb        | 1.94                    | 9.19  | 0.60  | 0.99  | 0.93  | 0.87  | 1.21  | 1.04  | 0.99  | 1.03  | 1.56  | 0.64  | 1.98  | 2.18  | 2.31  |
| Sn        |                         |       |       |       |       |       |       |       |       |       |       |       |       |       |       |
| Cs        | 0.066                   | 0.067 | 0.10  | 0.17  | 0.03  | 0.04  | 0.07  | 0.14  | 0.05  | 0.15  | 0.05  | 0.03  | 0.08  | 0.21  | 0.08  |
| Ba        | 173                     | 386   | 72.0  | 140   | 113   | 113   | 148   | 115   | 120   | 135   | 150   | 80.0  | 172   | 184   | 203   |
| La        | 3.01                    | 18.5  | 2.13  | 2.36  | 2.13  | 2.09  | 2.49  | 2.34  | 2.01  | 1.99  | 2.48  | 1.45  | 3.08  | 5.91  | 8.83  |
| Ce        | 9.75                    | 43.6  | 5.96  | 5.83  | 5.60  | 5.33  | 6.42  | 6.15  | 5.45  | 5.48  | 8.15  | 4.82  | 10.5  | 14.4  | 23.8  |
| Pr        | 1.84                    | 5.55  | 0.99  | 1.01  | 0.98  | 1.00  | 1.01  | 1.02  | 0.99  | 1.00  | 1.60  | 0.95  | 2.08  | 2.00  | 3.89  |
| Nd        | 9.75                    | 26.7  | 5.86  | 5.69  | 5.69  | 6.03  | 6.53  | 5.91  | 6.02  | 6.16  | 9.90  | 6.24  | 12.7  | 9.24  | 20.3  |
| Sm        | 3.67                    | 5.65  | 1.59  | 1.62  | 1.64  | 1.47  | 1.88  | 1.64  | 1.78  | 1.81  | 3.30  | 2.04  | 3.91  | 2.06  | 5.11  |
| Eu        | 1.57                    | 2.70  | 0.74  | 0.97  | 0.93  | 0.89  | 1.07  | 0.88  | 1.61  | 1.04  | 1.61  | 1.12  | 1.83  | 0.87  | 2.14  |
| Gd        | 3.98                    | 5.61  | 1.39  | 1.70  | 1.57  | 1.45  | 1.93  | 1.59  | 1.82  | 1.90  | 3.37  | 2.21  | 4.07  | 2.10  | 4.73  |
| Tb        | 0.63                    | 0.82  | 0.23  | 0.28  | 0.26  | 0.24  | 0.32  | 0.25  | 0.23  | 0.32  | 0.57  | 0.37  | 0.70  | 0.37  | 0.73  |
| Dy        | 3.64                    | 4.12  | 1.26  | 1.58  | 1.45  | 1.32  | 1.81  | 1.46  | 1.64  | 1.81  | 3.38  | 2.23  | 3.93  | 2.12  | 4.04  |
| Ho        | 0.73                    | 0.80  | 0.24  | 0.33  | 0.28  | 0.26  | 0.35  | 0.28  | 0.33  | 0.34  | 0.66  | 0.45  | 0.76  | 0.45  | 0.79  |
| Er        | 1.64                    | 1.91  | 0.61  | 0.79  | 0.76  | 0.68  | 0.92  | 0.74  | 0.82  | 0.88  | 1.74  | 1.12  | 1.99  | 1.30  | 2.04  |
| Tm        | 0.21                    | 0.29  | 0.08  | 0.09  | 0.11  | 0.09  | 0.12  | 0.11  | 0.10  | 0.12  | 0.19  | 0.13  | 0.24  | 0.18  | 0.24  |
| Yb        | 1.33                    | 1.68  | 0.52  | 0.57  | 0.54  | 0.52  | 0.69  | 0.57  | 0.62  | 0.65  | 1.26  | 0.84  | 1.45  | 1.22  | 1.40  |
| Lu        | 0.18                    | 0.25  | 0.07  | 0.08  | 0.07  | 0.08  | 0.17  | 0.08  | 0.08  | 0.09  | 0.17  | 0.12  | 0.21  | 0.21  | 0.21  |
| Hf        | 1.09                    | 3.13  | 0.62  | 0.52  | 0.46  | 0.42  | 0.59  | 0.48  | 0.49  | 0.52  | 0.96  | 0.60  | 1.21  | 1.82  | 1.17  |
| Ta        | 0.087                   | 0.45  | 0.04  | 0.05  | 0.04  | 0.05  | 0.06  | 0.05  | 0.05  | 0.05  | 0.09  | 0.04  | 0.11  | 0.13  | 0.13  |

Table S3: Continued

| Location                               |                         |          |          |          |       |       |       |          |          |       |       |          |       |       |       |
|----------------------------------------|-------------------------|----------|----------|----------|-------|-------|-------|----------|----------|-------|-------|----------|-------|-------|-------|
| Sample                                 | GJD1                    | GJD7     | PZH46    | PZH47    | PZH48 | PZH49 | PZH50 | PZH51    | PZH52    | PZH53 | PZH54 | PZH55    | PZH56 | PZH57 | PZH58 |
| Rock type                              | Sub alkaline mafic rock |          |          |          |       |       |       |          |          |       |       |          |       |       |       |
| Reference                              | Zhou et al., 2006       |          |          |          |       |       |       |          |          |       |       |          |       |       |       |
| Age(Ma)                                | 806.0±4.0               |          |          |          |       |       |       |          |          |       |       |          |       |       |       |
| Pb                                     | 2.57                    | 4.03     | 1.10     | 1.45     | 1.40  | 1.46  | 1.43  | 1.48     | 1.60     | 1.23  | 1.18  | 0.91     | 1.68  | 2.10  | 2.97  |
| Th                                     | 0.087                   | 0.22     | 0.07     | 0.07     | 0.03  | 0.03  | 0.05  | 0.07     | 0.03     | 0.04  | 0.04  | 0.03     | 0.06  | 0.38  | 0.14  |
| U                                      | 0.032                   | 0.098    | 0.02     | 0.02     | 0.01  | 0.01  | 0.02  | 0.02     | 0.01     | 0.01  | 0.02  | 0.01     | 0.02  | 0.10  | 0.06  |
| Isotopic date                          |                         |          |          |          |       |       |       |          |          |       |       |          |       |       |       |
| <sup>87</sup> Sr/ <sup>86</sup> Sr (t) | 0.704671                | 0.704582 | 0.704355 | 0.704775 |       |       |       | 0.704549 | 0.704698 |       |       | 0.704787 |       |       |       |
| ε <sub>Nd</sub> (t)                    | 1.8                     | 2.2      | 3.6      | 2.0      |       |       |       | 2.10     | 3.10     |       |       | 2.50     |       |       |       |
| Ratio                                  |                         |          |          |          |       |       |       |          |          |       |       |          |       |       |       |
| Mg#                                    | 63.9                    | 49.2     | 80.2     | 67.4     | 65.2  | 61.1  | 68.9  | 57.0     | 65.4     | 65.6  | 68.2  | 74.4     | 64.5  | 77.1  | 50.6  |
| Sr/Y                                   | 41.7                    | 43.3     | 89.6     | 135      | 144   | 167   | 111   | 145      | 133      | 116   | 50.4  | 69.7     | 40.5  | 27.1  | 46.1  |
| Nb/La                                  | 0.64                    | 0.50     | 0.28     | 0.42     | 0.44  | 0.42  | 0.49  | 0.44     | 0.49     | 0.52  | 0.63  | 0.44     | 0.64  | 0.37  | 0.26  |
| Nb/U                                   | 60.6                    | 93.8     | 30.0     | 49.5     | 93.0  | 87.0  | 60.5  | 52.0     | 99.0     | 103   | 78.0  | 64.0     | 99.0  | 21.8  | 38.5  |

Table S3: Continued

| Location                       | Panzhihua intrusion     |       |        |        |       |        |        |        |        |        |        |        |        |        |        |        |
|--------------------------------|-------------------------|-------|--------|--------|-------|--------|--------|--------|--------|--------|--------|--------|--------|--------|--------|--------|
| Sample                         | PZH60                   | PZH61 | PZH62  | PZH63  | PZH26 | PZH27  | PZH30  | PZH31  | PZH32  | PZH33  | PZH34  | PZH35  | PZH37  | PZH39  | PZH43  | PZH44  |
| Rock type                      | Sub alkaline mafic rock |       |        |        |       |        |        |        |        |        |        |        |        |        |        |        |
| Reference                      | Zhou et al., 2006       |       |        |        |       |        |        |        |        |        |        |        |        |        |        |        |
| Age(Ma)                        | 812                     |       |        |        |       |        |        |        |        |        |        |        |        |        |        |        |
| Major(wt.%)                    |                         |       |        |        |       |        |        |        |        |        |        |        |        |        |        |        |
| SiO <sub>2</sub>               | 45.60                   | 46.60 | 46.60  | 46.87  | 43.90 | 45.46  | 42.11  | 48.07  | 45.07  | 42.62  | 44.28  | 49.41  | 47.71  | 50.00  | 46.27  | 47.81  |
| TiO <sub>2</sub>               | 0.35                    | 0.18  | 0.39   | 1.46   | 0.40  | 0.60   | 0.41   | 0.63   | 0.55   | 0.34   | 3.03   | 0.65   | 1.06   | 1.09   | 2.10   | 1.29   |
| Al <sub>2</sub> O <sub>3</sub> | 19.56                   | 26.13 | 25.23  | 17.41  | 3.08  | 5.71   | 3.09   | 4.87   | 5.14   | 3.23   | 16.86  | 16.49  | 13.27  | 17.68  | 18.29  | 13.77  |
| Fe2O3T                         | 6.50                    | 4.37  | 4.08   | 13.38  | 13.02 | 11.36  | 13.30  | 9.88   | 12.48  | 12.89  | 12.10  | 7.37   | 10.29  | 9.60   | 10.38  | 11.43  |
| Fe <sub>2</sub> O <sub>3</sub> |                         |       |        |        |       |        |        |        |        |        |        |        |        |        |        |        |
| FeO                            |                         |       |        |        |       |        |        |        |        |        |        |        |        |        |        |        |
| MnO                            | 0.14                    | 0.06  | 0.07   | 0.21   | 0.17  | 0.17   | 0.20   | 0.17   | 0.18   | 0.17   | 0.15   | 0.14   | 0.18   | 0.17   | 0.14   | 0.19   |
| MgO                            | 10.75                   | 5.90  | 5.87   | 7.26   | 26.15 | 23.85  | 28.11  | 18.76  | 25.82  | 29.63  | 7.84   | 10.03  | 13.52  | 7.18   | 7.09   | 10.28  |
| CaO                            | 15.85                   | 12.67 | 12.67  | 11.75  | 9.42  | 11.42  | 7.48   | 15.14  | 9.43   | 7.09   | 10.49  | 12.86  | 11.37  | 9.84   | 11.29  | 12.24  |
| Na <sub>2</sub> O              | 0.86                    | 1.22  | 1.88   | 2.33   | 0.27  | 0.54   | 0.17   | 0.53   | 0.59   | 0.22   | 2.04   | 1.54   | 1.48   | 4.18   | 2.48   | 1.79   |
| K <sub>2</sub> O               | 0.01                    | 0.02  | 1.19   | 0.21   | 0.13  | 0.23   | 0.07   | 0.20   | 0.27   | 0.05   | 1.03   | 0.95   | 1.02   | 0.57   | 0.75   | 0.65   |
| P <sub>2</sub> O <sub>5</sub>  | 0.03                    | 0.04  | 0.04   | 0.22   | 0.05  | 0.11   | 8.00   | 0.05   | 0.12   | 0.05   | 0.20   | 0.14   | 0.07   | 0.24   | 0.19   | 0.19   |
| LOI                            | 1.02                    | 1.97  | 2.86   | 0.32   | 3.21  | 1.34   | 5.60   | 1.82   | 1.16   | 4.74   | 2.08   | 1.43   | 1.47   | 0.80   | 1.90   | 1.88   |
| TOL                            | 100.61                  | 99.72 | 100.88 | 100.43 | 99.80 | 100.80 | 100.60 | 100.81 | 100.80 | 101.00 | 100.81 | 101.00 | 101.40 | 101.34 | 101.54 | 101.46 |
| Trace(ppm)                     |                         |       |        |        |       |        |        |        |        |        |        |        |        |        |        |        |
| Li                             |                         |       |        |        |       |        |        |        |        |        |        |        |        |        |        |        |
| Be                             |                         |       |        |        |       |        |        |        |        |        |        |        |        |        |        |        |
| Sc                             | 30.7                    | 11.4  | 19.9   | 38.9   | 33.0  | 32.1   | 239    | 44.2   | 239    | 28.2   | 39.2   | 30.5   | 32.4   | 32.4   | 32.2   | 47.9   |
| V                              | 110                     | 41.0  | 94.0   | 365    | 108   | 115    | 104    | 146    | 115    | 97.0   | 378    | 141    | 181    | 236    | 277    | 266    |
| Cr                             | 402                     | 115   | 313    | 41.0   | 991   | 688    | 1120   | 1520   | 1610   | 1590   | 59.5   | 231    | 571    | 129    | 25.0   | 95.0   |
| Co                             | 51.2                    | 38.5  | 26.0   | 40.4   | 145   | 78.6   | 117    | 68.2   | 119    | 121    | 51.4   | 42.0   | 58.6   | 33.3   | 46.2   | 51.4   |
| Ni                             | 80.4                    | 105   | 56.1   | 32.5   | 1690  |        | 886    |        | 1400   | 884    | 60.3   | 168    | 482    | 30.3   | 180    | 255    |
| Cu                             | 39.2                    | 93.9  | 28.4   | 37.6   | 624   |        | 279    |        | 185    | 185    | 31.6   | 32.9   | 65.1   | 33.2   | 38.1   | 19.7   |
| Zn                             | 39.7                    | 234   | 25.6   | 129    | 84.1  | 73.3   | 118    | 47.3   | 75.8   | 75.8   | 107    | 67.8   | 94.9   | 89.1   | 90.7   | 94.3   |

Table S3: Continued

| Location  | Panzhihua intrusion     |       |       |       |       |       |       |       |       |       |       |       |       |       |       |       |
|-----------|-------------------------|-------|-------|-------|-------|-------|-------|-------|-------|-------|-------|-------|-------|-------|-------|-------|
| Sample    | PZH60                   | PZH61 | PZH62 | PZH63 | PZH26 | PZH27 | PZH30 | PZH31 | PZH32 | PZH33 | PZH34 | PZH35 | PZH37 | PZH39 | PZH43 | PZH44 |
| Rock type | Sub alkaline mafic rock |       |       |       |       |       |       |       |       |       |       |       |       |       |       |       |
| Reference | Zhou et al., 2006       |       |       |       |       |       |       |       |       |       |       |       |       |       |       |       |
| Age(Ma)   | 812                     |       |       |       |       |       |       |       |       |       |       |       |       |       |       |       |
| Ga        |                         |       |       |       |       |       |       |       |       |       |       |       |       |       |       |       |
| Ge        |                         |       |       |       |       |       |       |       |       |       |       |       |       |       |       |       |
| Rb        | 0.84                    | 1.60  | 17.0  | 1.65  | 1.88  | 3.79  | 1.02  | 2.42  | 4.19  | 0.66  | 17.7  | 25.0  | 30.6  | 12.1  | 12.2  | 15.7  |
| Sr        | 669                     | 965   | 988   | 680   | 90.0  | 273   | 103   | 112   | 246   | 71.0  | 696   | 731   | 721   | 998   | 830   | 427   |
| Y         | 3.06                    | 1.66  | 3.06  | 20.2  | 7.51  | 9.77  | 7.16  | 11.0  | 9.28  | 5.76  | 24.3  | 10.5  | 12.5  | 21.9  | 20.1  | 20.9  |
| Zr        | 8.60                    | 6.70  | 10.5  | 67.0  | 27.1  | 50.4  | 33.9  | 34.8  | 47.3  | 20.0  | 79.4  | 77.8  | 58.3  | 139   | 84.5  | 79.3  |
| Nb        | 0.23                    | 0.20  | 0.35  | 3.87  | 0.64  | 0.91  | 0.68  | 1.10  | 1.11  | 0.44  | 4.77  | 1.76  | 3.51  | 4.78  | 4.16  | 3.69  |
| Sn        |                         |       |       |       |       |       |       |       |       |       |       |       |       |       |       |       |
| Cs        | 0.06                    | 0.11  | 1.00  | 0.04  | 0.46  | 0.14  | 0.36  | 0.29  | 0.12  | 0.04  | 1.19  | 0.40  | 2.57  | 0.79  | 1.01  | 0.88  |
| Ba        | 58.0                    | 97.0  | 260   | 236   | 38.0  | 115   | 29.0  | 68.0  | 128   | 20.0  | 417   | 295   | 703   | 673   | 355   | 186   |
| La        | 1.57                    | 1.57  | 1.76  | 10.1  | 2.77  | 111   | 4.49  | 3.71  | 7.74  | 2.01  | 11.2  | 9.38  | 5.54  | 15.6  | 9.42  | 9.06  |
| Ce        | 2.98                    | 3.00  | 3.88  | 26.3  | 7.72  | 21.6  | 12.0  | 10.7  | 19.2  | 5.66  | 27.1  | 22.8  | 14.6  | 33.5  | 22.6  | 20.6  |
| Pr        | 0.45                    | 0.41  | 0.56  | 3.95  | 1.33  | 3.37  | 1.91  | 1.83  | 2.92  | 0.99  | 4.08  | 3.29  | 2.23  | 4.52  | 3.37  | 3.02  |
| Nd        | 2.27                    | 1.74  | 2.81  | 19.4  | 7.44  | 17.3  | 10.0  | 10.6  | 14.3  | 5.68  | 21.3  | 15.3  | 11.0  | 20.4  | 17.4  | 15.5  |
| Sm        | 0.63                    | 0.40  | 0.61  | 4.76  | 2.10  | 4.01  | 2.33  | 3.02  | 3.25  | 1.56  | 5.26  | 3.18  | 2.69  | 4.46  | 4.31  | 4.03  |
| Eu        | 0.46                    | 0.39  | 0.56  | 1.73  | 0.65  | 1.25  | 0.66  | 0.99  | 0.96  | 0.52  | 2.01  | 1.08  | 1.02  | 1.50  | 1.74  | 1.53  |
| Gd        | 0.66                    | 0.37  | 0.65  | 4.34  | 1.80  | 3.39  | 2.03  | 2.90  | 2.66  | 1.36  | 5.09  | 2.72  | 2.52  | 4.32  | 4.24  | 4.00  |
| Tb        | 0.11                    | 0.06  | 0.11  | 0.75  | 0.29  | 0.47  | 0.29  | 0.46  | 0.39  | 0.22  | 0.84  | 0.39  | 0.40  | 0.68  | 0.69  | 0.67  |
| Dy        | 0.62                    | 0.33  | 0.64  | 4.28  | 1.56  | 2.58  | 1.50  | 2.76  | 1.22  | 1.19  | 4.64  | 2.12  | 2.26  | 3.89  | 3.81  | 3.91  |
| Ho        | 0.13                    | 0.06  | 0.13  | 0.86  | 0.30  | 0.48  | 0.27  | 0.55  | 0.36  | 0.23  | 0.93  | 0.40  | 0.46  | 0.83  | 0.77  | 0.83  |
| Er        | 0.33                    | 0.17  | 0.34  | 2.33  | 0.75  | 1.19  | 0.73  | 1.35  | 0.93  | 0.61  | 2.49  | 1.09  | 1.26  | 2.29  | 2.13  | 2.20  |
| Tm        | 0.04                    | 0.02  | 0.04  | 0.29  | 0.11  | 0.14  | 0.11  | 0.19  | 0.13  | 0.08  | 0.33  | 0.16  | 0.18  | 0.33  | 0.29  | 0.31  |
| Yb        | 0.27                    | 0.15  | 0.28  | 1.90  | 0.64  | 0.82  | 0.55  | 1.12  | 0.74  | 0.49  | 2.01  | 0.93  | 1.08  | 2.17  | 1.72  | 1.96  |
| Lu        | 0.04                    | 0.02  | 0.04  | 0.28  | 0.10  | 0.13  | 0.08  | 0.16  | 0.11  | 0.07  | 0.30  | 0.13  | 0.17  | 0.33  | 0.25  | 0.28  |
| Hf        | 0.27                    | 0.20  | 0.33  | 2.19  | 0.88  | 1.59  | 0.89  | 1.40  | 1.22  | 0.63  | 2.13  | 1.85  | 1.45  | 3.36  | 2.15  | 2.17  |
| Ta        | 0.02                    | 0.02  | 0.02  | 0.18  | 0.04  | 0.06  | 0.04  | 0.05  | 0.06  | 0.03  | 0.26  | 0.10  | 0.18  | 0.27  | 0.22  | 0.22  |

Table S3: Continued

| Location                            | Panzhihua intrusion     |       |       |       |       |        |       |       |       |          |          |       |       |       |          |       |
|-------------------------------------|-------------------------|-------|-------|-------|-------|--------|-------|-------|-------|----------|----------|-------|-------|-------|----------|-------|
| Sample                              | PZH60                   | PZH61 | PZH62 | PZH63 | PZH26 | PZH27  | PZH30 | PZH31 | PZH32 | PZH33    | PZH34    | PZH35 | PZH37 | PZH39 | PZH43    | PZH44 |
| Rock type                           | Sub alkaline mafic rock |       |       |       |       |        |       |       |       |          |          |       |       |       |          |       |
| Reference                           | Zhou et al., 2006       |       |       |       |       |        |       |       |       |          |          |       |       |       |          |       |
| Age(Ma)                             | 812                     |       |       |       |       |        |       |       |       |          |          |       |       |       |          |       |
| Pb                                  | 0.84                    | 1.33  | 1.38  | 2.99  | 4.06  | 3.05   | 2.36  | 10.2  | 17.0  | 1.75     | 5.53     | 8.80  | 10.1  | 13.9  | 7.24     | 4.57  |
| Th                                  | 0.07                    | 0.08  | 0.07  | 0.17  | 0.31  | 0.63   | 1.00  | 0.47  | 0.77  | 0.15     | 0.74     | 1.01  | 0.44  | 2.36  | 0.85     | 0.71  |
| U                                   | 0.02                    | 0.02  | 0.02  | 0.05  | 0.09  | 0.16   | 0.16  | 0.12  | 0.17  | 0.05     | 0.24     | 0.28  | 0.21  | 0.68  | 0.26     | 0.55  |
| Isotopic date                       |                         |       |       |       |       |        |       |       |       |          |          |       |       |       |          |       |
| $^{87}\text{Sr}/^{86}\text{Sr}$ (t) | 0.704733                |       |       |       |       |        |       |       |       | 0.704339 | 0.704556 |       |       |       | 0.704617 |       |
| $\epsilon_{\text{Nd}}$ (t)          | 1.60                    |       |       |       |       |        |       |       |       | 4.70     | 4.00     |       |       |       | 3.50     |       |
| Ratio                               |                         |       |       |       |       |        |       |       |       |          |          |       |       |       |          |       |
| Mg#                                 | 79.4                    | 75.9  | 77.0  | 55.8  | 82.4  | 83.0   | 83.1  | 81.6  | 82.8  | 84.3     | 60.2     | 76.0  | 75.4  | 63.5  | 61.4     | 67.7  |
| Sr/Y                                | 219                     | 581   | 323   | 33.7  | 12.0  | 27.9   | 14.4  | 10.2  | 26.5  | 12.3     | 28.7     | 69.7  | 57.9  | 45.6  | 41.3     | 20.4  |
| Nb/La                               | 0.15                    | 0.13  | 0.20  | 0.38  | 0.23  | 0.0082 | 0.15  | 0.30  | 0.14  | 0.22     | 0.43     | 0.19  | 0.63  | 0.31  | 0.44     | 0.41  |
| Nb/U                                | 11.5                    | 10.0  | 17.5  | 77.4  | 7.11  | 5.69   | 4.25  | 9.17  | 6.53  | 8.80     | 19.9     | 6.29  | 16.7  | 7.03  | 16.0     | 6.71  |

Table S3: Continued

| Location                       | Lengshuiqing intrusion  |       |       |       |       |       |       |       |       |       |       |       |       |       |       |
|--------------------------------|-------------------------|-------|-------|-------|-------|-------|-------|-------|-------|-------|-------|-------|-------|-------|-------|
| Sample                         | LSZ9                    | LSZ38 | LSZ19 | LSZ20 | LSZ21 | LSZ26 | LSZ27 | LSZ28 | LSZ29 | LSZ30 | LSZ31 | LSZ52 | LSZ7  | LSZ11 | TD1   |
| Rock type                      | Sub alkaline mafic rock |       |       |       |       |       |       |       |       |       |       |       |       |       |       |
| Reference                      | Zhu et al., 2007        |       |       |       |       |       |       |       |       |       |       |       |       |       |       |
| Age(Ma)                        | 821                     |       |       |       |       |       |       |       |       |       |       |       |       |       | 825   |
| Major(wt.%)                    |                         |       |       |       |       |       |       |       |       |       |       |       |       |       |       |
| SiO <sub>2</sub>               | 46.23                   | 45.94 | 41.40 | 40.65 | 40.45 | 48.36 | 48.76 | 47.65 | 46.46 | 46.19 | 47.27 | 50.28 | 44.52 | 38.82 | 51.10 |
| TiO <sub>2</sub>               | 0.91                    | 1.68  | 0.38  | 0.34  | 0.59  | 1.23  | 1.15  | 0.64  | 1.42  | 1.81  | 0.81  | 0.78  | 1.12  | 0.53  | 1.32  |
| Al <sub>2</sub> O <sub>3</sub> | 6.31                    | 9.89  | 7.13  | 7.11  | 7.73  | 9.89  | 16.05 | 17.29 | 16.04 | 15.75 | 14.86 | 6.83  | 12.88 | 4.45  | 18.80 |
| Fe2O3T                         | 10.57                   | 11.65 | 16.42 | 15.78 | 14.47 | 10.69 | 9.67  | 7.62  | 11.53 | 12.44 | 7.99  | 10.63 | 11.84 | 13.53 | 8.64  |
| Fe <sub>2</sub> O <sub>3</sub> |                         |       |       |       |       |       |       |       |       |       |       |       |       |       |       |
| FeO                            |                         |       |       |       |       |       |       |       |       |       |       |       |       |       |       |
| MnO                            | 0.14                    | 0.17  | 0.18  | 0.16  | 0.16  | 0.18  | 0.16  | 0.12  | 0.19  | 0.16  | 0.13  | 0.18  | 0.11  | 0.13  | 0.14  |
| MgO                            | 18.05                   | 14.79 | 25.60 | 27.25 | 25.92 | 12.17 | 7.01  | 8.02  | 8.14  | 7.72  | 10.16 | 14.44 | 4.94  | 19.84 | 4.64  |
| CaO                            | 11.44                   | 10.86 | 2.18  | 4.74  | 4.06  | 12.64 | 9.37  | 10.21 | 8.25  | 9.60  | 11.31 | 11.52 | 7.42  | 6.95  | 8.53  |
| Na <sub>2</sub> O              | 1.35                    | 1.37  | 0.88  | 0.79  | 1.29  | 1.55  | 2.75  | 2.41  | 2.56  | 2.35  | 1.64  | 1.25  | 3.38  | 0.56  | 4.00  |
| K <sub>2</sub> O               | 0.23                    | 0.76  | 0.97  | 0.16  | 0.26  | 0.44  | 0.63  | 1.35  | 0.84  | 0.73  | 1.07  | 0.29  | 1.07  | 0.30  | 0.22  |
| P <sub>2</sub> O <sub>5</sub>  | 0.30                    | 0.21  | 0.15  | 0.07  | 0.08  | 0.14  | 0.24  | 0.10  | 0.26  | 0.25  | 0.16  | 0.10  | 0.93  | 0.16  | 0.36  |
| LOI                            | 3.63                    | 2.14  | 3.41  | 1.48  | 3.59  | 1.89  | 2.76  | 3.60  | 3.54  | 2.50  | 3.72  | 2.92  | 2.22  | 3.23  | 1.13  |
| TOL                            | 99.17                   | 99.46 | 98.69 | 98.53 | 98.61 | 99.18 | 98.53 | 99.01 | 99.23 | 99.49 | 99.12 | 99.21 |       |       | 99.00 |
| Trace(ppm)                     |                         |       |       |       |       |       |       |       |       |       |       |       |       |       |       |
| Li                             |                         |       |       |       |       |       |       |       |       |       |       |       |       |       |       |
| Be                             |                         |       |       |       |       |       |       |       |       |       |       |       |       |       |       |
| Sc                             | 37.3                    | 42.8  | 4.43  | 14.5  | 15.3  | 55.7  | 28.0  | 29.7  | 28.1  | 34.0  | 39.7  | 51.2  | 17.2  | 25.3  | 18.7  |
| V                              | 154                     | 222   | 64.8  | 86.7  | 111   | 276   | 221   | 160   | 237   | 355   | 162   | 194   | 143   | 104   | 179   |
| Cr                             | 1220                    | 1190  | 1880  | 2340  | 2080  | 1130  | 90.4  | 55.8  | 37.7  | 57.3  | 263   | 694   | 151   | 604   | 87.0  |
| Co                             | 87.0                    | 70.2  | 130   | 152   | 130   | 59.6  | 39.7  | 31.1  | 47.5  | 56.1  | 43.9  | 81.2  | 256   | 207   | 25.5  |
| Ni                             | 694                     | 486   | 855   | 1300  | 946   | 243   | 77.3  | 54.0  | 50.0  | 64.5  | 126   | 748   | 3320  | 2330  | 19.2  |
| Cu                             | 276                     | 64.4  | 37.7  | 37.7  | 120   | 45.5  | 51.1  | 8.83  | 31.4  | 41.2  | 26.8  | 619   | 1430  | 1080  |       |
| Zn                             | 61.6                    | 86.9  | 96.1  | 136   | 94.9  | 84.1  | 79.2  | 59.6  | 104   | 104   | 70.5  | 79.3  | 72.4  | 94.0  |       |

Table S3: Continued

| Location  | Lengshuiqing intrusion  |       |       |       |       |       |       |       |       |       |       |       |      |       |      |
|-----------|-------------------------|-------|-------|-------|-------|-------|-------|-------|-------|-------|-------|-------|------|-------|------|
| Sample    | LSZ9                    | LSZ38 | LSZ19 | LSZ20 | LSZ21 | LSZ26 | LSZ27 | LSZ28 | LSZ29 | LSZ30 | LSZ31 | LSZ52 | LSZ7 | LSZ11 | TD1  |
| Rock type | Sub alkaline mafic rock |       |       |       |       |       |       |       |       |       |       |       |      |       |      |
| Reference | Zhu et al., 2007        |       |       |       |       |       |       |       |       |       |       |       |      |       |      |
| Age(Ma)   | 821                     |       |       |       |       |       |       |       |       |       |       |       |      |       | 825  |
| Ga        | 8.93                    | 13.6  | 10.2  | 7.38  | 8.34  | 14.5  | 18.3  | 15.5  | 19.5  | 20.3  | 14.0  | 9.71  | 14.0 | 6.34  |      |
| Ge        |                         |       |       |       |       |       |       |       |       |       |       |       |      |       |      |
| Rb        | 2.33                    | 14.4  | 20.7  | 2.88  | 3.33  | 7.01  | 11.9  | 26.0  | 17.4  | 13.5  | 30.1  | 5.57  | 22.7 | 6.16  | 2.04 |
| Sr        | 231                     | 361   | 223   | 260   | 282   | 325   | 550   | 700   | 580   | 622   | 504   | 175   | 1090 | 199   | 1080 |
| Y         | 15.9                    | 21.7  | 7.79  | 5.07  | 6.97  | 21.0  | 18.4  | 10.3  | 19.1  | 18.0  | 15.8  | 17.1  | 22.2 | 10.5  | 7.03 |
| Zr        | 103                     | 108   | 78.7  | 28.9  | 37.4  | 92.1  | 95.3  | 47.2  | 109   | 139   | 62.5  | 69.2  | 150  | 64.9  | 37.2 |
| Nb        | 2.99                    | 3.76  | 2.68  | 0.91  | 1.22  | 2.43  | 3.88  | 1.52  | 4.13  | 3.32  | 2.29  | 1.20  | 5.29 | 1.56  | 4.00 |
| Sn        |                         |       |       |       |       |       |       |       |       |       |       |       |      |       |      |
| Cs        | 0.11                    | 0.81  | 1.13  | 0.057 | 0.078 | 0.42  | 0.79  | 0.87  | 0.85  | 0.82  | 1.33  | 0.26  | 0.92 | 0.57  | 0.20 |
| Ba        | 85.7                    | 289   | 467   | 99.0  | 133   | 153   | 217   | 567   | 271   | 338   | 326   | 79.1  | 956  | 131   | 354  |
| La        | 14.5                    | 11.1  | 7.50  | 2.76  | 3.41  | 7.38  | 10.2  | 5.62  | 11.1  | 11.9  | 5.89  | 6.77  | 37.8 | 8.77  | 11.5 |
| Ce        | 40.4                    | 31.1  | 16.0  | 6.55  | 8.30  | 17.5  | 23.5  | 12.5  | 26.4  | 25.5  | 14.7  | 19.3  | 80.9 | 22.2  | 25.4 |
| Pr        | 6.38                    | 5.00  | 2.12  | 0.93  | 1.19  | 2.62  | 3.16  | 1.76  | 3.73  | 3.46  | 2.26  | 3.37  | 10.9 | 3.39  | 3.31 |
| Nd        | 28.7                    | 25.0  | 9.21  | 4.28  | 5.56  | 12.5  | 13.9  | 7.95  | 16.7  | 14.6  | 10.8  | 16.3  | 44.2 | 15.3  | 15.0 |
| Sm        | 6.41                    | 6.22  | 1.86  | 1.02  | 1.41  | 3.62  | 3.25  | 1.98  | 3.90  | 3.73  | 2.98  | 4.50  | 8.48 | 3.75  | 2.82 |
| Eu        | 1.76                    | 2.15  | 0.67  | 0.46  | 0.59  | 1.36  | 1.20  | 1.02  | 1.45  | 1.46  | 1.15  | 1.38  | 2.33 | 1.12  | 1.51 |
| Gd        | 4.95                    | 5.19  | 1.65  | 0.96  | 1.35  | 3.40  | 2.94  | 1.81  | 3.48  | 3.29  | 2.67  | 3.64  | 6.46 | 2.82  | 2.27 |
| Tb        | 0.70                    | 0.79  | 0.25  | 0.16  | 0.21  | 0.59  | 0.49  | 0.29  | 0.56  | 0.54  | 0.46  | 0.58  | 0.80 | 0.43  | 0.30 |
| Dy        | 3.72                    | 4.73  | 1.42  | 0.98  | 1.39  | 3.86  | 3.13  | 1.82  | 3.44  | 3.23  | 2.82  | 3.32  | 4.23 | 2.18  | 1.47 |
| Ho        | 0.70                    | 0.92  | 0.31  | 0.20  | 0.28  | 0.79  | 0.63  | 0.38  | 0.70  | 0.65  | 0.58  | 0.65  | 0.76 | 0.42  | 0.25 |
| Er        | 1.67                    | 2.33  | 0.85  | 0.53  | 0.72  | 1.96  | 1.70  | 0.98  | 1.79  | 1.73  | 1.47  | 1.58  | 1.98 | 1.01  | 0.69 |
| Tm        | 0.24                    | 0.32  | 0.12  | 0.081 | 0.10  | 0.28  | 0.25  | 0.14  | 0.25  | 0.24  | 0.21  | 0.23  | 0.24 | 0.14  | 0.09 |
| Yb        | 1.27                    | 1.91  | 0.80  | 0.49  | 0.62  | 1.75  | 1.61  | 0.87  | 1.64  | 1.56  | 1.30  | 1.45  | 1.49 | 0.83  | 0.49 |
| Lu        | 0.20                    | 0.28  | 0.13  | 0.075 | 0.094 | 0.27  | 0.24  | 0.13  | 0.25  | 0.23  | 0.19  | 0.22  | 0.21 | 0.11  | 0.08 |
| Hf        | 2.97                    | 3.67  | 2.08  | 0.79  | 0.98  | 2.58  | 2.51  | 1.27  | 2.75  | 3.19  | 1.69  | 2.01  | 3.82 | 1.80  | 0.94 |
| Ta        | 0.27                    | 0.28  | 0.18  | 0.085 | 0.10  | 0.18  | 0.24  | 0.10  | 0.25  | 0.20  | 0.15  | 0.078 | 0.37 | 0.10  | 0.19 |

Table S3: Continued

| Location                            | Lengshuiqing intrusion  |       |       |          |       |       |       |       |       |          |       |       |      |          |          |
|-------------------------------------|-------------------------|-------|-------|----------|-------|-------|-------|-------|-------|----------|-------|-------|------|----------|----------|
| Sample                              | LSZ9                    | LSZ38 | LSZ19 | LSZ20    | LSZ21 | LSZ26 | LSZ27 | LSZ28 | LSZ29 | LSZ30    | LSZ31 | LSZ52 | LSZ7 | LSZ11    | TD1      |
| Rock type                           | Sub alkaline mafic rock |       |       |          |       |       |       |       |       |          |       |       |      |          |          |
| Reference                           | Zhu et al., 2007        |       |       |          |       |       |       |       |       |          |       |       |      |          |          |
| Age(Ma)                             | 821                     |       |       |          |       |       |       |       |       |          |       |       |      |          | 825      |
| Pb                                  | 5.98                    | 9.37  | 4.89  | 15.4     | 1.34  | 20.5  | 15.3  | 5.38  | 8.06  | 5.94     | 5.29  | 10.6  | 17.0 | 6.99     | 3.59     |
| Th                                  | 0.94                    | 1.28  | 0.89  | 0.26     | 0.31  | 0.74  | 1.10  | 0.46  | 0.92  | 1.10     | 0.49  | 0.72  | 3.76 | 0.73     | 0.13     |
| U                                   | 0.24                    | 0.35  | 0.25  | 0.07     | 0.094 | 0.20  | 0.33  | 0.11  | 0.22  | 0.31     | 0.22  | 0.27  | 1.07 | 0.22     | 0.02     |
| Isotopic date                       |                         |       |       |          |       |       |       |       |       |          |       |       |      |          |          |
| $^{87}\text{Sr}/^{86}\text{Sr}$ (t) |                         |       |       | 0.704430 |       |       |       |       |       | 0.704370 |       |       |      | 0.704220 | 0.705196 |
| $\epsilon_{\text{Nd}}$ (t)          |                         |       |       | 4.30     |       |       |       |       |       | 2.20     |       |       |      | 4.90     | 0.93     |
| Ratio                               |                         |       |       |          |       |       |       |       |       |          |       |       |      |          |          |
| Mg#                                 | 79.9                    | 74.7  | 78.4  | 80.1     | 80.7  | 72.6  | 62.8  | 71.0  | 62.2  | 59.1     | 74.8  | 76.0  | 49.3 | 77.4     | 55.6     |
| Sr/Y                                | 14.5                    | 16.6  | 28.6  | 51.3     | 40.5  | 15.5  | 29.9  | 68.0  | 30.4  | 34.6     | 31.9  | 10.2  | 49.3 | 19.0     | 154      |
| Nb/La                               | 0.21                    | 0.34  | 0.36  | 0.33     | 0.36  | 0.33  | 0.38  | 0.27  | 0.37  | 0.28     | 0.39  | 0.18  | 0.14 | 0.18     | 0.35     |
| Nb/U                                | 12.7                    | 10.7  | 10.6  | 13.0     | 13.0  | 12.0  | 11.8  | 14.3  | 18.8  | 10.7     | 10.4  | 4.41  | 4.94 | 7.12     | 200      |



| Location                         |       |       |       |       |       |       |       |        |       |       |       |       |       |       |       |       |
|----------------------------------|-------|-------|-------|-------|-------|-------|-------|--------|-------|-------|-------|-------|-------|-------|-------|-------|
| Sample                           | TD2   | TD3   | TD4   | TD5   | TD6   | TD8   | TD9   | TD10   | TD11  | TD12  | TD13  | TD14  | TD15  | TD16  | TD17  | TD18  |
| Rock type                        |       |       |       |       |       |       |       |        |       |       |       |       |       |       |       |       |
| Reference                        |       |       |       |       |       |       |       |        |       |       |       |       |       |       |       |       |
| Age(Ma)                          |       |       |       |       |       |       |       |        |       |       |       |       |       |       |       |       |
| Major(wt.%)                      |       |       |       |       |       |       |       |        |       |       |       |       |       |       |       |       |
| SiO <sub>2</sub>                 | 51.80 | 51.00 | 51.40 | 51.40 | 51.10 | 51.90 | 50.80 | 52.80  | 52.00 | 51.90 | 51.20 | 51.20 | 51.50 | 50.70 | 48.00 | 49.30 |
| TiO <sub>2</sub>                 | 1.28  | 1.34  | 1.31  | 1.34  | 1.36  | 1.48  | 1.34  | 1.24   | 1.33  | 1.21  | 1.30  | 1.37  | 1.27  | 1.31  | 1.46  | 1.50  |
| Al <sub>2</sub> O <sub>3</sub>   | 19.50 | 19.20 | 19.40 | 19.10 | 19.30 | 19.60 | 20.00 | 19.70  | 19.40 | 19.80 | 19.30 | 19.10 | 19.40 | 19.70 | 17.90 | 18.80 |
| Fe <sub>2</sub> O <sub>3</sub> T | 8.03  | 8.58  | 8.38  | 8.44  | 8.43  | 8.20  | 8.22  | 8.05   | 8.18  | 7.37  | 8.20  | 8.44  | 8.36  | 8.48  | 10.49 | 9.82  |
| Fe <sub>2</sub> O <sub>3</sub>   |       |       |       |       |       |       |       |        |       |       |       |       |       |       |       |       |
| FeO                              |       |       |       |       |       |       |       |        |       |       |       |       |       |       |       |       |
| MnO                              | 0.13  | 0.13  | 0.13  | 0.14  | 0.13  | 0.12  | 0.11  | 0.13   | 0.13  | 0.12  | 0.13  | 0.13  | 0.13  | 0.13  | 0.20  | 0.15  |
| MgO                              | 4.19  | 4.38  | 4.46  | 4.45  | 4.32  | 4.13  | 4.48  | 4.37   | 4.20  | 3.97  | 4.32  | 4.37  | 4.27  | 4.12  | 5.21  | 5.01  |
| CaO                              | 8.43  | 8.69  | 8.72  | 8.95  | 8.72  | 8.69  | 8.95  | 8.37   | 8.49  | 8.01  | 8.37  | 8.44  | 8.65  | 9.02  | 11.84 | 9.04  |
| Na <sub>2</sub> O                | 4.25  | 4.02  | 4.12  | 4.05  | 4.22  | 4.36  | 4.52  | 4.67   | 4.29  | 4.59  | 4.19  | 4.33  | 4.19  | 4.25  | 3.08  | 3.92  |
| K <sub>2</sub> O                 | 0.33  | 0.21  | 0.24  | 0.26  | 0.24  | 0.18  | 0.36  | 0.25   | 0.28  | 0.27  | 0.30  | 0.24  | 0.33  | 0.23  | 0.21  | 0.13  |
| P <sub>2</sub> O <sub>5</sub>    | 0.34  | 0.35  | 0.37  | 0.36  | 0.36  | 0.40  | 0.40  | 0.34   | 0.35  | 0.32  | 0.36  | 0.35  | 0.35  | 0.36  | 0.37  | 0.30  |
| LOI                              | 0.70  | 0.78  | 0.63  | 0.56  | 0.61  | 0.43  | 0.77  | 0.84   | 0.56  | 1.56  | 1.37  | 0.63  | 0.40  | 0.56  | 0.60  | 0.69  |
| TOL                              | 99.00 | 98.70 | 99.10 | 99.10 | 98.80 | 99.50 | 99.90 | 100.80 | 99.20 | 99.10 | 99.10 | 98.60 | 98.80 | 98.90 | 99.50 | 98.70 |
| Trace(ppm)                       |       |       |       |       |       |       |       |        |       |       |       |       |       |       |       |       |
| Li                               |       |       |       |       |       |       |       |        |       |       |       |       |       |       |       |       |
| Be                               |       |       |       |       |       |       |       |        |       |       |       |       |       |       |       |       |
| Sc                               | 16.0  | 16.9  | 16.0  | 17.0  | 16.9  | 15.2  | 22.1  | 15.5   | 15.8  | 15.3  | 17.8  | 16.2  | 16.3  | 18.3  | 29.1  | 18.4  |
| V                                | 161   | 191   | 170   | 161   | 163   | 156   | 177   | 150    | 157   | 148   | 167   | 168   | 176   | 171   | 248   | 201   |
| Cr                               | 67.4  | 38.1  | 64.9  | 89.2  | 76.9  | 55.8  | 62.4  | 63.3   | 63.2  | 58.5  | 69.4  | 67.7  | 75.7  | 53.5  | 41.7  | 84.8  |
| Co                               | 22.4  | 24.1  | 22.8  | 22.3  | 21.8  | 21.2  | 23.1  | 21.0   | 22.2  | 20.3  | 22.7  | 23.4  | 23.0  | 23.4  | 28.4  | 27.3  |
| Ni                               | 16.2  | 17.0  | 16.0  | 16.0  | 16.2  | 15.8  | 17.6  | 15.3   | 15.3  | 14.8  | 18.6  | 16.2  | 19.1  | 20.6  | 17.7  | 27.2  |
| Cu                               |       |       |       |       |       |       |       |        |       |       |       |       |       |       |       |       |
| Zn                               |       |       |       |       |       |       |       |        |       |       |       |       |       |       |       |       |

**Table S3: Continued**

| Location  |      |      |      |      |      |      |      |      |      |      |      |      |      |      |      |      |
|-----------|------|------|------|------|------|------|------|------|------|------|------|------|------|------|------|------|
| Sample    | TD2  | TD3  | TD4  | TD5  | TD6  | TD8  | TD9  | TD10 | TD11 | TD12 | TD13 | TD14 | TD15 | TD16 | TD17 | TD18 |
| Rock type |      |      |      |      |      |      |      |      |      |      |      |      |      |      |      |      |
| Reference |      |      |      |      |      |      |      |      |      |      |      |      |      |      |      |      |
| Age(Ma)   |      |      |      |      |      |      |      |      |      |      |      |      |      |      |      |      |
| Ga        |      |      |      |      |      |      |      |      |      |      |      |      |      |      |      |      |
| Ge        |      |      |      |      |      |      |      |      |      |      |      |      |      |      |      |      |
| Rb        | 1.71 | 1.20 | 0.90 | 0.86 | 0.42 | 0.38 | 1.50 | 1.16 | 0.83 | 2.12 | 2.38 | 0.74 | 1.00 | 0.52 | 1.11 | 0.33 |
| Sr        | 1100 | 1080 | 1100 | 1090 | 1110 | 1120 | 1110 | 1080 | 1120 | 1170 | 1110 | 1120 | 1160 | 1140 | 837  | 859  |
| Y         | 6.73 | 6.92 | 6.90 | 6.83 | 7.72 | 6.85 | 16.1 | 6.90 | 7.14 | 6.74 | 6.89 | 6.53 | 7.26 | 8.34 | 15.1 | 8.92 |
| Zr        | 51.9 | 27.7 | 43.0 | 37.8 | 57.1 | 40.4 | 42.6 | 57.9 | 62.0 | 63.3 | 38.6 | 68.4 | 59.9 | 78.1 | 53.6 | 50.8 |
| Nb        | 4.29 | 4.17 | 4.02 | 4.03 | 4.39 | 4.59 | 4.78 | 4.80 | 4.01 | 4.06 | 3.91 | 4.07 | 4.06 | 4.26 | 2.64 | 4.63 |
| Sn        |      |      |      |      |      |      |      |      |      |      |      |      |      |      |      |      |
| Cs        | 0.14 | 0.19 | 0.09 | 0.06 | 0.03 | 0.06 | 0.10 | 0.24 | 0.14 | 0.33 | 0.17 | 0.08 | 0.07 | 0.05 | 0.04 | 0.03 |
| Ba        | 463  | 382  | 429  | 434  | 431  | 460  | 460  | 437  | 494  | 372  | 339  | 395  | 454  | 421  | 268  | 275  |
| La        | 12.5 | 12.0 | 12.3 | 11.4 | 12.4 | 13.1 | 15.3 | 12.4 | 13.0 | 12.5 | 12.2 | 12.1 | 12.3 | 13.5 | 10.8 | 11.2 |
| Ce        | 26.8 | 26.4 | 26.8 | 24.7 | 27.8 | 29.1 | 39.8 | 27.0 | 28.0 | 27.3 | 26.9 | 26.1 | 27.8 | 30.0 | 25.2 | 25.4 |
| Pr        | 3.51 | 3.51 | 3.58 | 3.35 | 3.77 | 3.81 | 5.90 | 3.65 | 3.73 | 3.57 | 3.51 | 3.44 | 3.71 | 4.02 | 3.58 | 3.50 |
| Nd        | 15.3 | 15.6 | 16.2 | 15.2 | 17.2 | 17.2 | 28.5 | 16.0 | 16.5 | 15.8 | 15.6 | 15.1 | 16.2 | 17.8 | 16.7 | 15.9 |
| Sm        | 2.92 | 3.06 | 3.17 | 3.07 | 3.38 | 3.36 | 6.46 | 3.19 | 3.21 | 2.96 | 2.96 | 2.80 | 3.10 | 3.58 | 3.80 | 3.50 |
| Eu        | 1.62 | 1.61 | 1.61 | 1.57 | 1.69 | 1.65 | 2.25 | 1.55 | 1.61 | 1.67 | 1.58 | 1.55 | 1.60 | 1.77 | 1.67 | 1.77 |
| Gd        | 2.31 | 2.53 | 2.48 | 2.51 | 2.76 | 2.60 | 5.29 | 2.48 | 2.59 | 2.42 | 2.28 | 2.31 | 2.39 | 2.77 | 3.86 | 2.96 |
| Tb        | 0.30 | 0.32 | 0.32 | 0.32 | 0.37 | 0.33 | 0.73 | 0.32 | 0.33 | 0.31 | 0.30 | 0.29 | 0.31 | 0.36 | 0.55 | 0.39 |
| Dy        | 1.40 | 1.52 | 1.59 | 1.55 | 1.76 | 1.59 | 3.74 | 1.57 | 1.59 | 1.49 | 1.45 | 1.40 | 1.52 | 1.74 | 3.05 | 2.00 |
| Ho        | 0.25 | 0.27 | 0.29 | 0.28 | 0.31 | 0.28 | 0.66 | 0.27 | 0.28 | 0.26 | 0.26 | 0.24 | 0.26 | 0.31 | 0.61 | 0.36 |
| Er        | 0.69 | 0.73 | 0.75 | 0.73 | 0.82 | 0.73 | 1.76 | 0.74 | 0.78 | 0.72 | 0.72 | 0.69 | 0.72 | 0.85 | 1.74 | 1.01 |
| Tm        | 0.08 | 0.09 | 0.09 | 0.09 | 0.10 | 0.09 | 0.22 | 0.09 | 0.10 | 0.08 | 0.09 | 0.08 | 0.09 | 0.10 | 0.23 | 0.13 |
| Yb        | 0.50 | 0.56 | 0.55 | 0.54 | 0.65 | 0.57 | 1.31 | 0.57 | 0.65 | 0.52 | 0.54 | 0.47 | 0.61 | 0.61 | 1.41 | 0.81 |
| Lu        | 0.07 | 0.08 | 0.08 | 0.09 | 0.09 | 0.08 | 0.19 | 0.09 | 0.09 | 0.08 | 0.07 | 0.07 | 0.08 | 0.09 | 0.23 | 0.12 |
| Hf        | 1.43 | 0.82 | 1.12 | 1.04 | 1.51 | 1.10 | 1.44 | 1.51 | 1.50 | 1.50 | 0.98 | 1.49 | 1.43 | 1.60 | 1.63 | 1.35 |
| Ta        | 0.33 | 0.21 | 0.23 | 0.20 | 0.21 | 0.24 | 0.23 | 0.68 | 0.21 | 0.39 | 0.19 | 0.20 | 0.20 | 0.21 | 0.18 | 0.25 |

Table S3: Continued

| Location                               |      |      |      |      |      |      |          |      |      |      |      |       |          |      |      |      |
|----------------------------------------|------|------|------|------|------|------|----------|------|------|------|------|-------|----------|------|------|------|
| Sample                                 | TD2  | TD3  | TD4  | TD5  | TD6  | TD8  | TD9      | TD10 | TD11 | TD12 | TD13 | TD14  | TD15     | TD16 | TD17 | TD18 |
| Rock type                              |      |      |      |      |      |      |          |      |      |      |      |       |          |      |      |      |
| Reference                              |      |      |      |      |      |      |          |      |      |      |      |       |          |      |      |      |
| Age(Ma)                                |      |      |      |      |      |      |          |      |      |      |      |       |          |      |      |      |
| Pb                                     | 4.36 | 4.40 | 4.06 | 6.04 | 4.12 | 9.60 | 4.68     | 4.71 | 4.79 | 4.43 | 3.82 | 3.68  | 4.01     | 4.02 | 6.35 | 3.63 |
| Th                                     | 0.18 | 0.13 | 0.12 | 0.12 | 0.09 | 0.07 | 0.14     | 0.14 | 0.13 | 0.10 | 0.10 | 0.080 | 0.11     | 0.10 | 0.70 | 0.10 |
| U                                      | 0.04 | 0.03 | 0.03 | 0.03 | 0.02 | 0.02 | 0.04     | 0.05 | 0.04 | 0.03 | 0.02 | 0.01  | 0.03     | 0.03 | 0.19 | 0.06 |
| Isotopic date                          |      |      |      |      |      |      |          |      |      |      |      |       |          |      |      |      |
| <sup>87</sup> Sr/ <sup>86</sup> Sr (t) |      |      |      |      |      |      | 0.705245 |      |      |      |      |       | 0.705063 |      |      |      |
| ε <sub>Nd</sub> (t)                    |      |      |      |      |      |      | 1.22     |      |      |      |      |       | 0.90     |      |      |      |
| Ratio                                  |      |      |      |      |      |      |          |      |      |      |      |       |          |      |      |      |
| Mg#                                    | 54.9 | 54.3 | 55.4 | 55.1 | 54.4 | 54.0 | 56.0     | 55.9 | 54.5 | 55.7 | 55.1 | 54.7  | 54.3     | 53.1 | 53.6 | 54.3 |
| Sr/Y                                   | 164  | 156  | 159  | 160  | 143  | 163  | 69.0     | 157  | 157  | 173  | 161  | 171   | 160      | 136  | 55.6 | 96.3 |
| Nb/La                                  | 0.34 | 0.35 | 0.33 | 0.35 | 0.35 | 0.35 | 0.31     | 0.39 | 0.31 | 0.32 | 0.32 | 0.34  | 0.33     | 0.32 | 0.24 | 0.41 |
| Nb/U                                   | 107  | 139  | 134  | 134  | 220  | 230  | 120      | 96.0 | 100  | 135  | 196  | 407   | 135      | 142  | 13.9 | 77.2 |

**Table S3: Continued**

| Location                         |                         |       |        |       |       |       |       |       |       |       |        |        |       |       |       |        |
|----------------------------------|-------------------------|-------|--------|-------|-------|-------|-------|-------|-------|-------|--------|--------|-------|-------|-------|--------|
| Sample                           | TD19                    | TD20  | TD21   | TD23  | TD24  | TD25  | TD26  | TD27  | TD28  | TD30  | TD31   | TD32   | TD33  | TD34  | TD35  | TD36   |
| Rock type                        | Sub alkaline mafic rock |       |        |       |       |       |       |       |       |       |        |        |       |       |       |        |
| Reference                        | Sun, 2009               |       |        |       |       |       |       |       |       |       |        |        |       |       |       |        |
| Age(Ma)                          |                         |       |        |       |       |       |       |       |       |       |        |        |       |       |       |        |
| Major(wt.%)                      |                         |       |        |       |       |       |       |       |       |       |        |        |       |       |       |        |
| SiO <sub>2</sub>                 | 51.00                   | 51.80 | 56.40  | 54.70 | 52.00 | 52.60 | 52.80 | 52.90 | 48.70 | 58.30 | 54.00  | 54.90  | 47.80 | 56.50 | 46.60 | 46.10  |
| TiO <sub>2</sub>                 | 1.28                    | 1.25  | 1.12   | 0.58  | 0.77  | 1.50  | 1.24  | 0.60  | 1.29  | 0.40  | 1.36   | 1.35   | 1.83  | 0.76  | 1.76  | 1.22   |
| Al <sub>2</sub> O <sub>3</sub>   | 19.90                   | 19.90 | 16.80  | 17.00 | 16.40 | 19.70 | 19.50 | 17.70 | 18.60 | 16.90 | 20.30  | 20.60  | 18.10 | 18.50 | 17.20 | 18.80  |
| Fe <sub>2</sub> O <sub>3</sub> T | 8.21                    | 8.10  | 8.03   | 6.84  | 7.02  | 9.15  | 8.09  | 6.72  | 9.11  | 5.78  | 9.36   | 9.48   | 11.28 | 6.35  | 12.87 | 11.77  |
| Fe <sub>2</sub> O <sub>3</sub>   |                         |       |        |       |       |       |       |       |       |       |        |        |       |       |       |        |
| FeO                              |                         |       |        |       |       |       |       |       |       |       |        |        |       |       |       |        |
| MnO                              | 0.13                    | 0.12  | 0.13   | 0.12  | 0.11  | 0.16  | 0.14  | 0.14  | 0.13  | 0.12  | 0.16   | 0.15   | 0.14  | 0.13  | 0.19  | 0.17   |
| MgO                              | 4.12                    | 3.87  | 4.24   | 5.45  | 6.57  | 2.74  | 3.26  | 5.58  | 5.43  | 4.92  | 5.87   | 6.41   | 6.30  | 3.42  | 6.57  | 7.00   |
| CaO                              | 8.62                    | 8.40  | 6.71   | 10.13 | 10.59 | 7.76  | 8.04  | 9.78  | 9.73  | 8.61  | 9.17   | 10.08  | 9.42  | 7.21  | 9.19  | 10.60  |
| Na <sub>2</sub> O                | 4.55                    | 4.47  | 3.55   | 2.97  | 2.62  | 4.44  | 4.34  | 3.08  | 3.39  | 3.19  | 3.58   | 3.52   | 3.12  | 4.33  | 2.61  | 2.41   |
| K <sub>2</sub> O                 | 0.30                    | 0.38  | 1.57   | 0.29  | 0.47  | 0.24  | 0.46  | 0.86  | 0.83  | 0.29  | 0.24   | 0.23   | 0.39  | 0.43  | 0.46  | 0.29   |
| P <sub>2</sub> O <sub>5</sub>    | 0.35                    | 0.35  | 0.31   | 0.10  | 0.16  | 0.48  | 0.29  | 0.16  | 0.20  | 0.09  | 0.36   | 0.41   | 0.20  | 0.19  | 0.51  | 0.58   |
| LOI                              | 1.26                    | 0.43  | 1.08   | 0.96  | 2.76  | 0.40  | 0.99  | 1.33  | 1.72  | 1.18  | 1.27   | 1.10   | 1.22  | 0.87  | 1.82  | 1.10   |
| TOL                              | 99.80                   | 99.10 | 100.00 | 99.20 | 99.50 | 99.20 | 99.10 | 98.90 | 99.10 | 99.90 | 105.60 | 108.20 | 99.70 | 98.70 | 99.80 | 100.00 |
| Trace(ppm)                       |                         |       |        |       |       |       |       |       |       |       |        |        |       |       |       |        |
| Li                               |                         |       |        |       |       |       |       |       |       |       |        |        |       |       |       |        |
| Be                               |                         |       |        |       |       |       |       |       |       |       |        |        |       |       |       |        |
| Sc                               | 16.4                    | 14.3  | 14.5   | 25.1  | 25.6  | 15.8  | 17.5  | 26.3  | 26.4  | 22.3  | 18.8   | 22.0   | 25.4  | 14.9  | 26.8  | 19.6   |
| V                                | 155                     | 143   | 126    | 167   | 157   | 75.0  | 178   | 118   | 247   | 99.0  | 189    | 181    | 274   | 104   | 278   | 235    |
| Cr                               | 50.5                    | 82.7  | 97.0   | 136   | 269   | 3.80  | 11.6  | 53.5  | 101   | 235   | 78.1   | 131    | 27.0  | 55.7  | 82.6  | 65.1   |
| Co                               | 20.3                    | 19.2  | 21.7   | 25.5  | 29.5  | 11.9  | 20.6  | 26.1  | 30.8  | 19.5  | 24.9   | 26.0   | 33.6  | 15.8  | 45.5  | 34.2   |
| Ni                               | 13.0                    | 28.3  | 28.0   | 39.0  | 59.4  | 2.10  | 5.70  | 20.4  | 27.8  | 46.9  | 21.0   | 30.0   | 16.8  | 15.8  | 21.1  | 23.9   |
| Cu                               |                         |       |        |       |       |       |       |       |       |       |        |        |       |       |       |        |
| Zn                               |                         |       |        |       |       |       |       |       |       |       |        |        |       |       |       |        |

Table S3: Continued

| Location  |                         |      |      |      |      |      |      |      |      |      |      |      |      |      |      | 1    |
|-----------|-------------------------|------|------|------|------|------|------|------|------|------|------|------|------|------|------|------|
| Sample    | TD19                    | TD20 | TD21 | TD23 | TD24 | TD25 | TD26 | TD27 | TD28 | TD30 | TD31 | TD32 | TD33 | TD34 | TD35 | TD36 |
| Rock type | Sub alkaline mafic rock |      |      |      |      |      |      |      |      |      |      |      |      |      |      |      |
| Reference | Sun, 2009               |      |      |      |      |      |      |      |      |      |      |      |      |      |      |      |
| Age(Ma)   |                         |      |      |      |      |      |      |      |      |      |      |      |      |      |      |      |
| Ga        |                         |      |      |      |      |      |      |      |      |      |      |      |      |      |      |      |
| Ge        |                         |      |      |      |      |      |      |      |      |      |      |      |      |      |      |      |
| Rb        | 1.27                    | 1.50 | 17.9 | 1.27 | 3.09 | 0.99 | 2.76 | 9.24 | 7.93 | 2.32 | 1.35 | 1.56 | 1.74 | 2.71 | 5.18 | 2.90 |
| Sr        | 1120                    | 1150 | 755  | 643  | 653  | 961  | 866  | 591  | 864  | 742  | 963  | 903  | 788  | 847  | 789  | 811  |
| Y         | 11.7                    | 10.4 | 9.39 | 9.31 | 8.57 | 10.2 | 9.46 | 10.5 | 10.1 | 13.0 | 10.2 | 12.5 | 14.5 | 8.99 | 13.7 | 13.2 |
| Zr        | 84.4                    | 87.6 | 58.3 | 30.6 | 44.0 | 176  | 220  | 94.0 | 58.1 | 57.0 | 80.8 | 69.2 | 139  | 154  | 34.5 | 51.4 |
| Nb        | 4.34                    | 4.44 | 5.19 | 1.97 | 2.10 | 6.11 | 4.84 | 2.97 | 3.97 | 1.91 | 4.05 | 4.49 | 5.57 | 3.55 | 3.00 | 2.78 |
| Sn        |                         |      |      |      |      |      |      |      |      |      |      |      |      |      |      |      |
| Cs        | 0.13                    | 0.10 | 1.33 | 0.06 | 0.09 | 0.09 | 0.20 | 0.29 | 0.13 | 0.08 | 0.11 | 0.09 | 0.11 | 0.18 | 0.25 | 0.20 |
| Ba        | 366                     | 495  | 1010 | 269  | 385  | 567  | 566  | 359  | 421  | 603  | 369  | 403  | 475  | 693  | 282  | 315  |
| La        | 14.4                    | 14.8 | 16.1 | 8.20 | 10.7 | 11.6 | 15.2 | 11.1 | 12.0 | 9.90 | 13.4 | 13.6 | 13.0 | 13.6 | 10.2 | 14.0 |
| Ce        | 35.4                    | 35.0 | 36.0 | 21.2 | 24.8 | 24.9 | 31.5 | 22.2 | 29.2 | 24.8 | 29.4 | 32.9 | 33.9 | 28.2 | 26.7 | 34.0 |
| Pr        | 4.99                    | 4.84 | 4.62 | 3.08 | 3.27 | 3.44 | 3.96 | 2.75 | 3.80 | 3.64 | 3.97 | 4.59 | 4.90 | 3.54 | 4.16 | 4.61 |
| Nd        | 23.2                    | 22.1 | 19.4 | 13.5 | 13.9 | 15.9 | 16.0 | 11.7 | 16.1 | 16.9 | 17.3 | 21.2 | 22.5 | 15.0 | 20.2 | 21.1 |
| Sm        | 4.81                    | 4.48 | 3.69 | 2.84 | 2.87 | 3.48 | 2.94 | 2.53 | 3.24 | 3.66 | 3.70 | 4.52 | 4.99 | 2.90 | 4.74 | 4.40 |
| Eu        | 1.85                    | 1.72 | 1.32 | 0.97 | 1.04 | 2.00 | 1.62 | 1.06 | 1.45 | 1.63 | 1.53 | 1.70 | 1.91 | 1.33 | 1.87 | 1.64 |
| Gd        | 3.90                    | 3.48 | 2.99 | 2.41 | 2.44 | 3.11 | 2.41 | 2.35 | 2.84 | 3.38 | 3.10 | 3.77 | 4.25 | 2.49 | 4.27 | 3.83 |
| Tb        | 0.52                    | 0.47 | 0.41 | 0.34 | 0.34 | 0.42 | 0.34 | 0.34 | 0.38 | 0.48 | 0.42 | 0.53 | 0.60 | 0.34 | 0.57 | 0.52 |
| Dy        | 2.62                    | 2.32 | 2.01 | 1.83 | 1.79 | 2.13 | 1.80 | 2.01 | 2.02 | 2.57 | 2.16 | 2.69 | 3.19 | 1.82 | 3.08 | 2.75 |
| Ho        | 0.46                    | 0.41 | 0.36 | 0.35 | 0.32 | 0.38 | 0.34 | 0.37 | 0.36 | 0.48 | 0.39 | 0.48 | 0.57 | 0.35 | 0.55 | 0.53 |
| Er        | 1.29                    | 1.11 | 1.04 | 1.00 | 0.90 | 1.10 | 1.01 | 1.12 | 1.04 | 1.37 | 1.09 | 1.38 | 1.61 | 1.00 | 1.51 | 1.43 |
| Tm        | 0.16                    | 0.15 | 0.15 | 0.13 | 0.12 | 0.13 | 0.14 | 0.15 | 0.14 | 0.19 | 0.15 | 0.18 | 0.21 | 0.14 | 0.19 | 0.18 |
| Yb        | 1.03                    | 0.87 | 0.90 | 0.90 | 0.77 | 0.86 | 0.93 | 1.06 | 0.86 | 1.21 | 0.87 | 1.14 | 1.35 | 0.91 | 1.16 | 1.19 |
| Lu        | 0.14                    | 0.13 | 0.13 | 0.14 | 0.12 | 0.12 | 0.15 | 0.17 | 0.13 | 0.17 | 0.13 | 0.16 | 0.20 | 0.15 | 0.17 | 0.17 |
| Hf        | 2.29                    | 2.32 | 1.85 | 1.17 | 1.45 | 3.36 | 4.24 | 2.36 | 1.58 | 1.53 | 2.18 | 1.98 | 3.52 | 3.83 | 1.34 | 1.80 |
| Ta        | 0.21                    | 0.23 | 0.36 | 0.11 | 0.13 | 0.23 | 0.25 | 0.22 | 0.21 | 0.10 | 0.23 | 0.22 | 0.30 | 0.21 | 0.20 | 0.17 |

Table S3: Continued

| Location                            |                         |      |      |      |          |      |      |      |      |      |      |      |          |      |      | 1        |
|-------------------------------------|-------------------------|------|------|------|----------|------|------|------|------|------|------|------|----------|------|------|----------|
| Sample                              | TD19                    | TD20 | TD21 | TD23 | TD24     | TD25 | TD26 | TD27 | TD28 | TD30 | TD31 | TD32 | TD33     | TD34 | TD35 | TD36     |
| Rock type                           | Sub alkaline mafic rock |      |      |      |          |      |      |      |      |      |      |      |          |      |      |          |
| Reference                           | Sun, 2009               |      |      |      |          |      |      |      |      |      |      |      |          |      |      |          |
| Age(Ma)                             |                         |      |      |      |          |      |      |      |      |      |      |      |          |      |      |          |
| Pb                                  | 5.81                    | 5.58 | 8.41 | 4.37 | 3.86     | 4.29 | 5.17 | 7.60 | 5.49 | 4.52 | 4.43 | 4.59 | 4.47     | 19.8 | 2.66 | 3.81     |
| Th                                  | 0.16                    | 0.24 | 2.38 | 0.15 | 0.48     | 0.17 | 0.34 | 1.85 | 0.18 | 0.17 | 0.26 | 0.25 | 0.23     | 0.62 | 0.43 | 0.50     |
| U                                   | 0.08                    | 0.10 | 0.57 | 0.07 | 0.14     | 0.13 | 0.19 | 0.37 | 0.10 | 0.12 | 0.16 | 0.15 | 0.12     | 0.36 | 0.17 | 0.24     |
| Isotopic date                       |                         |      |      |      |          |      |      |      |      |      |      |      |          |      |      |          |
| $^{87}\text{Sr}/^{86}\text{Sr}$ (t) |                         |      |      |      | 0.702822 |      |      |      |      |      |      |      | 0.705165 |      |      | 0.705053 |
| $\epsilon_{\text{Nd}}$ (t)          |                         |      |      |      | 1.23     |      |      |      |      |      |      |      | 0.95     |      |      | 1.19     |
| Ratio                               |                         |      |      |      |          |      |      |      |      |      |      |      |          |      |      |          |
| Mg#                                 | 53.9                    | 52.7 | 55.2 | 65.0 | 68.6     | 41.1 | 48.4 | 65.9 | 58.1 | 66.5 | 59.4 | 61.2 | 56.6     | 55.7 | 54.3 | 58.1     |
| Sr/Y                                | 96.5                    | 110  | 80.4 | 69.1 | 76.2     | 94.7 | 91.5 | 56.3 | 85.5 | 57.2 | 94.4 | 72.2 | 54.4     | 94.2 | 57.8 | 61.4     |
| Nb/La                               | 0.30                    | 0.30 | 0.32 | 0.24 | 0.20     | 0.53 | 0.32 | 0.27 | 0.33 | 0.19 | 0.30 | 0.33 | 0.43     | 0.26 | 0.29 | 0.20     |
| Nb/U                                | 54.3                    | 44.4 | 9.11 | 28.1 | 15.0     | 47.0 | 25.5 | 8.03 | 39.7 | 15.9 | 25.3 | 29.9 | 46.4     | 9.86 | 17.6 | 11.6     |

| Location                         | Longitude intrusion |       |       |        |       |       |       |       |       |       |       |       |       |        |       |        |  |
|----------------------------------|---------------------|-------|-------|--------|-------|-------|-------|-------|-------|-------|-------|-------|-------|--------|-------|--------|--|
| Sample                           | TD38                | TD39  | TD40  | TD41   | TD42  | TD43  | TD43- | TD44  | TD45  | TD46  | TD47  | TD48  | TD49  | TD50   | Gj524 | Gj1680 |  |
| Rock type                        |                     |       |       |        |       |       |       |       |       |       |       |       |       |        |       |        |  |
| Reference                        |                     |       |       |        |       |       |       |       |       |       |       |       |       |        |       |        |  |
| Age(Ma)                          |                     |       |       |        |       |       |       |       |       |       |       |       |       |        |       |        |  |
| Major(wt.%)                      |                     |       |       |        |       |       |       |       |       |       |       |       |       |        |       |        |  |
| SiO <sub>2</sub>                 | 47.30               | 49.30 | 50.00 | 54.40  | 49.10 | 50.60 | 57.00 | 53.70 | 56.90 | 57.80 | 58.20 | 53.00 | 53.70 | 53.30  | 56.58 | 58.47  |  |
| TiO <sub>2</sub>                 | 1.84                | 1.54  | 1.31  | 1.53   | 1.29  | 1.26  | 0.99  | 1.41  | 0.91  | 0.90  | 0.89  | 1.13  | 1.13  | 1.23   | 1.01  | 0.95   |  |
| Al <sub>2</sub> O <sub>3</sub>   | 16.70               | 19.80 | 20.30 | 21.00  | 19.20 | 18.40 | 17.70 | 16.00 | 17.30 | 17.90 | 18.10 | 18.40 | 18.80 | 18.20  | 16.62 | 17.05  |  |
| Fe <sub>2</sub> O <sub>3</sub> T | 13.40               | 9.18  | 9.02  | 10.12  | 9.72  | 9.16  | 7.09  | 9.67  | 6.28  | 6.08  | 5.64  | 7.91  | 7.75  | 8.40   | 7.19  | 6.97   |  |
| Fe <sub>2</sub> O <sub>3</sub>   |                     |       |       |        |       |       |       |       |       |       |       |       |       |        |       |        |  |
| FeO                              |                     |       |       |        |       |       |       |       |       |       |       |       |       |        |       |        |  |
| MnO                              | 0.22                | 0.16  | 0.16  | 0.16   | 0.15  | 0.16  | 0.12  | 0.17  | 0.11  | 0.10  | 0.10  | 0.13  | 0.14  | 0.15   | 0.13  | 0.18   |  |
| MgO                              | 6.80                | 4.71  | 4.89  | 5.32   | 5.44  | 5.53  | 3.29  | 4.62  | 2.99  | 2.80  | 2.96  | 4.18  | 4.05  | 4.83   | 3.72  | 3.43   |  |
| CaO                              | 8.86                | 8.52  | 8.29  | 9.90   | 9.65  | 6.49  | 6.56  | 6.33  | 5.87  | 6.53  | 6.18  | 7.30  | 6.12  | 6.59   | 6.29  | 5.42   |  |
| Na <sub>2</sub> O                | 2.57                | 4.03  | 4.15  | 3.79   | 3.68  | 4.38  | 4.05  | 3.50  | 4.13  | 4.10  | 4.44  | 4.16  | 4.76  | 3.86   | 3.77  | 4.09   |  |
| K <sub>2</sub> O                 | 0.15                | 0.42  | 0.31  | 0.29   | 0.37  | 0.84  | 1.17  | 0.99  | 1.45  | 1.28  | 1.25  | 0.77  | 0.96  | 1.02   | 1.60  | 1.07   |  |
| P <sub>2</sub> O <sub>5</sub>    | 0.57                | 0.48  | 0.37  | 0.42   | 0.29  | 0.33  | 0.28  | 0.39  | 0.25  | 0.23  | 0.23  | 0.29  | 0.30  | 0.36   | 0.28  | 0.28   |  |
| LOI                              | 1.60                | 1.54  | 0.95  | 1.09   | 0.94  | 2.67  | 1.44  | 2.43  | 2.62  | 1.86  | 1.91  | 1.73  | 1.98  | 2.05   | 1.50  | 1.47   |  |
| TOL                              | 100.00              | 99.70 | 99.80 | 108.00 | 99.90 | 99.90 | 99.60 | 99.20 | 98.90 | 99.60 | 99.90 | 99.10 | 99.70 | 100.00 | 98.69 | 99.38  |  |
| Trace(ppm)                       |                     |       |       |        |       |       |       |       |       |       |       |       |       |        |       |        |  |
| Li                               |                     |       |       |        |       |       |       |       |       |       |       |       |       |        |       |        |  |
| Be                               |                     |       |       |        |       |       |       |       |       |       |       |       |       |        |       |        |  |
| Sc                               | 18.9                | 19.0  | 20.3  | 30.7   | 23.0  | 20.8  | 16.1  | 18.1  | 14.9  | 13.1  | 10.9  | 15.7  | 14.7  | 17.3   | 16.5  | 10.8   |  |
| V                                | 253                 | 176   | 185   | 253    | 200   | 170   | 131   | 175   | 101   | 95.0  | 99.0  | 138   | 119   | 151    | 142   | 117    |  |
| Cr                               | 88.0                | 78.0  | 60.7  | 77.0   | 50.7  | 72.1  | 50.2  | 73.1  | 35.0  | 38.8  | 45.5  | 67.4  | 47.8  | 72.0   | 83.1  | 60.0   |  |
| Co                               | 32.3                | 24.1  | 25.6  | 28.9   | 26.8  | 26.6  | 19.6  | 22.9  | 15.0  | 14.6  | 14.5  | 19.8  | 18.2  | 22.2   | 20.3  | 19.2   |  |
| Ni                               | 18.8                | 17.6  | 15.6  | 15.3   | 15.4  | 16.5  | 21.5  | 19.6  | 10.8  | 12.5  | 23.2  | 15.1  | 13.0  | 26.1   | 24.8  | 24.7   |  |
| Cu                               |                     |       |       |        |       |       |       |       |       |       |       |       |       |        |       |        |  |
| Zn                               |                     |       |       |        |       |       |       |       |       |       |       |       |       |        |       |        |  |

**Table S3: Continued**

| Location  | Longde intrusion |      |      |      |      |      |       |      |      |      |      |      |      |      |       |        |
|-----------|------------------|------|------|------|------|------|-------|------|------|------|------|------|------|------|-------|--------|
| Sample    | TD38             | TD39 | TD40 | TD41 | TD42 | TD43 | TD43- | TD44 | TD45 | TD46 | TD47 | TD48 | TD49 | TD50 | Gj524 | Gj1680 |
| Rock type |                  |      |      |      |      |      |       |      |      |      |      |      |      |      |       |        |
| Reference |                  |      |      |      |      |      |       |      |      |      |      |      |      |      |       |        |
| Age(Ma)   |                  |      |      |      |      |      |       |      |      |      |      |      |      |      |       |        |
| Ga        |                  |      |      |      |      |      |       |      |      |      |      |      |      |      |       |        |
| Ge        |                  |      |      |      |      |      |       |      |      |      |      |      |      |      |       |        |
| Rb        | 1.31             | 5.57 | 2.69 | 2.86 | 2.66 | 13.3 | 22.3  | 18.5 | 26.8 | 21.2 | 21.1 | 9.85 | 13.2 | 16.2 | 43.0  | 24.0   |
| Sr        | 799              | 1100 | 987  | 951  | 955  | 938  | 818   | 659  | 686  | 767  | 787  | 866  | 782  | 718  | 735   | 782    |
| Y         | 11.1             | 12.6 | 11.8 | 16.9 | 14.7 | 7.78 | 12.4  | 14.0 | 11.2 | 9.30 | 8.49 | 9.69 | 9.88 | 10.4 | 20.0  | 19.0   |
| Zr        | 123              | 78.6 | 120  | 56.8 | 163  | 20.8 | 108   | 111  | 87.5 | 104  | 117  | 91.9 | 140  | 97.3 | 130   | 145    |
| Nb        | 4.39             | 4.80 | 4.63 | 3.93 | 4.92 | 3.34 | 4.60  | 5.78 | 4.43 | 4.15 | 4.08 | 4.64 | 4.33 | 4.89 | 4.60  | 6.50   |
| Sn        |                  |      |      |      |      |      |       |      |      |      |      |      |      |      |       |        |
| Cs        | 0.09             | 0.16 | 0.24 | 0.12 | 0.17 | 0.35 | 0.94  | 0.49 | 0.58 | 0.55 | 0.29 | 0.56 | 0.52 | 0.46 |       |        |
| Ba        | 245              | 341  | 425  | 371  | 414  | 537  | 788   | 479  | 730  | 831  | 543  | 529  | 380  | 496  | 989   | 714    |
| La        | 11.8             | 13.6 | 12.8 | 12.5 | 13.7 | 9.50 | 16.5  | 19.3 | 25.3 | 17.2 | 21.4 | 15.3 | 14.6 | 14.4 | 15.1  | 14.8   |
| Ce        | 28.7             | 32.0 | 30.1 | 33.3 | 33.6 | 20.9 | 36.4  | 44.0 | 49.6 | 35.3 | 42.4 | 33.0 | 31.6 | 31.9 | 35.9  | 43.7   |
| Pr        | 4.12             | 4.52 | 4.14 | 4.95 | 4.75 | 2.83 | 4.68  | 5.68 | 5.68 | 4.30 | 4.84 | 4.26 | 4.17 | 4.16 | 4.60  | 4.30   |
| Nd        | 19.3             | 20.7 | 18.9 | 23.0 | 21.7 | 13.0 | 19.9  | 24.4 | 22.3 | 18.0 | 18.7 | 18.0 | 18.1 | 18.4 | 18.9  | 17.7   |
| Sm        | 4.11             | 4.36 | 4.01 | 5.19 | 4.61 | 2.83 | 4.08  | 4.92 | 4.02 | 3.37 | 3.21 | 3.48 | 3.78 | 3.61 | 4.10  | 3.40   |
| Eu        | 1.58             | 1.73 | 1.73 | 2.11 | 1.83 | 1.42 | 1.64  | 1.72 | 1.55 | 1.49 | 1.42 | 1.62 | 1.66 | 1.69 | 1.70  | 1.40   |
| Gd        | 3.41             | 3.78 | 3.27 | 4.54 | 3.86 | 2.44 | 3.30  | 3.84 | 3.28 | 2.73 | 2.50 | 2.92 | 3.10 | 2.99 | 3.60  | 3.10   |
| Tb        | 0.46             | 0.49 | 0.45 | 0.63 | 0.55 | 0.32 | 0.47  | 0.56 | 0.45 | 0.38 | 0.34 | 0.41 | 0.42 | 0.44 | 0.40  | 0.40   |
| Dy        | 2.33             | 2.53 | 2.36 | 3.28 | 2.82 | 1.63 | 2.44  | 2.75 | 2.34 | 1.93 | 1.75 | 2.03 | 2.14 | 2.20 | 2.30  | 1.90   |
| Ho        | 0.42             | 0.46 | 0.42 | 0.58 | 0.52 | 0.30 | 0.45  | 0.52 | 0.42 | 0.35 | 0.32 | 0.37 | 0.39 | 0.41 | 0.40  | 0.30   |
| Er        | 1.14             | 1.30 | 1.17 | 1.69 | 1.46 | 0.79 | 1.29  | 1.52 | 1.18 | 1.03 | 0.94 | 1.07 | 1.13 | 1.14 | 1.20  | 0.90   |
| Tm        | 0.14             | 0.16 | 0.14 | 0.23 | 0.19 | 0.10 | 0.17  | 0.21 | 0.16 | 0.13 | 0.13 | 0.14 | 0.13 | 0.14 | 0.20  | 0.10   |
| Yb        | 0.93             | 1.03 | 0.92 | 1.36 | 1.24 | 0.59 | 1.14  | 1.35 | 1.06 | 0.88 | 0.79 | 0.88 | 0.91 | 0.96 | 1.10  | 0.80   |
| Lu        | 0.13             | 0.15 | 0.13 | 0.20 | 0.17 | 0.10 | 0.16  | 0.19 | 0.15 | 0.13 | 0.12 | 0.13 | 0.13 | 0.14 | 0.20  | 0.10   |
| Hf        | 2.72             | 1.80 | 2.63 | 1.83 | 3.47 | 0.57 | 2.69  | 2.85 | 2.49 | 2.68 | 2.92 | 2.44 | 3.34 | 2.55 | 0.50  | 0.80   |
| Ta        | 0.30             | 0.24 | 0.22 | 0.17 | 0.21 | 0.32 | 0.28  | 0.33 | 0.26 | 0.25 | 0.31 | 0.24 | 0.23 | 0.27 | 0.20  | 0.30   |



Table S3: Continued

| Location                               | ongde intrusion |      |      |      |      |      |       |      |      |      |      |      |      |          |       |        |
|----------------------------------------|-----------------|------|------|------|------|------|-------|------|------|------|------|------|------|----------|-------|--------|
| Sample                                 | TD38            | TD39 | TD40 | TD41 | TD42 | TD43 | TD43- | TD44 | TD45 | TD46 | TD47 | TD48 | TD49 | TD50     | Gj524 | Gj1680 |
| Rock type                              |                 |      |      |      |      |      |       |      |      |      |      |      |      |          |       |        |
| Reference                              |                 |      |      |      |      |      |       |      |      |      |      |      |      |          |       |        |
| Age(Ma)                                |                 |      |      |      |      |      |       |      |      |      |      |      |      |          |       |        |
| Pb                                     | 8.51            | 3.07 | 4.74 | 6.02 | 3.84 | 1.97 | 10.4  | 7.15 | 9.80 | 22.4 | 11.4 | 7.32 | 7.84 | 4.81     | 14.3  | 9.20   |
| Th                                     | 0.17            | 0.38 | 0.34 | 0.23 | 0.41 | 0.32 | 2.08  | 1.60 | 6.02 | 2.47 | 2.55 | 1.31 | 1.01 | 0.90     | 1.70  | 0.60   |
| U                                      | 0.11            | 0.18 | 0.15 | 0.26 | 0.35 | 0.40 | 0.76  | 0.90 | 1.07 | 0.98 | 0.84 | 0.55 | 0.43 | 0.36     | 0.70  | 0.20   |
| Isotopic date                          |                 |      |      |      |      |      |       |      |      |      |      |      |      |          |       |        |
| <sup>87</sup> Sr/ <sup>86</sup> Sr (t) |                 |      |      |      |      |      |       |      |      |      |      |      |      | 0.705120 |       |        |
| εNd (t)                                |                 |      |      |      |      |      |       |      |      |      |      |      |      | 1.47     |       |        |
| Ratio                                  |                 |      |      |      |      |      |       |      |      |      |      |      |      |          |       |        |
| Mg#                                    | 54.2            | 54.5 | 55.8 | 55.1 | 56.6 | 58.5 | 52.0  | 52.7 | 52.6 | 51.8 | 55.0 | 55.2 | 54.9 | 57.3     | 54.7  | 53.4   |
| Sr/Y                                   | 72.3            | 86.9 | 83.8 | 56.3 | 65.0 | 121  | 66.0  | 47.0 | 61.1 | 82.5 | 92.7 | 89.4 | 79.1 | 69.0     | 36.8  | 41.2   |
| Nb/La                                  | 0.37            | 0.35 | 0.36 | 0.31 | 0.36 | 0.35 | 0.28  | 0.30 | 0.18 | 0.24 | 0.19 | 0.30 | 0.30 | 0.34     | 0.30  | 0.44   |
| Nb/U                                   | 39.9            | 26.7 | 30.9 | 15.1 | 14.1 | 8.35 | 6.05  | 6.42 | 4.14 | 4.23 | 4.86 | 8.44 | 10.1 | 13.6     | 6.57  | 32.5   |

**Table S3: Continued**

[illegible]

Table S3: Continued

| Location  |                         |        |        |        |       |        |        |        |        |        |        |        |         |        |        |        |
|-----------|-------------------------|--------|--------|--------|-------|--------|--------|--------|--------|--------|--------|--------|---------|--------|--------|--------|
| Sample    | Gj1686                  | Gj1692 | Gj1693 | Gj2497 | Gj424 | Gj1683 | Gj1684 | Gj1685 | Gj1691 | Gj2415 | Gj2419 | Gj2458 | Gj2481A | Gj2488 | Gj1681 | Gj1682 |
| Rock type | Sub alkaline mafic rock |        |        |        |       |        |        |        |        |        |        |        |         |        |        |        |
| Reference | Munteanu et al., 2010   |        |        |        |       |        |        |        |        |        |        |        |         |        |        |        |
| Age(Ma)   |                         |        |        |        |       |        |        |        |        |        |        |        |         |        |        |        |
| Ga        |                         |        |        |        |       |        |        |        |        |        |        |        |         |        |        |        |
| Ge        |                         |        |        |        |       |        |        |        |        |        |        |        |         |        |        |        |
| Rb        | 31.0                    | 29.0   | 25.0   | 31.0   | 8.00  | 7.00   | 11.0   | 9.00   | 18.0   | 8.00   | 9.00   | 7.00   | 14.0    | 11.0   | 6.00   | 6.00   |
| Sr        | 564                     | 561    | 700    | 812    | 951   | 845    | 789    | 753    | 876    | 848    | 797    | 811    | 727     | 820    | 441    | 627    |
| Y         | 19.0                    | 20.0   | 20.0   | 17.0   | 11.0  | 21.0   | 17.0   | 17.0   | 18.0   | 19.0   | 22.0   | 16.0   | 22.0    | 13.0   | 27.0   | 19.0   |
| Zr        | 164                     | 178    | 202    | 136    | 52.0  | 141    | 149    | 91.0   | 85.0   | 41.0   | 34.0   | 45.0   | 77.0    | 183    | 59.0   | 77.0   |
| Nb        | 5.50                    | 5.60   | 7.00   | 4.30   | 4.00  | 5.20   | 5.10   | 3.90   | 4.50   | 5.20   | 3.20   | 6.00   | 4.30    | 4.60   | 3.40   | 2.70   |
| Sn        |                         |        |        |        |       |        |        |        |        |        |        |        |         |        |        |        |
| Cs        |                         |        |        |        |       |        |        |        |        |        |        |        |         |        |        |        |
| Ba        | 641                     | 1300   | 1110   | 894    | 419   | 514    | 379    | 448    | 575    | 376    | 378    | 247    | 219     | 622    | 451    | 601    |
| La        | 15.4                    | 15.5   | 18.5   | 15.6   | 10.3  | 13.2   | 12.0   | 10.8   | 12.6   | 12.5   | 11.1   |        | 10.0    | 14.5   | 9.90   | 10.1   |
| Ce        | 43.7                    | 38.2   | 50.1   | 36.0   | 23.8  | 37.4   | 36.1   | 30.0   | 33.4   | 30.7   | 30.3   |        | 23.5    | 30.0   | 34.1   | 24.8   |
| Pr        | 4.40                    | 4.70   | 5.10   | 4.60   | 3.20  | 4.30   | 3.50   | 3.10   | 3.80   | 4.30   | 4.40   |        | 3.10    | 3.40   | 4.90   | 3.10   |
| Nd        | 18.3                    | 19.5   | 21.0   | 19.1   | 14.3  | 18.9   | 14.4   | 13.1   | 16.3   | 19.3   | 19.4   |        | 13.6    | 13.0   | 21.9   | 13.3   |
| Sm        | 3.80                    | 4.20   | 4.30   | 4.00   | 3.10  | 4.10   | 2.90   | 2.80   | 3.50   | 4.00   | 4.10   |        | 3.10    | 2.40   | 4.80   | 2.90   |
| Eu        | 1.50                    | 1.70   | 1.70   | 1.70   | 1.60  | 1.70   | 1.30   | 1.40   | 1.60   | 1.80   | 1.70   |        | 1.90    | 1.40   | 1.70   | 1.30   |
| Gd        | 3.30                    | 3.50   | 3.80   | 3.20   | 2.90  | 3.60   | 2.70   | 2.50   | 3.10   | 3.50   | 3.60   |        | 3.20    | 2.00   | 4.20   | 2.50   |
| Tb        | 0.40                    | 0.40   | 0.50   | 0.40   | 0.40  | 0.50   | 0.30   | 0.30   | 0.40   | 0.40   | 0.50   |        | 0.50    | 0.20   | 0.60   | 0.30   |
| Dy        | 2.10                    | 2.30   | 2.40   | 2.10   | 1.80  | 2.40   | 1.70   | 1.60   | 2.10   | 2.20   | 2.50   |        | 2.70    | 1.10   | 3.30   | 1.90   |
| Ho        | 0.40                    | 0.40   | 0.40   | 0.40   | 0.30  | 0.40   | 0.30   | 0.30   | 0.40   | 0.40   | 0.50   |        | 0.60    | 0.20   | 0.60   | 0.40   |
| Er        | 1.10                    | 1.10   | 1.20   | 1.00   | 0.90  | 1.20   | 0.80   | 0.80   | 1.00   | 1.00   | 1.30   |        | 1.50    | 0.60   | 1.70   | 1.00   |
| Tm        | 0.10                    | 0.20   | 0.20   | 0.10   | 0.10  | 0.20   | 0.10   | 0.10   | 0.10   | 0.10   | 0.20   |        | 0.20    | 0.10   | 0.20   | 0.20   |
| Yb        | 0.90                    | 0.90   | 1.00   | 0.90   | 0.70  | 0.90   | 0.70   | 0.60   | 0.80   | 0.80   | 1.10   |        | 1.30    | 0.50   | 1.50   | 1.00   |
| Lu        | 0.10                    | 0.10   | 0.10   | 0.10   | 0.10  | 0.10   | 0.10   | 0.10   | 0.10   | 0.10   | 0.20   |        | 0.20    | 0.10   | 0.20   | 0.20   |
| Hf        | 0.80                    | 1.30   | 0.90   | 0.80   | 0.50  | 0.90   | 0.80   | 0.90   | 0.70   | 0.50   | 1.10   |        | 0.60    | 1.30   | 1.40   | 1.20   |
| Ta        | 0.30                    | 0.30   | 0.30   | 0.20   | 0.20  | 0.20   | 0.20   | 0.20   | 0.20   | 0.20   | 0.10   |        | 0.20    | 0.30   | 0.10   | 0.10   |

**Table S3: Continued**

| Location                               |                         |        |        |        |       |        |        |        |        |        |        |        |         |        |        |        |
|----------------------------------------|-------------------------|--------|--------|--------|-------|--------|--------|--------|--------|--------|--------|--------|---------|--------|--------|--------|
| Sample                                 | Gj1686                  | Gj1692 | Gj1693 | Gj2497 | Gj424 | Gj1683 | Gj1684 | Gj1685 | Gj1691 | Gj2415 | Gj2419 | Gj2458 | Gj2481A | Gj2488 | Gj1681 | Gj1682 |
| Rock type                              | Sub alkaline mafic rock |        |        |        |       |        |        |        |        |        |        |        |         |        |        |        |
| Reference                              | Munteanu et al., 2010   |        |        |        |       |        |        |        |        |        |        |        |         |        |        |        |
| Age(Ma)                                |                         |        |        |        |       |        |        |        |        |        |        |        |         |        |        |        |
| Pb                                     | 9.40                    | 9.40   | 20.1   | 10.8   | 3.90  | 6.50   | 8.10   | 7.30   | 6.80   | 2.60   | 3.00   |        | 5.60    | 6.70   | 3.30   | 5.30   |
| Th                                     | 2.70                    | 1.20   | 1.10   | 1.30   | 0.20  | 0.30   | 0.70   | 0.70   | 1.00   |        | 0.10   |        | 0.40    | 0.50   | 0.10   | 0.20   |
| U                                      | 1.20                    | 0.30   | 0.30   | 0.50   | 0.10  | 0.10   | 0.30   | 0.30   | 0.30   |        |        |        | 0.10    | 0.20   |        | 0.10   |
| Isotopic date                          |                         |        |        |        |       |        |        |        |        |        |        |        |         |        |        |        |
| <sup>87</sup> Sr/ <sup>86</sup> Sr (t) |                         |        |        |        |       |        |        |        |        |        |        |        |         |        |        |        |
| εNd (t)                                |                         |        |        |        |       |        |        |        |        |        |        |        |         |        |        |        |
| Ratio                                  |                         |        |        |        |       |        |        |        |        |        |        |        |         |        |        |        |
| Mg#                                    | 56.7                    | 54.8   | 53.1   | 52.9   | 56.9  | 55.9   | 54.4   | 58.7   | 56.8   | 56.1   | 58.4   | 63.9   | 55.8    | 44.9   | 67.5   | 66.7   |
| Sr/Y                                   | 29.7                    | 28.1   | 35.0   | 47.8   | 86.5  | 40.2   | 46.4   | 44.3   | 48.7   | 44.6   | 36.2   | 50.7   | 33.0    | 63.1   | 16.3   | 33.0   |
| Nb/La                                  | 0.36                    | 0.36   | 0.38   | 0.28   | 0.39  | 0.39   | 0.43   | 0.36   | 0.36   | 0.42   | 0.29   |        | 0.43    | 0.32   | 0.34   | 0.27   |
| Nb/U                                   | 4.58                    | 18.7   | 23.3   | 8.60   | 40.0  | 52.0   | 17.0   | 13.0   | 15.0   |        |        |        | 43.0    | 23.0   |        | 27.0   |

**Table S3:**

| Location                         | Dadukou intrusion       |        |        |        |        |        |        |        |        |        |        |         |         |        |        |        |
|----------------------------------|-------------------------|--------|--------|--------|--------|--------|--------|--------|--------|--------|--------|---------|---------|--------|--------|--------|
| Sample                           | DDK-10                  | DDK-11 | DDK-12 | DDK-15 | DDK-16 | DDK-17 | DDK-18 | DDK-19 | DDK-20 | DDK-21 | DDK-22 | DDK-23A | DDK-23B | DDK-24 | DDK-26 | DDK-28 |
| Rock type                        | Sub alkaline mafic rock |        |        |        |        |        |        |        |        |        |        |         |         |        |        |        |
| Reference                        | Zhao and Zhou, 2007     |        |        |        |        |        |        |        |        |        |        |         |         |        |        |        |
| Age(Ma)                          | 745                     |        |        |        |        |        |        |        |        |        |        |         |         |        |        |        |
| Major(wt.%)                      |                         |        |        |        |        |        |        |        |        |        |        |         |         |        |        |        |
| SiO <sub>2</sub>                 | 50.63                   | 49.82  | 48.88  | 49.06  | 48.19  | 48.67  | 48.74  | 49.90  | 49.36  | 49.38  | 48.01  | 50.90   | 47.97   | 48.90  | 49.02  | 49.46  |
| TiO <sub>2</sub>                 | 1.40                    | 1.03   | 1.07   | 0.98   | 1.16   | 1.22   | 1.13   | 1.15   | 1.52   | 1.16   | 1.25   | 0.98    | 1.01    | 1.16   | 2.33   | 1.75   |
| Al <sub>2</sub> O <sub>3</sub>   | 15.56                   | 15.77  | 17.08  | 15.65  | 16.17  | 16.22  | 15.98  | 15.57  | 15.94  | 16.20  | 16.95  | 15.58   | 16.33   | 16.14  | 14.73  | 15.21  |
| Fe <sub>2</sub> O <sub>3</sub> T | 13.83                   | 12.44  | 11.24  | 11.74  | 12.49  | 12.05  | 12.21  | 12.27  | 14.09  | 12.16  | 12.73  | 12.05   | 11.60   | 12.02  | 16.78  | 15.09  |
| Fe <sub>2</sub> O <sub>3</sub>   |                         |        |        |        |        |        |        |        |        |        |        |         |         |        |        |        |
| FeO                              |                         |        |        |        |        |        |        |        |        |        |        |         |         |        |        |        |
| MnO                              | 0.25                    | 0.21   | 0.17   | 0.19   | 0.20   | 0.19   | 0.20   | 0.21   | 0.24   | 0.20   | 0.21   | 0.21    | 0.18    | 0.19   | 0.27   | 0.24   |
| MgO                              | 4.82                    | 6.36   | 6.24   | 6.56   | 7.21   | 6.99   | 6.87   | 6.92   | 5.56   | 6.60   | 7.07   | 6.20    | 7.70    | 6.84   | 4.40   | 4.62   |
| CaO                              | 9.28                    | 10.25  | 11.37  | 11.11  | 10.51  | 10.96  | 10.84  | 10.59  | 9.95   | 10.67  | 10.30  | 9.94    | 11.01   | 10.76  | 9.17   | 9.07   |
| Na <sub>2</sub> O                | 3.62                    | 3.01   | 3.16   | 2.79   | 2.76   | 2.91   | 3.05   | 2.89   | 3.08   | 2.90   | 2.95   | 3.01    | 2.63    | 2.81   | 3.09   | 3.29   |
| K <sub>2</sub> O                 | 0.42                    | 0.37   | 0.30   | 0.33   | 0.37   | 0.29   | 0.26   | 0.27   | 0.25   | 0.27   | 0.34   | 0.31    | 0.35    | 0.29   | 0.33   | 0.42   |
| P <sub>2</sub> O <sub>5</sub>    | 0.28                    | 0.16   | 0.16   | 0.15   | 0.19   | 0.20   | 0.20   | 0.16   | 0.27   | 0.20   | 0.17   | 0.15    | 0.18    | 0.18   | 0.41   | 0.31   |
| LOI                              | 0.49                    | 0.54   | 1.30   | 0.60   | 0.58   | 0.59   | 0.41   | 0.45   | -0.09  | 0.32   | 0.54   | 0.52    | 0.57    | 0.49   | -0.10  | 0.20   |
| TOL                              | 100.58                  | 99.97  | 100.97 | 99.16  | 99.82  | 100.29 | 99.91  | 100.40 | 100.15 | 100.06 | 100.53 | 99.87   | 99.54   | 99.79  | 100.42 | 99.65  |
| Trace(ppm)                       |                         |        |        |        |        |        |        |        |        |        |        |         |         |        |        |        |
| Li                               |                         |        |        |        |        |        |        |        |        |        |        |         |         |        |        |        |
| Be                               |                         |        |        |        |        |        |        |        |        |        |        |         |         |        |        |        |
| Sc                               | 39.7                    | 37.9   | 37.3   | 36.0   | 35.6   | 37.5   | 36.6   | 37.8   | 41.3   | 38.4   | 38.8   | 36.8    | 33.1    | 35.9   | 38.5   | 38.6   |
| V                                | 280                     | 262    | 267    | 251    | 252    | 270    | 252    | 279    | 321    | 265    | 278    | 257     | 221     | 240    | 312    | 293    |
| Cr                               | 19.3                    | 53.5   | 136    | 166    | 129    | 126    | 129    | 132    | 23.9   | 112    | 191    | 53.5    | 236     | 135    | 27.5   | 125    |
| Co                               | 33.9                    | 38.0   | 34.5   | 36.1   | 41.1   | 40.6   | 39.5   | 40.4   | 40.0   | 43.0   | 40.8   | 38.0    | 41.8    | 38.7   | 34.9   | 36.8   |
| Ni                               | 4.99                    | 10.3   | 15.4   | 17.7   | 21.8   | 20.7   | 23.0   | 23.9   | 7.69   | 22.2   | 28.6   | 10.1    | 39.1    | 26.4   | 12.5   | 36.5   |
| Cu                               |                         |        |        |        |        |        |        |        |        |        |        |         |         |        |        |        |
| Zn                               |                         |        |        |        |        |        |        |        |        |        |        |         |         |        |        |        |

Table S3:

| Location                |        |        |        |        |        |        |        |        |        |        |        |         |         |        |        |        |
|-------------------------|--------|--------|--------|--------|--------|--------|--------|--------|--------|--------|--------|---------|---------|--------|--------|--------|
| Dadukou intrusion       |        |        |        |        |        |        |        |        |        |        |        |         |         |        |        |        |
| Sample                  | DDK-10 | DDK-11 | DDK-12 | DDK-15 | DDK-16 | DDK-17 | DDK-18 | DDK-19 | DDK-20 | DDK-21 | DDK-22 | DDK-23A | DDK-23B | DDK-24 | DDK-26 | DDK-28 |
| Rock type               |        |        |        |        |        |        |        |        |        |        |        |         |         |        |        |        |
| Sub alkaline mafic rock |        |        |        |        |        |        |        |        |        |        |        |         |         |        |        |        |
| Reference               |        |        |        |        |        |        |        |        |        |        |        |         |         |        |        |        |
| Zhao and Zhou, 2007     |        |        |        |        |        |        |        |        |        |        |        |         |         |        |        |        |
| Age(Ma)                 | 745    |        |        |        |        |        |        |        |        |        |        |         |         |        |        |        |
| Ga                      |        |        |        |        |        |        |        |        |        |        |        |         |         |        |        |        |
| Ge                      |        |        |        |        |        |        |        |        |        |        |        |         |         |        |        |        |
| Rb                      | 2.01   | 2.44   | 0.96   | 1.16   | 1.68   | 0.90   | 0.91   | 0.84   | 1.32   | 0.80   | 1.45   | 1.62    | 1.52    | 1.31   | 1.88   | 2.56   |
| Sr                      | 364    | 337    | 347    | 331    | 328    | 345    | 350    | 333    | 393    | 341    | 319    | 343     | 352     | 350    | 335    | 332    |
| Y                       | 25.9   | 21.2   | 22.3   | 20.6   | 21.8   | 22.5   | 21.5   | 24.8   | 31.7   | 26.5   | 25.7   | 20.9    | 19.6    | 24.0   | 37.3   | 38.8   |
| Zr                      | 136    | 58.0   | 65.0   | 58.0   | 72.0   | 61.0   | 65.0   | 39.0   | 73.0   | 84.0   | 67.0   | 55.0    | 66.0    | 51.0   | 108    | 83.0   |
| Nb                      | 5.59   | 2.95   | 3.85   | 2.76   | 2.94   | 2.95   | 2.86   | 4.27   | 5.96   | 3.52   | 3.70   | 2.83    | 2.57    | 3.47   | 8.30   | 5.99   |
| Sn                      |        |        |        |        |        |        |        |        |        |        |        |         |         |        |        |        |
| Cs                      | 0.04   | 0.05   | 0.05   | 0.02   | 0.02   | 0.02   | 0.01   | 0.02   | 0.04   | 0.02   | 0.03   | 0.03    | 0.01    | 0.04   | 0.08   | 0.05   |
| Ba                      | 355    | 262    | 177    | 177    | 228    | 215    | 220    | 267    | 274    | 237    | 241    | 268     | 210     | 242    | 435    | 503    |
| La                      | 16.6   | 10.9   | 10.4   | 10.2   | 9.20   | 9.50   | 9.90   | 13.4   | 14.2   | 11.4   | 11.2   | 10.2    | 7.94    | 12.3   | 20.0   | 19.2   |
| Ce                      | 34.2   | 24.7   | 25.0   | 23.6   | 22.3   | 22.9   | 22.8   | 31.0   | 32.9   | 26.5   | 26.8   | 22.8    | 19.3    | 28.6   | 46.6   | 45.1   |
| Pr                      | 4.43   | 3.26   | 3.38   | 3.16   | 3.09   | 3.14   | 3.14   | 4.21   | 4.61   | 3.67   | 3.68   | 3.05    | 2.69    | 3.88   | 6.47   | 6.39   |
| Nd                      | 19.8   | 14.3   | 14.8   | 14.0   | 14.2   | 14.5   | 14.3   | 18.3   | 21.2   | 16.4   | 16.8   | 13.7    | 12.4    | 17.0   | 30.3   | 29.2   |
| Sm                      | 4.68   | 3.57   | 3.72   | 3.35   | 3.64   | 3.68   | 3.65   | 4.35   | 5.34   | 4.12   | 4.09   | 3.35    | 3.19    | 4.13   | 7.30   | 7.26   |
| Eu                      | 1.83   | 1.30   | 1.37   | 1.29   | 1.42   | 1.36   | 1.43   | 1.59   | 1.65   | 1.39   | 1.39   | 1.20    | 1.24    | 1.40   | 2.84   | 2.52   |
| Gd                      | 4.85   | 3.89   | 4.10   | 3.68   | 4.04   | 4.23   | 3.95   | 4.57   | 5.66   | 4.49   | 4.53   | 3.72    | 3.66    | 4.45   | 7.73   | 7.77   |
| Tb                      | 0.82   | 0.65   | 0.68   | 0.62   | 0.66   | 0.68   | 0.64   | 0.73   | 0.91   | 0.73   | 0.71   | 0.61    | 0.60    | 0.73   | 1.21   | 1.27   |
| Dy                      | 4.90   | 3.96   | 4.21   | 3.87   | 4.12   | 4.20   | 4.00   | 4.61   | 5.55   | 4.53   | 4.53   | 3.81    | 3.77    | 4.60   | 7.51   | 7.68   |
| Ho                      | 1.01   | 0.83   | 0.89   | 0.79   | 0.86   | 0.87   | 0.85   | 0.93   | 1.16   | 0.92   | 0.91   | 0.79    | 0.77    | 0.93   | 1.50   | 1.54   |
| Er                      | 3.06   | 2.54   | 2.67   | 2.50   | 2.64   | 2.59   | 2.52   | 2.80   | 3.50   | 2.79   | 2.81   | 2.45    | 2.31    | 2.88   | 4.54   | 4.67   |
| Tm                      | 0.43   | 0.36   | 0.38   | 0.35   | 0.37   | 0.37   | 0.36   | 0.41   | 0.47   | 0.38   | 0.39   | 0.34    | 0.32    | 0.40   | 0.61   | 0.63   |
| Yb                      | 2.75   | 2.38   | 2.59   | 2.35   | 2.39   | 2.33   | 2.23   | 2.62   | 3.00   | 2.55   | 2.51   | 2.30    | 2.09    | 2.62   | 3.93   | 4.02   |
| Lu                      | 0.43   | 0.36   | 0.38   | 0.34   | 0.35   | 0.35   | 0.34   | 0.40   | 0.46   | 0.38   | 0.36   | 0.34    | 0.31    | 0.41   | 0.62   | 0.59   |
| Hf                      | 3.12   | 1.95   | 2.09   | 1.87   | 2.18   | 1.98   | 2.02   | 1.37   | 1.79   | 2.15   | 1.91   | 1.66    | 2.02    | 1.92   | 2.85   | 2.36   |
| Ta                      | 0.29   | 0.19   | 0.20   | 0.16   | 0.17   | 0.18   | 0.19   | 0.26   | 0.32   | 0.18   | 0.32   | 0.17    | 0.16    | 0.21   | 0.46   | 0.34   |

Table S3:

| Location                               |                         |        |        |        |          |        |        |        |        |        |          |         |         |        |        |        |
|----------------------------------------|-------------------------|--------|--------|--------|----------|--------|--------|--------|--------|--------|----------|---------|---------|--------|--------|--------|
| Dadukou intrusion                      |                         |        |        |        |          |        |        |        |        |        |          |         |         |        |        |        |
| Sample                                 | DDK-10                  | DDK-11 | DDK-12 | DDK-15 | DDK-16   | DDK-17 | DDK-18 | DDK-19 | DDK-20 | DDK-21 | DDK-22   | DDK-23A | DDK-23B | DDK-24 | DDK-26 | DDK-28 |
| Rock type                              | Sub alkaline mafic rock |        |        |        |          |        |        |        |        |        |          |         |         |        |        |        |
| Reference                              | Zhao and Zhou, 2007     |        |        |        |          |        |        |        |        |        |          |         |         |        |        |        |
| Age(Ma)                                | 745                     |        |        |        |          |        |        |        |        |        |          |         |         |        |        |        |
| Pb                                     | 4.47                    | 3.08   | 2.19   | 2.49   | 1.74     | 2.11   | 2.16   | 2.56   | 2.57   | 2.13   | 2.69     | 3.08    | 2.03    | 2.33   | 3.89   | 4.42   |
| Th                                     | 0.53                    | 0.39   | 0.40   | 0.28   | 0.22     | 0.16   | 0.13   | 0.24   | 0.65   | 0.69   | 0.67     | 0.70    | 0.48    | 0.56   | 0.63   | 0.41   |
| U                                      | 0.76                    | 0.56   | 1.14   | 0.27   | 1.42     | 0.44   | 0.24   | 0.49   | 1.20   | 1.31   | 1.37     | 1.34    | 1.03    | 0.91   | 0.62   | 0.23   |
| Isotopic date                          |                         |        |        |        |          |        |        |        |        |        |          |         |         |        |        |        |
| <sup>87</sup> Sr/ <sup>86</sup> Sr (t) | 0.707227                |        |        |        | 0.707186 |        |        |        |        |        | 0.706998 |         |         |        |        |        |
| ε <sub>Nd</sub> (t)                    | -0.64                   |        |        |        | -1.73    |        |        |        |        |        | -1.02    |         |         |        |        |        |
| Ratio                                  |                         |        |        |        |          |        |        |        |        |        |          |         |         |        |        |        |
| Mg#                                    | 44.8                    | 54.4   | 56.4   | 56.6   | 57.4     | 57.5   | 56.7   | 56.8   | 47.9   | 55.8   | 56.4     | 54.5    | 60.7    | 57.0   | 37.9   | 41.6   |
| Sr/Y                                   | 14.1                    | 15.9   | 15.6   | 16.1   | 15.0     | 15.3   | 16.3   | 13.4   | 12.4   | 12.9   | 12.4     | 16.4    | 18.0    | 14.6   | 8.98   | 8.56   |
| Nb/La                                  | 0.34                    | 0.27   | 0.37   | 0.27   | 0.32     | 0.31   | 0.29   | 0.32   | 0.42   | 0.31   | 0.33     | 0.28    | 0.32    | 0.28   | 0.42   | 0.31   |
| Nb/U                                   | 7.36                    | 5.27   | 3.38   | 10.2   | 2.07     | 6.70   | 11.9   | 8.71   | 4.97   | 2.69   | 2.70     | 2.11    | 2.50    | 3.81   | 13.4   | 26.0   |

Table S3: Continued

| Location                         |        |        |        |        |        |        |        |        |        | Qizanmi intrusion       |          |          |          |          |          |
|----------------------------------|--------|--------|--------|--------|--------|--------|--------|--------|--------|-------------------------|----------|----------|----------|----------|----------|
| Sample                           | DDK-32 | DDK-33 | DDK-34 | DDK-35 | DDK-36 | DDK-37 | DDK-38 | DDK-39 | DDK-40 | 13AL02-3                | 13AL02-4 | 13AL02-5 | 13AL02-6 | 11AL15-1 | 11AL15-2 |
| Rock type                        |        |        |        |        |        |        |        |        |        | Sub alkaline mafic rock |          |          |          |          |          |
| Reference                        |        |        |        |        |        |        |        |        |        | Liu et al., 2019        |          |          |          |          |          |
| Age(Ma)                          | 748    |        |        |        |        |        |        |        |        |                         |          |          |          |          |          |
| Major(wt.%)                      |        |        |        |        |        |        |        |        |        |                         |          |          |          |          |          |
| SiO <sub>2</sub>                 | 49.77  | 48.34  | 48.68  | 49.83  | 49.23  | 49.32  | 47.95  | 48.82  | 49.28  | 49.30                   | 47.90    | 48.20    | 49.40    | 49.70    | 49.70    |
| TiO <sub>2</sub>                 | 1.42   | 1.31   | 1.69   | 1.46   | 1.46   | 2.05   | 2.11   | 1.54   | 1.24   | 0.27                    | 0.25     | 0.49     | 0.21     | 0.57     | 0.56     |
| Al <sub>2</sub> O <sub>3</sub>   | 15.60  | 16.24  | 16.33  | 15.05  | 15.29  | 15.59  | 16.12  | 15.75  | 15.56  | 24.00                   | 20.80    | 17.60    | 17.50    | 19.20    | 19.20    |
| Fe <sub>2</sub> O <sub>3</sub> T | 13.40  | 13.43  | 15.10  | 14.27  | 14.79  | 16.44  | 17.25  | 14.37  | 13.24  | 1.16                    | 1.57     | 3.91     | 3.16     | 3.29     | 3.44     |
| Fe <sub>2</sub> O <sub>3</sub>   |        |        |        |        |        |        |        |        |        |                         |          |          |          |          |          |
| FeO                              |        |        |        |        |        |        |        |        |        | 2.95                    | 4.12     | 5.89     | 6.03     | 3.85     | 3.72     |
| MnO                              | 0.23   | 0.21   | 0.24   | 0.26   | 0.25   | 0.35   | 0.25   | 0.25   | 0.21   | 0.06                    | 0.08     | 0.15     | 0.14     | 0.11     | 0.11     |
| MgO                              | 5.73   | 5.74   | 4.67   | 5.69   | 5.73   | 3.30   | 3.73   | 5.11   | 7.00   | 6.34                    | 9.59     | 7.51     | 8.13     | 7.04     | 7.02     |
| CaO                              | 9.81   | 9.98   | 9.67   | 9.87   | 9.18   | 8.54   | 8.86   | 9.79   | 10.22  | 11.34                   | 9.67     | 9.85     | 8.50     | 10.08    | 9.76     |
| Na <sub>2</sub> O                | 3.22   | 3.06   | 3.11   | 2.97   | 3.14   | 3.83   | 3.45   | 3.16   | 2.81   | 2.73                    | 2.26     | 2.57     | 2.91     | 2.22     | 2.26     |
| K <sub>2</sub> O                 | 0.34   | 0.37   | 0.19   | 0.24   | 0.31   | 0.28   | 0.27   | 0.26   | 0.29   | 0.29                    | 0.44     | 0.22     | 0.29     | 1.34     | 1.46     |
| P <sub>2</sub> O <sub>5</sub>    | 0.22   | 0.19   | 0.30   | 0.12   | 0.22   | 0.59   | 0.52   | 0.25   | 0.19   | 0.05                    | 0.05     | 0.02     | 0.03     | 0.06     | 0.06     |
| LOI                              | 0.29   | 0.99   | 0.40   | 0.57   | 0.06   | -0.36  | -0.19  | 0.46   | 0.72   | 1.16                    | 2.66     | 1.87     | 2.02     | 2.02     | 2.27     |
| TOL                              | 100.03 | 99.87  | 100.36 | 100.34 | 99.67  | 99.93  | 100.30 | 99.77  | 100.75 | 99.60                   | 99.50    | 98.30    | 98.20    | 99.50    | 99.50    |
| Trace(ppm)                       |        |        |        |        |        |        |        |        |        |                         |          |          |          |          |          |
| Li                               |        |        |        |        |        |        |        |        |        | 4.06                    | 25.3     | 8.46     | 8.15     | 11.8     | 13.0     |
| Be                               |        |        |        |        |        |        |        |        |        | 0.28                    | 0.31     | 0.37     | 0.44     | 0.48     | 0.53     |
| Sc                               | 39.3   | 41.4   | 39.5   | 53.8   | 40.4   | 42.3   | 37.4   | 39.4   | 39.5   | 5.80                    | 6.10     | 27.9     | 26.3     | 25.5     | 25.1     |
| V                                | 283    | 327    | 358    | 337    | 358    | 144    | 190    | 312    | 259    | 41.5                    | 29.0     | 36.8     | 212      | 144      | 147      |
| Cr                               | 36.0   | 19.1   | 6.80   | 11.5   | 7.60   | 4.60   | 5.60   | 7.70   | 38.3   | 228                     | 269      | 175      | 293      | 66.4     | 69.5     |
| Co                               | 41.3   | 40.1   | 38.9   | 42.6   | 42.6   | 25.2   | 37.0   | 36.7   | 41.7   | 29.1                    | 50.0     | 41.9     | 38.4     | 37.8     | 38.8     |
| Ni                               | 12.5   | 13.4   | 4.76   | 8.06   | 6.20   | 2.52   | 3.36   | 5.30   | 11.4   | 217                     | 304      | 104      | 70.6     | 74.5     | 80.1     |
| Cu                               |        |        |        |        |        |        |        |        |        | 40.4                    | 80.0     | 73.6     | 29.6     | 53.4     | 45.7     |
| Zn                               |        |        |        |        |        |        |        |        |        | 31.6                    | 44.2     | 57.6     | 60.5     | 49.9     | 52.9     |



Table S3: Continued

| Location  |        |        |        |        |        |        |        |        |        | Qizanmi intrusion       |          |          |          |          |          |
|-----------|--------|--------|--------|--------|--------|--------|--------|--------|--------|-------------------------|----------|----------|----------|----------|----------|
| Sample    | DDK-32 | DDK-33 | DDK-34 | DDK-35 | DDK-36 | DDK-37 | DDK-38 | DDK-39 | DDK-40 | 13AL02-3                | 13AL02-4 | 13AL02-5 | 13AL02-6 | 11AL15-1 | 11AL15-2 |
| Rock type |        |        |        |        |        |        |        |        |        | Sub alkaline mafic rock |          |          |          |          |          |
| Reference |        |        |        |        |        |        |        |        |        | Liu et al., 2019        |          |          |          |          |          |
| Age(Ma)   |        |        |        |        |        |        |        |        |        | 748                     |          |          |          |          |          |
| Ga        |        |        |        |        |        |        |        |        |        | 16.0                    | 15.3     | 18.9     | 18.7     | 18.3     | 18.1     |
| Ge        |        |        |        |        |        |        |        |        |        |                         |          |          |          |          |          |
| Rb        | 0.97   | 2.36   | 1.15   | 1.13   | 1.52   | 0.96   | 2.02   | 1.40   | 1.85   | 5.68                    | 14.0     | 4.56     | 7.03     | 38.9     | 43.4     |
| Sr        | 357    | 383    | 408    | 387    | 421    | 424    | 405    | 355    | 321    | 623                     | 522      | 644      | 578      | 559      | 547      |
| Y         | 26.4   | 24.4   | 15.8   | 31.1   | 26.6   | 25.4   | 24.2   | 33.0   | 41.3   | 4.46                    | 4.39     | 8.53     | 7.10     | 8.23     | 8.18     |
| Zr        | 74.0   | 84.0   | 78.0   | 45.0   | 44.0   | 130    | 218    | 45.0   | 64.0   | 23.2                    | 25.2     | 18.2     | 13.4     | 20.0     | 19.8     |
| Nb        | 5.36   | 3.37   | 3.97   | 5.47   | 5.06   | 12.9   | 6.61   | 6.31   | 3.76   | 1.00                    | 0.90     | 1.00     | 0.80     | 0.90     | 0.90     |
| Sn        |        |        |        |        |        |        |        |        |        | 0.33                    | 0.35     | 0.57     | 0.50     | 0.37     | 0.39     |
| Cs        | 0.02   | 0.04   | 0.05   | 0.04   | 0.05   | 0.02   | 0.07   | 0.06   | 0.04   | 1.18                    | 1.27     | 0.31     | 0.53     | 0.50     | 0.56     |
| Ba        | 299    | 227    | 225    | 270    | 346    | 360    | 329    | 279    | 249    | 89.4                    | 115      | 45.7     | 97.9     | 269      | 296      |
| La        | 12.9   | 10.6   | 11.2   | 11.0   | 12.8   | 21.5   | 18.7   | 14.4   | 16.2   | 4.12                    | 3.82     | 2.80     | 2.77     | 4.94     | 4.85     |
| Ce        | 29.3   | 24.9   | 22.3   | 26.2   | 29.5   | 44.9   | 40.4   | 35.0   | 44.3   | 8.20                    | 7.60     | 5.80     | 5.30     | 10.8     | 10.9     |
| Pr        | 3.90   | 3.42   | 2.78   | 3.90   | 4.13   | 5.68   | 5.27   | 5.06   | 6.50   | 1.04                    | 0.97     | 0.84     | 0.73     | 1.44     | 1.45     |
| Nd        | 17.3   | 15.2   | 11.9   | 18.8   | 18.6   | 26.9   | 24.0   | 24.3   | 30.4   | 4.19                    | 4.00     | 4.01     | 3.45     | 6.57     | 6.59     |
| Sm        | 4.30   | 3.76   | 2.80   | 5.07   | 4.62   | 6.45   | 5.27   | 6.23   | 7.56   | 0.85                    | 0.86     | 1.24     | 0.99     | 1.58     | 1.62     |
| Eu        | 1.77   | 1.48   | 1.47   | 1.68   | 1.76   | 3.47   | 2.39   | 2.12   | 1.72   | 0.56                    | 0.54     | 0.82     | 0.73     | 0.73     | 0.73     |
| Gd        | 4.84   | 4.16   | 3.16   | 5.58   | 5.00   | 6.72   | 5.58   | 6.64   | 8.05   | 0.89                    | 0.91     | 1.41     | 1.13     | 1.61     | 1.63     |
| Tb        | 0.78   | 0.70   | 0.49   | 0.92   | 0.78   | 0.96   | 0.82   | 1.07   | 1.28   | 0.15                    | 0.15     | 0.26     | 0.20     | 0.26     | 0.27     |
| Dy        | 4.68   | 4.27   | 2.91   | 5.72   | 4.97   | 5.43   | 4.84   | 6.63   | 8.02   | 0.86                    | 0.89     | 1.64     | 1.36     | 1.53     | 1.53     |
| Ho        | 0.96   | 0.87   | 0.58   | 1.15   | 0.99   | 1.04   | 0.98   | 1.35   | 1.61   | 0.18                    | 0.18     | 0.34     | 0.28     | 0.30     | 0.32     |
| Er        | 2.89   | 2.64   | 1.72   | 3.42   | 2.92   | 2.89   | 2.82   | 3.98   | 4.80   | 0.49                    | 0.46     | 0.91     | 0.83     | 0.87     | 0.89     |
| Tm        | 0.41   | 0.38   | 0.24   | 0.47   | 0.42   | 0.37   | 0.38   | 0.53   | 0.66   | 0.07                    | 0.07     | 0.14     | 0.12     | 0.11     | 0.12     |
| Yb        | 2.70   | 2.49   | 1.61   | 3.02   | 2.74   | 2.44   | 2.46   | 3.36   | 4.24   | 0.43                    | 0.42     | 0.92     | 0.80     | 0.79     | 0.72     |
| Lu        | 0.39   | 0.36   | 0.24   | 0.44   | 0.40   | 0.37   | 0.37   | 0.50   | 0.61   | 0.06                    | 0.07     | 0.13     | 0.12     | 0.11     | 0.11     |
| Hf        | 2.02   | 2.27   | 1.99   | 1.51   | 1.31   | 3.00   | 4.58   | 1.60   | 2.45   | 0.56                    | 0.58     | 0.61     | 0.44     | 0.66     | 0.65     |
| Ta        | 0.25   | 0.17   | 0.21   | 0.27   | 0.24   | 0.42   | 0.34   | 0.31   | 0.23   | 0.07                    | 0.06     | 0.07     | 0.06     | 0.06     | 0.06     |

Table S3: Continued

| Location                            |                         |        |        |        |          |        |        |        |        | Qizanmi intrusion |          |          |          |          |          |
|-------------------------------------|-------------------------|--------|--------|--------|----------|--------|--------|--------|--------|-------------------|----------|----------|----------|----------|----------|
| Sample                              | DDK-32                  | DDK-33 | DDK-34 | DDK-35 | DDK-36   | DDK-37 | DDK-38 | DDK-39 | DDK-40 | 13AL02-3          | 13AL02-4 | 13AL02-5 | 13AL02-6 | 11AL15-1 | 11AL15-2 |
| Rock type                           | Sub alkaline mafic rock |        |        |        |          |        |        |        |        |                   |          |          |          |          |          |
| Reference                           | Liu et al., 2019        |        |        |        |          |        |        |        |        |                   |          |          |          |          |          |
| Age(Ma)                             | 748                     |        |        |        |          |        |        |        |        |                   |          |          |          |          |          |
| Pb                                  | 2.76                    | 2.41   | 2.26   | 2.74   | 2.88     | 3.33   | 3.44   | 3.06   | 2.35   | 4.56              | 3.24     | 3.46     | 2.49     | 2.69     | 2.66     |
| Th                                  | 0.63                    | 0.50   | 0.54   | 0.62   | 0.85     | 0.61   | 0.86   | 0.52   | 0.34   | 0.55              | 0.43     | 0.06     | 0.06     | 0.21     | 0.20     |
| U                                   | 0.95                    | 0.70   | 0.76   | 0.89   | 0.87     | 0.84   | 1.00   | 0.49   | 0.41   | 0.10              | 0.10     | 0.02     | 0.06     | 0.04     | 0.04     |
| Isotopic date                       |                         |        |        |        |          |        |        |        |        |                   |          |          |          |          |          |
| $^{87}\text{Sr}/^{86}\text{Sr}$ (t) |                         |        |        |        | 0.707460 |        |        |        |        | 0.7040            |          | 0.7049   |          | 0.7051   | 0.7047   |
| $\epsilon_{\text{Nd}}$ (t)          |                         |        |        |        | 1.19     |        |        |        |        | 1.70              |          | 0.80     |          | 0.50     | 0.40     |
| Ratio                               |                         |        |        |        |          |        |        |        |        |                   |          |          |          |          |          |
| Mg#                                 | 49.9                    | 49.9   | 41.9   | 48.2   | 47.4     | 31.9   | 33.5   | 45.3   | 55.2   | 92.7              | 93.4     | 81.7     | 85.7     | 83.3     | 82.6     |
| Sr/Y                                | 13.5                    | 15.7   | 25.8   | 12.4   | 15.8     | 16.7   | 16.7   | 10.8   | 7.77   | 140               | 119      | 75.5     | 81.4     | 67.9     | 66.9     |
| Nb/La                               | 0.42                    | 0.32   | 0.35   | 0.50   | 0.40     | 0.60   | 0.35   | 0.44   | 0.23   | 0.24              | 0.24     | 0.36     | 0.29     | 0.18     | 0.19     |
| Nb/U                                | 5.64                    | 4.81   | 5.22   | 6.15   | 5.82     | 15.3   | 6.61   | 12.9   | 9.17   | 10.0              | 9.00     | 50.0     | 13.3     | 22.5     | 22.5     |

Table S3: Continued

| Location                       |       |       |       |       |       |       |       |       |       |       |       |       |       |       |       |       |
|--------------------------------|-------|-------|-------|-------|-------|-------|-------|-------|-------|-------|-------|-------|-------|-------|-------|-------|
| Sample                         | YB1   | YB2   | YB3   | YB4   | YB5   | YB6   | YB7   | YB9   | YB10  | YB11  | YB12  | YB13  | YB14  | YB15  | YB16  | YB17  |
| Rock type                      |       |       |       |       |       |       |       |       |       |       |       |       |       |       |       |       |
| Reference                      |       |       |       |       |       |       |       |       |       |       |       |       |       |       |       |       |
| Age(Ma)                        | 840   |       |       |       |       |       |       |       |       |       |       |       |       |       |       |       |
| Major(wt.%)                    |       |       |       |       |       |       |       |       |       |       |       |       |       |       |       |       |
| SiO <sub>2</sub>               | 44.89 | 46.14 | 44.67 | 44.65 | 45.17 | 44.32 | 45.74 | 44.87 | 46.17 | 43.93 | 45.43 | 44.95 | 46.06 | 43.98 | 45.84 | 45.77 |
| TiO <sub>2</sub>               | 2.27  | 2.36  | 1.73  | 2.29  | 2.02  | 2.27  | 1.98  | 1.91  | 1.81  | 1.98  | 1.93  | 1.84  | 1.98  | 1.90  | 1.89  | 1.64  |
| Al <sub>2</sub> O <sub>3</sub> | 15.24 | 15.38 | 16.07 | 15.06 | 15.30 | 14.43 | 15.61 | 15.55 | 15.01 | 15.93 | 15.33 | 15.35 | 15.42 | 15.13 | 15.28 | 14.22 |
| Fe2O3T                         | 12.22 | 12.80 | 10.70 | 12.84 | 11.96 | 13.97 | 12.84 | 12.66 | 12.48 | 13.31 | 13.48 | 12.43 | 12.72 | 13.27 | 12.57 | 13.80 |
| Fe <sub>2</sub> O <sub>3</sub> |       |       |       |       |       |       |       |       |       |       |       |       |       |       |       |       |
| FeO                            |       |       |       |       |       |       |       |       |       |       |       |       |       |       |       |       |
| MnO                            | 0.20  | 0.20  | 0.19  | 0.20  | 0.19  | 0.20  | 0.18  | 0.18  | 0.18  | 0.19  | 0.19  | 0.16  | 0.22  | 0.19  | 0.21  | 0.19  |
| MgO                            | 7.32  | 8.30  | 8.33  | 7.07  | 7.65  | 7.52  | 6.24  | 5.16  | 5.45  | 6.86  | 5.91  | 5.58  | 6.29  | 6.75  | 6.80  | 7.24  |
| CaO                            | 11.60 | 10.92 | 10.88 | 9.51  | 10.07 | 8.87  | 10.21 | 14.63 | 13.51 | 10.63 | 11.78 | 15.08 | 10.64 | 13.24 | 11.96 | 10.98 |
| Na <sub>2</sub> O              | 1.90  | 2.04  | 2.22  | 3.18  | 2.78  | 2.65  | 2.93  | 1.22  | 1.70  | 2.48  | 2.43  | 1.09  | 2.75  | 1.24  | 1.97  | 2.13  |
| K <sub>2</sub> O               | 0.28  | 0.24  | 0.95  | 0.21  | 0.69  | 0.39  | 0.16  | 0.06  | 0.09  | 0.07  | 0.11  | 0.06  | 0.18  | 0.15  | 0.28  | 0.14  |
| P <sub>2</sub> O <sub>5</sub>  | 0.26  | 0.26  | 0.18  | 0.26  | 0.24  | 0.33  | 0.18  | 0.19  | 0.18  | 0.18  | 0.18  | 0.17  | 0.18  | 0.18  | 0.16  | 0.17  |
| LOI                            | 3.28  | 0.64  | 3.39  | 3.41  | 3.01  | 3.80  | 3.29  | 2.51  | 2.30  | 3.37  | 2.80  | 2.15  | 2.63  | 2.73  | 2.40  | 2.97  |
| TOL                            | 99.46 | 99.27 | 99.31 | 98.68 | 99.08 | 98.78 | 99.36 | 98.93 | 98.88 | 98.93 | 99.56 | 98.87 | 99.07 | 98.77 | 99.38 | 99.26 |
| Trace(ppm)                     |       |       |       |       |       |       |       |       |       |       |       |       |       |       |       |       |
| Li                             |       |       |       |       |       |       |       |       |       |       |       |       |       |       |       |       |
| Be                             |       |       |       |       |       |       |       |       |       |       |       |       |       |       |       |       |
| Sc                             | 36.8  | 37.8  | 35.2  | 42.1  | 36.2  | 35.3  | 41.8  | 37.9  | 36.6  | 40.0  | 38.2  | 35.7  | 40.1  | 40.6  | 42.6  | 43.9  |
| V                              | 354   | 379   | 315   | 389   | 348   | 375   | 349   | 332   | 315   | 361   | 326   | 329   | 343   | 353   | 354   | 404   |
| Cr                             | 109   | 114   | 61.0  | 107   | 99.0  | 176   | 134   | 128   | 124   | 125   | 124   | 122   | 133   | 137   | 141   | 183   |
| Co                             | 45.8  | 45.7  | 50.5  | 50.7  | 51.6  | 51.4  | 46.9  | 43.8  | 43.5  | 44.4  | 43.9  | 44.7  | 47.8  | 49.7  | 48.3  | 43.0  |
| Ni                             | 73.1  | 65.0  | 182   | 57.3  | 87.8  | 105   | 81.8  | 69.5  | 90.3  | 72.9  | 68.1  | 66.1  | 71.6  | 76.6  | 65.6  | 63.4  |
| Cu                             | 71.4  | 73.6  | 75.3  | 91.1  | 80.6  | 66.1  | 72.3  | 72.9  | 65.8  | 73.1  | 74.2  | 71.7  | 71.0  | 74.9  | 75.8  | 92.7  |
| Zn                             | 131   | 114   | 104   | 125   | 119   | 135   | 119   | 106   | 99.0  | 110   | 135   | 91.0  | 113   | 121   | 111   | 123   |

**Table S3: Continued**

| Location  |      |      |      |      |      |      |      |      |      |      |      |      |      |      |      |      |
|-----------|------|------|------|------|------|------|------|------|------|------|------|------|------|------|------|------|
| Sample    | YB1  | YB2  | YB3  | YB4  | YB5  | YB6  | YB7  | YB9  | YB10 | YB11 | YB12 | YB13 | YB14 | YB15 | YB16 | YB17 |
| Rock type |      |      |      |      |      |      |      |      |      |      |      |      |      |      |      |      |
| Reference |      |      |      |      |      |      |      |      |      |      |      |      |      |      |      |      |
| Age(Ma)   | 840  |      |      |      |      |      |      |      |      |      |      |      |      |      |      |      |
| Ga        |      |      |      |      |      |      |      |      |      |      |      |      |      |      |      |      |
| Ge        |      |      |      |      |      |      |      |      |      |      |      |      |      |      |      |      |
| Rb        | 5.88 | 3.80 | 19.8 | 2.88 | 11.5 | 5.90 | 1.97 | 0.65 | 2.77 | 0.80 | 1.46 | 0.67 | 2.17 | 2.55 | 8.57 | 2.25 |
| Sr        | 452  | 311  | 603  | 292  | 364  | 256  | 254  | 488  | 430  | 255  | 295  | 424  | 242  | 377  | 279  | 230  |
| Y         | 30.1 | 30.3 | 22.5 | 29.5 | 25.9 | 34.3 | 32.7 | 31.6 | 30.2 | 33.0 | 31.5 | 30.1 | 32.3 | 32.5 | 31.5 | 33.0 |
| Zr        | 170  | 163  | 123  | 165  | 148  | 141  | 121  | 118  | 111  | 121  | 120  | 112  | 119  | 124  | 118  | 77.0 |
| Nb        | 5.79 | 5.57 | 5.19 | 6.91 | 5.39 | 4.76 | 3.16 | 3.01 | 2.83 | 2.93 | 3.01 | 2.75 | 2.85 | 3.06 | 3.17 | 1.84 |
| Sn        |      |      |      |      |      |      |      |      |      |      |      |      |      |      |      |      |
| Cs        | 0.16 | 0.11 | 0.40 | 0.15 | 0.26 | 0.10 | 0.03 | 0.02 | 0.09 | 0.02 | 0.04 | 0.03 | 0.04 | 0.05 | 0.27 | 0.06 |
| Ba        | 53.2 | 37.8 | 97.2 | 63.4 | 112  | 124  | 28.8 | 15.1 | 20.2 | 13.8 | 17.8 | 13.0 | 28.1 | 19.7 | 36.5 | 54.0 |
| La        | 9.45 | 8.76 | 7.28 | 8.98 | 7.69 | 9.19 | 5.09 | 5.32 | 5.21 | 5.38 | 5.24 | 5.04 | 5.35 | 5.30 | 5.44 | 4.69 |
| Ce        | 26.1 | 24.2 | 19.9 | 24.7 | 21.4 | 24.4 | 16.1 | 16.3 | 15.7 | 16.7 | 16.0 | 15.3 | 16.4 | 16.2 | 16.2 | 12.9 |
| Pr        | 3.98 | 3.73 | 2.95 | 3.76 | 3.29 | 3.77 | 2.68 | 2.68 | 2.59 | 2.76 | 2.69 | 2.54 | 2.77 | 2.73 | 2.59 | 2.13 |
| Nd        | 19.5 | 18.4 | 14.3 | 18.2 | 16.0 | 18.8 | 14.2 | 14.2 | 13.6 | 14.8 | 14.2 | 13.4 | 14.5 | 14.2 | 13.6 | 11.5 |
| Sm        | 5.37 | 5.17 | 3.92 | 5.03 | 4.39 | 5.52 | 4.62 | 4.57 | 4.39 | 4.75 | 4.57 | 4.29 | 4.73 | 4.55 | 4.43 | 3.84 |
| Eu        | 1.93 | 1.74 | 1.39 | 1.79 | 1.53 | 1.94 | 1.59 | 1.62 | 1.62 | 1.72 | 1.66 | 1.53 | 1.71 | 1.66 | 1.59 | 1.34 |
| Gd        | 5.94 | 5.79 | 4.30 | 5.61 | 4.91 | 6.37 | 5.71 | 5.72 | 5.40 | 5.94 | 5.65 | 5.40 | 5.77 | 5.66 | 5.32 | 5.01 |
| Tb        | 0.94 | 0.92 | 0.68 | 0.88 | 0.78 | 1.01 | 0.96 | 0.96 | 0.91 | 1.00 | 0.97 | 0.91 | 0.99 | 0.97 | 0.90 | 0.87 |
| Dy        | 5.76 | 5.57 | 3.96 | 5.20 | 4.62 | 6.17 | 6.21 | 6.00 | 5.75 | 6.33 | 6.07 | 5.78 | 6.18 | 6.03 | 5.63 | 5.62 |
| Ho        | 1.13 | 1.06 | 0.78 | 0.99 | 0.88 | 1.22 | 1.26 | 1.25 | 1.18 | 1.29 | 1.23 | 1.18 | 1.26 | 1.25 | 1.15 | 1.14 |
| Er        | 3.17 | 3.09 | 2.24 | 2.87 | 2.57 | 3.60 | 3.68 | 3.69 | 3.56 | 3.88 | 3.66 | 3.47 | 3.81 | 3.71 | 3.40 | 3.52 |
| Tm        | 0.43 | 0.41 | 0.29 | 0.39 | 0.34 | 0.50 | 0.51 | 0.50 | 0.49 | 0.53 | 0.51 | 0.49 | 0.53 | 0.50 | 0.47 | 0.50 |
| Yb        | 2.70 | 2.64 | 1.84 | 2.45 | 2.11 | 3.20 | 3.22 | 3.33 | 3.19 | 3.47 | 3.28 | 3.12 | 3.33 | 3.15 | 3.12 | 3.30 |
| Lu        | 0.40 | 0.37 | 0.26 | 0.35 | 0.31 | 0.47 | 0.48 | 0.49 | 0.47 | 0.49 | 0.48 | 0.45 | 0.50 | 0.48 | 0.44 | 0.47 |
| Hf        | 4.21 | 3.88 | 2.94 | 3.54 | 3.21 | 3.50 | 3.42 | 3.31 | 3.26 | 3.39 | 3.39 | 3.24 | 3.41 | 3.22 | 3.16 | 2.19 |
| Ta        | 0.44 | 0.41 | 0.37 | 0.43 | 0.36 | 0.34 | 0.49 | 0.26 | 0.26 | 0.26 | 0.26 | 0.25 | 0.26 | 0.27 | 0.26 | 0.14 |

Table S3: Continued

| Location                               |      |      |       |      |      |      |          |      |          |      |      |      |      |      |      |      |
|----------------------------------------|------|------|-------|------|------|------|----------|------|----------|------|------|------|------|------|------|------|
| Sample                                 | YB1  | YB2  | YB3   | YB4  | YB5  | YB6  | YB7      | YB9  | YB10     | YB11 | YB12 | YB13 | YB14 | YB15 | YB16 | YB17 |
| Rock type                              |      |      |       |      |      |      |          |      |          |      |      |      |      |      |      |      |
| Reference                              |      |      |       |      |      |      |          |      |          |      |      |      |      |      |      |      |
| Age(Ma)                                | 840  |      |       |      |      |      |          |      |          |      |      |      |      |      |      |      |
| Pb                                     | 1.94 | 0.77 | 1.21  | 0.69 | 0.95 | 1.67 | 0.61     | 1.07 | 1.65     | 0.75 | 0.92 | 1.45 | 0.95 | 1.00 | 1.81 | 0.79 |
| Th                                     | 0.49 | 0.25 | 0.21  | 0.26 | 0.32 | 0.48 | 0.30     | 0.29 | 0.59     | 0.29 | 0.24 | 0.21 | 0.22 | 0.20 | 0.84 | 0.19 |
| U                                      | 0.11 | 0.03 | 0.060 | 0.15 | 0.36 | 0.33 | 0.38     | 0.31 | 0.49     | 0.34 | 0.20 | 0.11 | 0.12 | 0.14 | 0.27 | 0.20 |
| Isotopic date                          |      |      |       |      |      |      |          |      |          |      |      |      |      |      |      |      |
| <sup>87</sup> Sr/ <sup>86</sup> Sr (t) |      |      |       |      |      |      | 0.703216 |      | 0.702995 |      |      |      |      |      |      |      |
| εNd (t)                                |      |      |       |      |      |      | 8.02     |      | 7.21     |      |      |      |      |      |      |      |
| Ratio                                  |      |      |       |      |      |      |          |      |          |      |      |      |      |      |      |      |
| Mg#                                    | 58.3 | 60.2 | 64.5  | 56.2 | 59.9 | 55.6 | 53.1     | 48.7 | 50.4     | 54.6 | 50.5 | 51.1 | 53.5 | 54.2 | 55.8 | 55.0 |
| Sr/Y                                   | 15.0 | 10.3 | 26.8  | 9.90 | 14.1 | 7.46 | 7.77     | 15.4 | 14.2     | 7.73 | 9.37 | 14.1 | 7.49 | 11.6 | 8.86 | 6.97 |
| Nb/La                                  | 0.61 | 0.64 | 0.71  | 0.77 | 0.70 | 0.52 | 0.62     | 0.57 | 0.54     | 0.54 | 0.57 | 0.55 | 0.53 | 0.58 | 0.58 | 0.39 |
| Nb/U                                   | 52.6 | 186  | 86.5  | 46.1 | 15.0 | 14.4 | 8.32     | 9.71 | 5.78     | 8.62 | 15.1 | 25.0 | 23.8 | 21.9 | 11.7 | 9.20 |

Table S3: Continued

| Yanbian basalt                 |                         |       |        |       |       |       |       |       |       |       |       |       |       |       |       |       |
|--------------------------------|-------------------------|-------|--------|-------|-------|-------|-------|-------|-------|-------|-------|-------|-------|-------|-------|-------|
| Location                       |                         |       |        |       |       |       |       |       |       |       |       |       |       |       |       |       |
| Sample                         | YB18                    | YB19  | YB20   | YB21  | YB22  | YB23  | B23-2 | YB24  | YB25  | YB26  | YB29  | YB31  | YB32  | YB33  | YB34  | YB36  |
| Rock type                      | Sub alkaline mafic rock |       |        |       |       |       |       |       |       |       |       |       |       |       |       |       |
| Reference                      | Sun et al., 2007        |       |        |       |       |       |       |       |       |       |       |       |       |       |       |       |
| Age(Ma)                        |                         |       |        |       |       |       |       |       |       |       |       |       |       |       |       |       |
| Major(wt.%)                    |                         |       |        |       |       |       |       |       |       |       |       |       |       |       |       |       |
| SiO <sub>2</sub>               | 47.08                   | 44.95 | 43.91  | 46.36 | 45.43 | 46.27 | 45.99 | 47.34 | 46.49 | 44.63 | 47.13 | 45.04 | 45.77 | 44.89 | 46.18 | 47.49 |
| TiO <sub>2</sub>               | 1.70                    | 1.93  | 1.90   | 1.65  | 1.66  | 1.86  | 1.69  | 2.03  | 1.84  | 2.07  | 1.69  | 1.44  | 1.40  | 1.46  | 1.38  | 1.59  |
| Al <sub>2</sub> O <sub>3</sub> | 14.47                   | 14.89 | 15.87  | 14.29 | 15.57 | 14.60 | 15.19 | 13.35 | 14.07 | 13.95 | 14.37 | 14.98 | 15.15 | 15.53 | 15.06 | 14.67 |
| Fe2O3T                         | 11.88                   | 12.79 | 13.33  | 13.79 | 12.54 | 13.78 | 12.54 | 13.59 | 12.45 | 13.69 | 12.21 | 12.29 | 12.19 | 12.39 | 12.00 | 12.85 |
| Fe <sub>2</sub> O <sub>3</sub> |                         |       |        |       |       |       |       |       |       |       |       |       |       |       |       |       |
| FeO                            |                         |       |        |       |       |       |       |       |       |       |       |       |       |       |       |       |
| MnO                            | 0.18                    | 0.20  | 0.20   | 0.21  | 0.21  | 0.21  | 0.20  | 0.21  | 0.19  | 0.25  | 0.19  | 0.22  | 0.17  | 0.19  | 0.19  | 0.26  |
| MgO                            | 6.42                    | 7.78  | 8.25   | 7.12  | 6.56  | 6.36  | 6.88  | 6.51  | 7.15  | 6.78  | 6.63  | 8.11  | 7.08  | 6.96  | 7.68  | 7.78  |
| CaO                            | 13.05                   | 11.83 | 11.13  | 11.75 | 12.15 | 10.08 | 11.27 | 11.21 | 11.19 | 11.85 | 10.93 | 8.58  | 10.97 | 11.80 | 11.03 | 7.67  |
| Na <sub>2</sub> O              | 1.51                    | 1.90  | 1.79   | 1.84  | 2.00  | 2.93  | 2.31  | 2.23  | 2.18  | 2.32  | 2.27  | 2.10  | 2.52  | 2.16  | 1.91  | 2.87  |
| K <sub>2</sub> O               | 0.12                    | 0.28  | 0.29   | 0.17  | 0.52  | 0.18  | 0.15  | 0.30  | 0.19  | 0.14  | 0.42  | 0.86  | 0.30  | 0.23  | 0.29  | 0.58  |
| P <sub>2</sub> O <sub>5</sub>  | 0.16                    | 0.17  | 0.18   | 0.17  | 0.22  | 0.26  | 0.21  | 0.26  | 0.23  | 0.27  | 0.24  | 0.19  | 0.19  | 0.20  | 0.15  | 0.20  |
| LOI                            | 2.40                    | 2.91  | 3.16   | 2.49  | 2.67  | 3.13  | 2.46  | 2.18  | 2.60  | 2.67  | 2.82  | 4.77  | 3.07  | 3.06  | 3.33  | 3.46  |
| TOL                            | 98.98                   | 99.63 | 100.02 | 99.84 | 99.52 | 99.64 | 98.89 | 99.20 | 98.60 | 98.63 | 98.91 | 98.58 | 98.82 | 98.88 | 99.20 | 99.41 |
| Trace(ppm)                     |                         |       |        |       |       |       |       |       |       |       |       |       |       |       |       |       |
| Li                             |                         |       |        |       |       |       |       |       |       |       |       |       |       |       |       |       |
| Be                             |                         |       |        |       |       |       |       |       |       |       |       |       |       |       |       |       |
| Sc                             | 38.5                    | 42.9  | 42.4   | 44.6  | 40.6  | 42.7  | 35.3  | 42.8  | 40.9  | 42.7  | 39.2  | 43.0  | 42.8  | 41.1  | 38.0  | 40.1  |
| V                              | 342                     | 371   | 365    | 403   | 353   | 489   | 315   | 398   | 363   | 402   | 353   | 370   | 355   | 356   | 321   | 364   |
| Cr                             | 127                     | 141   | 145    | 179   | 263   | 55.0  | 230   | 205   | 238   | 217   | 206   | 239   | 230   | 222   | 266   | 203   |
| Co                             | 41.4                    | 56.0  | 60.0   | 54.4  | 44.2  | 45.9  | 46.4  | 42.2  | 35.7  | 39.2  | 36.6  | 48.2  | 43.9  | 44.9  | 33.3  | 24.6  |
| Ni                             | 69.5                    | 83.0  | 108    | 74.8  | 91.0  | 38.1  | 97.9  | 59.8  | 73.3  | 62.2  | 62.7  | 79.0  | 77.2  | 73.5  | 94.9  | 60.1  |
| Cu                             | 75.8                    | 92.7  | 79.0   | 91.9  | 64.7  | 80.8  | 66.5  | 87.2  | 61.8  | 87.8  | 68.4  | 76.8  | 86.3  | 50.1  | 77.8  | 59.1  |
| Zn                             | 111                     | 123   | 134    | 146   | 125   | 158   | 112   | 124   | 111   | 118   | 130   | 150   | 83.0  | 90.0  | 119   | 105   |

Table S3: Continued

| Location  |                         |      |      |      |      |      |       |      |      |      |      |      |      |      |      |      | Yanbian basalt |  |  |  |  |  |  |
|-----------|-------------------------|------|------|------|------|------|-------|------|------|------|------|------|------|------|------|------|----------------|--|--|--|--|--|--|
| Sample    | YB18                    | YB19 | YB20 | YB21 | YB22 | YB23 | B23-2 | YB24 | YB25 | YB26 | YB29 | YB31 | YB32 | YB33 | YB34 | YB36 |                |  |  |  |  |  |  |
| Rock type | Sub alkaline mafic rock |      |      |      |      |      |       |      |      |      |      |      |      |      |      |      |                |  |  |  |  |  |  |
| Reference | Sun et al., 2007        |      |      |      |      |      |       |      |      |      |      |      |      |      |      |      |                |  |  |  |  |  |  |
| Age(Ma)   |                         |      |      |      |      |      |       |      |      |      |      |      |      |      |      |      |                |  |  |  |  |  |  |
| Ga        |                         |      |      |      |      |      |       |      |      |      |      |      |      |      |      |      |                |  |  |  |  |  |  |
| Ge        |                         |      |      |      |      |      |       |      |      |      |      |      |      |      |      |      |                |  |  |  |  |  |  |
| Rb        | 2.38                    | 5.65 | 5.62 | 2.84 | 9.00 | 4.37 | 1.94  | 3.58 | 1.79 | 1.35 | 5.75 | 20.5 | 3.83 | 3.05 | 5.18 | 12.0 |                |  |  |  |  |  |  |
| Sr        | 350                     | 274  | 225  | 221  | 346  | 280  | 402   | 247  | 238  | 354  | 258  | 391  | 313  | 449  | 292  | 239  |                |  |  |  |  |  |  |
| Y         | 30.1                    | 32.8 | 32.2 | 32.4 | 31.6 | 54.9 | 30.3  | 40.1 | 36.8 | 41.8 | 35.2 | 29.9 | 28.9 | 28.5 | 23.0 | 28.3 |                |  |  |  |  |  |  |
| Zr        | 109                     | 121  | 122  | 77.0 | 93.0 | 193  | 87.0  | 129  | 117  | 135  | 111  | 80.0 | 82.0 | 79.0 | 63.0 | 78.0 |                |  |  |  |  |  |  |
| Nb        | 2.64                    | 2.92 | 2.92 | 1.82 | 2.65 | 4.84 | 2.48  | 3.42 | 3.13 | 3.44 | 3.35 | 2.31 | 2.34 | 2.28 | 1.74 | 2.35 |                |  |  |  |  |  |  |
| Sn        |                         |      |      |      |      |      |       |      |      |      |      |      |      |      |      |      |                |  |  |  |  |  |  |
| Cs        | 0.09                    | 0.08 | 0.13 | 0.10 | 0.17 | 0.31 | 0.05  | 0.11 | 0.04 | 0.07 | 0.07 | 0.61 | 0.07 | 0.08 | 0.13 | 0.22 |                |  |  |  |  |  |  |
| Ba        | 18.8                    | 28.6 | 33.3 | 59.4 | 265  | 140  | 75.0  | 146  | 108  | 73.5 | 201  | 287  | 107  | 110  | 103  | 236  |                |  |  |  |  |  |  |
| La        | 4.54                    | 5.05 | 4.83 | 4.38 | 6.16 | 12.7 | 6.08  | 9.22 | 8.18 | 8.75 | 9.00 | 6.13 | 6.33 | 6.06 | 4.35 | 6.46 |                |  |  |  |  |  |  |
| Ce        | 13.9                    | 15.2 | 15.0 | 12.1 | 16.8 | 33.1 | 16.6  | 23.7 | 21.2 | 23.5 | 22.7 | 15.8 | 15.9 | 15.6 | 11.6 | 16.8 |                |  |  |  |  |  |  |
| Pr        | 2.33                    | 2.51 | 2.47 | 2.03 | 2.64 | 5.00 | 2.67  | 3.62 | 3.25 | 3.65 | 3.43 | 2.42 | 2.41 | 2.41 | 1.83 | 2.59 |                |  |  |  |  |  |  |
| Nd        | 12.1                    | 13.2 | 12.9 | 10.8 | 13.7 | 25.0 | 13.9  | 18.2 | 16.8 | 18.7 | 17.0 | 12.0 | 12.1 | 12.1 | 9.60 | 13.2 |                |  |  |  |  |  |  |
| Sm        | 3.77                    | 4.23 | 4.16 | 3.70 | 4.32 | 7.66 | 4.22  | 5.66 | 5.24 | 5.82 | 5.08 | 3.66 | 3.68 | 3.67 | 3.10 | 4.15 |                |  |  |  |  |  |  |
| Eu        | 1.57                    | 1.54 | 1.45 | 1.36 | 1.57 | 2.49 | 1.46  | 1.86 | 1.76 | 2.01 | 1.60 | 1.33 | 1.32 | 1.38 | 1.17 | 1.50 |                |  |  |  |  |  |  |
| Gd        | 4.98                    | 5.23 | 5.18 | 4.70 | 5.21 | 9.40 | 5.27  | 7.12 | 6.49 | 7.20 | 6.09 | 4.51 | 4.60 | 4.63 | 3.95 | 5.00 |                |  |  |  |  |  |  |
| Tb        | 0.80                    | 0.87 | 0.88 | 0.82 | 0.89 | 1.58 | 0.88  | 1.16 | 1.08 | 1.22 | 1.03 | 0.76 | 0.76 | 0.79 | 0.65 | 0.85 |                |  |  |  |  |  |  |
| Dy        | 4.99                    | 5.56 | 5.42 | 5.30 | 5.68 | 9.95 | 5.69  | 7.43 | 7.12 | 7.85 | 6.48 | 4.74 | 4.84 | 4.89 | 4.16 | 5.44 |                |  |  |  |  |  |  |
| Ho        | 1.02                    | 1.11 | 1.11 | 1.09 | 1.15 | 2.05 | 1.17  | 1.55 | 1.44 | 1.63 | 1.34 | 0.99 | 0.98 | 0.99 | 0.84 | 1.11 |                |  |  |  |  |  |  |
| Er        | 2.98                    | 3.37 | 3.22 | 3.38 | 3.43 | 6.17 | 3.58  | 4.68 | 4.44 | 4.87 | 4.10 | 2.95 | 2.97 | 3.00 | 2.52 | 3.35 |                |  |  |  |  |  |  |
| Tm        | 0.42                    | 0.45 | 0.45 | 0.46 | 0.49 | 0.86 | 0.50  | 0.64 | 0.60 | 0.69 | 0.57 | 0.42 | 0.40 | 0.43 | 0.36 | 0.46 |                |  |  |  |  |  |  |
| Yb        | 2.68                    | 2.79 | 2.84 | 2.95 | 2.98 | 5.79 | 3.35  | 4.27 | 4.07 | 4.49 | 3.70 | 2.61 | 2.65 | 2.72 | 2.36 | 3.06 |                |  |  |  |  |  |  |
| Lu        | 0.38                    | 0.42 | 0.42 | 0.45 | 0.45 | 0.82 | 0.47  | 0.64 | 0.59 | 0.66 | 0.55 | 0.39 | 0.39 | 0.40 | 0.34 | 0.45 |                |  |  |  |  |  |  |
| Hf        | 2.67                    | 3.02 | 2.89 | 2.03 | 2.54 | 5.14 | 2.67  | 3.72 | 3.50 | 3.94 | 3.34 | 2.02 | 2.04 | 2.19 | 1.81 | 2.49 |                |  |  |  |  |  |  |
| Ta        | 0.21                    | 0.22 | 0.21 | 0.13 | 0.19 | 0.37 | 0.19  | 0.26 | 0.23 | 0.26 | 0.23 | 0.17 | 0.17 | 0.17 | 0.15 | 0.18 |                |  |  |  |  |  |  |

**Table S3: Continued**

| Location                            |                         |      |      |          |      |      |       |      |      |      |          |      |      |      |      | Yanbian basalt |
|-------------------------------------|-------------------------|------|------|----------|------|------|-------|------|------|------|----------|------|------|------|------|----------------|
| Sample                              | YB18                    | YB19 | YB20 | YB21     | YB22 | YB23 | B23-2 | YB24 | YB25 | YB26 | YB29     | YB31 | YB32 | YB33 | YB34 | YB36           |
| Rock type                           | Sub alkaline mafic rock |      |      |          |      |      |       |      |      |      |          |      |      |      |      |                |
| Reference                           | Sun et al., 2007        |      |      |          |      |      |       |      |      |      |          |      |      |      |      |                |
| Age(Ma)                             |                         |      |      |          |      |      |       |      |      |      |          |      |      |      |      |                |
| Pb                                  | 1.14                    | 1.17 | 0.77 | 0.76     | 1.83 | 2.81 | 1.71  | 1.98 | 1.18 | 3.27 | 3.27     | 2.45 | 0.88 | 1.75 | 2.15 | 1.14           |
| Th                                  | 0.20                    | 0.25 | 0.36 | 0.31     | 0.41 | 1.15 | 0.31  | 1.13 | 0.81 | 0.83 | 0.64     | 0.32 | 0.37 | 0.52 | 0.47 | 0.61           |
| U                                   | 0.22                    | 0.36 | 0.60 | 0.51     | 0.44 | 0.53 | 0.21  | 0.75 | 0.54 | 0.42 | 0.27     | 0.42 | 0.55 | 0.74 | 0.82 | 0.77           |
| Isotopic date                       |                         |      |      |          |      |      |       |      |      |      |          |      |      |      |      |                |
| $^{87}\text{Sr}/^{86}\text{Sr}$ (t) | 0.703284                |      |      | 0.703509 |      |      |       |      |      |      | 0.703638 |      |      |      |      | 0.704026       |
| $\epsilon_{\text{Nd}}$ (t)          | 7.85                    |      |      | 4.21     |      |      |       |      |      |      | 3.81     |      |      |      |      | 3.96           |
| Ratio                               |                         |      |      |          |      |      |       |      |      |      |          |      |      |      |      |                |
| Mg#                                 | 55.7                    | 58.6 | 59.1 | 54.6     | 54.9 | 51.8 | 56.1  | 52.7 | 57.2 | 53.6 | 55.9     | 60.6 | 57.5 | 56.7 | 59.9 | 58.5           |
| Sr/Y                                | 11.6                    | 8.35 | 6.99 | 6.82     | 10.9 | 5.10 | 13.3  | 6.16 | 6.47 | 8.47 | 7.33     | 13.1 | 10.8 | 15.8 | 12.7 | 8.45           |
| Nb/La                               | 0.58                    | 0.58 | 0.60 | 0.42     | 0.43 | 0.38 | 0.41  | 0.37 | 0.38 | 0.39 | 0.37     | 0.38 | 0.37 | 0.38 | 0.40 | 0.36           |
| Nb/U                                | 12.0                    | 8.11 | 4.87 | 3.57     | 6.02 | 9.13 | 11.8  | 4.56 | 5.80 | 8.19 | 12.4     | 5.50 | 4.25 | 3.08 | 2.12 | 3.05           |



Table S3: Continued

| Location                         |       |       |       |       |       |       |       |       |       |       |        |       |       |       |       |       |
|----------------------------------|-------|-------|-------|-------|-------|-------|-------|-------|-------|-------|--------|-------|-------|-------|-------|-------|
| Sample                           | YB37  | YB38  | E3    | E4    | E5    | E7    | E9    | E11   | E12   | H1    | H3     | H4    | H5    | H6    | T4    | T5    |
| Rock type                        |       |       |       |       |       |       |       |       |       |       |        |       |       |       |       |       |
| Reference                        |       |       |       |       |       |       |       |       |       |       |        |       |       |       |       |       |
| Age(Ma)                          |       |       |       |       |       |       |       |       |       |       |        |       |       |       |       |       |
| Major(wt.%)                      |       |       |       |       |       |       |       |       |       |       |        |       |       |       |       |       |
| SiO <sub>2</sub>                 | 46.82 | 48.16 | 45.18 | 46.49 | 44.07 | 48.10 | 45.41 | 48.33 | 47.13 | 45.51 | 46.52  | 47.24 | 47.29 | 47.70 | 44.82 | 46.98 |
| TiO <sub>2</sub>                 | 2.80  | 1.80  | 1.99  | 1.78  | 2.84  | 1.46  | 2.31  | 1.36  | 1.30  | 1.81  | 1.97   | 1.73  | 2.37  | 2.34  | 2.06  | 2.00  |
| Al <sub>2</sub> O <sub>3</sub>   | 12.54 | 13.77 | 14.92 | 14.39 | 13.63 | 14.62 | 13.11 | 14.67 | 15.67 | 15.14 | 14.39  | 15.20 | 12.83 | 12.90 | 15.59 | 15.69 |
| Fe <sub>2</sub> O <sub>3</sub> T | 15.85 | 13.84 | 12.58 | 12.36 | 14.78 | 12.48 | 15.73 | 13.27 | 11.78 | 11.02 | 13.74  | 12.84 | 15.37 | 15.96 | 12.67 | 11.16 |
| Fe <sub>2</sub> O <sub>3</sub>   |       |       |       |       |       |       |       |       |       |       |        |       |       |       |       |       |
| FeO                              |       |       |       |       |       |       |       |       |       |       |        |       |       |       |       |       |
| MnO                              | 0.23  | 0.22  | 0.14  | 0.18  | 0.21  | 0.17  | 0.25  | 0.23  | 0.19  | 0.16  | 0.21   | 0.20  | 0.22  | 0.24  | 0.20  | 0.17  |
| MgO                              | 4.99  | 6.01  | 6.61  | 6.92  | 7.20  | 7.24  | 6.29  | 6.58  | 6.49  | 5.71  | 6.86   | 7.12  | 5.02  | 5.68  | 7.36  | 6.52  |
| CaO                              | 11.40 | 9.77  | 12.02 | 11.56 | 11.29 | 7.97  | 11.49 | 10.00 | 12.79 | 15.72 | 11.15  | 10.00 | 10.62 | 9.62  | 10.05 | 12.22 |
| Na <sub>2</sub> O                | 2.42  | 3.10  | 3.01  | 3.04  | 2.70  | 2.86  | 3.00  | 3.98  | 1.84  | 2.22  | 2.16   | 2.70  | 2.56  | 3.20  | 2.68  | 1.69  |
| K <sub>2</sub> O                 | 0.28  | 0.35  | 0.19  | 0.15  | 0.13  | 0.78  | 0.19  | 0.31  | 0.09  | 0.05  | 0.29   | 0.15  | 0.36  | 0.30  | 0.31  | 0.33  |
| P <sub>2</sub> O <sub>5</sub>    | 0.40  | 0.28  | 0.24  | 0.24  | 0.31  | 0.19  | 0.27  | 0.16  | 0.13  | 0.17  | 0.22   | 0.18  | 0.28  | 0.26  | 0.20  | 0.22  |
| LOI                              | 1.92  | 2.62  | 3.01  | 2.83  | 2.79  | 3.41  | 1.68  | 0.87  | 2.39  | 2.33  | 2.49   | 2.21  | 1.87  | 1.78  | 4.05  | 2.67  |
| TOL                              | 99.64 | 99.94 | 99.89 | 99.93 | 99.96 | 99.28 | 99.73 | 99.75 | 99.80 | 99.83 | 100.00 | 99.58 | 98.80 | 99.98 | 99.99 | 99.66 |
| Trace(ppm)                       |       |       |       |       |       |       |       |       |       |       |        |       |       |       |       |       |
| Li                               |       |       |       |       |       |       |       |       |       |       |        |       |       |       |       |       |
| Be                               |       |       |       |       |       |       |       |       |       |       |        |       |       |       |       |       |
| Sc                               | 44.1  | 40.7  | 41.3  | 35.4  | 36.2  | 39.0  | 48.7  | 41.4  | 39.8  | 34.6  | 41.5   | 35.5  | 43.4  | 45.1  | 36.6  | 35.9  |
| V                                | 415   | 383   | 415   | 355   | 443   | 354   | 547   | 374   | 331   | 343   | 377    | 347   | 487   | 490   | 339   | 311   |
| Cr                               | 112   | 93.0  | 213   | 201   | 141   | 161   | 134   | 69.0  | 175   | 97.0  | 169    | 150   | 60.0  | 80.0  | 173   | 93.0  |
| Co                               | 37.7  | 37.5  | 50.4  | 49.9  | 67.2  | 52.8  | 50.9  | 52.1  | 59.7  | 60.7  | 50.9   | 55.0  | 57.5  | 60.5  | 53.0  | 58.9  |
| Ni                               | 35.9  | 30.4  | 77.2  | 70.9  | 76.6  | 67.1  | 53.4  | 43.5  | 58.2  | 81.2  | 60.4   | 70.1  | 45.9  | 45.2  | 87.3  | 68.1  |
| Cu                               | 69.2  | 79.6  | 73.5  | 61.9  | 57.9  | 3.10  | 53.6  | 71.4  | 67.8  | 81.6  | 77.6   | 90.3  | 72.6  | 73.0  | 63.5  | 68.3  |
| Zn                               | 119   | 114   | 96.0  | 114   | 142   | 131   | 152   | 137   | 105   | 110   | 123    | 144   | 152   | 146   | 100   | 121   |

Table S3: Continued

| Location  |      |      |      |      |      |      |      |      |      |      |      |      |      |      |      |      |
|-----------|------|------|------|------|------|------|------|------|------|------|------|------|------|------|------|------|
| Sample    | YB37 | YB38 | E3   | E4   | E5   | E7   | E9   | E11  | E12  | H1   | H3   | H4   | H5   | H6   | T4   | T5   |
| Rock type |      |      |      |      |      |      |      |      |      |      |      |      |      |      |      |      |
| Reference |      |      |      |      |      |      |      |      |      |      |      |      |      |      |      |      |
| Age(Ma)   |      |      |      |      |      |      |      |      |      |      |      |      |      |      |      |      |
| Ga        |      |      |      |      |      |      |      |      |      |      |      |      |      |      |      |      |
| Ge        |      |      |      |      |      |      |      |      |      |      |      |      |      |      |      |      |
| Rb        | 1.93 | 4.10 | 2.74 | 2.32 | 2.31 | 18.4 | 2.85 | 4.51 | 2.20 | 2.10 | 3.82 | 2.93 | 14.1 | 4.83 | 5.53 | 5.52 |
| Sr        | 246  | 333  | 421  | 299  | 406  | 293  | 194  | 283  | 322  | 842  | 221  | 267  | 259  | 233  | 268  | 375  |
| Y         | 33.4 | 33.4 | 38.6 | 34.1 | 41.5 | 33.1 | 48.6 | 34.1 | 29.0 | 26.6 | 38.8 | 32.5 | 54.2 | 54.7 | 29.1 | 25.2 |
| Zr        | 94.0 | 97.0 | 111  | 117  | 169  | 88.0 | 113  | 100  | 66.0 | 143  | 122  | 82.0 | 166  | 154  | 131  | 149  |
| Nb        | 3.02 | 2.82 | 3.34 | 3.83 | 3.93 | 2.71 | 2.54 | 2.65 | 2.65 | 4.35 | 3.32 | 2.32 | 4.74 | 4.31 | 4.95 | 6.29 |
| Sn        |      |      |      |      |      |      |      |      |      |      |      |      |      |      |      |      |
| Cs        | 0.11 | 0.24 | 0.09 | 0.09 | 0.15 | 0.19 | 0.11 | 0.20 | 0.09 | 0.11 | 0.19 | 0.20 | 2.56 | 0.39 | 0.15 | 0.19 |
| Ba        | 111  | 162  | 85.8 | 68.0 | 57.6 | 508  | 62.9 | 228  | 30.8 | 12.3 | 131  | 70.0 | 196  | 169  | 118  | 35.9 |
| La        | 8.00 | 8.09 | 8.05 | 8.11 | 7.59 | 7.56 | 7.25 | 9.37 | 5.82 | 6.80 | 7.93 | 5.87 | 11.8 | 10.7 | 7.31 | 8.89 |
| Ce        | 20.5 | 21.2 | 22.4 | 22.0 | 23.2 | 20.1 | 20.5 | 23.5 | 14.1 | 21.5 | 20.6 | 15.4 | 28.6 | 28.1 | 19.7 | 24.8 |
| Pr        | 3.14 | 3.18 | 3.05 | 3.05 | 3.43 | 2.69 | 3.26 | 3.35 | 2.14 | 3.10 | 2.92 | 2.35 | 4.23 | 3.99 | 3.13 | 3.41 |
| Nd        | 16.0 | 16.1 | 15.9 | 16.4 | 18.7 | 14.5 | 18.6 | 15.3 | 11.3 | 15.2 | 16.5 | 12.7 | 21.2 | 20.5 | 16.3 | 17.0 |
| Sm        | 4.83 | 4.83 | 5.19 | 4.77 | 5.84 | 4.50 | 5.65 | 4.38 | 3.45 | 4.65 | 5.00 | 3.96 | 6.83 | 6.19 | 4.74 | 4.72 |
| Eu        | 1.73 | 1.71 | 1.83 | 1.88 | 2.38 | 1.55 | 2.26 | 1.53 | 1.30 | 1.72 | 1.85 | 1.41 | 2.32 | 2.19 | 1.77 | 1.75 |
| Gd        | 5.92 | 5.95 | 6.64 | 6.30 | 7.16 | 5.29 | 7.26 | 5.32 | 4.20 | 5.21 | 5.96 | 4.94 | 7.93 | 7.35 | 5.09 | 5.01 |
| Tb        | 0.98 | 1.00 | 0.95 | 0.99 | 1.25 | 0.77 | 1.17 | 0.80 | 0.66 | 0.73 | 0.89 | 0.74 | 1.25 | 1.21 | 0.78 | 0.75 |
| Dy        | 6.33 | 6.30 | 7.07 | 6.62 | 7.69 | 5.79 | 8.39 | 6.44 | 4.53 | 5.02 | 6.82 | 5.39 | 8.87 | 8.95 | 5.59 | 4.97 |
| Ho        | 1.28 | 1.30 | 1.44 | 1.30 | 1.52 | 1.15 | 1.77 | 1.25 | 0.93 | 0.98 | 1.50 | 1.08 | 1.91 | 1.74 | 1.05 | 0.93 |
| Er        | 3.88 | 3.89 | 3.83 | 3.38 | 4.07 | 3.22 | 4.91 | 3.67 | 2.89 | 2.69 | 4.17 | 3.10 | 5.14 | 5.23 | 3.00 | 2.64 |
| Tm        | 0.53 | 0.54 | 0.57 | 0.54 | 0.61 | 0.48 | 0.79 | 0.49 | 0.40 | 0.38 | 0.60 | 0.46 | 0.79 | 0.74 | 0.44 | 0.38 |
| Yb        | 3.53 | 3.53 | 3.95 | 3.18 | 3.80 | 2.83 | 4.92 | 3.42 | 2.60 | 2.38 | 3.72 | 3.07 | 4.96 | 4.35 | 2.57 | 2.40 |
| Lu        | 0.53 | 0.52 | 0.58 | 0.50 | 0.57 | 0.43 | 0.72 | 0.54 | 0.39 | 0.38 | 0.54 | 0.45 | 0.76 | 0.70 | 0.42 | 0.34 |
| Hf        | 2.83 | 2.84 | 3.33 | 3.07 | 4.37 | 2.57 | 3.40 | 2.74 | 2.11 | 3.59 | 3.37 | 2.43 | 4.66 | 4.71 | 3.45 | 3.93 |
| Ta        | 0.22 | 0.21 | 0.24 | 0.24 | 0.29 | 0.20 | 0.19 | 0.17 | 0.16 | 0.32 | 0.22 | 0.14 | 0.28 | 0.29 | 0.35 | 0.44 |

**Table S3: Continued**

| Location                            |      |      |      |      |      |      |      |      |      |      |      |      |      |      |      |      |
|-------------------------------------|------|------|------|------|------|------|------|------|------|------|------|------|------|------|------|------|
| Sample                              | YB37 | YB38 | E3   | E4   | E5   | E7   | E9   | E11  | E12  | H1   | H3   | H4   | H5   | H6   | T4   | T5   |
| Rock type                           |      |      |      |      |      |      |      |      |      |      |      |      |      |      |      |      |
| Reference                           |      |      |      |      |      |      |      |      |      |      |      |      |      |      |      |      |
| Age(Ma)                             |      |      |      |      |      |      |      |      |      |      |      |      |      |      |      |      |
| Pb                                  | 2.37 | 1.76 | 0.64 | 1.91 | 2.23 | 5.68 | 1.64 | 12.6 | 11.0 | 1.32 | 1.56 | 1.29 | 3.72 | 2.38 | 1.19 | 1.20 |
| Th                                  | 0.65 | 0.55 | 0.29 | 0.33 | 0.27 | 0.99 | 0.55 | 1.47 | 0.56 | 0.24 | 0.53 | 0.28 | 0.83 | 0.83 | 0.28 | 0.34 |
| U                                   | 0.72 | 0.47 | 0.11 | 0.14 | 0.11 | 0.28 | 0.18 | 0.51 | 0.17 | 0.12 | 0.15 | 0.11 | 0.22 | 0.19 | 0.11 | 0.17 |
| Isotopic date                       |      |      |      |      |      |      |      |      |      |      |      |      |      |      |      |      |
| $^{87}\text{Sr}/^{86}\text{Sr}$ (t) |      |      |      |      |      |      |      |      |      |      |      |      |      |      |      |      |
| $\epsilon_{\text{Nd}}$ (t)          |      |      |      |      |      |      |      |      |      |      |      |      |      |      |      |      |
| Ratio                               |      |      |      |      |      |      |      |      |      |      |      |      |      |      |      |      |
| Mg#                                 | 42.3 | 50.3 | 55.0 | 56.6 | 53.2 | 57.5 | 48.2 | 53.6 | 56.2 | 54.7 | 53.8 | 56.4 | 43.2 | 45.3 | 57.5 | 57.7 |
| Sr/Y                                | 7.37 | 9.97 | 10.9 | 8.77 | 9.78 | 8.85 | 3.99 | 8.30 | 11.1 | 31.7 | 5.70 | 8.22 | 4.78 | 4.26 | 9.21 | 14.9 |
| Nb/La                               | 0.38 | 0.35 | 0.41 | 0.47 | 0.52 | 0.36 | 0.35 | 0.28 | 0.46 | 0.64 | 0.42 | 0.40 | 0.40 | 0.40 | 0.68 | 0.71 |
| Nb/U                                | 4.19 | 6.00 | 30.4 | 27.4 | 35.7 | 9.68 | 14.1 | 5.20 | 15.6 | 36.3 | 22.1 | 21.1 | 21.5 | 22.7 | 45.0 | 37.0 |

[illegible]

Table S3: Continued

| Location  |                         |        |        |        |      |        |        |      |      |      |      |      |      |      |       |       |
|-----------|-------------------------|--------|--------|--------|------|--------|--------|------|------|------|------|------|------|------|-------|-------|
| Sample    | T6                      | YB12-4 | YB16-1 | YB16-3 | YB18 | YB21-2 | YB21-6 | YB22 | YB27 | YB30 | YB41 | YB43 | LQW3 | LQW5 | LQWS8 | LQWI0 |
| Rock type | Sub alkaline mafic rock |        |        |        |      |        |        |      |      |      |      |      |      |      |       |       |
| Reference | Li et al., 2006         |        |        |        |      |        |        |      |      |      |      |      |      |      |       |       |
| Age(Ma)   |                         |        |        |        |      |        |        |      |      |      |      |      | 805  |      |       |       |
| Ga        |                         | 15.2   | 21.1   | 20.6   | 19.1 | 18.0   | 17.8   | 20.9 | 19.8 | 19.7 | 19.9 | 21.3 |      |      |       |       |
| Ge        |                         |        |        |        |      |        |        |      |      |      |      |      |      |      |       |       |
| Rb        | 15.1                    | 4.22   | 27.7   | 22.7   | 2.62 | 5.22   | 3.71   | 1.81 | 2.61 | 2.84 | 0.55 | 4.43 | 28.3 | 20.4 | 46.4  | 28.8  |
| Sr        | 413                     | 491    | 1050   | 971    | 205  | 342    | 317    | 186  | 346  | 471  | 448  | 373  | 194  | 181  | 179   | 228   |
| Y         | 27.0                    | 10.1   | 13.6   | 12.4   | 37.0 | 33.8   | 24.0   | 43.6 | 28.4 | 27.3 | 35.0 | 31.7 | 45.7 | 44.2 | 49.7  | 46.0  |
| Zr        | 155                     | 78.4   | 118    | 86.8   | 114  | 105    | 89.0   | 162  | 155  | 123  | 123  | 166  | 137  | 141  | 220   | 187   |
| Nb        | 6.53                    | 2.62   | 3.81   | 2.20   | 2.96 | 2.90   | 2.14   | 4.13 | 5.52 | 4.09 | 3.74 | 5.57 | 4.55 | 4.42 | 8.74  | 10.8  |
| Sn        |                         |        |        |        |      |        |        |      |      |      |      |      |      |      |       |       |
| Cs        | 0.30                    |        |        |        |      |        |        |      |      |      |      |      | 8.63 | 3.14 | 9.74  | 7.55  |
| Ba        | 39.6                    | 179    | 704    | 423    | 60.4 | 140    | 47.0   | 109  | 40.7 | 25.7 | 25.3 | 50.2 | 180  | 269  | 442   | 479   |
| La        | 8.85                    | 12.9   | 22.1   | 14.2   | 6.13 | 7.00   | 3.16   | 7.15 | 8.21 | 6.37 | 5.19 | 8.77 | 8.48 | 8.36 | 17.4  | 21.3  |
| Ce        | 25.4                    | 28.6   | 48.2   | 30.7   | 17.8 | 18.9   | 10.5   | 21.8 | 23.3 | 19.0 | 15.9 | 25.4 | 20.6 | 20.6 | 40.2  | 45.6  |
| Pr        | 3.31                    | 4.10   | 6.66   | 4.38   | 3.14 | 3.17   | 1.99   | 3.82 | 3.83 | 3.27 | 2.88 | 4.24 | 2.96 | 3.08 | 5.36  | 5.52  |
| Nd        | 16.0                    | 17.7   | 28.0   | 18.7   | 16.0 | 15.7   | 10.5   | 19.6 | 18.5 | 15.9 | 14.9 | 20.2 | 15.1 | 15.4 | 24.8  | 24.8  |
| Sm        | 4.70                    | 3.49   | 4.92   | 3.58   | 4.71 | 4.39   | 3.08   | 5.64 | 4.75 | 4.25 | 4.51 | 5.17 | 4.57 | 4.76 | 6.48  | 5.98  |
| Eu        | 1.65                    | 1.03   | 1.64   | 1.15   | 1.65 | 1.63   | 1.19   | 2.01 | 1.67 | 1.60 | 1.61 | 1.85 | 1.84 | 1.86 | 2.10  | 1.79  |
| Gd        | 5.18                    | 2.61   | 3.57   | 2.83   | 5.68 | 5.23   | 3.85   | 6.80 | 5.11 | 4.77 | 5.36 | 5.64 | 5.80 | 6.08 | 7.35  | 6.69  |
| Tb        | 0.71                    | 0.36   | 0.49   | 0.41   | 0.99 | 0.90   | 0.67   | 1.17 | 0.86 | 0.79 | 0.94 | 0.95 | 1.07 | 1.10 | 1.28  | 1.14  |
| Dy        | 5.12                    | 1.86   | 2.46   | 2.24   | 6.19 | 5.55   | 4.11   | 7.21 | 5.02 | 4.73 | 5.90 | 5.56 | 6.82 | 7.05 | 7.87  | 6.92  |
| Ho        | 0.98                    | 0.35   | 0.46   | 0.44   | 1.27 | 1.16   | 0.85   | 1.48 | 1.01 | 0.96 | 1.23 | 1.11 | 1.46 | 1.50 | 1.67  | 1.43  |
| Er        | 2.73                    | 0.91   | 1.22   | 1.17   | 3.47 | 3.08   | 2.24   | 4.00 | 2.64 | 2.56 | 3.24 | 2.97 | 4.23 | 4.41 | 4.91  | 4.32  |
| Tm        | 0.38                    | 0.13   | 0.17   | 0.17   | 0.53 | 0.46   | 0.33   | 0.59 | 0.39 | 0.38 | 0.49 | 0.43 | 0.60 | 0.61 | 0.69  | 0.59  |
| Yb        | 2.18                    | 0.75   | 1.08   | 1.03   | 3.19 | 2.67   | 1.92   | 3.54 | 2.35 | 2.30 | 3.00 | 2.61 | 3.95 | 4.02 | 4.46  | 3.90  |
| Lu        | 0.36                    | 0.12   | 0.18   | 0.17   | 0.50 | 0.37   | 0.27   | 0.54 | 0.37 | 0.36 | 0.46 | 0.41 | 0.58 | 0.59 | 0.65  | 0.56  |
| Hf        | 3.49                    | 2.15   | 3.02   | 2.26   | 3.20 | 2.87   | 2.44   | 4.24 | 3.78 | 3.25 | 3.29 | 4.18 | 3.40 | 3.64 | 4.93  | 4.41  |
| Ta        | 0.46                    | 0.15   | 0.22   | 0.13   | 0.21 | 0.19   | 0.13   | 0.25 | 0.37 | 0.29 | 0.22 | 0.39 | 0.39 | 0.33 | 0.65  | 0.78  |

Table S3: Continued

| Location                            |                         |        |        |        |      |        |        |      |      |      |      |      |          |      |       |          |
|-------------------------------------|-------------------------|--------|--------|--------|------|--------|--------|------|------|------|------|------|----------|------|-------|----------|
| Sample                              | T6                      | YB12-4 | YB16-1 | YB16-3 | YB18 | YB21-2 | YB21-6 | YB22 | YB27 | YB30 | YB41 | YB43 | LQW3     | LQW5 | LQWS8 | LQWI0    |
| Rock type                           | Sub alkaline mafic rock |        |        |        |      |        |        |      |      |      |      |      |          |      |       |          |
| Reference                           | Li et al., 2006         |        |        |        |      |        |        |      |      |      |      |      |          |      |       |          |
| Age(Ma)                             | 805                     |        |        |        |      |        |        |      |      |      |      |      |          |      |       |          |
| Pb                                  | 1.14                    | 5.99   | 6.31   | 5.12   | 1.36 | 2.04   | 2.68   | 1.97 | 1.21 | 1.05 | 2.76 | 1.82 | 12.8     | 12.8 | 9.56  | 17.0     |
| Th                                  | 0.37                    | 2.28   | 2.41   | 2.99   | 0.25 | 0.35   | 0.12   | 0.25 | 0.31 | 0.22 | 0.18 | 0.32 | 0.54     | 0.58 | 1.77  | 2.69     |
| U                                   | 0.17                    | 0.45   | 0.55   | 0.66   | 0.08 | 0.15   | 0.03   | 0.11 | 0.15 | 0.11 | 0.09 | 0.15 | 0.15     | 0.24 | 0.33  | 0.37     |
| Isotopic date                       |                         |        |        |        |      |        |        |      |      |      |      |      |          |      |       |          |
| $^{87}\text{Sr}/^{86}\text{Sr}$ (t) |                         |        |        |        |      |        |        |      |      |      |      |      | 0.704130 |      |       | 0.707765 |
| $\epsilon_{\text{Nd}}$ (t)          |                         | 1.70   | 3.40   | 4.50   | 7.30 | 5.70   | 10.70  | 9.40 | 8.40 | 8.80 | 8.9  | 8.2  | 2.63     |      |       | -2.50    |
| Ratio                               |                         |        |        |        |      |        |        |      |      |      |      |      |          |      |       |          |
| Mg#                                 | 57.4                    | 71.4   | 50.1   | 54.3   | 57.0 | 55.9   | 65.7   | 54.5 | 61.1 | 61.0 | 49.6 | 56.5 | 55.4     | 56.2 | 52.8  | 57.2     |
| Sr/Y                                | 15.3                    | 48.6   | 77.0   | 78.3   | 5.54 | 10.1   | 13.2   | 4.27 | 12.2 | 17.3 | 12.8 | 11.8 | 4.25     | 4.09 | 3.60  | 4.96     |
| Nb/La                               | 0.74                    | 0.20   | 0.17   | 0.15   | 0.48 | 0.41   | 0.68   | 0.58 | 0.67 | 0.64 | 0.72 | 0.64 | 0.54     | 0.53 | 0.50  | 0.51     |
| Nb/U                                | 38.4                    | 5.82   | 6.93   | 3.33   | 37.0 | 19.3   | 71.3   | 37.5 | 36.8 | 37.2 | 41.6 | 37.1 | 30.3     | 18.4 | 26.5  | 29.2     |

Table S3: Continued

| Dengxiangying dike             |                         |        |        |       |       |       |        |       |       |       |       |       |       |       |       |       |
|--------------------------------|-------------------------|--------|--------|-------|-------|-------|--------|-------|-------|-------|-------|-------|-------|-------|-------|-------|
| Location                       |                         |        |        |       |       |       |        |       |       |       |       |       |       |       |       |       |
| Sample                         | LQWI12                  | LQWI15 | LQWI17 | LQW19 | LQW20 | LQW22 | LQW24  | LQW25 | LQW27 | LQW28 | LQW29 | XF-06 | TJ-01 | TJ-03 | TJ-04 | TJ-05 |
| Rock type                      | Sub alkaline mafic rock |        |        |       |       |       |        |       |       |       |       |       |       |       |       |       |
| Reference                      | Li and Zhao, 2018       |        |        |       |       |       |        |       |       |       |       |       |       |       |       |       |
| Age(Ma)                        |                         |        |        |       |       |       |        |       |       |       |       |       |       |       |       |       |
| Major(wt.%)                    |                         |        |        |       |       |       |        |       |       |       |       |       |       |       |       |       |
| SiO <sub>2</sub>               | 46.98                   | 46.66  | 52.29  | 52.61 | 47.12 | 39.47 | 54.00  | 47.99 | 44.83 | 43.72 | 42.20 | 43.76 | 45.95 | 44.61 | 46.27 | 43.21 |
| TiO <sub>2</sub>               | 3.16                    | 2.05   | 1.92   | 1.71  | 1.98  | 3.40  | 1.65   | 2.80  | 1.71  | 2.24  | 2.31  | 2.92  | 2.08  | 2.23  | 2.20  | 1.57  |
| Al <sub>2</sub> O <sub>3</sub> | 14.58                   | 15.42  | 13.08  | 15.36 | 15.09 | 15.45 | 14.07  | 16.97 | 15.96 | 17.55 | 15.92 | 14.21 | 14.81 | 15.57 | 15.30 | 16.55 |
| Fe2O3T                         | 15.35                   | 12.60  | 10.32  | 10.67 | 13.09 | 20.14 | 14.53  | 18.09 | 12.06 | 19.65 | 14.67 | 14.88 | 11.74 | 12.29 | 11.60 | 11.31 |
| Fe <sub>2</sub> O <sub>3</sub> |                         |        |        |       |       |       |        |       |       |       |       |       |       |       |       |       |
| FeO                            |                         |        |        |       |       |       |        |       |       |       |       |       |       |       |       |       |
| MnO                            | 0.21                    | 0.09   | 0.12   | 0.15  | 0.18  | 0.22  | 0.15   | 0.08  | 0.17  | 0.17  | 0.24  | 0.20  | 0.18  | 0.18  | 0.17  | 0.16  |
| MgO                            | 6.22                    | 9.70   | 12.48  | 5.04  | 7.81  | 10.59 | 8.52   | 5.67  | 5.47  | 7.36  | 5.91  | 6.97  | 6.98  | 7.27  | 7.06  | 9.48  |
| CaO                            | 5.32                    | 4.86   | 3.03   | 7.52  | 7.51  | 2.51  | 0.44   | 0.43  | 6.92  | 0.88  | 7.03  | 10.35 | 10.32 | 9.47  | 9.18  | 9.48  |
| Na <sub>2</sub> O              | 2.89                    | 2.28   | 0.49   | 2.35  | 1.72  | 0.02  | 0.03   | 0.19  | 0.88  | 0.21  | 1.44  | 1.89  | 3.28  | 3.25  | 3.49  | 2.66  |
| K <sub>2</sub> O               | 1.34                    | 1.01   | 0.89   | 1.95  | 1.58  | 0.02  | 0.87   | 1.54  | 1.81  | 0.94  | 0.64  | 0.12  | 0.38  | 0.38  | 0.42  | 0.15  |
| P <sub>2</sub> O <sub>5</sub>  | 0.31                    | 0.18   | 0.28   | 0.20  | 0.20  | 0.39  | 0.16   | 0.25  | 0.25  | 0.24  | 0.22  | 0.36  | 0.20  | 0.22  | 0.22  | 0.16  |
| LOI                            | 3.46                    | 5.11   | 5.02   | 1.89  | 2.96  | 7.15  | 5.70   | 5.26  | 9.54  | 6.63  | 9.37  | 3.57  | 3.17  | 3.36  | 3.12  | 4.41  |
| TOL                            | 99.81                   | 99.96  | 99.91  | 99.45 | 99.24 | 99.36 | 100.11 | 99.25 | 99.61 | 99.59 | 99.96 | 99.23 | 99.09 | 98.83 | 99.03 | 99.14 |
| Trace(ppm)                     |                         |        |        |       |       |       |        |       |       |       |       |       |       |       |       |       |
| Li                             |                         |        |        |       |       |       |        |       |       |       |       |       |       |       |       |       |
| Be                             |                         |        |        |       |       |       |        |       |       |       |       |       |       |       |       |       |
| Sc                             | 45.6                    | 44.1   | 27.4   | 38.3  | 40.1  | 45.5  | 35.3   | 46.6  | 39.1  | 46.8  | 44.8  | 42.0  | 37.1  | 38.6  | 37.8  | 28.4  |
| V                              | 396                     | 291    | 215    | 293   | 295   | 365   | 260    | 384   | 294   | 303   | 305   | 444   | 351   | 371   | 361   | 267   |
| Cr                             | 88.6                    | 211    | 281    | 38.9  | 152   | 144   | 117    | 150   | 157   | 280   | 228   | 291   | 170   | 134   | 137   | 133   |
| Co                             | 43.0                    | 44.1   | 32.5   | 32.6  | 34.4  | 51.3  | 47.8   | 56.2  | 43.5  | 59.8  | 53.6  | 51.1  | 44.6  | 47.8  | 45.0  | 54.5  |
| Ni                             | 31.9                    | 31.2   | 58.0   | 16.1  | 41.3  | 48.4  | 36.2   | 34.7  | 46.0  | 43.7  | 31.0  | 63.5  | 61.9  | 47.2  | 47.0  | 118   |
| Cu                             |                         |        |        |       |       |       |        |       |       |       |       | 58.2  | 65.4  | 64.4  | 61.3  | 51.5  |
| Zn                             |                         |        |        |       |       |       |        |       |       |       |       | 131   | 92.6  | 99.9  | 92.2  | 77.1  |

Table S3: Continued

| Dengxiangying dike |                         |        |        |       |       |       |       |       |       |       |       |       |       |       |       |       |
|--------------------|-------------------------|--------|--------|-------|-------|-------|-------|-------|-------|-------|-------|-------|-------|-------|-------|-------|
| Location           |                         |        |        |       |       |       |       |       |       |       |       |       |       |       |       |       |
| Sample             | LQWI12                  | LQWI15 | LQWI17 | LQW19 | LQW20 | LQW22 | LQW24 | LQW25 | LQW27 | LQW28 | LQW29 | XF-06 | TJ-01 | TJ-03 | TJ-04 | TJ-05 |
| Rock type          | Sub alkaline mafic rock |        |        |       |       |       |       |       |       |       |       |       |       |       |       |       |
| Reference          | Li and Zhao, 2018       |        |        |       |       |       |       |       |       |       |       |       |       |       |       |       |
| Age(Ma)            |                         |        |        |       |       |       |       |       |       |       |       |       |       |       |       |       |
| Ga                 |                         |        |        |       |       |       |       |       |       |       |       | 21.1  | 19.0  | 20.2  | 18.0  | 15.8  |
| Ge                 |                         |        |        |       |       |       |       |       |       |       |       |       |       |       |       |       |
| Rb                 | 38.7                    | 45.1   | 36.6   | 113   | 88.7  | 2.65  | 56.2  | 76.0  | 95.4  | 44.3  | 31.4  | 1.13  | 3.99  | 4.20  | 4.50  | 1.81  |
| Sr                 | 208                     | 126    | 48.1   | 201   | 162   | 15.5  | 9.47  | 31.3  | 160   | 34.6  | 151   | 367   | 412   | 389   | 378   | 347   |
| Y                  | 53.7                    | 37.8   | 33.1   | 38.5  | 40.7  | 70.0  | 34.3  | 29.9  | 41.0  | 26.4  | 41.1  | 45.7  | 27.3  | 29.3  | 29.4  | 18.3  |
| Zr                 | 249                     | 139    | 174    | 220   | 145   | 260   | 130   | 184   | 122   | 145   | 155   | 207   | 136   | 151   | 147   | 94.5  |
| Nb                 | 10.2                    | 3.69   | 8.90   | 10.6  | 7.92  | 13.6  | 3.77  | 5.75  | 4.72  | 4.43  | 4.44  | 4.34  | 3.70  | 4.34  | 4.11  | 3.06  |
| Sn                 |                         |        |        |       |       |       |       |       |       |       |       |       |       |       |       |       |
| Cs                 | 3.33                    | 12.4   | 4.74   | 26.4  | 33.0  | 0.43  | 3.64  | 7.64  | 8.30  | 3.33  | 2.92  | 0.12  | 0.07  | 0.08  | 0.07  | 0.12  |
| Ba                 | 815                     | 453    | 785    | 548   | 460   | 22.7  | 107   | 158   | 174   | 119   | 76.3  | 58.4  | 196   | 118   | 153   | 34.4  |
| La                 | 21.4                    | 7.07   | 16.3   | 25.2  | 8.69  | 22.6  | 14.9  | 5.71  | 6.46  | 4.61  | 9.62  | 8.24  | 6.32  | 7.17  | 6.87  | 5.02  |
| Ce                 | 48.9                    | 17.8   | 38.1   | 55.9  | 21.0  | 56.7  | 36.3  | 15.5  | 16.0  | 11.5  | 23.9  | 24.9  | 18.4  | 19.8  | 19.5  | 13.8  |
| Pr                 | 6.06                    | 2.60   | 4.72   | 6.75  | 3.01  | 6.90  | 4.75  | 2.05  | 2.20  | 1.52  | 3.25  | 4.08  | 2.94  | 3.26  | 3.10  | 2.28  |
| Nd                 | 27.8                    | 13.3   | 21.5   | 28.5  | 15.3  | 32.3  | 21.1  | 10.3  | 11.6  | 7.95  | 16.3  | 23.0  | 15.7  | 18.0  | 17.5  | 12.0  |
| Sm                 | 7.14                    | 3.97   | 5.12   | 6.17  | 4.63  | 8.24  | 4.85  | 3.20  | 3.70  | 2.78  | 4.80  | 7.16  | 4.55  | 5.13  | 5.18  | 3.26  |
| Eu                 | 2.16                    | 1.55   | 1.21   | 1.74  | 1.69  | 1.99  | 1.27  | 1.03  | 1.23  | 0.72  | 1.52  | 2.19  | 1.55  | 1.61  | 1.51  | 1.16  |
| Gd                 | 8.13                    | 5.03   | 5.70   | 6.52  | 5.74  | 9.41  | 4.76  | 4.05  | 5.10  | 3.83  | 5.69  | 7.58  | 5.02  | 5.40  | 5.18  | 3.63  |
| Tb                 | 1.37                    | 0.92   | 0.91   | 1.09  | 1.02  | 1.75  | 0.89  | 0.72  | 0.91  | 0.70  | 1.01  | 1.24  | 0.83  | 0.88  | 0.85  | 0.56  |
| Dy                 | 8.28                    | 6.11   | 5.30   | 6.24  | 6.54  | 11.5  | 5.68  | 4.70  | 6.05  | 4.57  | 6.51  | 8.31  | 5.30  | 5.72  | 5.72  | 3.66  |
| Ho                 | 1.69                    | 1.28   | 1.09   | 1.27  | 1.38  | 2.43  | 1.19  | 1.04  | 1.30  | 0.93  | 1.35  | 1.73  | 1.06  | 1.15  | 1.12  | 0.70  |
| Er                 | 5.01                    | 3.87   | 3.16   | 3.78  | 4.10  | 7.15  | 3.62  | 3.21  | 3.88  | 2.71  | 4.00  | 4.98  | 2.88  | 3.16  | 3.19  | 2.01  |
| Tm                 | 0.69                    | 0.55   | 0.43   | 0.51  | 0.58  | 1.01  | 0.53  | 0.51  | 0.56  | 0.40  | 0.57  | 0.75  | 0.42  | 0.45  | 0.44  | 0.28  |
| Yb                 | 4.50                    | 3.59   | 2.87   | 3.37  | 3.87  | 6.32  | 3.57  | 3.47  | 3.68  | 2.72  | 3.83  | 4.68  | 2.57  | 2.88  | 2.96  | 1.77  |
| Lu                 | 0.66                    | 0.53   | 0.42   | 0.50  | 0.58  | 0.90  | 0.57  | 0.55  | 0.54  | 0.42  | 0.57  | 0.67  | 0.38  | 0.42  | 0.41  | 0.27  |
| Hf                 | 5.85                    | 3.40   | 4.11   | 5.39  | 3.71  | 6.09  | 3.36  | 4.57  | 3.09  | 3.67  | 4.01  | 4.80  | 3.20  | 3.50  | 3.57  | 2.19  |
| Ta                 | 0.78                    | 0.28   | 0.66   | 0.82  | 0.63  | 1.04  | 0.30  | 0.44  | 0.37  | 0.36  | 0.34  | 0.28  | 0.21  | 0.25  | 0.24  | 0.18  |



Table S3: Continued

| Location                               |                         | Dengxiangying dike |          |       |       |          |       |       |       |       |          |       |       |       |       |       |
|----------------------------------------|-------------------------|--------------------|----------|-------|-------|----------|-------|-------|-------|-------|----------|-------|-------|-------|-------|-------|
| Sample                                 | LQWI12                  | LQWI15             | LQWI17   | LQW19 | LQW20 | LQW22    | LQW24 | LQW25 | LQW27 | LQW28 | LQW29    | XF-06 | TJ-01 | TJ-03 | TJ-04 | TJ-05 |
| Rock type                              | Sub alkaline mafic rock |                    |          |       |       |          |       |       |       |       |          |       |       |       |       |       |
| Reference                              | Li and Zhao, 2018       |                    |          |       |       |          |       |       |       |       |          |       |       |       |       |       |
| Age(Ma)                                |                         |                    |          |       |       |          |       |       |       |       |          |       |       |       |       |       |
| Pb                                     | 82.1                    | 17.6               | 12.3     | 11.9  | 22.8  | 227      | 18.5  | 13.5  | 21.2  | 58.7  | 637      | 2.11  | 1.22  | 0.83  | 0.93  | 1.33  |
| Th                                     | 3.47                    | 0.52               | 3.05     | 6.52  | 0.66  | 2.54     | 0.84  | 0.76  | 0.89  | 0.84  | 0.78     | 0.37  | 0.26  | 0.29  | 0.28  | 0.18  |
| U                                      | 0.34                    | 0.09               | 0.41     | 0.70  | 0.20  | 0.38     | 0.27  | 0.15  | 0.25  | 0.96  | 0.69     | 0.15  | 0.11  | 0.13  | 0.14  | 0.09  |
| Isotopic date                          |                         |                    |          |       |       |          |       |       |       |       |          |       |       |       |       |       |
| <sup>87</sup> Sr/ <sup>86</sup> Sr (t) |                         |                    | 0.704015 |       |       | 0.730039 |       |       |       |       | 0.721586 |       |       |       |       |       |
| εNd (t)                                |                         |                    | -1.90    |       |       | -1.00    |       |       |       |       | 1.90     |       |       |       | 7.14  | 7.24  |
| Ratio                                  |                         |                    |          |       |       |          |       |       |       |       |          |       |       |       |       |       |
| Mg#                                    | 48.6                    | 64.2               | 73.8     | 52.4  | 58.2  | 55.1     | 57.7  | 42.2  | 51.4  | 46.6  | 48.4     | 52.2  | 58.1  | 58.0  | 58.7  | 66.1  |
| Sr/Y                                   | 3.87                    | 3.33               | 1.45     | 5.22  | 3.97  | 0.22     | 0.28  | 1.05  | 3.90  | 1.31  | 3.67     | 8.03  | 15.1  | 13.3  | 12.9  | 19.0  |
| Nb/La                                  | 0.48                    | 0.52               | 0.55     | 0.42  | 0.91  | 0.60     | 0.25  | 1.01  | 0.73  | 0.96  | 0.46     | 0.53  | 0.59  | 0.61  | 0.60  | 0.61  |
| Nb/U                                   | 30.0                    | 41.0               | 21.7     | 15.1  | 39.6  | 35.8     | 14.0  | 38.3  | 18.9  | 4.61  | 6.43     | 28.9  | 33.6  | 33.4  | 29.4  | 34.0  |

Table S3: Continued

| Location                       |                         |        |       |       |       |        |       |       |        |       |         |         |         |         |         |         |
|--------------------------------|-------------------------|--------|-------|-------|-------|--------|-------|-------|--------|-------|---------|---------|---------|---------|---------|---------|
| Yanbian dike                   |                         |        |       |       |       |        |       |       |        |       |         |         |         |         |         |         |
| Sample                         | TJ-07                   | DW-02  | HL-01 | HL-03 | HL-04 | HS-08  | HT-06 | HT-07 | HS-06  | HS-07 | 04HS-01 | 04HS-04 | 04HS-05 | 04HS-06 | 04HS-07 | 04HS-08 |
| Rock type                      | Sub alkaline mafic rock |        |       |       |       |        |       |       |        |       |         |         |         |         |         |         |
| Reference                      | Zhu et al., 2008        |        |       |       |       |        |       |       |        |       |         |         |         |         |         |         |
| Age(Ma)                        | 761                     |        |       |       |       |        |       |       |        |       |         |         |         |         |         |         |
| Major(wt.%)                    |                         |        |       |       |       |        |       |       |        |       |         |         |         |         |         |         |
| SiO <sub>2</sub>               | 44.62                   | 45.43  | 44.87 | 45.04 | 44.64 | 47.08  | 46.10 | 46.67 | 46.38  | 47.16 | 47.85   | 46.81   | 48.40   | 48.21   | 48.63   | 46.65   |
| TiO <sub>2</sub>               | 2.24                    | 1.65   | 1.96  | 2.19  | 1.95  | 1.63   | 2.30  | 2.34  | 2.13   | 1.95  | 1.66    | 2.16    | 1.69    | 1.30    | 1.42    | 1.51    |
| Al <sub>2</sub> O <sub>3</sub> | 15.92                   | 16.08  | 15.97 | 15.23 | 15.96 | 15.51  | 13.05 | 13.10 | 14.17  | 13.89 | 14.31   | 14.42   | 13.49   | 14.92   | 14.88   | 15.14   |
| Fe2O3T                         | 12.37                   | 11.27  | 12.29 | 12.43 | 12.04 | 12.13  | 15.20 | 15.30 | 14.17  | 12.71 | 12.85   | 14.32   | 12.80   | 11.73   | 11.87   | 11.86   |
| Fe <sub>2</sub> O <sub>3</sub> |                         |        |       |       |       |        |       |       |        |       |         |         |         |         |         |         |
| FeO                            |                         |        |       |       |       |        |       |       |        |       |         |         |         |         |         |         |
| MnO                            | 0.18                    | 0.16   | 0.18  | 0.18  | 0.19  | 0.18   | 0.25  | 0.22  | 0.24   | 0.19  | 0.21    | 0.24    | 0.19    | 0.20    | 0.18    | 0.19    |
| MgO                            | 7.24                    | 6.67   | 7.97  | 7.23  | 7.44  | 7.53   | 5.32  | 5.14  | 6.30   | 6.85  | 7.36    | 6.50    | 7.75    | 8.69    | 7.33    | 7.25    |
| CaO                            | 8.88                    | 8.87   | 8.18  | 10.85 | 9.68  | 10.21  | 10.80 | 10.32 | 10.76  | 11.27 | 10.56   | 9.99    | 11.09   | 8.41    | 8.82    | 11.11   |
| Na <sub>2</sub> O              | 3.37                    | 2.58   | 3.41  | 2.89  | 3.03  | 2.55   | 2.64  | 2.73  | 2.87   | 2.41  | 2.41    | 2.98    | 1.93    | 3.03    | 3.30    | 2.13    |
| K <sub>2</sub> O               | 0.41                    | 0.59   | 0.25  | 0.53  | 0.64  | 0.32   | 0.25  | 0.35  | 0.12   | 0.28  | 0.33    | 0.16    | 0.17    | 0.56    | 0.19    | 0.18    |
| P <sub>2</sub> O <sub>5</sub>  | 0.22                    | 0.20   | 0.20  | 0.26  | 0.20  | 0.19   | 0.29  | 0.30  | 0.24   | 0.23  | 0.19    | 0.27    | 0.17    | 0.14    | 0.17    | 0.17    |
| LOI                            | 3.35                    | 6.55   | 3.74  | 3.01  | 3.60  | 3.12   | 2.54  | 2.65  | 3.28   | 2.71  | 2.63    | 3.00    | 2.94    | 3.29    | 2.90    | 2.96    |
| TOL                            | 98.80                   | 100.05 | 99.02 | 99.84 | 99.37 | 100.45 | 98.74 | 99.12 | 100.66 | 99.65 | 100.36  | 100.85  | 100.62  | 100.48  | 99.69   | 99.15   |
| Trace(ppm)                     |                         |        |       |       |       |        |       |       |        |       |         |         |         |         |         |         |
| Li                             |                         |        |       |       |       |        |       |       |        |       |         |         |         |         |         |         |
| Be                             |                         |        |       |       |       |        |       |       |        |       |         |         |         |         |         |         |
| Sc                             | 38.4                    | 40.5   | 32.8  | 36.3  | 33.5  | 40.6   | 42.7  | 43.3  | 47.5   | 47.9  | 50.3    | 49.3    | 51.7    | 44.4    | 35.4    | 36.6    |
| V                              | 359                     | 354    | 334   | 384   | 342   | 341    | 466   | 473   | 428    | 424   | 353     | 433     | 412     | 268     | 301     | 288     |
| Cr                             | 139                     | 351    | 152   | 164   | 164   | 267    | 84.7  | 81.5  | 252    | 189   | 203     | 238     | 240     | 282     | 170     | 197     |
| Co                             | 48.6                    | 46.7   | 56.5  | 54.5  | 53.0  | 38.7   | 49.8  | 48.5  | 51.3   | 48.2  | 46.2    | 51.5    | 49.6    | 42.0    | 40.6    | 41.4    |
| Ni                             | 47.8                    | 87.3   | 85.8  | 59.6  | 81.4  | 113    | 33.3  | 33.9  | 80.7   | 70.3  | 75.5    | 72.7    | 65.0    | 90.9    | 64.5    | 73.8    |
| Cu                             | 61.8                    | 73.3   | 73.1  | 82.7  | 45.4  | 75.7   | 73.2  | 75.3  | 89.1   | 56.5  | 75.5    | 95.8    | 68.5    | 85.3    | 31.7    | 77.8    |
| Zn                             | 96.9                    | 97.6   | 118   | 90.5  | 85.9  | 104    | 133   | 135   | 129    | 99.4  | 104     | 127     | 88.6    | 74.6    | 64.2    | 83.7    |

Table S3: Continued

| Location  | Yanbian dike            |       |       |       |       |       |       |       |       |       |         |         |         |         |         |         |
|-----------|-------------------------|-------|-------|-------|-------|-------|-------|-------|-------|-------|---------|---------|---------|---------|---------|---------|
| Sample    | TJ-07                   | DW-02 | HL-01 | HL-03 | HL-04 | HS-08 | HT-06 | HT-07 | HS-06 | HS-07 | 04HS-01 | 04HS-04 | 04HS-05 | 04HS-06 | 04HS-07 | 04HS-08 |
| Rock type | Sub alkaline mafic rock |       |       |       |       |       |       |       |       |       |         |         |         |         |         |         |
| Reference | Zhu et al., 2008        |       |       |       |       |       |       |       |       |       |         |         |         |         |         |         |
| Age(Ma)   | 761                     |       |       |       |       |       |       |       |       |       |         |         |         |         |         |         |
| Ga        | 19.0                    | 17.6  | 16.3  | 18.9  | 17.7  | 17.8  | 20.0  | 20.6  | 21.0  | 18.6  | 17.5    | 20.5    | 17.4    | 15.3    | 16.9    | 18.3    |
| Ge        |                         |       |       |       |       |       |       |       |       |       |         |         |         |         |         |         |
| Rb        | 4.32                    | 8.99  | 3.33  | 7.54  | 10.4  | 4.51  | 6.80  | 11.3  | 1.16  | 3.06  | 6.02    | 2.15    | 2.11    | 7.39    | 1.94    | 2.14    |
| Sr        | 391                     | 248   | 175   | 329   | 337   | 292   | 305   | 279   | 467   | 249   | 220     | 437     | 271     | 187     | 226     | 284     |
| Y         | 28.8                    | 29.0  | 25.6  | 31.3  | 25.4  | 28.8  | 46.3  | 47.8  | 41.1  | 37.4  | 31.3    | 42.3    | 30.6    | 25.0    | 24.9    | 25.6    |
| Zr        | 150                     | 91.8  | 136   | 166   | 129   | 88.4  | 157   | 157   | 146   | 127   | 97.9    | 149     | 96.2    | 74.7    | 73.2    | 79.9    |
| Nb        | 4.25                    | 2.25  | 4.34  | 5.02  | 4.36  | 2.06  | 4.07  | 4.04  | 3.44  | 2.97  | 2.43    | 3.23    | 2.12    | 1.70    | 1.68    | 1.78    |
| Sn        |                         |       |       |       |       |       |       |       |       |       |         |         |         |         |         |         |
| Cs        | 0.10                    | 0.52  | 0.35  | 0.34  | 0.41  | 0.21  | 1.51  | 2.55  | 0.22  | 0.20  | 0.71    | 0.33    | 0.16    | 0.14    | 0.13    | 0.09    |
| Ba        | 85.8                    | 254   | 131   | 113   | 145   | 144   | 175   | 241   | 57.7  | 127   | 143     | 83.1    | 70.5    | 148     | 92.8    | 59.4    |
| La        | 7.31                    | 5.52  | 6.78  | 8.06  | 6.40  | 5.76  | 10.7  | 10.8  | 9.63  | 8.08  | 7.00    | 9.54    | 6.03    | 5.19    | 5.79    | 5.88    |
| Ce        | 20.5                    | 14.7  | 19.0  | 23.0  | 18.2  | 15.3  | 26.6  | 26.6  | 24.0  | 20.9  | 17.6    | 24.2    | 15.1    | 13.2    | 14.7    | 14.6    |
| Pr        | 3.39                    | 2.33  | 3.04  | 3.86  | 2.96  | 2.41  | 4.12  | 4.14  | 3.77  | 3.19  | 2.70    | 3.72    | 2.48    | 2.16    | 2.35    | 2.41    |
| Nd        | 17.7                    | 12.5  | 16.7  | 20.2  | 16.1  | 12.9  | 21.6  | 22.2  | 19.4  | 16.7  | 14.1    | 18.6    | 12.5    | 11.1    | 12.0    | 12.3    |
| Sm        | 4.91                    | 4.32  | 4.66  | 5.55  | 4.33  | 3.79  | 6.26  | 6.48  | 5.30  | 4.93  | 4.10    | 5.70    | 3.76    | 3.37    | 3.41    | 3.46    |
| Eu        | 1.60                    | 1.42  | 1.40  | 1.57  | 1.39  | 1.46  | 1.93  | 1.88  | 1.91  | 1.69  | 1.56    | 1.85    | 1.48    | 1.22    | 1.24    | 1.36    |
| Gd        | 5.26                    | 4.49  | 4.64  | 5.47  | 4.53  | 4.47  | 7.11  | 7.26  | 6.68  | 5.81  | 4.93    | 6.11    | 4.67    | 4.20    | 4.24    | 4.35    |
| Tb        | 0.87                    | 0.77  | 0.78  | 0.94  | 0.75  | 0.76  | 1.20  | 1.24  | 1.18  | 0.97  | 0.86    | 1.10    | 0.83    | 0.77    | 0.74    | 0.77    |
| Dy        | 5.77                    | 5.40  | 5.27  | 6.00  | 5.25  | 5.12  | 8.44  | 8.71  | 7.59  | 6.77  | 5.74    | 7.66    | 5.32    | 5.05    | 4.91    | 5.07    |
| Ho        | 1.13                    | 1.13  | 1.01  | 1.23  | 1.01  | 1.05  | 1.79  | 1.80  | 1.59  | 1.46  | 1.15    | 1.63    | 1.12    | 1.01    | 0.99    | 1.09    |
| Er        | 3.47                    | 3.28  | 2.99  | 3.57  | 3.00  | 3.02  | 5.21  | 5.27  | 4.64  | 4.12  | 3.26    | 4.67    | 3.22    | 2.98    | 2.95    | 3.00    |
| Tm        | 0.48                    | 0.48  | 0.43  | 0.48  | 0.43  | 0.44  | 0.76  | 0.76  | 0.69  | 0.61  | 0.47    | 0.68    | 0.45    | 0.43    | 0.41    | 0.43    |
| Yb        | 2.86                    | 3.08  | 2.76  | 3.37  | 2.76  | 2.73  | 4.94  | 4.90  | 4.32  | 3.80  | 3.04    | 4.33    | 2.92    | 2.84    | 2.75    | 2.88    |
| Lu        | 0.42                    | 0.48  | 0.40  | 0.51  | 0.39  | 0.40  | 0.73  | 0.74  | 0.66  | 0.53  | 0.45    | 0.60    | 0.43    | 0.42    | 0.39    | 0.42    |
| Hf        | 3.50                    | 2.30  | 2.95  | 3.67  | 2.90  | 2.35  | 3.91  | 4.05  | 3.74  | 3.23  | 2.62    | 4.10    | 2.63    | 2.18    | 2.08    | 2.18    |
| Ta        | 0.25                    | 0.13  | 0.26  | 0.30  | 0.26  | 0.12  | 0.21  | 0.22  | 0.23  | 0.19  | 0.16    | 0.21    | 0.14    | 0.12    | 0.11    | 0.12    |

Table S3: Continued

| Location                            |       | Yanbian dike            |       |       |       |       |       |       |       |       |         |         |         |         |         |         |
|-------------------------------------|-------|-------------------------|-------|-------|-------|-------|-------|-------|-------|-------|---------|---------|---------|---------|---------|---------|
| Sample                              | TJ-07 | DW-02                   | HL-01 | HL-03 | HL-04 | HS-08 | HT-06 | HT-07 | HS-06 | HS-07 | 04HS-01 | 04HS-04 | 04HS-05 | 04HS-06 | 04HS-07 | 04HS-08 |
| Rock type                           |       | Sub alkaline mafic rock |       |       |       |       |       |       |       |       |         |         |         |         |         |         |
| Reference                           |       | Zhu et al., 2008        |       |       |       |       |       |       |       |       |         |         |         |         |         |         |
| Age(Ma)                             |       | 761                     |       |       |       |       |       |       |       |       |         |         |         |         |         |         |
| Pb                                  | 1.05  | 2.51                    | 1.28  | 1.12  | 1.22  | 2.18  | 2.82  | 2.71  | 4.42  | 1.51  | 5.41    | 5.09    | 4.36    | 1.06    | 1.14    | 1.80    |
| Th                                  | 0.31  | 0.19                    | 0.32  | 0.40  | 0.29  | 0.17  | 0.87  | 0.88  | 0.67  | 0.63  | 0.47    | 0.71    | 0.45    | 0.39    | 0.38    | 0.39    |
| U                                   | 0.13  | 0.07                    | 0.14  | 0.15  | 0.15  | 0.07  | 0.21  | 0.23  | 0.17  | 0.15  | 0.13    | 0.18    | 0.18    | 0.09    | 0.11    | 0.11    |
| Isotopic date                       |       |                         |       |       |       |       |       |       |       |       |         |         |         |         |         |         |
| $^{87}\text{Sr}/^{86}\text{Sr}$ (t) |       |                         |       |       |       |       |       |       |       |       |         |         |         |         |         |         |
| $\epsilon_{\text{Nd}}$ (t)          |       |                         |       |       |       |       |       |       |       |       |         |         |         |         |         |         |
| Ratio                               |       |                         |       |       |       |       |       |       |       |       |         |         |         |         |         |         |
| Mg#                                 | 57.7  | 58.0                    | 60.2  | 57.5  | 59.0  | 59.1  | 44.9  | 43.9  | 50.9  | 55.7  | 57.2    | 51.4    | 58.5    | 63.3    | 59.0    | 58.8    |
| Sr/Y                                | 13.6  | 8.55                    | 6.84  | 10.5  | 13.3  | 10.1  | 6.59  | 5.84  | 11.4  | 6.66  | 7.03    | 10.3    | 8.86    | 7.48    | 9.08    | 11.1    |
| Nb/La                               | 0.58  | 0.41                    | 0.64  | 0.62  | 0.68  | 0.36  | 0.38  | 0.37  | 0.36  | 0.37  | 0.35    | 0.34    | 0.35    | 0.33    | 0.29    | 0.30    |
| Nb/U                                | 32.7  | 32.1                    | 31.0  | 33.5  | 29.1  | 29.4  | 19.4  | 17.6  | 20.2  | 19.8  | 18.7    | 17.9    | 11.8    | 18.9    | 15.3    | 16.2    |

**Table S3: Continued**

[illegible]

Table S3: Continued

| Location  |                         |         | Tongde dike |      |      |      |       |       |       |       |       |       |       |       |       |       |
|-----------|-------------------------|---------|-------------|------|------|------|-------|-------|-------|-------|-------|-------|-------|-------|-------|-------|
| Sample    | 04HS-10                 | 04HS-11 | TDM1        | TDM3 | TDM5 | TDM7 | TDM10 | TDM12 | TDM14 | TDM16 | TDM17 | TDM18 | TDM19 | TDM20 | TDM23 | TDM25 |
| Rock type | Sub alkaline mafic rock |         |             |      |      |      |       |       |       |       |       |       |       |       |       |       |
| Reference | Li and Zhao, 2018       |         |             |      |      |      |       |       |       |       |       |       |       |       |       |       |
| Age(Ma)   | 833                     |         |             |      |      |      |       |       |       |       |       |       |       |       |       |       |
| Ga        | 17.3                    | 17.7    |             |      |      |      |       |       |       |       |       |       |       |       |       |       |
| Ge        |                         |         |             |      |      |      |       |       |       |       |       |       |       |       |       |       |
| Rb        | 3.06                    | 8.13    | 5.76        | 12.8 | 33.4 | 6.14 | 4.20  | 1.13  | 17.4  | 17.2  | 9.79  | 23.5  | 33.1  | 35.2  | 37.1  | 40.6  |
| Sr        | 353                     | 315     | 411         | 978  | 675  | 384  | 665   | 959   | 827   | 773   | 860   | 864   | 846   | 834   | 879   | 787   |
| Y         | 25.7                    | 24.2    | 12.6        | 13.5 | 18.8 | 31.2 | 10.4  | 8.33  | 16.1  | 16.0  | 11.0  | 10.0  | 10.3  | 13.5  | 13.3  | 13.2  |
| Zr        | 73.7                    | 69.9    | 66.6        | 271  | 121  | 93.3 | 66.5  | 140   | 113   | 119   | 198   | 219   | 214   | 128   | 150   | 134   |
| Nb        | 1.74                    | 1.69    | 1.95        | 8.10 | 3.67 | 4.12 | 3.28  | 4.07  | 3.91  | 3.96  | 6.65  | 7.59  | 7.16  | 3.04  | 3.88  | 3.37  |
| Sn        |                         |         |             |      |      |      |       |       |       |       |       |       |       |       |       |       |
| Cs        | 0.19                    | 0.29    | 0.16        | 0.68 | 1.67 | 0.28 | 0.16  | 0.12  | 0.50  | 0.41  | 0.55  | 0.65  | 0.52  | 0.63  | 0.50  | 0.48  |
| Ba        | 88.5                    | 118     | 651         | 570  | 612  | 596  | 481   | 139   | 556   | 440   | 426   | 603   | 1380  | 404   | 651   | 656   |
| La        | 6.45                    | 5.63    | 8.06        | 28.8 | 17.0 | 12.6 | 10.4  | 13.2  | 17.9  | 18.9  | 19.5  | 19.5  | 19.8  | 13.9  | 16.6  | 14.2  |
| Ce        | 15.3                    | 14.2    | 17.9        | 59.9 | 36.1 | 41.8 | 24.3  | 29.3  | 37.0  | 40.1  | 40.6  | 41.0  | 41.9  | 29.9  | 34.9  | 30.1  |
| Pr        | 2.48                    | 2.29    | 2.36        | 7.17 | 4.71 | 6.69 | 3.19  | 3.88  | 4.68  | 4.46  | 4.12  | 4.43  | 4.77  | 3.40  | 3.95  | 3.64  |
| Nd        | 12.4                    | 11.6    | 10.4        | 28.2 | 19.8 | 32.1 | 13.7  | 16.4  | 19.9  | 19.5  | 17.5  | 18.7  | 20.2  | 14.9  | 16.9  | 15.9  |
| Sm        | 3.60                    | 3.43    | 2.20        | 4.47 | 3.89 | 7.25 | 2.68  | 2.80  | 3.92  | 3.86  | 3.34  | 3.48  | 3.74  | 3.14  | 3.50  | 3.15  |
| Eu        | 1.41                    | 1.32    | 0.82        | 1.44 | 1.27 | 2.11 | 1.10  | 1.13  | 1.41  | 1.33  | 1.30  | 1.37  | 1.56  | 1.13  | 1.22  | 1.20  |
| Gd        | 4.42                    | 4.24    | 2.29        | 3.75 | 3.79 | 6.83 | 2.48  | 2.43  | 3.52  | 3.41  | 2.89  | 2.93  | 3.20  | 2.82  | 3.13  | 3.07  |
| Tb        | 0.79                    | 0.74    | 0.35        | 0.52 | 0.57 | 1.03 | 0.35  | 0.33  | 0.53  | 0.50  | 0.41  | 0.41  | 0.43  | 0.43  | 0.45  | 0.43  |
| Dy        | 5.08                    | 4.86    | 1.90        | 2.29 | 3.05 | 5.54 | 1.81  | 1.49  | 2.71  | 2.56  | 1.84  | 1.76  | 1.87  | 2.17  | 2.26  | 2.16  |
| Ho        | 1.11                    | 1.02    | 0.38        | 0.42 | 0.62 | 1.06 | 0.34  | 0.27  | 0.52  | 0.49  | 0.33  | 0.30  | 0.32  | 0.41  | 0.43  | 0.41  |
| Er        | 3.05                    | 2.82    | 1.17        | 1.33 | 1.83 | 3.02 | 1.00  | 0.80  | 1.56  | 1.46  | 0.94  | 0.85  | 0.91  | 1.22  | 1.24  | 1.20  |
| Tm        | 0.45                    | 0.41    | 0.16        | 0.15 | 0.25 | 0.40 | 0.12  | 0.10  | 0.20  | 0.19  | 0.11  | 0.10  | 0.11  | 0.16  | 0.16  | 0.15  |
| Yb        | 2.87                    | 2.70    | 1.11        | 1.04 | 1.65 | 2.59 | 0.83  | 0.67  | 1.33  | 1.27  | 0.78  | 0.66  | 0.72  | 1.03  | 1.05  | 0.98  |
| Lu        | 0.42                    | 0.39    | 0.16        | 0.15 | 0.24 | 0.37 | 0.12  | 0.10  | 0.19  | 0.19  | 0.11  | 0.090 | 0.10  | 0.15  | 0.15  | 0.15  |
| Hf        | 2.15                    | 2.07    | 1.44        | 5.37 | 2.65 | 2.47 | 1.29  | 2.98  | 2.51  | 2.55  | 3.99  | 4.48  | 4.46  | 2.65  | 3.22  | 2.82  |
| Ta        | 0.12                    | 0.11    | 0.16        | 0.50 | 0.31 | 0.22 | 0.30  | 0.25  | 0.36  | 0.27  | 3.30  | 0.45  | 0.40  | 0.24  | 0.25  | 0.30  |

Table S3: Continued

| Location                               |                         |         | Tongde dike |      |      |      |          |       |       |          |       |          |       |       |       |       |
|----------------------------------------|-------------------------|---------|-------------|------|------|------|----------|-------|-------|----------|-------|----------|-------|-------|-------|-------|
| Sample                                 | 04HS-10                 | 04HS-11 | TDM1        | TDM3 | TDM5 | TDM7 | TDM10    | TDM12 | TDM14 | TDM16    | TDM17 | TDM18    | TDM19 | TDM20 | TDM23 | TDM25 |
| Rock type                              | Sub alkaline mafic rock |         |             |      |      |      |          |       |       |          |       |          |       |       |       |       |
| Reference                              | Li and Zhao, 2018       |         |             |      |      |      |          |       |       |          |       |          |       |       |       |       |
| Age(Ma)                                | 833                     |         |             |      |      |      |          |       |       |          |       |          |       |       |       |       |
| Pb                                     | 4.35                    | 0.92    | 2.76        | 10.4 | 4.57 | 3.61 | 4.51     | 6.29  | 5.29  | 4.65     | 7.55  | 4.96     | 6.21  | 6.89  | 8.79  | 12.3  |
| Th                                     | 0.39                    | 0.38    | 1.11        | 1.42 | 3.00 | 0.23 | 0.30     | 0.63  | 3.21  | 3.08     | 0.81  | 0.71     | 0.75  | 1.57  | 1.54  | 1.40  |
| U                                      | 0.13                    | 0.11    | 0.20        | 0.36 | 0.54 | 0.10 | 0.11     | 0.20  | 0.67  | 0.66     | 0.23  | 0.19     | 0.17  | 0.51  | 0.48  | 0.42  |
| Isotopic date                          |                         |         |             |      |      |      |          |       |       |          |       |          |       |       |       |       |
| <sup>87</sup> Sr/ <sup>86</sup> Sr (t) |                         |         | 0.705525    |      |      |      | 0.705283 |       |       | 0.705392 |       | 0.706320 |       |       |       |       |
| ε <sub>Nd</sub> (t)                    | 4.91                    |         | 0.80        |      |      |      | 0.60     |       |       | 2.00     |       | 1.30     |       |       |       |       |
| Ratio                                  |                         |         |             |      |      |      |          |       |       |          |       |          |       |       |       |       |
| Mg#                                    | 57.0                    | 57.6    | 71.9        | 43.7 | 58.9 | 68.6 | 64.1     | 68.2  | 55.7  | 54.1     | 54.2  | 53.0     | 54.6  | 59.7  | 58.1  | 63.4  |
| Sr/Y                                   | 13.7                    | 13.0    | 32.6        | 72.4 | 35.9 | 12.3 | 63.9     | 115   | 51.4  | 48.3     | 78.2  | 86.4     | 82.1  | 61.8  | 66.1  | 59.6  |
| Nb/La                                  | 0.27                    | 0.30    | 0.24        | 0.28 | 0.22 | 0.33 | 0.32     | 0.31  | 0.22  | 0.21     | 0.34  | 0.39     | 0.36  | 0.22  | 0.23  | 0.24  |
| Nb/U                                   | 13.4                    | 15.4    | 9.75        | 22.5 | 6.80 | 41.2 | 29.8     | 20.4  | 5.84  | 6.00     | 28.9  | 39.9     | 42.1  | 5.96  | 8.08  | 8.02  |

Table S3: Continued

| Location                       |                         |       | Datian dike |        |        |        |        |        |        |        |        |        |        |        |        |        |
|--------------------------------|-------------------------|-------|-------------|--------|--------|--------|--------|--------|--------|--------|--------|--------|--------|--------|--------|--------|
| Sample                         | TDM26                   | TDM27 | HM1103      | HM1104 | 11DT02 | 11DT03 | DT1204 | DT1205 | 11DT04 | DT1408 | DT1409 | DT1410 | DT1411 | DT1412 | DT1416 | DT1417 |
| Rock type                      | Sub alkaline mafic rock |       |             |        |        |        |        |        |        |        |        |        |        |        |        |        |
| Reference                      | Yang et al., 2017       |       |             |        |        |        |        |        |        |        |        |        |        |        |        |        |
| Age(Ma)                        | 809                     |       |             |        | 794    |        |        |        |        |        |        |        |        |        |        |        |
| Major(wt.%)                    |                         |       |             |        |        |        |        |        |        |        |        |        |        |        |        |        |
| SiO <sub>2</sub>               | 50.55                   | 52.45 | 48.17       | 47.13  | 48.36  | 47.65  | 47.56  | 52.54  | 46.64  | 47.90  | 46.90  | 47.20  | 47.00  | 46.80  | 45.40  | 45.70  |
| TiO <sub>2</sub>               | 1.20                    | 1.10  | 1.62        | 1.18   | 0.88   | 1.11   | 1.04   | 0.31   | 3.60   | 1.54   | 3.53   | 3.58   | 2.30   | 2.31   | 1.73   | 1.76   |
| Al <sub>2</sub> O <sub>3</sub> | 17.89                   | 17.88 | 14.96       | 15.40  | 15.21  | 16.49  | 15.62  | 15.42  | 12.92  | 15.35  | 13.35  | 13.30  | 14.85  | 14.80  | 16.05  | 16.15  |
| Fe2O3T                         | 9.48                    | 9.22  | 11.41       | 10.58  | 10.11  | 10.68  | 10.56  | 9.21   | 16.14  | 12.22  | 16.64  | 16.72  | 14.92  | 14.98  | 11.78  | 11.63  |
| Fe <sub>2</sub> O <sub>3</sub> |                         |       |             |        |        |        |        |        |        |        |        |        |        |        |        |        |
| FeO                            |                         |       |             |        |        |        |        |        |        |        |        |        |        |        |        |        |
| MnO                            | 0.19                    | 0.14  | 0.19        | 0.16   | 0.16   | 0.16   | 0.18   | 0.15   | 0.27   | 0.21   | 0.27   | 0.28   | 0.24   | 0.23   | 0.21   | 0.21   |
| MgO                            | 5.42                    | 4.71  | 7.86        | 8.97   | 8.29   | 8.12   | 9.52   | 7.06   | 5.03   | 7.32   | 5.14   | 5.13   | 6.47   | 6.59   | 8.77   | 8.42   |
| CaO                            | 7.73                    | 8.04  | 9.11        | 9.57   | 12.20  | 11.30  | 10.53  | 10.65  | 8.68   | 9.68   | 8.68   | 8.64   | 8.81   | 8.55   | 7.93   | 7.81   |
| Na <sub>2</sub> O              | 3.03                    | 3.43  | 2.46        | 2.09   | 2.10   | 2.18   | 2.27   | 2.79   | 2.38   | 2.26   | 2.67   | 2.57   | 1.86   | 2.23   | 2.53   | 2.61   |
| K <sub>2</sub> O               | 1.80                    | 1.19  | 1.29        | 1.20   | 0.53   | 0.43   | 0.65   | 0.47   | 1.37   | 1.24   | 0.91   | 1.02   | 0.83   | 0.59   | 1.40   | 1.44   |
| P <sub>2</sub> O <sub>5</sub>  | 0.28                    | 0.33  | 0.25        | 0.16   | 0.07   | 0.10   | 0.12   | 0.02   | 0.45   | 0.23   | 0.47   | 0.46   | 0.30   | 0.30   | 0.17   | 0.16   |
| LOI                            | 1.71                    | 1.12  | 1.96        | 2.89   | 1.43   | 1.13   | 1.64   | 0.65   | 1.49   | 1.57   | 1.14   | 1.00   | 2.34   | 2.41   | 4.16   | 3.99   |
| TOL                            | 99.28                   | 99.62 | 99.26       | 99.31  | 99.35  | 99.35  | 99.69  | 99.27  | 98.97  | 99.52  | 99.70  | 99.90  | 99.92  | 99.79  | 100.13 | 99.88  |
| Trace(ppm)                     |                         |       |             |        |        |        |        |        |        |        |        |        |        |        |        |        |
| Li                             |                         |       |             |        |        |        |        |        |        |        |        |        |        |        |        |        |
| Be                             |                         |       |             |        |        |        |        |        |        |        |        |        |        |        |        |        |
| Sc                             | 26.3                    | 23.2  | 27.6        | 27.9   | 44.6   | 35.5   | 34.9   | 33.9   | 48.3   | 51.4   | 65.3   | 58.5   | 33.9   | 54.5   | 50.5   | 52.0   |
| V                              | 283                     | 240   | 178         | 192    | 271    | 226    | 240    | 205    | 249    | 231    | 254    | 237    | 205    | 226    | 240    | 245    |
| Cr                             | 35.6                    | 21.5  | 326         | 517    | 502    | 373    | 881    | 270    | 97.0   | 360    | 125    | 99.0   | 256    | 275    | 444    | 402    |
| Co                             | 30.4                    | 28.4  | 39.6        | 44.4   | 42.4   | 47.8   | 42.9   | 33.9   | 44.0   | 44.2   | 49.5   | 40.5   | 33.9   | 43.1   | 53.1   | 49.7   |
| Ni                             | 23.0                    | 17.0  | 41.0        | 42.1   | 21.2   | 9.78   | 21.8   | 13.8   | 6.97   | 17.2   | 13.5   | 13.3   | 13.8   | 42.1   | 171    | 128    |
| Cu                             |                         |       | 21.6        | 25.2   | 15.8   | 28.9   | 22.1   | 13.6   | 45.4   | 27.6   | 39.9   | 32.0   | 13.6   | 36.1   | 51.6   | 43.8   |
| Zn                             |                         |       | 103         | 112    | 65.7   | 99.5   | 107    | 95.9   | 256    | 117    | 187    | 182    | 95.9   | 149    | 173    | 169    |



Table S3: Continued

| Location  |                         |       | Datian dike |        |        |        |        |        |        |        |        |        |        |        |        |        |
|-----------|-------------------------|-------|-------------|--------|--------|--------|--------|--------|--------|--------|--------|--------|--------|--------|--------|--------|
| Sample    | TDM26                   | TDM27 | HM1103      | HM1104 | 11DT02 | 11DT03 | DT1204 | DT1205 | 11DT04 | DT1408 | DT1409 | DT1410 | DT1411 | DT1412 | DT1416 | DT1417 |
| Rock type | Sub alkaline mafic rock |       |             |        |        |        |        |        |        |        |        |        |        |        |        |        |
| Reference | Yang et al., 2017       |       |             |        |        |        |        |        |        |        |        |        |        |        |        |        |
| Age(Ma)   | 809                     |       |             |        | 794    |        |        |        |        |        |        |        |        |        |        |        |
| Ga        |                         |       | 15.6        | 15.3   | 14.3   | 14.8   | 15.8   | 17.7   | 23.5   | 18.3   | 24.6   | 23.9   | 17.7   | 21.0   | 19.3   | 19.7   |
| Ge        |                         |       |             |        |        |        |        |        |        |        |        |        |        |        |        |        |
| Rb        | 43.2                    | 23.6  | 83.7        | 73.4   | 13.4   | 11.3   | 34.2   | 10.3   | 80.0   | 97.6   | 51.3   | 60.3   | 10.3   | 39.7   | 97.9   | 99.1   |
| Sr        | 614                     | 788   | 272         | 280    | 214    | 240    | 240    | 266    | 216    | 262    | 232    | 240    | 266    | 275    | 449    | 447    |
| Y         | 29.2                    | 21.5  | 25.8        | 22.0   | 16.7   | 12.6   | 20.3   | 35.0   | 57.1   | 34.9   | 57.1   | 57.6   | 35.0   | 43.2   | 33.8   | 34.8   |
| Zr        | 106                     | 122   | 126         | 92.4   | 54.3   | 36.0   | 58.2   | 108    | 213    | 134    | 228    | 241    | 108    | 154    | 116    | 116    |
| Nb        | 5.12                    | 4.65  | 8.18        | 5.78   | 3.74   | 2.62   | 2.46   | 4.41   | 13.9   | 7.56   | 12.9   | 13.0   | 4.41   | 7.46   | 4.16   | 3.91   |
| Sn        |                         |       |             |        |        |        |        |        |        |        |        |        |        |        |        |        |
| Cs        | 0.78                    | 0.56  | 0.69        | 0.86   | 0.27   | 0.26   | 0.45   | 0.17   | 0.90   | 2.73   | 0.75   | 0.77   | 0.17   | 1.05   | 1.24   | 1.19   |
| Ba        | 666                     | 609   | 266         | 272    | 157    | 149    | 155    | 114    | 526    | 200    | 361    | 361    | 114    | 207    | 252    | 243    |
| La        | 11.0                    | 14.2  | 15.3        | 15.1   | 7.26   | 5.73   | 7.13   | 16.8   | 28.2   | 13.5   | 24.6   | 25.2   | 16.8   | 13.4   | 9.11   | 9.15   |
| Ce        | 27.3                    | 31.4  | 31.4        | 26.0   | 16.1   | 12.5   | 16.8   | 34.1   | 59.4   | 31.8   | 56.9   | 58.4   | 34.1   | 31.9   | 23.1   | 23.4   |
| Pr        | 3.80                    | 3.76  | 4.38        | 3.76   | 2.27   | 1.49   | 2.42   | 4.46   | 7.58   | 3.97   | 7.42   | 7.60   | 4.46   | 4.26   | 3.29   | 3.29   |
| Nd        | 18.0                    | 17.5  | 18.6        | 15.2   | 10.1   | 6.80   | 11.4   | 18.7   | 34.1   | 17.9   | 34.2   | 34.5   | 18.7   | 19.6   | 16.0   | 16.4   |
| Sm        | 4.48                    | 3.97  | 4.45        | 3.67   | 2.52   | 1.79   | 3.12   | 4.98   | 8.72   | 4.64   | 8.78   | 8.66   | 4.98   | 5.53   | 4.59   | 4.54   |
| Eu        | 1.71                    | 1.49  | 1.49        | 1.25   | 0.98   | 1.02   | 1.23   | 1.18   | 2.58   | 1.51   | 2.85   | 2.84   | 1.18   | 2.01   | 1.62   | 1.82   |
| Gd        | 4.70                    | 4.09  | 4.41        | 3.75   | 2.81   | 1.99   | 3.32   | 5.10   | 9.88   | 5.26   | 9.39   | 9.56   | 5.10   | 6.43   | 5.13   | 5.23   |
| Tb        | 0.78                    | 0.63  | 0.76        | 0.66   | 0.48   | 0.37   | 0.62   | 1.05   | 1.73   | 0.95   | 1.65   | 1.67   | 1.05   | 1.14   | 0.93   | 0.98   |
| Dy        | 4.58                    | 3.44  | 4.80        | 4.12   | 3.16   | 2.47   | 3.53   | 6.19   | 10.8   | 6.16   | 10.0   | 10.3   | 6.19   | 7.32   | 5.91   | 5.94   |
| Ho        | 0.93                    | 0.68  | 1.02        | 0.83   | 0.65   | 0.51   | 0.82   | 1.43   | 2.19   | 1.25   | 2.12   | 2.21   | 1.43   | 1.57   | 1.26   | 1.34   |
| Er        | 2.75                    | 2.01  | 2.66        | 2.19   | 1.70   | 1.32   | 2.21   | 3.84   | 5.89   | 3.56   | 5.92   | 6.29   | 3.84   | 4.52   | 3.49   | 3.74   |
| Tm        | 0.38                    | 0.27  | 0.38        | 0.31   | 0.24   | 0.17   | 0.31   | 0.56   | 0.84   | 0.55   | 0.88   | 0.80   | 0.56   | 0.68   | 0.50   | 0.54   |
| Yb        | 2.60                    | 1.79  | 2.46        | 2.09   | 1.54   | 1.20   | 2.00   | 3.66   | 5.26   | 3.29   | 5.51   | 5.54   | 3.66   | 4.09   | 3.21   | 3.29   |
| Lu        | 0.38                    | 0.27  | 0.37        | 0.30   | 0.23   | 0.18   | 0.31   | 0.54   | 0.79   | 0.51   | 0.80   | 0.83   | 0.54   | 0.60   | 0.49   | 0.51   |
| Hf        | 2.36                    | 2.64  | 3.24        | 2.79   | 1.60   | 1.15   | 1.96   | 3.46   | 6.40   | 3.21   | 5.60   | 6.03   | 3.46   | 4.10   | 3.07   | 2.93   |
| Ta        | 0.54                    | 0.29  | 0.47        | 0.38   | 0.21   | 0.18   | 0.15   | 0.35   | 0.66   | 0.37   | 0.70   | 0.72   | 0.35   | 0.41   | 0.23   | 0.20   |

Table S3: Continued

| Location                               |                         |       | Datian dike |        |        |        |        |        |        |        |        |        |        |        |        |        |
|----------------------------------------|-------------------------|-------|-------------|--------|--------|--------|--------|--------|--------|--------|--------|--------|--------|--------|--------|--------|
| Sample                                 | TDM26                   | TDM27 | HM1103      | HM1104 | 11DT02 | 11DT03 | DT1204 | DT1205 | 11DT04 | DT1408 | DT1409 | DT1410 | DT1411 | DT1412 | DT1416 | DT1417 |
| Rock type                              | Sub alkaline mafic rock |       |             |        |        |        |        |        |        |        |        |        |        |        |        |        |
| Reference                              | Yang et al., 2017       |       |             |        |        |        |        |        |        |        |        |        |        |        |        |        |
| Age(Ma)                                | 809                     |       |             |        | 794    |        |        |        |        |        |        |        |        |        |        |        |
| Pb                                     | 6.70                    | 10.9  | 3.21        | 3.84   | 1.62   | 1.84   | 2.63   | 3.05   | 9.85   | 3.58   | 6.80   | 5.70   | 3.05   | 2.25   | 2.01   | 1.88   |
| Th                                     | 0.92                    | 1.30  | 2.59        | 1.90   | 0.62   | 0.55   | 0.66   | 1.35   | 1.92   | 0.84   | 1.82   | 1.88   | 1.35   | 0.89   | 0.68   | 0.65   |
| U                                      | 0.48                    | 0.58  | 0.64        | 0.54   | 0.12   | 0.26   | 0.18   | 0.49   | 0.49   | 0.65   | 0.75   | 0.46   | 0.49   | 0.16   | 0.14   | 0.12   |
| Isotopic date                          |                         |       |             |        |        |        |        |        |        |        |        |        |        |        |        |        |
| <sup>87</sup> Sr/ <sup>86</sup> Sr (t) | 0.704862                |       |             |        |        |        |        |        |        |        |        |        |        |        |        |        |
| εNd (t)                                | 0.70                    |       | -2.2        |        | -3.3   |        | 1.1    |        | -1.2   | -2.4   | -1.1   |        |        | -1.4   |        | -0.2   |
| Ratio                                  |                         |       |             |        |        |        |        |        |        |        |        |        |        |        |        |        |
| Mg#                                    | 57.1                    | 54.3  | 61.6        | 66.4   | 65.6   | 63.9   | 67.8   | 64.1   | 42.1   | 58.3   | 41.9   | 41.7   | 50.3   | 50.6   | 63.4   | 62.8   |
| Sr/Y                                   | 21.0                    | 36.7  | 10.5        | 12.7   | 12.8   | 19.0   | 11.8   | 7.60   | 3.78   | 7.51   | 4.06   | 4.17   | 7.60   | 6.37   | 13.3   | 12.8   |
| Nb/La                                  | 0.47                    | 0.33  | 0.53        | 0.38   | 0.52   | 0.46   | 0.35   | 0.26   | 0.49   | 0.56   | 0.52   | 0.52   | 0.26   | 0.56   | 0.46   | 0.43   |
| Nb/U                                   | 10.7                    | 8.02  | 12.8        | 10.7   | 31.2   | 10.1   | 13.7   | 9.00   | 28.4   | 11.6   | 17.2   | 28.3   | 9.00   | 46.6   | 29.7   | 32.6   |

**Table S4: The isotope results for the Neoproterozoic mafic and adakitic pluton in the western margin of the Yangtze Block**

| Locality           | Rock type      | Spot      | Best |     | Isotopic ratio     |     |                    |     |                    |          | εHf      | ±1σ      | T <sub>DM1</sub> | T <sub>DM2</sub> | Reference         |      |      |
|--------------------|----------------|-----------|------|-----|--------------------|-----|--------------------|-----|--------------------|----------|----------|----------|------------------|------------------|-------------------|------|------|
|                    |                |           | age  |     | <sup>176</sup> Yb/ |     | <sup>176</sup> Lu/ |     | <sup>176</sup> Hf/ |          |          |          |                  |                  |                   | (Ma) | (Ma) |
|                    |                |           |      |     | <sup>177</sup> Hf  | ±1σ | <sup>177</sup> Hf  | ±1σ | <sup>177</sup> Hf  | ±1σ      |          |          |                  |                  |                   |      |      |
| Baoxing intrusions | gabbro-diorite | SC01-4.01 | 803  | 13  | 0.084449           |     | 0.001775           |     | 0.282546           | 0.000015 | 8.78     |          | 1.01             | 1.15             | Meng et al., 2015 |      |      |
|                    |                | SC01-4.02 | 803  | 11  | 0.074014           |     | 0.001245           |     | 0.282402           | 0.000013 | 3.99     |          | 0.88             | 1.46             |                   |      |      |
|                    |                | SC01-4.03 | 803  | 12  | 0.072635           |     | 0.001617           |     | 0.282601           | 0.000013 | 10.83    |          | 0.92             | 1.02             |                   |      |      |
|                    |                | SC01-4.04 | 801  | 11  | 0.093991           |     | 0.002028           |     | 0.282606           | 0.000013 | 10.75    |          | 0.93             | 1.02             |                   |      |      |
|                    |                | SC01-4.05 | 802  | 11  | 0.077025           |     | 0.001707           |     | 0.282591           | 0.000015 | 10.39    |          | 1.02             | 1.05             |                   |      |      |
|                    |                | SC01-4.06 | 804  | 12  | 0.073636           |     | 0.001656           |     | 0.282632           | 0.000016 | 11.91    |          | 1.12             | 0.95             |                   |      |      |
|                    |                | SC01-4.11 | 806  | 12  | 0.069632           |     | 0.001819           |     | 0.282571           | 0.000011 | 9.73     |          | 0.75             | 1.09             |                   |      |      |
|                    |                | SC01-4.13 | 801  | 15  | 0.089522           |     | 0.001992           |     | 0.282604           | 0.000014 | 10.68    |          | 0.95             | 1.03             |                   |      |      |
|                    |                | SC01-4.14 | 798  | 12  | 0.090069           |     | 0.002054           |     | 0.282636           | 0.000012 | 11.72    |          | 0.86             | 0.96             |                   |      |      |
|                    |                | SC01-4.15 | 851  | 12  | 0.073472           |     | 0.001788           |     | 0.282608           | 0.000012 | 12.00    |          | 0.79             | 0.98             |                   |      |      |
|                    |                | SC01-4.16 | 847  | 13  | 0.036791           |     | 0.000874           |     | 0.28251            | 0.000011 | 8.95     |          | 0.74             | 1.17             |                   |      |      |
|                    |                | SC01-4.17 | 847  | 13  | 0.070775           |     | 0.002397           |     | 0.282617           | 0.000011 | 11.90    |          | 0.73             | 0.98             |                   |      |      |
|                    |                | SC01-4.18 | 852  | 14  | 0.08011            |     | 0.001923           |     | 0.28262            | 0.000012 | 12.36    |          | 0.85             | 0.96             |                   |      |      |
|                    |                | SC01-4.19 | 846  | 15  | 0.051201           |     | 0.001379           |     | 0.282607           | 0.000010 | 12.09    |          | 0.66             | 0.97             |                   |      |      |
|                    |                | SC01-4.20 | 850  | 14  | 0.070636           |     | 0.001746           |     | 0.282604           | 0.000012 | 11.84    |          | 0.80             | 0.99             |                   |      |      |
|                    |                | SC01-4.21 | 844  | 12  | 0.155961           |     | 0.003741           |     | 0.282565           | 0.000012 | 9.23     |          | 0.84             | 1.15             |                   |      |      |
|                    |                | SC01-4.22 | 804  | 12  | 0.046613           |     | 0.001221           |     | 0.282565           | 0.000011 | 9.77     |          | 0.72             | 1.09             |                   |      |      |
|                    |                | SC01-4.25 | 798  | 12  | 0.068056           |     | 0.001637           |     | 0.2826             | 0.000009 | 10.66    |          | 0.64             | 1.03             |                   |      |      |
|                    |                | SC01-4.26 | 801  | 12  | 0.05972            |     | 0.00133            |     | 0.282561           | 0.000013 | 9.53     |          | 0.89             | 1.10             |                   |      |      |
|                    |                | SC01-4.27 | 806  | 11  | 0.143982           |     | 0.003652           |     | 0.282662           | 0.000012 | 11.94    |          | 0.82             | 0.95             |                   |      |      |
|                    |                | SC01-4.28 | 802  | 12  | 0.066775           |     | 0.001586           |     | 0.28262            | 0.000012 | 11.48    |          | 0.85             | 0.98             |                   |      |      |
|                    |                | SC01-4.29 | 850  | 13  | 0.066792           |     | 0.002231           |     | 0.282592           | 0.000012 | 11.16    |          | 0.85             | 1.04             |                   |      |      |
|                    |                | SC01-4.30 | 848  | 12  | 0.106467           |     | 0.002573           |     | 0.282696           | 0.000012 | 14.62    |          | 0.84             | 0.81             |                   |      |      |
|                    |                | SC01-4.31 | 797  | 12  | 0.061237           |     | 0.00162            |     | 0.282633           | 0.000011 | 11.82    |          | 0.73             | 0.95             |                   |      |      |
|                    |                | SC01-4.32 | 799  | 12  | 0.071359           |     | 0.001678           |     | 0.282516           | 0.000009 | 7.68     |          | 0.63             | 1.22             |                   |      |      |
|                    |                | SC02-1.01 |      | 851 | 12                 |     | 0.093448           |     | 0.002916           |          | 0.28247  | 0.000014 | 6.45             |                  |                   | 0.95 | 1.34 |
|                    |                | SC02-1.02 |      | 899 | 13                 |     | 0.162084           |     | 0.005088           |          | 0.282587 | 0.000014 | 10.29            |                  |                   | 0.96 | 1.13 |
|                    |                | SC02-1.03 |      | 856 | 12                 |     | 0.028909           |     | 0.000671           |          | 0.282525 | 0.000012 | 9.81             |                  |                   | 0.80 | 1.13 |
|                    |                | SC02-1.08 |      | 849 | 13                 |     | 0.10375            |     | 0.003361           |          | 0.282617 | 0.000015 | 11.39            |                  |                   | 1.05 | 1.02 |

**Table S4: The isotope results for the Neoproterozoic mafic and adakitic pluton in the western margin of the Yangtze Block**

| Locality | Rock type | Spot      | Best |     | Isotopic ratio     |     |                    |     |                    |          | εHf   | ±1σ | T <sub>DM1</sub> | T <sub>DM2</sub> | Reference |
|----------|-----------|-----------|------|-----|--------------------|-----|--------------------|-----|--------------------|----------|-------|-----|------------------|------------------|-----------|
|          |           |           | age  |     | <sup>176</sup> Yb/ |     | <sup>176</sup> Lu/ |     | <sup>176</sup> Hf/ |          |       |     |                  |                  |           |
|          |           |           | (Ma) | ±1σ | <sup>177</sup> Hf  | ±1σ | <sup>177</sup> Hf  | ±1σ | <sup>177</sup> Hf  | ±1σ      |       |     |                  |                  |           |
|          |           | SC02-1.11 | 845  | 13  | 0.101585           |     | 0.002456           |     | 0.282616           | 0.000014 | 11.79 |     | 0.98             | 0.99             |           |
|          |           | SC02-1.12 | 905  | 14  | 0.085116           |     | 0.002887           |     | 0.282593           | 0.000015 | 11.94 |     | 1.07             | 1.03             |           |
|          |           | SC02-1.14 | 852  | 13  | 0.130528           |     | 0.003037           |     | 0.282607           | 0.000013 | 11.26 |     | 0.86             | 1.03             |           |
|          |           | SC02-1.16 | 849  | 13  | 0.150997           |     | 0.004184           |     | 0.282533           | 0.000015 | 7.93  |     | 1.00             | 1.24             |           |
|          |           | SC02-1.17 | 847  | 13  | 0.061299           |     | 0.001972           |     | 0.282518           | 0.000013 | 8.63  |     | 0.91             | 1.20             |           |
|          |           | SC02-1.19 | 851  | 12  | 0.118374           |     | 0.00295            |     | 0.282596           | 0.000013 | 10.89 |     | 0.89             | 1.05             |           |
|          |           | SC02-1.20 | 848  | 12  | 0.07138            |     | 0.001818           |     | 0.282519           | 0.000015 | 8.77  |     | 1.04             | 1.19             |           |
|          |           | SC02-1.21 | 907  | 14  | 0.081563           |     | 0.002815           |     | 0.282596           | 0.000015 | 12.14 |     | 1.05             | 1.02             |           |
|          |           | SC02-1.22 | 850  | 13  | 0.102315           |     | 0.003161           |     | 0.282578           | 0.000014 | 10.12 |     | 0.94             | 1.10             |           |
|          |           | SC02-1.24 | 853  | 13  | 0.097645           |     | 0.002664           |     | 0.28256            | 0.000014 | 9.84  |     | 0.99             | 1.12             |           |
|          |           | SC02-1.26 | 846  | 13  | 0.083107           |     | 0.00258            |     | 0.282569           | 0.000013 | 10.07 |     | 0.90             | 1.10             |           |
|          |           | SC02-1.27 | 845  | 13  | 0.04025            |     | 0.001028           |     | 0.282511           | 0.000013 | 8.87  |     | 0.89             | 1.18             |           |
|          |           | SC02-1.30 | 902  | 14  | 0.046031           |     | 0.001629           |     | 0.282537           | 0.000011 | 10.63 |     | 0.77             | 1.11             |           |
|          |           | SC02-1.33 | 842  | 13  | 0.051184           |     | 0.001782           |     | 0.282538           | 0.000014 | 9.32  |     | 0.95             | 1.15             |           |
|          |           | SC02-1.35 | 847  | 13  | 0.049093           |     | 0.001634           |     | 0.282423           | 0.000013 | 5.44  |     | 0.92             | 1.40             |           |
|          |           | SC09-3.01 | 797  | 12  | 0.024253           |     | 0.000617           |     | 0.282353           | 0.000010 | 2.44  |     | 0.71             | 1.55             |           |
|          |           | SC09-3.02 | 798  | 11  | 0.018457           |     | 0.000393           |     | 0.282299           | 0.000013 | 0.68  |     | 0.91             | 1.67             |           |
|          |           | SC09-3.03 | 803  | 11  | 0.038314           |     | 0.000847           |     | 0.282327           | 0.000011 | 1.54  |     | 0.73             | 1.61             |           |
|          |           | SC09-3.04 | 809  | 12  | 0.024126           |     | 0.000579           |     | 0.282372           | 0.000013 | 3.38  |     | 0.87             | 1.50             |           |
|          |           | SC09-3.05 | 800  | 11  | 0.045431           |     | 0.001223           |     | 0.282375           | 0.000011 | 2.96  |     | 0.72             | 1.52             |           |
|          |           | SC09-3.06 | 808  | 11  | 0.030489           |     | 0.000992           |     | 0.282388           | 0.000011 | 3.71  |     | 0.78             | 1.48             |           |
|          |           | SC09-3.07 | 799  | 11  | 0.01989            |     | 0.000466           |     | 0.282386           | 0.000011 | 3.74  |     | 0.79             | 1.47             |           |
|          |           | SC09-3.08 | 800  | 11  | 0.011909           |     | 0.000435           |     | 0.282309           | 0.000018 | 1.04  |     | 1.24             | 1.64             |           |
|          |           | SC09-3.09 | 799  | 11  | 0.010517           |     | 0.000372           |     | 0.282381           | 0.000014 | 3.60  |     | 0.95             | 1.48             |           |
|          |           | SC09-3.10 | 800  | 11  | 0.038366           |     | 0.00082            |     | 0.282374           | 0.000012 | 3.15  |     | 0.85             | 1.51             |           |
|          |           | SC09-3.11 | 806  | 11  | 0.05487            |     | 0.001219           |     | 0.282306           | 0.000010 | 0.64  |     | 0.70             | 1.67             |           |
|          |           | SC09-3.12 | 803  | 11  | 0.068791           |     | 0.001993           |     | 0.282309           | 0.000015 | 0.29  |     | 1.02             | 1.69             |           |
|          |           | SC09-3.13 | 809  | 11  | 0.03226            |     | 0.000964           |     | 0.282355           | 0.000016 | 2.58  |     | 1.09             | 1.55             |           |
|          |           | SC09-3.14 | 907  | 15  | 0.043922           |     | 0.001238           |     | 0.282387           | 0.000015 | 5.66  |     | 1.04             | 1.43             |           |

**Table S4: The isotope results for the Neoproterozoic mafic and adakitic pluton in the western margin of the Yangtze Block**

| Locality              | Rock type         | Spot     | Best |               | Isotopic ratio     |               |                    |               |                    |               | $\epsilon_{\text{Hf}}$ | $\pm 1\sigma$ | $T_{\text{DM1}}$ | $T_{\text{DM2}}$ | Reference |  |  |
|-----------------------|-------------------|----------|------|---------------|--------------------|---------------|--------------------|---------------|--------------------|---------------|------------------------|---------------|------------------|------------------|-----------|--|--|
|                       |                   |          | age  |               | $^{176}\text{Yb}/$ |               | $^{176}\text{Lu}/$ |               | $^{176}\text{Hf}/$ |               |                        |               |                  |                  |           |  |  |
|                       |                   |          |      |               | $^{177}\text{Hf}$  | $\pm 1\sigma$ | $^{177}\text{Hf}$  | $\pm 1\sigma$ | $^{177}\text{Hf}$  | $\pm 1\sigma$ |                        |               |                  |                  |           |  |  |
|                       |                   |          | (Ma) | $\pm 1\sigma$ |                    |               |                    |               |                    |               |                        |               |                  |                  |           |  |  |
| Guandaoshan intrusion | gabbro-diorite    | GDS10-1  | 856  |               | 0.115207           | 0.000393      | 0.004541           | 0.000011      | 0.282774           | 0.000021      | 13.81                  | 0.75          | 863.00           | Zhu et al., 2021 |           |  |  |
|                       |                   | GDS10-2  | 856  |               | 0.020238           | 0.000172      | 0.001044           | 0.000006      | 0.28264            | 0.000014      | 13.04                  | 0.49          | 893.00           |                  |           |  |  |
|                       |                   | GDS10-3  | 856  |               | 0.075065           | 0.000180      | 0.003107           | 0.000003      | 0.2827             | 0.000017      | 12.83                  | 0.60          | 904.00           |                  |           |  |  |
|                       |                   | GDS10-4  | 856  |               | 0.129986           | 0.000505      | 0.005074           | 0.000018      | 0.282796           | 0.000020      | 13.97                  | 0.69          | 856.00           |                  |           |  |  |
|                       |                   | GDS10-5  | 856  |               | 0.060891           | 0.000322      | 0.002757           | 0.000018      | 0.282729           | 0.000017      | 14.27                  | 0.60          | 844.00           |                  |           |  |  |
|                       |                   | GDS10-6  | 856  |               | 0.065506           | 0.000130      | 0.002766           | 0.000003      | 0.28272            | 0.000018      | 13.92                  | 0.62          | 858.00           |                  |           |  |  |
|                       |                   | GDS10-7  | 856  |               | 0.031219           | 0.000242      | 0.00145            | 0.000010      | 0.282807           | 0.000016      | 18.52                  | 0.55          | 672.00           |                  |           |  |  |
|                       |                   | GDS10-8  | 856  |               | 0.08395            | 0.000171      | 0.00332            | 0.000008      | 0.282706           | 0.000016      | 12.80                  | 0.57          | 906.00           |                  |           |  |  |
|                       |                   | GDS10-9  | 856  |               | 0.111551           | 0.000298      | 0.004465           | 0.000010      | 0.282721           | 0.000019      | 12.02                  | 0.67          | 942.00           |                  |           |  |  |
|                       |                   | GDS10-10 | 856  |               | 0.05831            | 0.000251      | 0.002564           | 0.000006      | 0.282778           | 0.000018      | 16.21                  | 0.65          | 763.00           |                  |           |  |  |
|                       |                   | GDS10-11 | 856  |               | 0.099093           | 0.000459      | 0.003981           | 0.000013      | 0.28271            | 0.000020      | 12.20                  | 0.70          | 933.00           |                  |           |  |  |
|                       |                   | GDS10-12 | 856  |               | 0.034218           | 0.000364      | 0.001435           | 0.000014      | 0.282646           | 0.000014      | 12.82                  | 0.50          | 902.00           |                  |           |  |  |
|                       |                   | GDS10-13 | 856  |               | 0.113578           | 0.000037      | 0.004437           | 0.000002      | 0.282743           | 0.000019      | 12.83                  | 0.65          | 906.00           |                  |           |  |  |
|                       |                   | GDS10-14 | 856  |               | 0.088134           | 0.000525      | 0.003656           | 0.000016      | 0.282604           | 0.000021      | 8.80                   | 0.72          | 1077.00          |                  |           |  |  |
|                       |                   | GDS10-15 | 856  |               | 0.032825           | 0.000252      | 0.001358           | 0.000011      | 0.282649           | 0.000015      | 13.02                  | 0.53          | 894.00           |                  |           |  |  |
|                       |                   | GDS10-16 | 856  |               | 0.083066           | 0.000245      | 0.003515           | 0.000012      | 0.282749           | 0.000022      | 14.11                  | 0.77          | 850.00           |                  |           |  |  |
|                       |                   | GDS10-17 | 856  |               | 0.059122           | 0.000795      | 0.002614           | 0.000031      | 0.282581           | 0.000024      | 9.19                   | 0.83          | 1054.00          |                  |           |  |  |
|                       |                   | GDS10-18 | 856  |               | 0.050268           | 0.000234      | 0.002414           | 0.000006      | 0.282675           | 0.000021      | 12.72                  | 0.72          | 908.00           |                  |           |  |  |
|                       |                   | GDS10-19 | 856  |               | 0.050391           | 0.000086      | 0.0022             | 0.000002      | 0.282657           | 0.000020      | 12.34                  | 0.69          | 923.00           |                  |           |  |  |
|                       |                   | GDS10-20 | 856  |               | 0.042932           | 0.000177      | 0.001828           | 0.000006      | 0.282658           | 0.000019      | 12.81                  | 0.66          | 903.00           |                  |           |  |  |
|                       |                   | GDS10-21 | 856  |               | 0.047636           | 0.000214      | 0.002463           | 0.000013      | 0.282641           | 0.000030      | 11.48                  | 1.05          | 959.00           |                  |           |  |  |
|                       |                   | GDS10-22 | 856  |               | 0.058904           | 0.000162      | 0.002688           | 0.000007      | 0.282906           | 0.000025      | 20.61                  | 0.88          | 579.00           |                  |           |  |  |
|                       |                   | GDS10-23 | 856  |               | 0.040206           | 0.000168      | 0.00176            | 0.000008      | 0.282665           | 0.000018      | 13.13                  | 0.63          | 890.00           |                  |           |  |  |
| Ganyuhe intrusions    | hornblende gabbro | GYH1-1   | 857  |               | 0.02587            | 0.000064      | 0.001051           | 0.000002      | 0.282595           | 0.000011      | 11.47                  | 0.40          | 956.00           |                  |           |  |  |
|                       |                   | GYH1-2   | 857  |               | 0.034043           | 0.000082      | 0.00134            | 0.000003      | 0.282674           | 0.000013      | 13.94                  | 0.46          | 858.00           |                  |           |  |  |
|                       |                   | GYH1-3   | 857  |               | 0.026995           | 0.000129      | 0.00109            | 0.000006      | 0.282715           | 0.000010      | 15.70                  | 0.35          | 788.00           |                  |           |  |  |
|                       |                   | GYH1-4   | 857  |               | 0.021953           | 0.000058      | 0.000877           | 0.000003      | 0.282634           | 0.000012      | 13.05                  | 0.40          | 893.00           |                  |           |  |  |
|                       |                   | GYH1-5   | 857  |               | 0.031316           | 0.000131      | 0.001243           | 0.000004      | 0.282727           | 0.000010      | 15.95                  | 0.34          | 778.00           |                  |           |  |  |
|                       |                   | GYH1-6   | 857  |               | 0.016359           | 0.000112      | 0.000683           | 0.000005      | 0.282608           | 0.000011      | 12.35                  | 0.38          | 921.00           |                  |           |  |  |

**Table S4: The isotope results for the Neoproterozoic mafic and adakitic pluton in the western margin of the Yangtze Block**

| Locality | Rock type | Spot    | Best |                    | Isotopic ratio |                    |          |                    |          |                   | εHf   | ±1σ  | T <sub>DM1</sub> | T <sub>DM2</sub> | Reference |
|----------|-----------|---------|------|--------------------|----------------|--------------------|----------|--------------------|----------|-------------------|-------|------|------------------|------------------|-----------|
|          |           |         | age  | <sup>176</sup> Yb/ |                | <sup>176</sup> Lu/ |          | <sup>176</sup> Hf/ |          |                   |       |      |                  |                  |           |
|          |           |         |      | (Ma)               | ±1σ            | <sup>177</sup> Hf  | ±1σ      | <sup>177</sup> Hf  | ±1σ      | <sup>177</sup> Hf |       |      |                  |                  |           |
|          |           | GYH1-7  | 857  |                    | 0.019455       | 0.000076           | 0.000781 | 0.000004           | 0.282702 | 0.000009          | 15.57 | 0.29 | 794.00           |                  |           |
|          |           | GYH1-8  | 857  |                    | 0.018733       | 0.000124           | 0.000771 | 0.000006           | 0.282636 | 0.000010          | 13.26 | 0.36 | 885.00           |                  |           |
|          |           | GYH1-9  | 857  |                    | 0.017865       | 0.000059           | 0.000724 | 0.000003           | 0.282683 | 0.000011          | 14.96 | 0.37 | 818.00           |                  |           |
|          |           | GYH1-10 | 857  |                    | 0.018822       | 0.000069           | 0.000758 | 0.000003           | 0.28259  | 0.000011          | 11.65 | 0.37 | 949.00           |                  |           |
|          |           | GYH1-11 | 857  |                    | 0.027861       | 0.000070           | 0.001108 | 0.000003           | 0.282675 | 0.000012          | 14.23 | 0.41 | 846.00           |                  |           |
|          |           | GYH1-12 | 857  |                    | 0.016553       | 0.000110           | 0.000664 | 0.000004           | 0.28271  | 0.000011          | 15.99 | 0.38 | 777.00           |                  |           |
|          |           | GYH1-13 | 857  |                    | 0.028091       | 0.000044           | 0.001098 | 0.000002           | 0.282595 | 0.000010          | 11.41 | 0.36 | 959.00           |                  |           |
|          |           | GYH1-14 | 857  |                    | 0.035511       | 0.000053           | 0.001372 | 0.000002           | 0.282545 | 0.000011          | 9.34  | 0.38 | 1043.00          |                  |           |
|          |           | GYH1-15 | 857  |                    | 0.015633       | 0.000094           | 0.000652 | 0.000004           | 0.28267  | 0.000010          | 14.58 | 0.36 | 833.00           |                  |           |
|          |           | GYH1-16 | 857  |                    | 0.025111       | 0.000132           | 0.001024 | 0.000006           | 0.282666 | 0.000011          | 14.02 | 0.38 | 855.00           |                  |           |
|          |           | GYH1-17 | 857  |                    | 0.021925       | 0.000048           | 0.000915 | 0.000003           | 0.282582 | 0.000011          | 11.16 | 0.37 | 968.00           |                  |           |
|          |           | GYH1-18 | 857  |                    | 0.019353       | 0.000027           | 0.00079  | 0.000001           | 0.282668 | 0.000010          | 14.37 | 0.34 | 841.00           |                  |           |
|          |           | GYH1-19 | 857  |                    | 0.022715       | 0.000072           | 0.000914 | 0.000003           | 0.282681 | 0.000010          | 14.67 | 0.35 | 829.00           |                  |           |
|          |           | GYH1-20 | 857  |                    | 0.02355        | 0.000110           | 0.000974 | 0.000004           | 0.282508 | 0.000014          | 8.48  | 0.49 | 1075.00          |                  |           |
|          |           | GYH1-21 | 857  |                    | 0.017605       | 0.000015           | 0.000727 | 0.000001           | 0.282597 | 0.000010          | 11.92 | 0.36 | 938.00           |                  |           |
|          |           | GYH1-22 | 857  |                    | 0.014557       | 0.000056           | 0.000613 | 0.000003           | 0.282694 | 0.000010          | 15.48 | 0.33 | 797.00           |                  |           |
|          |           | GYH1-23 | 857  |                    | 0.027135       | 0.000247           | 0.001118 | 0.000010           | 0.282675 | 0.000010          | 14.23 | 0.36 | 846.00           |                  |           |
|          |           | GYH1-24 | 857  |                    | 0.017478       | 0.000098           | 0.00075  | 0.000003           | 0.282597 | 0.000012          | 11.91 | 0.41 | 938.00           |                  |           |
|          |           | GYH1-25 | 857  |                    | 0.022071       | 0.000122           | 0.000881 | 0.000005           | 0.282618 | 0.000009          | 12.48 | 0.32 | 916.00           |                  |           |
|          |           | GYH1-26 | 857  |                    | 0.023078       | 0.000094           | 0.000906 | 0.000003           | 0.28262  | 0.000011          | 12.53 | 0.40 | 914.00           |                  |           |
|          |           | GYH1-27 | 857  |                    | 0.028978       | 0.000175           | 0.001132 | 0.000007           | 0.28255  | 0.000011          | 9.78  | 0.37 | 1024.00          |                  |           |
|          |           | GYH1-28 | 857  |                    | 0.029459       | 0.000039           | 0.001299 | 0.000001           | 0.2826   | 0.000016          | 11.39 | 0.55 | 961.00           |                  |           |
|          |           | GYH1-29 | 857  |                    | 0.026877       | 0.000104           | 0.00113  | 0.000003           | 0.282636 | 0.000012          | 12.85 | 0.41 | 902.00           |                  |           |
|          |           | GYH1-30 | 857  |                    | 0.013406       | 0.000051           | 0.00061  | 0.000004           | 0.282586 | 0.000012          | 11.65 | 0.41 | 948.00           |                  |           |
|          |           | GYH1-31 | 857  |                    | 0.02247        | 0.000041           | 0.000888 | 0.000002           | 0.282648 | 0.000010          | 13.53 | 0.35 | 874.00           |                  |           |
|          |           | GYH1-32 | 857  |                    | 0.0326         | 0.000040           | 0.001294 | 0.000002           | 0.282689 | 0.000011          | 14.54 | 0.40 | 834.00           |                  |           |
|          |           | GYH1-33 | 857  |                    | 0.034661       | 0.000073           | 0.001442 | 0.000004           | 0.282588 | 0.000013          | 10.80 | 0.46 | 985.00           |                  |           |
|          |           | GYH1-34 | 857  |                    | 0.014299       | 0.000051           | 0.000614 | 0.000003           | 0.282682 | 0.000011          | 15.07 | 0.39 | 813.00           |                  |           |
|          |           | GYH1-35 | 857  |                    | 0.013037       | 0.000036           | 0.000565 | 0.000002           | 0.282582 | 0.000012          | 11.58 | 0.42 | 951.00           |                  |           |

**Table S4: The isotope results for the Neoproterozoic mafic and adakitic pluton in the western margin of the Yangtze Block**

| Locality              | Rock type      | Spot        | Best |               | Isotopic ratio     |               |                    |               |                    |               | $\epsilon_{\text{Hf}}$ | $\pm 1\sigma$ | $T_{\text{DM1}}$ | $T_{\text{DM2}}$ | Reference         |  |  |
|-----------------------|----------------|-------------|------|---------------|--------------------|---------------|--------------------|---------------|--------------------|---------------|------------------------|---------------|------------------|------------------|-------------------|--|--|
|                       |                |             | age  |               | $^{176}\text{Yb}/$ |               | $^{176}\text{Lu}/$ |               | $^{176}\text{Hf}/$ |               |                        |               |                  |                  |                   |  |  |
|                       |                |             |      |               | $^{177}\text{Hf}$  | $\pm 1\sigma$ | $^{177}\text{Hf}$  | $\pm 1\sigma$ | $^{177}\text{Hf}$  | $\pm 1\sigma$ |                        |               |                  |                  |                   |  |  |
|                       |                |             | (Ma) | $\pm 1\sigma$ |                    |               |                    |               |                    |               |                        |               |                  |                  |                   |  |  |
| Dajianshan intrusions | gabbro-diorite | GYH1-36     | 857  |               | 0.015108           | 0.000054      | 0.000649           | 0.000004      | 0.282594           | 0.000010      | 11.91                  | 0.36          | 938.00           |                  | Zhu et al., 2019  |  |  |
|                       |                | DJS1-1      | 810  |               | 0.021981           | 0.000171      | 0.000759           | 0.000006      | 0.282521           | 0.000010      | 8.18                   | 0.34          | 1045.00          | 1187.00          |                   |  |  |
|                       |                | DJS1-2      | 810  |               | 0.013462           | 0.000023      | 0.000486           | 0.000001      | 0.282505           | 0.000008      | 7.90                   | 0.27          | 1054.00          | 1204.00          |                   |  |  |
|                       |                | DJS1-3      | 810  |               | 0.016782           | 0.000166      | 0.000611           | 0.000005      | 0.282468           | 0.000009      | 6.48                   | 0.31          | 1111.00          | 1294.00          |                   |  |  |
|                       |                | DJS1-4      | 810  |               | 0.022973           | 0.000073      | 0.000778           | 0.000003      | 0.282468           | 0.000009      | 6.29                   | 0.30          | 1120.00          | 1306.00          |                   |  |  |
|                       |                | DJS1-5      | 810  |               | 0.014931           | 0.000116      | 0.000528           | 0.000004      | 0.282503           | 0.000008      | 7.80                   | 0.29          | 1059.00          | 1211.00          |                   |  |  |
|                       |                | DJS1-6      | 810  |               | 0.014392           | 0.000031      | 0.000501           | 0.000001      | 0.282446           | 0.000009      | 5.81                   | 0.32          | 1136.00          | 1336.00          |                   |  |  |
| Qizanmi intrusions    | gabbro         | DJS1-7      | 810  |               | 0.018272           | 0.000126      | 0.000656           | 0.000005      | 0.28247            | 0.000009      | 6.49                   | 0.30          | 1111.00          | 1293.00          | Liu et al., 2019  |  |  |
|                       |                | 11AL15-1-1  | 748  |               | 0.282456           | 0.000016      | 0.0006             | 0.000032      | 0.017113           | 0.000877      | 4.80                   |               | 1120.00          |                  |                   |  |  |
|                       |                | 11AL15-1-2  | 748  |               | 0.282482           | 0.000013      | 0.000862           | 0.000013      | 0.024473           | 0.000295      | 5.50                   |               | 1090.00          |                  |                   |  |  |
|                       |                | 11AL15-1-3  | 748  |               | 0.282456           | 0.000021      | 0.000735           | 0.000028      | 0.024572           | 0.000959      | 4.70                   |               | 1120.00          |                  |                   |  |  |
|                       |                | 11AL15-1-4  | 748  |               | 0.28245            | 0.000019      | 0.000709           | 0.000021      | 0.021215           | 0.000299      | 4.50                   |               | 1130.00          |                  |                   |  |  |
|                       |                | 11AL15-1-5  | 748  |               | 0.282459           | 0.000020      | 0.0006             | 0.000007      | 0.021716           | 0.000392      | 4.90                   |               | 1110.00          |                  |                   |  |  |
|                       |                | 11AL15-1-6  | 748  |               | 0.282463           | 0.000024      | 0.001155           | 0.000047      | 0.03347            | 0.000965      | 4.70                   |               | 1120.00          |                  |                   |  |  |
|                       |                | 11AL15-1-7  | 748  |               | 0.282474           | 0.000022      | 0.001052           | 0.000066      | 0.034565           | 0.002352      | 5.20                   |               | 1100.00          |                  |                   |  |  |
|                       |                | 11AL15-1-8  | 748  |               | 0.28247            | 0.000018      | 0.000544           | 0.000008      | 0.016446           | 0.000233      | 5.30                   |               | 1090.00          |                  |                   |  |  |
|                       |                | 11AL15-1-9  | 748  |               | 0.282454           | 0.000016      | 0.000274           | 0.000004      | 0.008786           | 0.000118      | 4.90                   |               | 1110.00          |                  |                   |  |  |
|                       |                | 11AL15-1-10 | 748  |               | 0.28248            | 0.000019      | 0.000478           | 0.000015      | 0.013223           | 0.000451      | 5.70                   |               | 1080.00          |                  |                   |  |  |
|                       |                | 11AL15-1-12 | 748  |               | 0.282463           | 0.000014      | 0.000761           | 0.000015      | 0.023468           | 0.000633      | 4.90                   |               | 1110.00          |                  |                   |  |  |
|                       |                | 11AL15-1-13 | 748  |               | 0.282489           | 0.000016      | 0.000574           | 0.000021      | 0.015989           | 0.000682      | 6.00                   |               | 1070.00          |                  |                   |  |  |
| Baoxing intrusions    |                | HSH5-1      | 857  |               | 0.034608           | 0.000759      | 0.000819           | 0.000009      | 0.282560           | 0.000017      | 10.99                  | 0.59          | 0.97             | 1.05             | Zhao et al., 2019 |  |  |
|                       |                | HSH5-2      | 863  |               | 0.025250           | 0.001200      | 0.000623           | 0.000017      | 0.282555           | 0.000017      | 11.04                  | 0.58          | 0.98             | 1.05             |                   |  |  |
|                       |                | HSH5-3      | 868  |               | 0.068524           | 0.000705      | 0.001748           | 0.000023      | 0.282572           | 0.000016      | 11.13                  | 0.57          | 0.98             | 1.05             |                   |  |  |
|                       |                | HSH5-4      | 807  |               | 0.052805           | 0.000510      | 0.001811           | 0.000016      | 0.282587           | 0.000019      | 10.32                  | 0.68          | 0.96             | 1.06             |                   |  |  |
|                       |                | HSH5-5      | 858  |               | 0.037348           | 0.000931      | 0.000896           | 0.000014      | 0.282583           | 0.000014      | 11.78                  | 0.48          | 0.94             | 1.00             |                   |  |  |
|                       |                | HSH5-6      | 870  |               | 0.021582           | 0.000270      | 0.000485           | 0.000001      | 0.282564           | 0.000013      | 11.63                  | 0.45          | 0.96             | 1.02             |                   |  |  |
|                       |                | HSH5-7      | 867  |               | 0.035697           | 0.000546      | 0.000850           | 0.000026      | 0.282548           | 0.000015      | 10.77                  | 0.53          | 0.99             | 1.07             |                   |  |  |
|                       |                | HSH5-8      | 863  |               | 0.029121           | 0.000682      | 0.000692           | 0.000027      | 0.282607           | 0.000018      | 12.85                  | 0.64          | 0.91             | 0.94             |                   |  |  |
|                       |                | HSH5-9      | 854  |               | 0.065074           | 0.000572      | 0.001567           | 0.000030      | 0.282596           | 0.000014      | 11.76                  | 0.48          | 0.94             | 1.00             |                   |  |  |

**Table S4: The isotope results for the Neoproterozoic mafic and adakitic pluton in the western margin of the Yangtze Block**

| Locality | Rock type | Spot     | Best |     | Isotopic ratio     |          |                    |          |                    |          | εHf   | ±1σ  | T <sub>DM1</sub> | T <sub>DM2</sub> | Reference |  |  |
|----------|-----------|----------|------|-----|--------------------|----------|--------------------|----------|--------------------|----------|-------|------|------------------|------------------|-----------|--|--|
|          |           |          | age  |     | <sup>176</sup> Yb/ |          | <sup>176</sup> Lu/ |          | <sup>176</sup> Hf/ |          |       |      |                  |                  |           |  |  |
|          |           |          |      |     | <sup>177</sup> Hf  | ±1σ      | <sup>177</sup> Hf  | ±1σ      | <sup>177</sup> Hf  | ±1σ      |       |      |                  |                  |           |  |  |
|          |           |          | (Ma) | ±1σ |                    |          |                    |          |                    |          |       |      | (Ma)             | (Ma)             |           |  |  |
|          |           | HSH5-10  | 866  |     | 0.057384           | 0.000516 | 0.001429           | 0.000025 | 0.282575           | 0.000017 | 11.38 | 0.59 | 0.97             | 1.03             |           |  |  |
|          |           | HSH5-11  | 885  |     | 0.070301           | 0.000599 | 0.001664           | 0.000031 | 0.282576           | 0.000015 | 11.69 | 0.54 | 0.97             | 1.03             |           |  |  |
|          |           | HSH5-12  | 880  |     | 0.043982           | 0.001141 | 0.001045           | 0.000017 | 0.282568           | 0.000016 | 11.65 | 0.55 | 0.97             | 1.03             |           |  |  |
|          |           | HSH5-13  | 897  |     | 0.035256           | 0.000327 | 0.000878           | 0.000008 | 0.282567           | 0.000017 | 12.09 | 0.59 | 0.97             | 1.01             |           |  |  |
|          |           | HSH5-14  | 857  |     | 0.102830           | 0.002653 | 0.002191           | 0.000025 | 0.282586           | 0.000016 | 11.14 | 0.56 | 0.97             | 1.04             |           |  |  |
|          |           | HSH5-15  | 850  |     | 0.068857           | 0.003786 | 0.001525           | 0.000064 | 0.282604           | 0.000013 | 12.01 | 0.47 | 0.93             | 0.98             |           |  |  |
|          |           | HSH5-16  | 881  |     | 0.055282           | 0.000613 | 0.001334           | 0.000021 | 0.282627           | 0.000018 | 13.60 | 0.63 | 0.89             | 0.90             |           |  |  |
|          |           | HSH5-17  | 891  |     | 0.036648           | 0.000809 | 0.000898           | 0.000005 | 0.282575           | 0.000014 | 12.24 | 0.49 | 0.95             | 1.00             |           |  |  |
|          |           | HSH5-18  | 887  |     | 0.039231           | 0.000485 | 0.001114           | 0.000033 | 0.282587           | 0.000015 | 12.43 | 0.51 | 0.94             | 0.98             |           |  |  |
|          |           | HSH5-19  | 869  |     | 0.062010           | 0.000721 | 0.002045           | 0.000037 | 0.282665           | 0.000025 | 14.24 | 0.88 | 0.86             | 0.85             |           |  |  |
|          |           | HSH5-20  | 873  |     | 0.049809           | 0.002317 | 0.001370           | 0.000100 | 0.282563           | 0.000018 | 11.12 | 0.64 | 0.98             | 1.06             |           |  |  |
|          |           | HSH5-21  | 895  |     | 0.033473           | 0.000311 | 0.000783           | 0.000006 | 0.282563           | 0.000016 | 11.95 | 0.55 | 0.97             | 1.02             |           |  |  |
|          |           | HSH5-22  | 875  |     | 0.036774           | 0.000947 | 0.001084           | 0.000053 | 0.282587           | 0.000017 | 12.17 | 0.58 | 0.94             | 0.99             |           |  |  |
|          |           | HSH5-23  | 855  |     | 0.022407           | 0.000239 | 0.000754           | 0.000013 | 0.282583           | 0.000018 | 11.82 | 0.63 | 0.94             | 1.00             |           |  |  |
|          |           | HSH5-24  | 952  |     | 0.053056           | 0.001872 | 0.001227           | 0.000021 | 0.282545           | 0.000020 | 12.27 | 0.68 | 1.01             | 1.04             |           |  |  |
|          |           | HSH5-25  | 831  |     | 0.037393           | 0.001314 | 0.001216           | 0.000043 | 0.282578           | 0.000025 | 10.83 | 0.86 | 0.96             | 1.04             |           |  |  |
|          |           | HSH5-26  | 861  |     | 0.066802           | 0.000367 | 0.001951           | 0.000037 | 0.282617           | 0.000026 | 12.45 | 0.90 | 0.92             | 0.96             |           |  |  |
|          |           | HSH5-27  | 893  |     | 0.043222           | 0.001035 | 0.001217           | 0.000060 | 0.282590           | 0.000017 | 12.62 | 0.59 | 0.94             | 0.97             |           |  |  |
|          |           | HSH5-28  | 885  |     | 0.021656           | 0.000070 | 0.000530           | 0.000009 | 0.282532           | 0.000017 | 10.76 | 0.61 | 1.01             | 1.09             |           |  |  |
|          |           | HSH21-1  | 883  |     | 0.071246           | 0.000600 | 0.001654           | 0.000021 | 0.282580           | 0.000014 | 11.80 | 0.50 | 0.97             | 1.02             |           |  |  |
|          |           | HSH21-2  | 880  |     | 0.073899           | 0.000332 | 0.001790           | 0.000021 | 0.282586           | 0.000017 | 11.86 | 0.61 | 0.96             | 1.01             |           |  |  |
|          |           | HSH21-3  | 866  |     | 0.068013           | 0.001277 | 0.001583           | 0.000017 | 0.282575           | 0.000014 | 11.28 | 0.50 | 0.97             | 1.04             |           |  |  |
|          |           | HSH21-4  | 863  |     | 0.089497           | 0.001417 | 0.002121           | 0.000033 | 0.282566           | 0.000016 | 10.57 | 0.57 | 1.00             | 1.08             |           |  |  |
|          |           | HSH21-5  | 859  |     | 0.061647           | 0.000633 | 0.001461           | 0.000025 | 0.282610           | 0.000014 | 12.46 | 0.50 | 0.92             | 0.96             |           |  |  |
|          |           | HSH21-6  | 873  |     | 0.073243           | 0.000705 | 0.001732           | 0.000014 | 0.282592           | 0.000016 | 11.95 | 0.57 | 0.95             | 1.00             |           |  |  |
|          |           | HSH21-7  | 846  |     | 0.025732           | 0.000460 | 0.000663           | 0.000008 | 0.282566           | 0.000016 | 11.06 | 0.57 | 0.96             | 1.04             |           |  |  |
|          |           | HSH21-8  | 821  |     | 0.054613           | 0.000775 | 0.001468           | 0.000062 | 0.282587           | 0.000015 | 10.79 | 0.52 | 0.95             | 1.04             |           |  |  |
|          |           | HSH21-9  | 862  |     | 0.084427           | 0.001313 | 0.001942           | 0.000051 | 0.282641           | 0.000015 | 13.30 | 0.53 | 0.89             | 0.91             |           |  |  |
|          |           | HSH21-10 | 863  |     | 0.069993           | 0.001195 | 0.001620           | 0.000024 | 0.282590           | 0.000015 | 11.71 | 0.53 | 0.95             | 1.01             |           |  |  |



**Table S4: The isotope results for the Neoproterozoic mafic and adakitic pluton in the western margin of the Yangtze Block**

| Locality          | Rock type | Spot     | Best |               | Isotopic ratio     |               |                    |               |                    |               | $\epsilon$ Hf | $\pm 1\sigma$ | $T_{DM1}$ | $T_{DM2}$ | Reference |
|-------------------|-----------|----------|------|---------------|--------------------|---------------|--------------------|---------------|--------------------|---------------|---------------|---------------|-----------|-----------|-----------|
|                   |           |          | age  |               | $^{176}\text{Yb}/$ |               | $^{176}\text{Lu}/$ |               | $^{176}\text{Hf}/$ |               |               |               |           |           |           |
|                   |           |          | (Ma) | $\pm 1\sigma$ | $^{177}\text{Hf}$  | $\pm 1\sigma$ | $^{177}\text{Hf}$  | $\pm 1\sigma$ | $^{177}\text{Hf}$  | $\pm 1\sigma$ |               |               |           |           |           |
| Tongde intrusions |           | HSH21-11 | 831  |               | 0.064002           | 0.001169      | 0.001455           | 0.000019      | 0.282576           | 0.000016      | 10.63         | 0.55          | 0.97      | 1.05      |           |
|                   |           | HSH21-12 | 867  |               | 0.077393           | 0.002112      | 0.001753           | 0.000059      | 0.282619           | 0.000013      | 12.75         | 0.46          | 0.91      | 0.95      |           |
|                   |           | HSH21-13 | 879  |               | 0.084667           | 0.000866      | 0.002035           | 0.000032      | 0.282634           | 0.000017      | 13.37         | 0.58          | 0.90      | 0.91      |           |
|                   |           | HSH21-14 | 861  |               | 0.073376           | 0.001321      | 0.001750           | 0.000044      | 0.282576           | 0.000015      | 11.11         | 0.53          | 0.98      | 1.05      |           |
|                   |           | HSH21-15 | 883  |               | 0.062247           | 0.001370      | 0.001461           | 0.000039      | 0.282598           | 0.000016      | 12.52         | 0.54          | 0.94      | 0.97      |           |
|                   |           | HSH21-16 | 860  |               | 0.069584           | 0.003394      | 0.001654           | 0.000046      | 0.282598           | 0.000019      | 11.95         | 0.67          | 0.94      | 0.99      |           |
|                   |           | HSH21-17 | 839  |               | 0.089395           | 0.000424      | 0.002112           | 0.000017      | 0.282574           | 0.000014      | 10.40         | 0.50          | 0.99      | 1.08      |           |
|                   |           | HSH21-18 | 901  |               | 0.078845           | 0.002446      | 0.001816           | 0.000061      | 0.282623           | 0.000014      | 13.58         | 0.50          | 0.91      | 0.92      |           |
|                   |           | HSH21-19 | 887  |               | 0.081536           | 0.001166      | 0.001866           | 0.000027      | 0.282621           | 0.000014      | 13.20         | 0.49          | 0.91      | 0.93      |           |
|                   |           | HSH21-20 | 900  |               | 0.064979           | 0.002017      | 0.001491           | 0.000027      | 0.282548           | 0.000017      | 11.10         | 0.59          | 1.01      | 1.08      |           |
|                   |           | HSH21-21 | 890  |               | 0.078803           | 0.001347      | 0.001868           | 0.000032      | 0.282670           | 0.000016      | 14.98         | 0.57          | 0.84      | 0.82      |           |
|                   |           | HSH21-22 | 874  |               | 0.053779           | 0.000445      | 0.001256           | 0.000016      | 0.282623           | 0.000015      | 13.34         | 0.54          | 0.90      | 0.91      |           |
|                   |           | HSH21-23 | 878  |               | 0.068564           | 0.001707      | 0.001635           | 0.000044      | 0.282607           | 0.000016      | 12.65         | 0.56          | 0.93      | 0.96      |           |
|                   |           | HSH21-24 | 898  |               | 0.057357           | 0.000621      | 0.001376           | 0.000019      | 0.282644           | 0.000015      | 14.53         | 0.54          | 0.87      | 0.85      |           |
|                   |           | HSH21-25 | 897  |               | 0.073861           | 0.001829      | 0.001886           | 0.000020      | 0.282555           | 0.000019      | 11.05         | 0.65          | 1.01      | 1.08      |           |
|                   |           | HSH21-26 | 900  |               | 0.078818           | 0.001791      | 0.002008           | 0.000041      | 0.282636           | 0.000015      | 13.90         | 0.53          | 0.90      | 0.90      |           |
|                   |           | HSH21-27 | 909  |               | 0.078086           | 0.001908      | 0.001812           | 0.000058      | 0.282636           | 0.000012      | 14.23         | 0.41          | 0.89      | 0.88      |           |
|                   |           | HSH21-28 | 853  |               | 0.063041           | 0.000632      | 0.001490           | 0.000016      | 0.282617           | 0.000012      | 12.54         | 0.43          | 0.91      | 0.95      |           |
|                   |           | HSH21-29 | 852  |               | 0.056415           | 0.001300      | 0.001371           | 0.000017      | 0.282598           | 0.000015      | 11.92         | 0.53          | 0.93      | 0.99      |           |
|                   |           | TD2-1    | 857  |               | 0.023143           | 0.000370      | 0.000452           | 0.000003      | 0.282440           | 0.000018      | 6.94          | 0.64          | 1.13      | 1.31      |           |
|                   |           | TD2-2    | 843  |               | 0.012232           | 0.000107      | 0.000248           | 0.000004      | 0.282379           | 0.000016      | 4.58          | 0.56          | 1.21      | 1.45      |           |
|                   |           | TD2-3    | 844  |               | 0.016977           | 0.000143      | 0.000344           | 0.000004      | 0.282358           | 0.000018      | 3.82          | 0.63          | 1.24      | 1.50      |           |
|                   |           | TD2-4    | 857  |               | 0.013080           | 0.000155      | 0.000264           | 0.000001      | 0.282372           | 0.000016      | 4.64          | 0.57          | 1.22      | 1.46      |           |
|                   |           | TD2-5    | 865  |               | 0.017816           | 0.000923      | 0.000347           | 0.000012      | 0.282354           | 0.000016      | 4.15          | 0.55          | 1.25      | 1.50      |           |
|                   |           | TD2-6    | 858  |               | 0.014857           | 0.000121      | 0.000308           | 0.000005      | 0.282391           | 0.000017      | 5.33          | 0.60          | 1.19      | 1.41      |           |
|                   |           | TD2-7    | 893  |               | 0.014508           | 0.000237      | 0.000306           | 0.000008      | 0.282402           | 0.000017      | 6.49          | 0.59          | 1.18      | 1.37      |           |
|                   |           | TD2-8    | 866  |               | 0.042733           | 0.001028      | 0.000855           | 0.000026      | 0.282383           | 0.000017      | 4.88          | 0.59          | 1.22      | 1.45      |           |
|                   |           | TD2-9    | 863  |               | 0.015189           | 0.000053      | 0.000309           | 0.000003      | 0.282399           | 0.000016      | 5.72          | 0.56          | 1.18      | 1.39      |           |
|                   |           | TD2-10   | 831  |               | 0.017203           | 0.000472      | 0.000344           | 0.000004      | 0.282369           | 0.000017      | 3.92          | 0.60          | 1.23      | 1.48      |           |

**Table S4: The isotope results for the Neoproterozoic mafic and adakitic pluton in the western margin of the Yangtze Block**

| Locality | Rock type | Spot    | Best |                    | Isotopic ratio     |               |                    |               |                   |               | $\epsilon$ Hf | $\pm 1\sigma$ | $T_{DM1}$ | $T_{DM2}$ | Refere<br>nce |
|----------|-----------|---------|------|--------------------|--------------------|---------------|--------------------|---------------|-------------------|---------------|---------------|---------------|-----------|-----------|---------------|
|          |           |         | age  | $^{176}\text{Yb/}$ | $^{176}\text{Lu/}$ |               | $^{176}\text{Hf/}$ |               |                   |               |               |               |           |           |               |
|          |           |         |      |                    | $^{177}\text{Hf}$  | $\pm 1\sigma$ | $^{177}\text{Hf}$  | $\pm 1\sigma$ | $^{177}\text{Hf}$ | $\pm 1\sigma$ |               |               |           |           |               |
|          |           |         | (Ma) | $\pm 1\sigma$      |                    |               |                    |               |                   |               |               |               | (Ma)      | (Ma)      |               |
|          |           | TD2-11  | 883  |                    | 0.022850           | 0.000181      | 0.000447           | 0.000007      | 0.282415          | 0.000015      | 6.63          | 0.54          | 1.17      | 1.35      |               |
|          |           | TD2-12  | 850  |                    | 0.031072           | 0.000511      | 0.000622           | 0.000005      | 0.282404          | 0.000017      | 5.44          | 0.61          | 1.19      | 1.40      |               |
|          |           | TD2-13  | 845  |                    | 0.011673           | 0.000406      | 0.000237           | 0.000005      | 0.282381          | 0.000015      | 4.73          | 0.54          | 1.21      | 1.44      |               |
|          |           | TD2-14  | 838  |                    | 0.008490           | 0.000186      | 0.000179           | 0.000001      | 0.282394          | 0.000014      | 5.08          | 0.48          | 1.19      | 1.42      |               |
|          |           | TD2-15  | 842  |                    | 0.020354           | 0.000409      | 0.000414           | 0.000012      | 0.282396          | 0.000018      | 5.09          | 0.65          | 1.19      | 1.42      |               |
|          |           | TD2-16  | 859  |                    | 0.017762           | 0.000288      | 0.000371           | 0.000007      | 0.282420          | 0.000018      | 6.33          | 0.63          | 1.16      | 1.35      |               |
|          |           | TD2-17  | 849  |                    | 0.011777           | 0.000205      | 0.000247           | 0.000002      | 0.282422          | 0.000016      | 6.25          | 0.54          | 1.15      | 1.35      |               |
|          |           | TD2-18  | 855  |                    | 0.022374           | 0.000198      | 0.000440           | 0.000001      | 0.282437          | 0.000017      | 6.80          | 0.60          | 1.14      | 1.32      |               |
|          |           | TD2-19  | 874  |                    | 0.040305           | 0.001527      | 0.000836           | 0.000037      | 0.282425          | 0.000018      | 6.57          | 0.61          | 1.16      | 1.35      |               |
|          |           | TD2-20  | 894  |                    | 0.015198           | 0.000240      | 0.000310           | 0.000007      | 0.282429          | 0.000015      | 7.45          | 0.52          | 1.14      | 1.31      |               |
|          |           | TD2-21  | 858  |                    | 0.012496           | 0.000082      | 0.000249           | 0.000003      | 0.282401          | 0.000016      | 5.72          | 0.56          | 1.18      | 1.39      |               |
|          |           | TD2-22  | 868  |                    | 0.009085           | 0.000249      | 0.000191           | 0.000005      | 0.282424          | 0.000018      | 6.79          | 0.62          | 1.15      | 1.33      |               |
|          |           | TD2-23  | 867  |                    | 0.020876           | 0.000090      | 0.000418           | 0.000005      | 0.282390          | 0.000015      | 5.43          | 0.53          | 1.20      | 1.42      |               |
|          |           | TD2-24  | 845  |                    | 0.013801           | 0.000697      | 0.000280           | 0.000011      | 0.282387          | 0.000017      | 4.91          | 0.59          | 1.20      | 1.43      |               |
|          |           | TD2-25  | 847  |                    | 0.018680           | 0.000633      | 0.000378           | 0.000007      | 0.282388          | 0.000019      | 4.91          | 0.66          | 1.20      | 1.43      |               |
|          |           | TD2-26  | 841  |                    | 0.010180           | 0.000116      | 0.000218           | 0.000002      | 0.282421          | 0.000014      | 6.04          | 0.50          | 1.15      | 1.36      |               |
|          |           | TD19-1  | 853  |                    | 0.017559           | 0.000126      | 0.000352           | 0.000004      | 0.282454          | 0.000014      | 7.44          | 0.48          | 1.11      | 1.28      |               |
|          |           | TD19-2  | 843  |                    | 0.009781           | 0.000101      | 0.000210           | 0.000001      | 0.282411          | 0.000015      | 5.77          | 0.53          | 1.16      | 1.38      |               |
|          |           | TD19-3  | 831  |                    | 0.013327           | 0.000351      | 0.000268           | 0.000005      | 0.282401          | 0.000012      | 5.09          | 0.43          | 1.18      | 1.41      |               |
|          |           | TD19-4  | 836  |                    | 0.010108           | 0.000071      | 0.000211           | 0.000001      | 0.282408          | 0.000015      | 5.47          | 0.51          | 1.17      | 1.39      |               |
|          |           | TD19-5  | 850  |                    | 0.022710           | 0.000525      | 0.000452           | 0.000004      | 0.282399          | 0.000013      | 5.34          | 0.47          | 1.19      | 1.41      |               |
|          |           | TD19-6  | 856  |                    | 0.030301           | 0.001048      | 0.000586           | 0.000013      | 0.282420          | 0.000016      | 6.14          | 0.57          | 1.16      | 1.36      |               |
|          |           | TD19-7  | 899  |                    | 0.013260           | 0.000087      | 0.000272           | 0.000003      | 0.282423          | 0.000013      | 7.40          | 0.47          | 1.15      | 1.31      |               |
|          |           | TD19-8  | 816  |                    | 0.019241           | 0.001223      | 0.000407           | 0.000030      | 0.282447          | 0.000016      | 6.32          | 0.57          | 1.12      | 1.32      |               |
|          |           | TD19-9  | 855  |                    | 0.027200           | 0.001711      | 0.000540           | 0.000028      | 0.282415          | 0.000015      | 5.96          | 0.52          | 1.17      | 1.37      |               |
|          |           | TD19-10 | 806  |                    | 0.016137           | 0.000111      | 0.000334           | 0.000001      | 0.282438          | 0.000014      | 5.81          | 0.51          | 1.13      | 1.34      |               |
|          |           | TD19-11 | 814  |                    | 0.023319           | 0.001288      | 0.000457           | 0.000015      | 0.282398          | 0.000021      | 4.51          | 0.74          | 1.19      | 1.43      |               |
|          |           | TD19-12 | 874  |                    | 0.025630           | 0.001663      | 0.000644           | 0.000047      | 0.282492          | 0.000022      | 9.04          | 0.78          | 1.06      | 1.19      |               |
|          |           | TD19-13 | 956  |                    | 0.022651           | 0.000250      | 0.000479           | 0.000002      | 0.282387          | 0.000013      | 7.23          | 0.45          | 1.21      | 1.37      |               |

**Table S4: The isotope results for the Neoproterozoic mafic and adakitic pluton in the western margin of the Yangtze Block**

| Locality             | Rock type | Spot    | Best |               | Isotopic ratio     |               |                    |               |                    |               | $\epsilon$ Hf | $\pm 1\sigma$ | $T_{DM1}$ | $T_{DM2}$ | Reference |
|----------------------|-----------|---------|------|---------------|--------------------|---------------|--------------------|---------------|--------------------|---------------|---------------|---------------|-----------|-----------|-----------|
|                      |           |         | age  |               | $^{176}\text{Yb}/$ |               | $^{176}\text{Lu}/$ |               | $^{176}\text{Hf}/$ |               |               |               |           |           |           |
|                      |           |         | (Ma) | $\pm 1\sigma$ | $^{177}\text{Hf}$  | $\pm 1\sigma$ | $^{177}\text{Hf}$  | $\pm 1\sigma$ | $^{177}\text{Hf}$  | $\pm 1\sigma$ |               |               |           |           |           |
| Gaojiacun intrusions |           | TD19-14 | 878  |               | 0.022156           | 0.000346      | 0.000424           | 0.000003      | 0.282390           | 0.000015      | 5.66          | 0.54          | 1.20      | 1.41      |           |
|                      |           | TD19-15 | 885  |               | 0.014426           | 0.000283      | 0.000305           | 0.000008      | 0.282388           | 0.000014      | 5.80          | 0.51          | 1.20      | 1.41      |           |
|                      |           | TD19-16 | 855  |               | 0.016975           | 0.000253      | 0.000349           | 0.000007      | 0.282428           | 0.000017      | 6.55          | 0.61          | 1.14      | 1.34      |           |
|                      |           | TD19-17 | 826  |               | 0.011408           | 0.000180      | 0.000232           | 0.000002      | 0.282393           | 0.000016      | 4.72          | 0.55          | 1.19      | 1.43      |           |
|                      |           | TD19-18 | 849  |               | 0.018551           | 0.000388      | 0.000372           | 0.000010      | 0.282411           | 0.000013      | 5.77          | 0.46          | 1.17      | 1.38      |           |
|                      |           | TD19-19 | 1047 |               | 0.016835           | 0.000547      | 0.000338           | 0.000009      | 0.282443           | 0.000018      | 11.33         | 0.64          | 1.12      | 1.18      |           |
|                      |           | TD19-20 | 820  |               | 0.012306           | 0.000073      | 0.000263           | 0.000003      | 0.282377           | 0.000015      | 4.01          | 0.53          | 1.21      | 1.47      |           |
|                      |           | TD19-21 | 841  |               | 0.043283           | 0.000606      | 0.000932           | 0.000019      | 0.282424           | 0.000016      | 5.78          | 0.57          | 1.17      | 1.37      |           |
|                      |           | TD19-22 | 854  |               | 0.034079           | 0.000376      | 0.000747           | 0.000004      | 0.282411           | 0.000016      | 5.68          | 0.57          | 1.18      | 1.39      |           |
|                      |           | TD19-23 | 871  |               | 0.014670           | 0.000224      | 0.000296           | 0.000002      | 0.282455           | 0.000016      | 7.89          | 0.56          | 1.11      | 1.26      |           |
|                      |           | TD19-24 | 883  |               | 0.009430           | 0.000161      | 0.000215           | 0.000002      | 0.282468           | 0.000015      | 8.66          | 0.53          | 1.09      | 1.22      |           |
|                      |           | TD19-25 | 876  |               | 0.035471           | 0.000492      | 0.000711           | 0.000003      | 0.282460           | 0.000015      | 7.93          | 0.54          | 1.11      | 1.26      |           |
|                      |           | TD19-26 | 860  |               | 0.019788           | 0.000358      | 0.000390           | 0.000002      | 0.282442           | 0.000016      | 7.10          | 0.56          | 1.13      | 1.30      |           |
|                      |           | TD19-27 | 867  |               | 0.016797           | 0.000308      | 0.000363           | 0.000005      | 0.282386           | 0.000017      | 5.33          | 0.61          | 1.20      | 1.42      |           |
|                      |           | TD19-28 | 978  |               | 0.011765           | 0.000283      | 0.000243           | 0.000003      | 0.282418           | 0.000017      | 8.96          | 0.58          | 1.16      | 1.28      |           |
|                      |           | TD19-29 | 851  |               | 0.024147           | 0.000068      | 0.000519           | 0.000004      | 0.282403           | 0.000016      | 5.49          | 0.56          | 1.18      | 1.40      |           |
|                      |           | TD19-30 | 868  |               | 0.022693           | 0.000504      | 0.000459           | 0.000004      | 0.282410           | 0.000019      | 6.11          | 0.65          | 1.17      | 1.37      |           |
|                      |           | TD19-31 | 870  |               | 0.006985           | 0.000088      | 0.000155           | 0.000001      | 0.282411           | 0.000016      | 6.37          | 0.54          | 1.16      | 1.36      |           |
|                      |           | TD19-32 | 841  |               | 0.018460           | 0.000367      | 0.000369           | 0.000007      | 0.282456           | 0.000017      | 7.22          | 0.58          | 1.11      | 1.28      |           |
|                      |           | GJC2-1  | 847  |               | 0.080279           | 0.003277      | 0.001960           | 0.000090      | 0.282542           | 0.000022      | 9.49          | 0.78          | 1.03      | 1.14      |           |
|                      |           | GJC2-2  | 868  |               | 0.133812           | 0.004052      | 0.003106           | 0.000071      | 0.282535           | 0.000020      | 9.02          | 0.69          | 1.07      | 1.19      |           |
|                      |           | GJC2-3  | 859  |               | 0.162678           | 0.001295      | 0.004165           | 0.000054      | 0.282562           | 0.000023      | 9.20          | 0.80          | 1.07      | 1.17      |           |
|                      |           | GJC2-4  | 857  |               | 0.164292           | 0.003965      | 0.003721           | 0.000092      | 0.282534           | 0.000015      | 8.41          | 0.53          | 1.09      | 1.22      |           |
|                      |           | GJC2-5  | 877  |               | 0.052907           | 0.002224      | 0.001351           | 0.000053      | 0.282519           | 0.000018      | 9.68          | 0.62          | 1.05      | 1.15      |           |
|                      |           | GJC2-6  | 903  |               | 0.071861           | 0.000553      | 0.001876           | 0.000027      | 0.282513           | 0.000020      | 9.70          | 0.70          | 1.07      | 1.17      |           |
|                      |           | GJC2-7  | 884  |               | 0.186431           | 0.002406      | 0.004208           | 0.000040      | 0.282552           | 0.000026      | 9.29          | 0.92          | 1.08      | 1.18      |           |
|                      |           | GJC2-8  | 840  |               | 0.083761           | 0.001223      | 0.002032           | 0.000054      | 0.282550           | 0.000018      | 9.59          | 0.62          | 1.02      | 1.13      |           |
|                      |           | GJC2-9  | 851  |               | 0.043928           | 0.002456      | 0.001002           | 0.000063      | 0.282547           | 0.000018      | 10.30         | 0.63          | 1.00      | 1.09      |           |
|                      |           | GJC2-10 | 848  |               | 0.085536           | 0.001170      | 0.002021           | 0.000011      | 0.282602           | 0.000017      | 11.59         | 0.60          | 0.95      | 1.01      |           |

**Table S4: The isotope results for the Neoproterozoic mafic and adakitic pluton in the western margin of the Yangtze Block**

| Locality | Rock type | Spot    | Best |     | Isotopic ratio     |          |                    |          |                    |          | εHf   | ±1σ  | T <sub>DM1</sub> | T <sub>DM2</sub> | Reference |
|----------|-----------|---------|------|-----|--------------------|----------|--------------------|----------|--------------------|----------|-------|------|------------------|------------------|-----------|
|          |           |         | age  |     | <sup>176</sup> Yb/ |          | <sup>176</sup> Lu/ |          | <sup>176</sup> Hf/ |          |       |      |                  |                  |           |
|          |           |         |      |     | <sup>177</sup> Hf  | ±1σ      | <sup>177</sup> Hf  | ±1σ      | <sup>177</sup> Hf  | ±1σ      |       |      |                  |                  |           |
|          |           |         | (Ma) | ±1σ |                    |          |                    |          |                    |          |       |      |                  |                  |           |
|          |           | GJC2-11 | 860  |     | 0.122398           | 0.001147 | 0.002993           | 0.000009 | 0.282533           | 0.000016 | 8.86  | 0.57 | 1.07             | 1.19             |           |
|          |           | GJC2-12 | 856  |     | 0.118926           | 0.001123 | 0.002796           | 0.000024 | 0.282461           | 0.000020 | 6.31  | 0.71 | 1.17             | 1.35             |           |
|          |           | GJC2-13 | 846  |     | 0.106300           | 0.005956 | 0.002659           | 0.000137 | 0.282489           | 0.000015 | 7.19  | 0.52 | 1.13             | 1.29             |           |
|          |           | GJC2-14 | 847  |     | 0.116289           | 0.000857 | 0.002674           | 0.000011 | 0.282544           | 0.000018 | 9.17  | 0.63 | 1.05             | 1.16             |           |
|          |           | GJC2-15 | 858  |     | 0.078927           | 0.004368 | 0.001820           | 0.000071 | 0.282522           | 0.000015 | 9.11  | 0.53 | 1.06             | 1.17             |           |
|          |           | GJC2-16 | 849  |     | 0.114967           | 0.002613 | 0.002891           | 0.000075 | 0.282558           | 0.000022 | 9.58  | 0.76 | 1.03             | 1.14             |           |
|          |           | GJC2-17 | 857  |     | 0.111462           | 0.001682 | 0.002790           | 0.000055 | 0.282535           | 0.000021 | 8.98  | 0.75 | 1.07             | 1.18             |           |
|          |           | GJC2-18 | 852  |     | 0.132369           | 0.005330 | 0.002913           | 0.000099 | 0.282466           | 0.000017 | 6.37  | 0.60 | 1.17             | 1.34             |           |
|          |           | GJC2-19 | 825  |     | 0.095971           | 0.001012 | 0.002362           | 0.000035 | 0.282520           | 0.000021 | 8.04  | 0.75 | 1.07             | 1.22             |           |
|          |           | GJC2-20 | 847  |     | 0.125383           | 0.008620 | 0.002975           | 0.000225 | 0.282580           | 0.000020 | 10.28 | 0.72 | 1.00             | 1.09             |           |
|          |           | GJC2-21 | 852  |     | 0.254177           | 0.002877 | 0.005563           | 0.000037 | 0.282642           | 0.000025 | 11.10 | 0.88 | 0.98             | 1.04             |           |
|          |           | GJC2-22 | 842  |     | 0.099094           | 0.001982 | 0.002418           | 0.000062 | 0.282472           | 0.000021 | 6.63  | 0.75 | 1.15             | 1.32             |           |
|          |           | GJC2-23 | 862  |     | 0.134496           | 0.000894 | 0.003067           | 0.000030 | 0.282545           | 0.000019 | 9.28  | 0.66 | 1.06             | 1.16             |           |
|          |           | GJC2-24 | 856  |     | 0.210450           | 0.009664 | 0.004888           | 0.000259 | 0.282629           | 0.000024 | 11.07 | 0.85 | 0.98             | 1.04             |           |
|          |           | GJC4-1  | 900  |     | 0.053044           | 0.000859 | 0.001031           | 0.000009 | 0.282470           | 0.000017 | 8.63  | 0.58 | 1.11             | 1.24             |           |
|          |           | GJC4-2  | 849  |     | 0.043065           | 0.000326 | 0.000860           | 0.000016 | 0.282489           | 0.000016 | 8.27  | 0.56 | 1.08             | 1.22             |           |
|          |           | GJC4-3  | 835  |     | 0.042771           | 0.001676 | 0.000810           | 0.000037 | 0.282438           | 0.000015 | 6.18  | 0.53 | 1.15             | 1.34             |           |
|          |           | GJC4-4  | 871  |     | 0.018285           | 0.000586 | 0.000353           | 0.000004 | 0.282430           | 0.000016 | 6.98  | 0.57 | 1.14             | 1.32             |           |
|          |           | GJC4-5  | 848  |     | 0.017021           | 0.000311 | 0.000360           | 0.000001 | 0.282350           | 0.000024 | 3.63  | 0.84 | 1.25             | 1.52             |           |
|          |           | GJC4-6  | 853  |     | 0.028061           | 0.000906 | 0.000585           | 0.000012 | 0.282536           | 0.000031 | 10.20 | 1.10 | 1.00             | 1.10             |           |
|          |           | GJC4-7  | 838  |     | 0.014947           | 0.000106 | 0.000372           | 0.000014 | 0.282208           | 0.000035 | -1.66 | 1.22 | 1.45             | 1.84             |           |
|          |           | GJC4-8  | 839  |     | 0.038755           | 0.001579 | 0.000750           | 0.000017 | 0.282318           | 0.000051 | 2.07  | 1.79 | 1.31             | 1.61             |           |
|          |           | GJC4-9  | 828  |     | 0.033065           | 0.000639 | 0.000612           | 0.000001 | 0.282401           | 0.000013 | 4.82  | 0.45 | 1.19             | 1.42             |           |
|          |           | GJC4-10 | 846  |     | 0.017940           | 0.000329 | 0.000351           | 0.000001 | 0.282470           | 0.000014 | 7.85  | 0.51 | 1.09             | 1.24             |           |
|          |           | GJC4-11 | 859  |     | 0.027736           | 0.001715 | 0.000547           | 0.000025 | 0.282445           | 0.000012 | 7.11  | 0.41 | 1.13             | 1.30             |           |
|          |           | GJC4-12 | 850  |     | 0.025912           | 0.000490 | 0.000509           | 0.000005 | 0.282431           | 0.000013 | 6.46  | 0.45 | 1.14             | 1.34             |           |
|          |           | GJC4-13 | 853  |     | 0.042485           | 0.000319 | 0.000809           | 0.000006 | 0.282455           | 0.000014 | 7.17  | 0.49 | 1.12             | 1.29             |           |
|          |           | GJC4-14 | 855  |     | 0.049348           | 0.001271 | 0.001002           | 0.000007 | 0.282433           | 0.000015 | 6.36  | 0.53 | 1.16             | 1.35             |           |
|          |           | GJC4-15 | 833  |     | 0.052706           | 0.001528 | 0.000982           | 0.000018 | 0.282468           | 0.000013 | 7.12  | 0.46 | 1.11             | 1.28             |           |

**Table S4: The isotope results for the Neoproterozoic mafic and adakitic pluton in the western margin of the Yangtze Block**

| Locality                | Rock type | Spot     | Best |               | Isotopic ratio     |               |                    |               |                    |               | $\epsilon$ Hf | $\pm 1\sigma$ | $T_{DM1}$ | $T_{DM2}$ | Reference |
|-------------------------|-----------|----------|------|---------------|--------------------|---------------|--------------------|---------------|--------------------|---------------|---------------|---------------|-----------|-----------|-----------|
|                         |           |          | age  |               | $^{176}\text{Yb}/$ |               | $^{176}\text{Lu}/$ |               | $^{176}\text{Hf}/$ |               |               |               |           |           |           |
|                         |           |          | (Ma) | $\pm 1\sigma$ | $^{177}\text{Hf}$  | $\pm 1\sigma$ | $^{177}\text{Hf}$  | $\pm 1\sigma$ | $^{177}\text{Hf}$  | $\pm 1\sigma$ |               |               |           |           |           |
| Lengshuiqing intrusions |           | GJC4-16  | 830  |               | 0.032118           | 0.000576      | 0.000609           | 0.000003      | 0.282431           | 0.000014      | 5.96          | 0.49          | 1.15      | 1.35      |           |
|                         |           | GJC4-17  | 1702 |               | 0.017282           | 0.000545      | 0.000351           | 0.000006      | 0.282439           | 0.000012      | 25.84         | 0.43          | 1.13      | 0.74      |           |
|                         |           | GJC4-18  | 838  |               | 0.018394           | 0.000283      | 0.000387           | 0.000006      | 0.282426           | 0.000012      | 6.08          | 0.44          | 1.15      | 1.35      |           |
|                         |           | GJC4-19  | 844  |               | 0.045238           | 0.000312      | 0.000888           | 0.000006      | 0.282424           | 0.000014      | 5.84          | 0.49          | 1.17      | 1.37      |           |
|                         |           | GJC4-20  | 877  |               | 0.060771           | 0.001776      | 0.001093           | 0.000031      | 0.282467           | 0.000013      | 7.97          | 0.45          | 1.11      | 1.26      |           |
|                         |           | GJC4-21  | 822  |               | 0.021596           | 0.000647      | 0.000526           | 0.000028      | 0.282480           | 0.000017      | 7.56          | 0.60          | 1.08      | 1.24      |           |
|                         |           | GJC4-22  | 815  |               | 0.070740           | 0.002536      | 0.001413           | 0.000033      | 0.282436           | 0.000015      | 5.36          | 0.52          | 1.17      | 1.38      |           |
|                         |           | GJC4-23  | 907  |               | 0.099537           | 0.002482      | 0.002558           | 0.000060      | 0.282492           | 0.000027      | 8.63          | 0.96          | 1.12      | 1.24      |           |
|                         |           | GJC4-24  | 845  |               | 0.021409           | 0.000864      | 0.000444           | 0.000020      | 0.282442           | 0.000015      | 6.78          | 0.51          | 1.13      | 1.31      |           |
|                         |           | GJC4-25  | 883  |               | 0.049373           | 0.000444      | 0.000954           | 0.000004      | 0.282466           | 0.000013      | 8.16          | 0.46          | 1.11      | 1.25      |           |
|                         |           | GJC4-26  | 838  |               | 0.032341           | 0.000325      | 0.000666           | 0.000009      | 0.282449           | 0.000012      | 6.73          | 0.42          | 1.13      | 1.31      |           |
|                         |           | GJC4-27  | 958  |               | 0.023642           | 0.001415      | 0.000460           | 0.000019      | 0.282459           | 0.000013      | 9.82          | 0.47          | 1.11      | 1.20      |           |
|                         |           | GJC4-28  | 853  |               | 0.021509           | 0.000716      | 0.000517           | 0.000030      | 0.282427           | 0.000016      | 6.37          | 0.55          | 1.15      | 1.34      |           |
|                         |           | LSQ23-1  | 819  |               | 0.012654           | 0.000142      | 0.000271           | 0.000006      | 0.282442           | 0.000013      | 6.30          | 0.44          | 1.12      | 1.32      |           |
|                         |           | LSQ23-2  | 813  |               | 0.017866           | 0.000164      | 0.000401           | 0.000008      | 0.282456           | 0.000016      | 6.56          | 0.54          | 1.11      | 1.30      |           |
|                         |           | LSQ23-3  | 835  |               | 0.043537           | 0.000147      | 0.000871           | 0.000009      | 0.282472           | 0.000015      | 7.38          | 0.53          | 1.10      | 1.27      |           |
|                         |           | LSQ23-4  | 857  |               | 0.013693           | 0.000201      | 0.000293           | 0.000001      | 0.282399           | 0.000015      | 5.61          | 0.51          | 1.18      | 1.40      |           |
|                         |           | LSQ23-5  | 812  |               | 0.028642           | 0.000322      | 0.000577           | 0.000002      | 0.282477           | 0.000015      | 7.23          | 0.52          | 1.08      | 1.26      |           |
|                         |           | LSQ23-6  | 807  |               | 0.017073           | 0.000131      | 0.000381           | 0.000002      | 0.282434           | 0.000014      | 5.68          | 0.50          | 1.14      | 1.35      |           |
|                         |           | LSQ23-7  | 839  |               | 0.035031           | 0.000641      | 0.000717           | 0.000002      | 0.282496           | 0.000014      | 8.40          | 0.50          | 1.06      | 1.20      |           |
|                         |           | LSQ23-8  | 812  |               | 0.043237           | 0.000549      | 0.000922           | 0.000003      | 0.282462           | 0.000014      | 6.51          | 0.48          | 1.11      | 1.30      |           |
|                         |           | LSQ23-9  | 844  |               | 0.021420           | 0.000132      | 0.000465           | 0.000009      | 0.282455           | 0.000016      | 7.19          | 0.57          | 1.11      | 1.28      |           |
|                         |           | LSQ23-10 | 819  |               | 0.033756           | 0.000322      | 0.000676           | 0.000003      | 0.282517           | 0.000018      | 8.72          | 0.62          | 1.03      | 1.17      |           |
|                         |           | LSQ23-11 | 847  |               | 0.042707           | 0.000780      | 0.000983           | 0.000027      | 0.282476           | 0.000013      | 7.70          | 0.45          | 1.10      | 1.25      |           |
|                         |           | LSQ23-12 | 854  |               | 0.061638           | 0.000511      | 0.001315           | 0.000009      | 0.282477           | 0.000018      | 7.70          | 0.63          | 1.11      | 1.26      |           |
|                         |           | LSQ23-13 | 831  |               | 0.016142           | 0.000234      | 0.000397           | 0.000002      | 0.282421           | 0.000016      | 5.73          | 0.55          | 1.16      | 1.37      |           |
|                         |           | LSQ23-14 | 846  |               | 0.053326           | 0.000722      | 0.001098           | 0.000015      | 0.282480           | 0.000015      | 7.77          | 0.51          | 1.09      | 1.25      |           |
|                         |           | LSQ23-15 | 851  |               | 0.053881           | 0.001005      | 0.001120           | 0.000009      | 0.282496           | 0.000014      | 8.40          | 0.47          | 1.07      | 1.21      |           |
|                         |           | LSQ23-16 | 847  |               | 0.019393           | 0.000794      | 0.000406           | 0.000011      | 0.282435           | 0.000015      | 6.58          | 0.52          | 1.14      | 1.33      |           |

**Table S4: The isotope results for the Neoproterozoic mafic and adakitic pluton in the western margin of the Yangtze Block**

| Locality           | Rock type | Spot     | Best |               | Isotopic ratio     |               |                    |               |                    |               | $\epsilon$ Hf | $\pm 1\sigma$ | $T_{DM1}$ | $T_{DM2}$ | Reference |
|--------------------|-----------|----------|------|---------------|--------------------|---------------|--------------------|---------------|--------------------|---------------|---------------|---------------|-----------|-----------|-----------|
|                    |           |          | age  |               | $^{176}\text{Yb}/$ |               | $^{176}\text{Lu}/$ |               | $^{176}\text{Hf}/$ |               |               |               |           |           |           |
|                    |           |          | (Ma) | $\pm 1\sigma$ | $^{177}\text{Hf}$  | $\pm 1\sigma$ | $^{177}\text{Hf}$  | $\pm 1\sigma$ | $^{177}\text{Hf}$  | $\pm 1\sigma$ |               |               |           |           |           |
| Dadukou intrusions |           | LSQ23-17 | 934  |               | 0.025915           | 0.000466      | 0.000518           | 0.000003      | 0.282403           | 0.000016      | 7.32          | 0.56          | 1.18      | 1.35      |           |
|                    |           | LSQ23-18 | 860  |               | 0.022544           | 0.000200      | 0.000507           | 0.000004      | 0.282469           | 0.000015      | 8.00          | 0.54          | 1.09      | 1.24      |           |
|                    |           | LSQ23-19 | 841  |               | 0.033354           | 0.000417      | 0.000750           | 0.000014      | 0.282432           | 0.000017      | 6.14          | 0.60          | 1.15      | 1.35      |           |
|                    |           | LSQ23-20 | 823  |               | 0.032503           | 0.000467      | 0.000711           | 0.000002      | 0.282406           | 0.000016      | 4.87          | 0.54          | 1.19      | 1.42      |           |
|                    |           | LSQ23-21 | 853  |               | 0.023451           | 0.000439      | 0.000475           | 0.000003      | 0.282407           | 0.000014      | 5.68          | 0.50          | 1.18      | 1.39      |           |
|                    |           | LSQ23-22 | 835  |               | 0.049198           | 0.000731      | 0.001033           | 0.000018      | 0.282168           | 0.000016      | -3.48         | 0.57          | 1.53      | 1.96      |           |
|                    |           | LSQ23-23 | 826  |               | 0.012800           | 0.000492      | 0.000292           | 0.000007      | 0.282429           | 0.000017      | 5.98          | 0.59          | 1.14      | 1.35      |           |
|                    |           | LSQ23-24 | 853  |               | 0.060953           | 0.000773      | 0.001429           | 0.000009      | 0.282483           | 0.000017      | 7.86          | 0.61          | 1.10      | 1.25      |           |
|                    |           | LSQ23-25 | 890  |               | 0.020398           | 0.000179      | 0.000426           | 0.000005      | 0.282432           | 0.000016      | 7.40          | 0.56          | 1.14      | 1.31      |           |
|                    |           | LSQ23-26 | 844  |               | 0.016139           | 0.000064      | 0.000364           | 0.000006      | 0.282399           | 0.000017      | 5.25          | 0.60          | 1.19      | 1.41      |           |
|                    |           | LSQ23-27 | 864  |               | 0.021389           | 0.000608      | 0.000462           | 0.000007      | 0.282418           | 0.000018      | 6.34          | 0.63          | 1.16      | 1.36      |           |
|                    |           | LSQ23-28 | 838  |               | 0.039269           | 0.001937      | 0.000746           | 0.000027      | 0.282167           | 0.000015      | -3.31         | 0.52          | 1.52      | 1.95      |           |
|                    |           | LSQ23-29 | 824  |               | 0.028623           | 0.000491      | 0.000654           | 0.000002      | 0.282434           | 0.000017      | 5.89          | 0.59          | 1.15      | 1.35      |           |
|                    |           | LSQ23-30 | 845  |               | 0.067229           | 0.000666      | 0.001374           | 0.000007      | 0.282462           | 0.000016      | 6.96          | 0.56          | 1.13      | 1.30      |           |
|                    |           | LSQ23-31 | 832  |               | 0.057673           | 0.001140      | 0.001524           | 0.000062      | 0.282430           | 0.000018      | 5.44          | 0.64          | 1.18      | 1.39      |           |
|                    |           | LSQ23-32 | 892  |               | 0.028362           | 0.001051      | 0.000652           | 0.000014      | 0.282457           | 0.000020      | 8.22          | 0.70          | 1.11      | 1.26      |           |
|                    |           | DDK26-1  | 800  |               | 0.038321           | 0.000698      | 0.000739           | 0.000024      | 0.282475           | 0.000016      | 6.77          | 0.55          | 1.09      | 1.28      |           |
|                    |           | DDK26-2  | 811  |               | 0.060996           | 0.000899      | 0.001192           | 0.000032      | 0.282488           | 0.000012      | 7.23          | 0.42          | 1.09      | 1.26      |           |
|                    |           | DDK26-3  | 822  |               | 0.065712           | 0.001912      | 0.001244           | 0.000018      | 0.282424           | 0.000013      | 5.17          | 0.47          | 1.18      | 1.40      |           |
|                    |           | DDK26-4  | 827  |               | 0.092001           | 0.000528      | 0.001781           | 0.000010      | 0.282506           | 0.000014      | 7.91          | 0.48          | 1.08      | 1.23      |           |
|                    |           | DDK26-5  | 799  |               | 0.075266           | 0.001890      | 0.001401           | 0.000053      | 0.282486           | 0.000013      | 6.80          | 0.46          | 1.10      | 1.28      |           |
|                    |           | DDK26-6  | 812  |               | 0.166118           | 0.001917      | 0.003089           | 0.000064      | 0.282568           | 0.000018      | 9.07          | 0.62          | 1.02      | 1.14      |           |
|                    |           | DDK26-7  | 811  |               | 0.058237           | 0.003625      | 0.001155           | 0.000082      | 0.282497           | 0.000017      | 7.58          | 0.60          | 1.07      | 1.23      |           |
|                    |           | DDK26-8  | 688  |               | 0.063943           | 0.001325      | 0.001197           | 0.000007      | 0.282480           | 0.000016      | 4.30          | 0.57          | 1.10      | 1.35      |           |
|                    |           | DDK26-9  | 811  |               | 0.061967           | 0.000760      | 0.001196           | 0.000005      | 0.282446           | 0.000014      | 5.74          | 0.49          | 1.15      | 1.35      |           |
|                    |           | DDK26-10 | 780  |               | 0.094754           | 0.000565      | 0.001804           | 0.000027      | 0.282510           | 0.000016      | 7.02          | 0.55          | 1.07      | 1.25      |           |
|                    |           | DDK26-11 | 811  |               | 0.039905           | 0.000313      | 0.000766           | 0.000016      | 0.282452           | 0.000014      | 6.18          | 0.49          | 1.12      | 1.32      |           |
|                    |           | DDK26-12 | 806  |               | 0.084251           | 0.002346      | 0.001515           | 0.000018      | 0.282455           | 0.000015      | 5.78          | 0.54          | 1.14      | 1.35      |           |
|                    |           | DDK26-13 | 805  |               | 0.042220           | 0.000423      | 0.000811           | 0.000014      | 0.282439           | 0.000014      | 5.56          | 0.48          | 1.14      | 1.36      |           |

**Table S4: The isotope results for the Neoproterozoic mafic and adakitic pluton in the western margin of the Yangtze Block**

| Locality | Rock type | Spot     | Best |                    | Isotopic ratio     |                    |                   |                    |                   |                   | $\epsilon$ Hf | $\pm 1\sigma$ | $T_{DM1}$ | $T_{DM2}$ | Reference |
|----------|-----------|----------|------|--------------------|--------------------|--------------------|-------------------|--------------------|-------------------|-------------------|---------------|---------------|-----------|-----------|-----------|
|          |           |          | age  | $^{176}\text{Yb}/$ | $^{176}\text{Lu}/$ | $^{176}\text{Hf}/$ |                   | $^{176}\text{Hf}/$ | $\pm 1\sigma$     |                   |               |               |           |           |           |
|          |           |          |      |                    |                    | $^{177}\text{Hf}$  | $\pm 1\sigma$     |                    |                   | $^{177}\text{Hf}$ |               |               |           |           |           |
|          |           |          | (Ma) | $\pm 1\sigma$      | $^{177}\text{Hf}$  | $\pm 1\sigma$      | $^{177}\text{Hf}$ | $\pm 1\sigma$      | $^{177}\text{Hf}$ | $\pm 1\sigma$     |               |               |           |           |           |
|          |           | DDK26-14 | 824  |                    | 0.076389           | 0.001227           | 0.001378          | 0.000004           | 0.282473          | 0.000014          | 6.90          | 0.50          | 1.11      | 1.29      |           |
|          |           | DDK26-15 | 807  |                    | 0.035745           | 0.000424           | 0.000705          | 0.000002           | 0.282475          | 0.000015          | 6.96          | 0.53          | 1.09      | 1.27      |           |
|          |           | DDK26-16 | 763  |                    | 0.082371           | 0.002138           | 0.001566          | 0.000059           | 0.282488          | 0.000016          | 6.02          | 0.55          | 1.10      | 1.30      |           |
|          |           | DDK26-17 | 810  |                    | 0.070728           | 0.001077           | 0.001372          | 0.000014           | 0.282458          | 0.000015          | 6.04          | 0.53          | 1.13      | 1.33      |           |
|          |           | DDK26-18 | 813  |                    | 0.081995           | 0.001113           | 0.001547          | 0.000005           | 0.282450          | 0.000015          | 5.76          | 0.51          | 1.15      | 1.35      |           |
|          |           | DDK26-19 | 808  |                    | 0.062658           | 0.001558           | 0.001241          | 0.000042           | 0.282444          | 0.000014          | 5.60          | 0.48          | 1.15      | 1.36      |           |
|          |           | DDK26-20 | 755  |                    | 0.069880           | 0.001684           | 0.001339          | 0.000014           | 0.282462          | 0.000014          | 5.05          | 0.50          | 1.13      | 1.35      |           |
|          |           | DDK26-21 | 811  |                    | 0.153811           | 0.000683           | 0.002890          | 0.000031           | 0.282542          | 0.000014          | 8.23          | 0.51          | 1.06      | 1.19      |           |
|          |           | DDK26-22 | 826  |                    | 0.077716           | 0.001271           | 0.001401          | 0.000003           | 0.282466          | 0.000012          | 6.66          | 0.43          | 1.12      | 1.30      |           |
|          |           | DDK26-23 | 835  |                    | 0.060261           | 0.002093           | 0.001167          | 0.000024           | 0.282493          | 0.000015          | 7.96          | 0.51          | 1.08      | 1.23      |           |
|          |           | DDK26-24 | 704  |                    | 0.046782           | 0.000915           | 0.000908          | 0.000008           | 0.282449          | 0.000014          | 3.68          | 0.50          | 1.13      | 1.40      |           |
|          |           | DDK46-1  | 833  |                    | 0.049918           | 0.001564           | 0.001085          | 0.000041           | 0.282464          | 0.000015          | 6.94          | 0.54          | 1.12      | 1.29      |           |
|          |           | DDK46-2  | 840  |                    | 0.153857           | 0.004843           | 0.003169          | 0.000082           | 0.282522          | 0.000017          | 7.94          | 0.60          | 1.10      | 1.23      |           |
|          |           | DDK46-3  | 837  |                    | 0.056471           | 0.000590           | 0.001243          | 0.000020           | 0.282489          | 0.000018          | 7.82          | 0.64          | 1.09      | 1.24      |           |
|          |           | DDK46-4  | 832  |                    | 0.058744           | 0.000761           | 0.001259          | 0.000023           | 0.282487          | 0.000014          | 7.63          | 0.48          | 1.09      | 1.25      |           |
|          |           | DDK46-5  | 833  |                    | 0.072747           | 0.000830           | 0.001882          | 0.000036           | 0.282446          | 0.000019          | 5.82          | 0.68          | 1.17      | 1.36      |           |
|          |           | DDK46-6  | 820  |                    | 0.026989           | 0.000606           | 0.000665          | 0.000021           | 0.282453          | 0.000020          | 6.48          | 0.72          | 1.12      | 1.31      |           |
|          |           | DDK46-7  | 837  |                    | 0.040892           | 0.000558           | 0.000938          | 0.000017           | 0.282434          | 0.000014          | 6.05          | 0.51          | 1.15      | 1.35      |           |
|          |           | DDK46-8  | 831  |                    | 0.055095           | 0.000406           | 0.001181          | 0.000003           | 0.282483          | 0.000016          | 7.51          | 0.56          | 1.09      | 1.25      |           |
|          |           | DDK46-9  | 826  |                    | 0.041114           | 0.001770           | 0.001019          | 0.000051           | 0.282425          | 0.000013          | 5.44          | 0.46          | 1.17      | 1.38      |           |
|          |           | DDK46-10 | 825  |                    | 0.172550           | 0.001909           | 0.003435          | 0.000031           | 0.282552          | 0.000018          | 8.57          | 0.63          | 1.06      | 1.18      |           |
|          |           | DDK46-11 | 782  |                    | 0.024443           | 0.000433           | 0.000554          | 0.000010           | 0.282457          | 0.000017          | 5.85          | 0.61          | 1.11      | 1.32      |           |
|          |           | DDK46-12 | 821  |                    | 0.185551           | 0.002877           | 0.003798          | 0.000022           | 0.282589          | 0.000020          | 9.60          | 0.69          | 1.01      | 1.11      |           |
|          |           | DDK46-13 | 814  |                    | 0.085083           | 0.002309           | 0.001899          | 0.000014           | 0.282443          | 0.000015          | 5.31          | 0.51          | 1.17      | 1.38      |           |
|          |           | DDK46-14 | 822  |                    | 0.067053           | 0.000945           | 0.001431          | 0.000030           | 0.282467          | 0.000015          | 6.61          | 0.54          | 1.12      | 1.31      |           |
|          |           | DDK46-15 | 811  |                    | 0.029847           | 0.000317           | 0.000693          | 0.000005           | 0.282432          | 0.000018          | 5.51          | 0.62          | 1.15      | 1.37      |           |
|          |           | DDK46-16 | 821  |                    | 0.071740           | 0.001814           | 0.001454          | 0.000020           | 0.282483          | 0.000018          | 7.13          | 0.64          | 1.10      | 1.27      |           |
|          |           | DDK46-17 | 811  |                    | 0.069578           | 0.000640           | 0.001559          | 0.000003           | 0.282422          | 0.000015          | 4.71          | 0.54          | 1.19      | 1.42      |           |
|          |           | DDK46-18 | 976  |                    | 0.123260           | 0.005704           | 0.003520          | 0.000169           | 0.282468          | 0.000039          | 8.59          | 1.37          | 1.19      | 1.30      |           |

**Table S4: The isotope results for the Neoproterozoic mafic and adakitic pluton in the western margin of the Yangtze Block**

| Locality         | Rock type | Spot     | Best |               | Isotopic ratio     |               |                    |               |                    |               | $\epsilon_{\text{Hf}}$ | $\pm 1\sigma$ | $T_{\text{DM1}}$ | $T_{\text{DM2}}$ | Reference |
|------------------|-----------|----------|------|---------------|--------------------|---------------|--------------------|---------------|--------------------|---------------|------------------------|---------------|------------------|------------------|-----------|
|                  |           |          | age  |               | $^{176}\text{Yb}/$ |               | $^{176}\text{Lu}/$ |               | $^{176}\text{Hf}/$ |               |                        |               |                  |                  |           |
|                  |           |          | (Ma) | $\pm 1\sigma$ | $^{177}\text{Hf}$  | $\pm 1\sigma$ | $^{177}\text{Hf}$  | $\pm 1\sigma$ | $^{177}\text{Hf}$  | $\pm 1\sigma$ |                        |               |                  |                  |           |
| Shaba intrusions |           | DDK46-19 | 807  |               | 0.045571           | 0.001360      | 0.001018           | 0.000008      | 0.282432           | 0.000018      | 5.26                   | 0.65          | 1.16             | 1.38             |           |
|                  |           | DDK46-20 | 827  |               | 0.145267           | 0.002372      | 0.002936           | 0.000065      | 0.282535           | 0.000018      | 8.30                   | 0.63          | 1.07             | 1.20             |           |
|                  |           | DDK46-21 | 807  |               | 0.071742           | 0.001273      | 0.001555           | 0.000040      | 0.282466           | 0.000018      | 6.20                   | 0.61          | 1.13             | 1.32             |           |
|                  |           | DDK46-22 | 828  |               | 0.037933           | 0.000915      | 0.000962           | 0.000015      | 0.282460           | 0.000019      | 6.74                   | 0.66          | 1.12             | 1.30             |           |
|                  |           | DDK46-23 | 816  |               | 0.059873           | 0.002198      | 0.001292           | 0.000054      | 0.282442           | 0.000015      | 5.68                   | 0.53          | 1.15             | 1.36             |           |
|                  |           | DDK46-24 | 821  |               | 0.062930           | 0.000721      | 0.001356           | 0.000004      | 0.282471           | 0.000012      | 6.75                   | 0.43          | 1.12             | 1.30             |           |
|                  |           | DDK46-25 | 822  |               | 0.029156           | 0.000178      | 0.000692           | 0.000003      | 0.282428           | 0.000016      | 5.63                   | 0.56          | 1.15             | 1.37             |           |
|                  |           | SB2-1    | 793  |               | 0.023084           | 0.000313      | 0.000459           | 0.000002      | 0.282495           | 0.000014      | 7.49                   | 0.49          | 1.06             | 1.23             |           |
|                  |           | SB2-2    | 784  |               | 0.024253           | 0.000469      | 0.000471           | 0.000005      | 0.282470           | 0.000016      | 6.39                   | 0.55          | 1.09             | 1.29             |           |
|                  |           | SB2-3    | 785  |               | 0.022243           | 0.000555      | 0.000430           | 0.000003      | 0.282467           | 0.000013      | 6.33                   | 0.47          | 1.09             | 1.29             |           |
|                  |           | SB2-4    | 800  |               | 0.037860           | 0.001079      | 0.000744           | 0.000009      | 0.282495           | 0.000014      | 7.48                   | 0.49          | 1.06             | 1.23             |           |
|                  |           | SB2-5    | 801  |               | 0.042892           | 0.000393      | 0.000821           | 0.000009      | 0.282496           | 0.000014      | 7.49                   | 0.50          | 1.06             | 1.23             |           |
|                  |           | SB2-6    | 805  |               | 0.030228           | 0.000047      | 0.000592           | 0.000006      | 0.282438           | 0.000015      | 5.68                   | 0.51          | 1.14             | 1.35             |           |
|                  |           | SB2-7    | 793  |               | 0.023661           | 0.000318      | 0.000475           | 0.000003      | 0.282463           | 0.000013      | 6.35                   | 0.45          | 1.10             | 1.30             |           |
|                  |           | SB2-8    | 839  |               | 0.022857           | 0.000132      | 0.000466           | 0.000005      | 0.282467           | 0.000012      | 7.52                   | 0.41          | 1.09             | 1.26             |           |
|                  |           | SB2-9    | 791  |               | 0.021087           | 0.001348      | 0.000415           | 0.000019      | 0.282423           | 0.000013      | 4.91                   | 0.47          | 1.15             | 1.39             |           |
|                  |           | SB2-10   | 783  |               | 0.034017           | 0.000192      | 0.000700           | 0.000012      | 0.282462           | 0.000013      | 5.97                   | 0.47          | 1.11             | 1.32             |           |
|                  |           | SB2-11   | 780  |               | 0.051751           | 0.000326      | 0.000993           | 0.000006      | 0.282475           | 0.000015      | 6.21                   | 0.54          | 1.10             | 1.30             |           |
|                  |           | SB2-12   | 781  |               | 0.039254           | 0.000743      | 0.000758           | 0.000006      | 0.282469           | 0.000016      | 6.13                   | 0.56          | 1.10             | 1.30             |           |
|                  |           | SB2-13   | 772  |               | 0.047180           | 0.000293      | 0.000938           | 0.000005      | 0.282481           | 0.000015      | 6.28                   | 0.53          | 1.09             | 1.29             |           |
|                  |           | SB2-14   | 783  |               | 0.032745           | 0.000937      | 0.000626           | 0.000007      | 0.282466           | 0.000012      | 6.14                   | 0.42          | 1.10             | 1.30             |           |
|                  |           | SB2-15   | 788  |               | 0.035335           | 0.000685      | 0.000697           | 0.000005      | 0.282443           | 0.000013      | 5.43                   | 0.46          | 1.13             | 1.35             |           |
|                  | SB2-16    | 795      |      | 0.023528      | 0.000495           | 0.000472      | 0.000004           | 0.282434      | 0.000013           | 5.37          | 0.45                   | 1.14          | 1.36             |                  |           |
|                  | SB2-17    | 791      |      | 0.028451      | 0.000446           | 0.000560      | 0.000005           | 0.282441      | 0.000013           | 5.46          | 0.46                   | 1.13          | 1.35             |                  |           |
|                  | SB2-18    | 801      |      | 0.043937      | 0.000531           | 0.000873      | 0.000014           | 0.282507      | 0.000016           | 7.88          | 0.55                   | 1.05          | 1.21             |                  |           |
|                  | SB2-19    | 773      |      | 0.032751      | 0.000269           | 0.000656      | 0.000004           | 0.282496      | 0.000013           | 7.00          | 0.46                   | 1.06          | 1.24             |                  |           |
|                  | SB2-20    | 821      |      | 0.043691      | 0.000555           | 0.000887      | 0.000005           | 0.282470      | 0.000015           | 6.97          | 0.53                   | 1.10          | 1.28             |                  |           |
|                  | SB2-21    | 786      |      | 0.034665      | 0.000188           | 0.000673      | 0.000011           | 0.282486      | 0.000013           | 6.89          | 0.46                   | 1.07          | 1.26             |                  |           |
|                  | SB2-22    | 779      |      | 0.052498      | 0.000176           | 0.001056      | 0.000012           | 0.282499      | 0.000016           | 7.00          | 0.57                   | 1.07          | 1.25             |                  |           |



**Table S4: The isotope results for the Neoproterozoic mafic and adakitic pluton in the western margin of the Yangtze Block**

| Locality | Rock type | Spot    | Best |     | Isotopic ratio     |          |                    |          |                    |          | εHf  | ±1σ  | T <sub>DM1</sub> | T <sub>DM2</sub> | Reference |
|----------|-----------|---------|------|-----|--------------------|----------|--------------------|----------|--------------------|----------|------|------|------------------|------------------|-----------|
|          |           |         | age  |     | <sup>176</sup> Yb/ |          | <sup>176</sup> Lu/ |          | <sup>176</sup> Hf/ |          |      |      |                  |                  |           |
|          |           |         |      |     | <sup>177</sup> Hf  | ±1σ      | <sup>177</sup> Hf  | ±1σ      | <sup>177</sup> Hf  | ±1σ      |      |      |                  |                  |           |
|          |           |         | (Ma) | ±1σ |                    |          |                    |          |                    |          |      |      |                  |                  |           |
|          |           | SB2-23  | 781  |     | 0.039479           | 0.000353 | 0.000797           | 0.000008 | 0.282457           | 0.000015 | 5.71 | 0.53 | 1.12             | 1.33             |           |
|          |           | SB2-24  | 803  |     | 0.044077           | 0.001410 | 0.000890           | 0.000020 | 0.282466           | 0.000015 | 6.47 | 0.52 | 1.11             | 1.30             |           |
|          |           | SB2-25  | 782  |     | 0.047947           | 0.000503 | 0.000952           | 0.000021 | 0.282521           | 0.000014 | 7.94 | 0.51 | 1.03             | 1.19             |           |
|          |           | SB2-26  | 791  |     | 0.071799           | 0.000526 | 0.001424           | 0.000007 | 0.282471           | 0.000016 | 6.08 | 0.57 | 1.12             | 1.31             |           |
|          |           | SB2-27  | 801  |     | 0.040870           | 0.001108 | 0.000783           | 0.000008 | 0.282490           | 0.000014 | 7.31 | 0.50 | 1.07             | 1.24             |           |
|          |           | SB31-1  | 802  |     | 0.033417           | 0.000287 | 0.000647           | 0.000006 | 0.282503           | 0.000014 | 7.88 | 0.49 | 1.05             | 1.21             |           |
|          |           | SB31-2  | 817  |     | 0.020986           | 0.000552 | 0.000404           | 0.000008 | 0.282494           | 0.000012 | 8.00 | 0.40 | 1.06             | 1.21             |           |
|          |           | SB31-3  | 796  |     | 0.038673           | 0.000275 | 0.000713           | 0.000009 | 0.282494           | 0.000014 | 7.38 | 0.48 | 1.06             | 1.24             |           |
|          |           | SB31-4  | 795  |     | 0.020267           | 0.000839 | 0.000391           | 0.000010 | 0.282450           | 0.000014 | 5.96 | 0.47 | 1.12             | 1.33             |           |
|          |           | SB31-5  | 800  |     | 0.038413           | 0.000275 | 0.000706           | 0.000017 | 0.282512           | 0.000014 | 8.10 | 0.50 | 1.04             | 1.19             |           |
|          |           | SB31-6  | 793  |     | 0.035152           | 0.000750 | 0.000676           | 0.000008 | 0.282487           | 0.000012 | 7.10 | 0.41 | 1.07             | 1.25             |           |
|          |           | SB31-7  | 794  |     | 0.044768           | 0.001838 | 0.000764           | 0.000017 | 0.282498           | 0.000013 | 7.46 | 0.46 | 1.06             | 1.23             |           |
|          |           | SB31-8  | 788  |     | 0.036721           | 0.000699 | 0.000660           | 0.000019 | 0.282531           | 0.000012 | 8.54 | 0.43 | 1.01             | 1.15             |           |
|          |           | SB31-9  | 776  |     | 0.048313           | 0.000581 | 0.000878           | 0.000005 | 0.282499           | 0.000015 | 7.05 | 0.53 | 1.06             | 1.24             |           |
|          |           | SB31-10 | 786  |     | 0.046384           | 0.000606 | 0.000805           | 0.000005 | 0.282484           | 0.000015 | 6.77 | 0.52 | 1.08             | 1.27             |           |
|          |           | SB31-11 | 775  |     | 0.020583           | 0.000127 | 0.000402           | 0.000005 | 0.282476           | 0.000015 | 6.44 | 0.51 | 1.08             | 1.28             |           |
|          |           | SB31-12 | 862  |     | 0.022027           | 0.000196 | 0.000429           | 0.000003 | 0.282484           | 0.000013 | 8.64 | 0.44 | 1.07             | 1.21             |           |
|          |           | SB31-13 | 775  |     | 0.026776           | 0.000715 | 0.000497           | 0.000004 | 0.282496           | 0.000016 | 7.13 | 0.56 | 1.05             | 1.24             |           |
|          |           | SB31-14 | 777  |     | 0.023165           | 0.000683 | 0.000434           | 0.000005 | 0.282499           | 0.000013 | 7.30 | 0.45 | 1.05             | 1.23             |           |
|          |           | SB31-15 | 781  |     | 0.031125           | 0.001129 | 0.000562           | 0.000007 | 0.282487           | 0.000017 | 6.88 | 0.59 | 1.07             | 1.26             |           |
|          |           | SB31-16 | 787  |     | 0.035283           | 0.001908 | 0.000674           | 0.000042 | 0.282511           | 0.000013 | 7.80 | 0.47 | 1.04             | 1.20             |           |
|          |           | SB31-17 | 791  |     | 0.049186           | 0.000701 | 0.000873           | 0.000003 | 0.282517           | 0.000016 | 8.01 | 0.57 | 1.04             | 1.19             |           |
|          |           | SB31-18 | 779  |     | 0.051258           | 0.000525 | 0.000903           | 0.000004 | 0.282522           | 0.000014 | 7.92 | 0.50 | 1.03             | 1.19             |           |
|          |           | SB31-19 | 796  |     | 0.025211           | 0.000334 | 0.000469           | 0.000001 | 0.282500           | 0.000016 | 7.71 | 0.56 | 1.05             | 1.21             |           |
|          |           | SB31-20 | 793  |     | 0.035265           | 0.000885 | 0.000650           | 0.000021 | 0.282499           | 0.000013 | 7.54 | 0.46 | 1.05             | 1.22             |           |
|          |           | SB31-21 | 797  |     | 0.017796           | 0.000208 | 0.000331           | 0.000002 | 0.282463           | 0.000013 | 6.50 | 0.46 | 1.10             | 1.29             |           |
|          |           | SB31-22 | 781  |     | 0.032199           | 0.001775 | 0.000571           | 0.000021 | 0.282440           | 0.000015 | 5.22 | 0.51 | 1.13             | 1.36             |           |
|          |           | SB31-23 | 791  |     | 0.033648           | 0.000229 | 0.000627           | 0.000004 | 0.282477           | 0.000016 | 6.72 | 0.57 | 1.08             | 1.27             |           |
|          |           | SB31-24 | 823  |     | 0.020684           | 0.000503 | 0.000401           | 0.000004 | 0.282480           | 0.000015 | 7.65 | 0.53 | 1.07             | 1.24             |           |

**Table S4: The isotope results for the Neoproterozoic mafic and adakitic pluton in the western margin of the Yangtze Block**

| Locality          | Rock type       | Spot    | Best     |               | Isotopic ratio     |               |                    |               |                    |               | $\epsilon_{\text{Hf}}$ | $\pm 1\sigma$ | $T_{\text{DM1}}$ | $T_{\text{DM2}}$ | Reference        |
|-------------------|-----------------|---------|----------|---------------|--------------------|---------------|--------------------|---------------|--------------------|---------------|------------------------|---------------|------------------|------------------|------------------|
|                   |                 |         | age      |               | $^{176}\text{Yb}/$ |               | $^{176}\text{Lu}/$ |               | $^{176}\text{Hf}/$ |               |                        |               |                  |                  |                  |
|                   |                 |         | (Ma)     | $\pm 1\sigma$ | $^{177}\text{Hf}$  | $\pm 1\sigma$ | $^{177}\text{Hf}$  | $\pm 1\sigma$ | $^{177}\text{Hf}$  | $\pm 1\sigma$ |                        |               |                  |                  |                  |
| Dajianshan pluton | Biotite Granite | SB31-25 | 786      |               | 0.031456           | 0.000412      | 0.000576           | 0.000002      | 0.282509           | 0.000013      | 7.77                   | 0.45          | 1.04             | 1.20             | Zhu et al., 2019 |
|                   |                 | SB31-26 | 774      |               | 0.038155           | 0.000546      | 0.000675           | 0.000002      | 0.282488           | 0.000016      | 6.70                   | 0.56          | 1.07             | 1.26             |                  |
|                   |                 | SB31-27 | 812      |               | 0.038127           | 0.001011      | 0.000676           | 0.000008      | 0.282485           | 0.000013      | 7.44                   | 0.46          | 1.08             | 1.24             |                  |
|                   |                 | SB31-28 | 787      |               | 0.044327           | 0.000620      | 0.000816           | 0.000001      | 0.282513           | 0.000015      | 7.80                   | 0.53          | 1.04             | 1.20             |                  |
|                   |                 | SB31-29 | 786      |               | 0.022205           | 0.000256      | 0.000413           | 0.000008      | 0.282492           | 0.000014      | 7.26                   | 0.50          | 1.06             | 1.24             |                  |
|                   |                 | DJS2-1  | 800      |               | 0.031271           | 0.000089      | 0.001108           | 0.000003      | 0.282534           | 0.000009      | 8.07                   | 0.29          | 1.04             | 1.19             |                  |
|                   |                 | DJS2-2  | 800      |               | 0.046562           | 0.000235      | 0.001671           | 0.000010      | 0.282470           | 0.000011      | 5.21                   | 0.39          | 1.16             | 1.37             |                  |
|                   |                 | DJS2-3  | 800      |               | 0.036813           | 0.000068      | 0.001345           | 0.000003      | 0.282430           | 0.000010      | 4.11                   | 0.36          | 1.20             | 1.44             |                  |
|                   |                 | DJS2-4  | 800      |               | 0.070869           | 0.000130      | 0.002240           | 0.000005      | 0.282489           | 0.000011      | 5.27                   | 0.40          | 1.17             | 1.36             |                  |
|                   |                 | DJS2-5  | 800      |               | 0.032548           | 0.000065      | 0.001141           | 0.000003      | 0.282460           | 0.000011      | 5.40                   | 0.37          | 1.15             | 1.36             |                  |
|                   |                 | DJS2-6  | 800      |               | 0.033897           | 0.000044      | 0.001193           | 0.000002      | 0.282411           | 0.000010      | 3.63                   | 0.33          | 1.22             | 1.47             |                  |
|                   |                 | DJS2-7  | 800      |               | 0.026908           | 0.000055      | 0.000931           | 0.000002      | 0.282430           | 0.000009      | 4.58                   | 0.31          | 1.18             | 1.41             |                  |
|                   |                 | DJS2-8  | 800      |               | 0.051382           | 0.000494      | 0.001822           | 0.000018      | 0.282373           | 0.000014      | 1.62                   | 0.49          | 1.31             | 1.59             |                  |
|                   |                 | DJS2-9  | 800      |               | 0.061319           | 0.000141      | 0.001909           | 0.000004      | 0.282384           | 0.000010      | 1.91                   | 0.35          | 1.30             | 1.57             |                  |
|                   |                 | DJS2-10 | 800      |               | 0.036007           | 0.000065      | 0.001298           | 0.000003      | 0.282447           | 0.000010      | 4.79                   | 0.35          | 1.18             | 1.39             |                  |
|                   |                 | DJS2-11 | 800      |               | 0.061119           | 0.000149      | 0.001990           | 0.000005      | 0.282432           | 0.000010      | 3.53                   | 0.36          | 1.23             | 1.47             |                  |
|                   |                 | DJS2-12 | 800      |               | 0.055801           | 0.000160      | 0.001999           | 0.000005      | 0.282476           | 0.000011      | 5.05                   | 0.40          | 1.17             | 1.38             |                  |
|                   |                 | DJS2-13 | 800      |               | 0.024941           | 0.000062      | 0.000869           | 0.000002      | 0.282396           | 0.000007      | 3.44                   | 0.25          | 1.22             | 1.48             |                  |
|                   |                 | DJS2-14 | 800      |               | 0.052439           | 0.000098      | 0.001860           | 0.000004      | 0.282464           | 0.000010      | 4.77                   | 0.35          | 1.18             | 1.39             |                  |
|                   |                 | DJS2-15 | 800      |               | 0.029585           | 0.000087      | 0.001025           | 0.000003      | 0.282410           | 0.000010      | 3.76                   | 0.34          | 1.21             | 1.46             |                  |
|                   |                 | DJS2-16 | 800      |               | 0.024414           | 0.000174      | 0.000841           | 0.000006      | 0.282419           | 0.000009      | 4.29                   | 0.31          | 1.19             | 1.43             |                  |
|                   |                 | DJS2-17 | 800      |               | 0.035372           | 0.000062      | 0.001244           | 0.000003      | 0.282387           | 0.000010      | 2.73                   | 0.34          | 1.26             | 1.52             |                  |
|                   |                 | DJS2-18 | 800      |               | 0.046972           | 0.000044      | 0.001679           | 0.000002      | 0.282523           | 0.000012      | 7.08                   | 0.42          | 1.09             | 1.25             |                  |
|                   |                 | DJS2-19 | 800      |               | 0.028718           | 0.000167      | 0.000941           | 0.000005      | 0.282430           | 0.000010      | 4.57                   | 0.33          | 1.18             | 1.41             |                  |
| DJS2-20           | 800             |         | 0.057188 | 0.000041      | 0.002018           | 0.000002      | 0.282445           | 0.000012      | 3.93               | 0.41          | 1.22                   | 1.45          |                  |                  |                  |
| DJS2-21           | 800             |         | 0.022838 | 0.000048      | 0.000866           | 0.000002      | 0.282409           | 0.000011      | 3.91               | 0.38          | 1.21                   | 1.45          |                  |                  |                  |
| DJS2-22           | 800             |         | 0.038764 | 0.000281      | 0.001246           | 0.000009      | 0.282454           | 0.000008      | 5.10               | 0.28          | 1.16                   | 1.37          |                  |                  |                  |
| DJS2-23           | 800             |         | 0.023426 | 0.000069      | 0.000894           | 0.000003      | 0.282411           | 0.000008      | 3.95               | 0.28          | 1.21                   | 1.45          |                  |                  |                  |
| DJS2-24           | 800             |         | 0.029992 | 0.000111      | 0.001049           | 0.000005      | 0.282440           | 0.000009      | 4.79               | 0.31          | 1.17                   | 1.39          |                  |                  |                  |

**Table S4: The isotope results for the Neoproterozoic mafic and adakitic pluton in the western margin of the Yangtze Block**

| Locality                     | Rock type | Spot        | Best |    | Isotopic ratio     |               |                    |               |                    |               | $\epsilon$ Hf | $\pm 1\sigma$ | $T_{DM1}$ | $T_{DM2}$ | Reference          |
|------------------------------|-----------|-------------|------|----|--------------------|---------------|--------------------|---------------|--------------------|---------------|---------------|---------------|-----------|-----------|--------------------|
|                              |           |             | age  |    | $^{176}\text{Yb}/$ |               | $^{176}\text{Lu}/$ |               | $^{176}\text{Hf}/$ |               |               |               |           |           |                    |
|                              |           |             |      |    | (Ma)               | $\pm 1\sigma$ | $^{177}\text{Hf}$  | $\pm 1\sigma$ | $^{177}\text{Hf}$  | $\pm 1\sigma$ |               |               |           |           |                    |
| Mopanshan intrusion (782 Ma) | Granite   | MPS05-03-02 | 948  | 13 | 0.033300           |               | 0.00133            |               | 0.282360           | 0.000014      | 5.56          | 0.43          | 1.27      |           | Huang et al., 2009 |
|                              |           | MPS05-03-06 | 862  | 12 | 0.020589           |               | 0.00083            |               | 0.282406           | 0.000015      | 5.61          | 0.51          | 1.19      |           |                    |
|                              |           | MPS05-03-07 | 829  | 11 | 0.014710           |               | 0.000598           |               | 0.282396           | 0.000012      | 4.67          | 0.42          | 1.20      |           |                    |
|                              |           | MPS05-03-08 | 903  | 12 | 0.028494           |               | 0.001126           |               | 0.282361           | 0.000012      | 4.75          | 0.42          | 1.26      |           |                    |
|                              |           | MPS05-03-09 | 893  | 12 | 0.033790           |               | 0.001255           |               | 0.282358           | 0.000017      | 4.33          | 0.59          | 1.27      |           |                    |
|                              |           | MPS05-03-11 | 1051 | 14 | 0.026748           |               | 0.001077           |               | 0.282394           | 0.000011      | 9.15          | 0.37          | 1.22      |           |                    |
|                              |           | MPS05-03-14 | 1157 | 18 | 0.024720           |               | 0.000997           |               | 0.282356           | 0.000018      | 10.16         | 0.64          | 1.27      |           |                    |
| Dajianshan                   | Granite   | DT10-1      | 841  | 8  | 0.021900           | 0.002000      | 0.000903           | 0.000079      | 0.282425           | 0.000013      | 5.82          | 0.44          | 1.17      | 1.37      | Zhao et al., 2021  |
|                              |           | DT10-2      | 884  | 70 | 0.011982           | 0.000296      | 0.000504           | 0.000009      | 0.282418           | 0.000016      | 6.72          | 0.55          | 1.16      | 1.35      |                    |
|                              |           | DT10-3      | 802  | 8  | 0.011955           | 0.000391      | 0.000505           | 0.000014      | 0.282407           | 0.000017      | 4.51          | 0.58          | 1.18      | 1.42      |                    |
|                              |           | DT10-4      | 819  | 7  | 0.014088           | 0.000077      | 0.000626           | 0.000003      | 0.282413           | 0.000013      | 5.04          | 0.47          | 1.18      | 1.40      |                    |
|                              |           | DT10-5      | 804  | 7  | 0.015778           | 0.000169      | 0.000732           | 0.000008      | 0.282418           | 0.000015      | 4.85          | 0.52          | 1.17      | 1.40      |                    |
|                              |           | DT10-6      | 819  | 9  | 0.014341           | 0.000332      | 0.000631           | 0.000013      | 0.282419           | 0.000012      | 5.28          | 0.41          | 1.17      | 1.39      |                    |
|                              |           | DT10-7      | 799  | 7  | 0.009620           | 0.000040      | 0.000443           | 0.000001      | 0.282405           | 0.000011      | 4.42          | 0.37          | 1.18      | 1.43      |                    |
|                              |           | DT10-8      | 785  | 8  | 0.011725           | 0.000180      | 0.000513           | 0.000009      | 0.282401           | 0.000012      | 3.94          | 0.41          | 1.19      | 1.45      |                    |
|                              |           | DT10-9      | 800  | 6  | 0.011197           | 0.000408      | 0.000520           | 0.000019      | 0.282420           | 0.000014      | 4.93          | 0.48          | 1.16      | 1.40      |                    |
|                              |           | DT10-10     | 800  | 7  | 0.014064           | 0.000113      | 0.000649           | 0.000005      | 0.282412           | 0.000017      | 4.56          | 0.58          | 1.18      | 1.42      |                    |
|                              |           | DT10-11     | 795  | 7  | 0.014002           | 0.000174      | 0.000632           | 0.000008      | 0.282414           | 0.000016      | 4.56          | 0.57          | 1.17      | 1.42      |                    |
|                              |           | DT10-12     | 790  | 8  | 0.013829           | 0.000322      | 0.000616           | 0.000012      | 0.282421           | 0.000013      | 4.68          | 0.45          | 1.16      | 1.40      |                    |
|                              |           | DT10-13     | 798  | 7  | 0.019940           | 0.000202      | 0.000901           | 0.000009      | 0.282431           | 0.000011      | 5.08          | 0.40          | 1.16      | 1.39      |                    |
|                              |           | DT10-14     | 771  | 8  | 0.015960           | 0.000248      | 0.000661           | 0.000010      | 0.282415           | 0.000011      | 4.04          | 0.38          | 1.17      | 1.43      |                    |
|                              |           | DT10-15     | 800  | 7  | 0.033204           | 0.001418      | 0.001399           | 0.000058      | 0.282452           | 0.000012      | 5.59          | 0.42          | 1.14      | 1.35      |                    |
|                              |           | DT10-16     | 693  | 9  | 0.022002           | 0.000522      | 0.000970           | 0.000019      | 0.282429           | 0.000011      | 2.70          | 0.38          | 1.16      | 1.46      |                    |
|                              |           | DT10-17     | 794  | 7  | 0.016420           | 0.000572      | 0.000726           | 0.000024      | 0.282425           | 0.000015      | 4.87          | 0.51          | 1.16      | 1.40      |                    |
|                              |           | DT10-18     | 794  | 9  | 0.014473           | 0.000169      | 0.000597           | 0.000006      | 0.282426           | 0.000018      | 4.98          | 0.62          | 1.16      | 1.39      |                    |
|                              |           | DT10-19     | 797  | 8  | 0.022299           | 0.000256      | 0.000933           | 0.000011      | 0.282415           | 0.000011      | 4.47          | 0.39          | 1.18      | 1.42      |                    |
|                              |           | DT10-20     | 809  | 7  | 0.020407           | 0.000304      | 0.000909           | 0.000012      | 0.282414           | 0.000012      | 4.70          | 0.41          | 1.18      | 1.42      |                    |
|                              |           | DT10-21     | 800  | 6  | 0.017453           | 0.000368      | 0.000779           | 0.000017      | 0.282444           | 0.000011      | 5.66          | 0.39          | 1.14      | 1.35      |                    |
|                              |           | DT10-22     | 797  | 8  | 0.026102           | 0.000505      | 0.001057           | 0.000019      | 0.282450           | 0.000013      | 5.65          | 0.44          | 1.14      | 1.35      |                    |

**Table S4: The isotope results for the Neoproterozoic mafic and adakitic pluton in the western margin of the Yangtze Block**

| Locality | Rock type | Spot    | Best |     | Isotopic ratio     |          |                    |          |                    |          | εHf  | ±1σ  | T <sub>DM1</sub> | T <sub>DM2</sub> | Reference |
|----------|-----------|---------|------|-----|--------------------|----------|--------------------|----------|--------------------|----------|------|------|------------------|------------------|-----------|
|          |           |         | age  |     | <sup>176</sup> Yb/ |          | <sup>176</sup> Lu/ |          | <sup>176</sup> Hf/ |          |      |      |                  |                  |           |
|          |           |         | (Ma) | ±1σ | <sup>177</sup> Hf  | ±1σ      | <sup>177</sup> Hf  | ±1σ      | <sup>177</sup> Hf  | ±1σ      |      |      |                  |                  |           |
|          |           | DT10-23 | 785  | 9   | 0.014949           | 0.000599 | 0.000626           | 0.000024 | 0.282426           | 0.000011 | 4.78 | 0.37 | 1.16             | 1.39             |           |
|          |           | DT10-24 | 777  | 11  | 0.015669           | 0.000553 | 0.000657           | 0.000020 | 0.282453           | 0.000012 | 5.51 | 0.43 | 1.12             | 1.34             |           |
|          |           | DT10-25 | 798  | 11  | 0.014365           | 0.000383 | 0.000636           | 0.000017 | 0.282445           | 0.000012 | 5.72 | 0.42 | 1.13             | 1.34             |           |
|          |           | DT10-26 | 816  | 8   | 0.019146           | 0.000398 | 0.000859           | 0.000018 | 0.282433           | 0.000011 | 5.57 | 0.38 | 1.15             | 1.37             |           |
|          |           | DT10-27 | 802  | 8   | 0.014167           | 0.000234 | 0.000582           | 0.000010 | 0.282407           | 0.000010 | 4.50 | 0.35 | 1.18             | 1.43             |           |
|          |           | DT10-28 | 820  | 7   | 0.014917           | 0.000181 | 0.000659           | 0.000009 | 0.282429           | 0.000009 | 5.61 | 0.33 | 1.15             | 1.37             |           |
|          |           | DT10-29 | 800  | 8   | 0.009747           | 0.000095 | 0.000389           | 0.000002 | 0.282427           | 0.000010 | 5.23 | 0.35 | 1.15             | 1.38             |           |
|          |           | DT10-30 | 797  | 10  | 0.011558           | 0.000540 | 0.000461           | 0.000021 | 0.282429           | 0.000010 | 5.23 | 0.36 | 1.15             | 1.37             |           |
|          |           | DT16-1  | 772  | 9   | 0.012213           | 0.000057 | 0.000518           | 0.000002 | 0.282445           | 0.000010 | 5.21 | 0.37 | 1.13             | 1.36             |           |
|          |           | DT16-2  | 775  | 9   | 0.011062           | 0.000114 | 0.000472           | 0.000005 | 0.282442           | 0.000012 | 5.17 | 0.42 | 1.13             | 1.36             |           |
|          |           | DT16-3  | 801  | 8   | 0.014654           | 0.000136 | 0.000610           | 0.000006 | 0.282452           | 0.000011 | 6.04 | 0.37 | 1.12             | 1.33             |           |
|          |           | DT16-4  | 845  | 10  | 0.015537           | 0.000631 | 0.000644           | 0.000025 | 0.282443           | 0.000011 | 6.96 | 0.33 | 1.12             | 1.30             |           |
|          |           | DT16-5  | 804  | 10  | 0.008800           | 0.000126 | 0.000382           | 0.000005 | 0.282447           | 0.000010 | 5.77 | 0.40 | 1.13             | 1.35             |           |
|          |           | DT16-6  | 793  | 10  | 0.010905           | 0.000089 | 0.000467           | 0.000004 | 0.282458           | 0.000010 | 6.13 | 0.35 | 1.11             | 1.31             |           |
|          |           | DT16-7  | 840  | 12  | 0.015943           | 0.000364 | 0.000658           | 0.000013 | 0.282446           | 0.000012 | 6.67 | 0.43 | 1.13             | 1.32             |           |
|          |           | DT16-8  | 799  | 9   | 0.010603           | 0.000167 | 0.000452           | 0.000007 | 0.282422           | 0.000011 | 5.02 | 0.40 | 1.16             | 1.39             |           |
|          |           | DT16-9  | 806  | 10  | 0.013223           | 0.000112 | 0.000556           | 0.000005 | 0.282446           | 0.000012 | 5.95 | 0.43 | 1.13             | 1.34             |           |
|          |           | DT16-10 | 803  | 8   | 0.011874           | 0.000020 | 0.000504           | 0.000001 | 0.282444           | 0.000011 | 5.87 | 0.39 | 1.13             | 1.34             |           |
|          |           | DT16-11 | 804  | 8   | 0.011455           | 0.000113 | 0.000490           | 0.000004 | 0.282451           | 0.000011 | 6.14 | 0.38 | 1.12             | 1.32             |           |
|          |           | DT16-12 | 807  | 9   | 0.020810           | 0.000547 | 0.000855           | 0.000020 | 0.282459           | 0.000012 | 6.27 | 0.41 | 1.12             | 1.32             |           |
|          |           | DT16-13 | 814  | 9   | 0.017417           | 0.000161 | 0.000717           | 0.000006 | 0.282454           | 0.000012 | 6.32 | 0.41 | 1.12             | 1.32             |           |
|          |           | DT16-14 | 803  | 9   | 0.010415           | 0.000167 | 0.000444           | 0.000007 | 0.282455           | 0.000010 | 6.29 | 0.34 | 1.11             | 1.31             |           |
|          |           | DT16-15 | 805  | 8   | 0.033076           | 0.000634 | 0.001359           | 0.000027 | 0.282458           | 0.000012 | 5.92 | 0.43 | 1.14             | 1.34             |           |
|          |           | DT16-16 | 801  | 8   | 0.026649           | 0.000191 | 0.001083           | 0.000008 | 0.282455           | 0.000013 | 5.90 | 0.47 | 1.13             | 1.34             |           |
|          |           | DT16-17 | 799  | 9   | 0.010561           | 0.000206 | 0.000451           | 0.000008 | 0.282442           | 0.000009 | 5.73 | 0.33 | 1.13             | 1.34             |           |
|          |           | DT16-18 | 799  | 10  | 0.011670           | 0.000254 | 0.000496           | 0.000010 | 0.282425           | 0.000010 | 5.10 | 0.33 | 1.15             | 1.38             |           |
|          |           | DT16-19 | 794  | 8   | 0.011620           | 0.000103 | 0.000496           | 0.000004 | 0.282443           | 0.000009 | 5.64 | 0.32 | 1.13             | 1.35             |           |
|          |           | DT16-20 | 807  | 7   | 0.017848           | 0.000620 | 0.000731           | 0.000023 | 0.282435           | 0.000011 | 5.52 | 0.40 | 1.15             | 1.36             |           |
|          |           | DT16-21 | 859  | 11  | 0.011249           | 0.000155 | 0.000482           | 0.000006 | 0.282446           | 0.000009 | 7.17 | 0.31 | 1.13             | 1.30             |           |

**Table S4: The isotope results for the Neoproterozoic mafic and adakitic pluton in the western margin of the Yangtze Block**

| Locality          | Rock type | Spot     | Best |               | Isotopic ratio     |               |                    |               |                    |               | $\epsilon_{\text{Hf}}$ | $\pm 1\sigma$ | $T_{\text{DM1}}$ | $T_{\text{DM2}}$ | Reference |
|-------------------|-----------|----------|------|---------------|--------------------|---------------|--------------------|---------------|--------------------|---------------|------------------------|---------------|------------------|------------------|-----------|
|                   |           |          | age  |               | $^{176}\text{Yb}/$ |               | $^{176}\text{Lu}/$ |               | $^{176}\text{Hf}/$ |               |                        |               | $(\text{Ma})$    | $(\text{Ma})$    |           |
|                   |           |          | (Ma) | $\pm 1\sigma$ | $^{177}\text{Hf}$  | $\pm 1\sigma$ | $^{177}\text{Hf}$  | $\pm 1\sigma$ | $^{177}\text{Hf}$  | $\pm 1\sigma$ |                        |               |                  |                  |           |
| Dajianshan pluton |           | DT16-22  | 855  | 13            | 0.013407           | 0.000045      | 0.000561           | 0.000002      | 0.282459           | 0.000012      | 7.50                   | 0.43          | 1.11             | 1.27             |           |
|                   |           | DT16-23  | 802  | 10            | 0.012262           | 0.000137      | 0.000520           | 0.000006      | 0.282446           | 0.000010      | 5.91                   | 0.36          | 1.13             | 1.34             |           |
|                   |           | DT16-24  | 799  | 9             | 0.011032           | 0.000046      | 0.000472           | 0.000002      | 0.282442           | 0.000010      | 5.70                   | 0.36          | 1.13             | 1.35             |           |
|                   |           | DT16-25  | 807  | 10            | 0.011426           | 0.000066      | 0.000494           | 0.000002      | 0.282447           | 0.000010      | 6.05                   | 0.35          | 1.12             | 1.33             |           |
|                   |           | DJS11-1  | 820  | 10            | 0.012400           | 0.000149      | 0.000567           | 0.000009      | 0.282450           | 0.000014      | 6.41                   | 0.49          | 1.12             | 1.32             |           |
|                   |           | DJS11-2  | 803  | 8             | 0.026933           | 0.001124      | 0.001215           | 0.000049      | 0.282453           | 0.000011      | 5.80                   | 0.39          | 1.14             | 1.34             |           |
|                   |           | DJS11-3  | 805  | 8             | 0.011830           | 0.000148      | 0.000578           | 0.000008      | 0.282453           | 0.000010      | 6.19                   | 0.35          | 1.12             | 1.32             |           |
|                   |           | DJS11-4  | 806  | 8             | 0.018489           | 0.000528      | 0.000869           | 0.000024      | 0.282460           | 0.000012      | 6.31                   | 0.43          | 1.12             | 1.31             |           |
|                   |           | DJS11-5  | 802  | 9             | 0.011593           | 0.000132      | 0.000525           | 0.000005      | 0.282442           | 0.000013      | 5.76                   | 0.44          | 1.13             | 1.34             |           |
|                   |           | DJS11-6  | 802  | 8             | 0.019833           | 0.000513      | 0.000943           | 0.000023      | 0.282449           | 0.000011      | 5.78                   | 0.39          | 1.13             | 1.34             |           |
|                   |           | DJS11-7  | 797  | 9             | 0.013789           | 0.000431      | 0.000635           | 0.000020      | 0.282453           | 0.000014      | 5.98                   | 0.48          | 1.12             | 1.33             |           |
|                   |           | DJS11-8  | 792  | 9             | 0.005646           | 0.000110      | 0.000304           | 0.000006      | 0.282436           | 0.000013      | 5.46                   | 0.46          | 1.13             | 1.36             |           |
|                   |           | DJS11-9  | 800  | 7             | 0.020438           | 0.000497      | 0.000924           | 0.000023      | 0.282457           | 0.000012      | 6.00                   | 0.42          | 1.12             | 1.33             |           |
|                   |           | DJS11-10 | 805  | 7             | 0.014847           | 0.000477      | 0.000671           | 0.000025      | 0.282448           | 0.000013      | 5.95                   | 0.45          | 1.13             | 1.33             |           |
|                   |           | DJS11-11 | 803  | 7             | 0.026645           | 0.000764      | 0.001179           | 0.000031      | 0.282466           | 0.000014      | 6.27                   | 0.47          | 1.12             | 1.31             |           |
|                   |           | DJS11-12 | 779  | 7             | 0.021326           | 0.000147      | 0.000991           | 0.000006      | 0.282442           | 0.000013      | 5.00                   | 0.44          | 1.15             | 1.38             |           |
|                   |           | DJS11-13 | 793  | 9             | 0.013865           | 0.000200      | 0.000661           | 0.000009      | 0.282463           | 0.000011      | 6.22                   | 0.38          | 1.11             | 1.31             |           |
|                   |           | DJS11-14 | 783  | 10            | 0.013728           | 0.000406      | 0.00064            | 0.000019      | 0.28246            | 0.000014      | 5.92                   | 0.48          | 1.11             | 1.32             |           |
|                   |           | DJS11-15 | 792  | 9             | 0.01137            | 0.000103      | 0.000509           | 0.000005      | 0.282442           | 0.000010      | 5.53                   | 0.34          | 1.13             | 1.35             |           |
|                   |           | DJS11-16 | 801  | 8             | 0.028026           | 0.000688      | 0.001286           | 0.000027      | 0.282452           | 0.000010      | 5.67                   | 0.36          | 1.14             | 1.35             |           |
|                   |           | DJS11-17 | 807  | 7             | 0.012506           | 0.000064      | 0.000586           | 0.000003      | 0.282451           | 0.000010      | 6.15                   | 0.36          | 1.12             | 1.32             |           |
|                   |           | DJS11-18 | 805  | 9             | 0.011363           | 0.000055      | 0.0005             | 0.000003      | 0.28244            | 0.000011      | 5.77                   | 0.37          | 1.13             | 1.35             |           |
|                   |           | DJS11-19 | 811  | 10            | 0.012547           | 0.000064      | 0.000555           | 0.000003      | 0.282453           | 0.000013      | 6.33                   | 0.47          | 1.12             | 1.32             |           |
|                   |           | DJS11-20 | 781  | 7             | 0.024924           | 0.000625      | 0.001165           | 0.000027      | 0.282475           | 0.000014      | 6.14                   | 0.50          | 1.10             | 1.30             |           |
|                   |           | DJS11-21 | 794  | 8             | 0.012702           | 0.000588      | 0.00058            | 0.000026      | 0.282445           | 0.000012      | 5.65                   | 0.44          | 1.13             | 1.35             |           |
|                   | DJS11-22  | 803      | 8    | 0.017679      | 0.000243           | 0.000778      | 0.000011           | 0.28244       | 0.000015           | 5.58          | 0.51                   | 1.14          | 1.36             |                  |           |
|                   | DJS11-23  | 799      | 8    | 0.012202      | 0.000126           | 0.000536      | 0.000005           | 0.282441      | 0.000012           | 5.63          | 0.42                   | 1.13          | 1.35             |                  |           |
|                   | DJS11-24  | 799      | 6    | 0.017935      | 0.000339           | 0.000854      | 0.000018           | 0.282447      | 0.000011           | 5.67          | 0.39                   | 1.14          | 1.35             |                  |           |
|                   | DJS11-25  | 785      | 7    | 0.014724      | 0.000051           | 0.000681      | 0.000002           | 0.282431      | 0.000012           | 4.91          | 0.43                   | 1.15          | 1.39             |                  |           |

**Table S4: The isotope results for the Neoproterozoic mafic and adakitic pluton in the western margin of the Yangtze Block**

| Locality | Rock type | Spot     | Best |     | Isotopic ratio     |          |                    |          |                    |          | εHf  | ±1σ  | T <sub>DM1</sub> | T <sub>DM2</sub> | Reference |
|----------|-----------|----------|------|-----|--------------------|----------|--------------------|----------|--------------------|----------|------|------|------------------|------------------|-----------|
|          |           |          | age  |     | <sup>176</sup> Yb/ |          | <sup>176</sup> Lu/ |          | <sup>176</sup> Hf/ |          |      |      |                  |                  |           |
|          |           |          | (Ma) | ±1σ | <sup>177</sup> Hf  | ±1σ      | <sup>177</sup> Hf  | ±1σ      | <sup>177</sup> Hf  | ±1σ      |      |      |                  |                  |           |
|          |           | DJS11-26 | 787  | 10  | 0.012204           | 0.000143 | 0.000523           | 0.000006 | 0.282439           | 0.000012 | 5.32 | 0.43 | 1.14             | 1.36             |           |
|          |           | DJS11-27 | 801  | 10  | 0.013161           | 0.000941 | 0.00056            | 0.000037 | 0.282426           | 0.000011 | 5.15 | 0.39 | 1.15             | 1.38             |           |
|          |           | DJS11-28 | 795  | 10  | 0.014594           | 0.000183 | 0.000646           | 0.000008 | 0.282424           | 0.000012 | 4.89 | 0.43 | 1.16             | 1.40             |           |
|          |           | DJS12-1  | 796  | 6   | 0.023634           | 0.000362 | 0.001114           | 0.000014 | 0.282444           | 0.000014 | 5.39 | 0.51 | 1.15             | 1.36             |           |
|          |           | DJS12-2  | 800  | 8   | 0.013281           | 0.000081 | 0.000617           | 0.000004 | 0.282423           | 0.000011 | 4.99 | 0.38 | 1.16             | 1.39             |           |
|          |           | DJS12-3  | 804  | 7   | 0.026724           | 0.000750 | 0.001157           | 0.000030 | 0.282444           | 0.000011 | 5.53 | 0.37 | 1.15             | 1.36             |           |
|          |           | DJS12-4  | 802  | 7   | 0.014493           | 0.000193 | 0.000704           | 0.000009 | 0.282444           | 0.000011 | 5.71 | 0.40 | 1.13             | 1.35             |           |
|          |           | DJS12-5  | 805  | 9   | 0.017544           | 0.000348 | 0.00082            | 0.000014 | 0.28248            | 0.000012 | 7.00 | 0.44 | 1.09             | 1.27             |           |
|          |           | DJS12-6  | 809  | 8   | 0.013092           | 0.000084 | 0.000636           | 0.000004 | 0.282439           | 0.000010 | 5.75 | 0.35 | 1.14             | 1.35             |           |
|          |           | DJS12-7  | 797  | 9   | 0.011609           | 0.000345 | 0.000518           | 0.000015 | 0.28244            | 0.000010 | 5.57 | 0.36 | 1.13             | 1.35             |           |
|          |           | DJS12-8  | 803  | 7   | 0.016069           | 0.000177 | 0.000782           | 0.000008 | 0.282446           | 0.000011 | 5.76 | 0.38 | 1.13             | 1.35             |           |
|          |           | DJS12-9  | 797  | 8   | 0.019609           | 0.000947 | 0.000896           | 0.000043 | 0.282448           | 0.000012 | 5.67 | 0.43 | 1.13             | 1.35             |           |
|          |           | DJS12-10 | 809  | 7   | 0.020276           | 0.000530 | 0.000937           | 0.000024 | 0.282436           | 0.000014 | 5.47 | 0.49 | 1.15             | 1.37             |           |
|          |           | DJS12-11 | 797  | 18  | 0.026781           | 0.000445 | 0.001188           | 0.000018 | 0.282455           | 0.000012 | 5.74 | 0.43 | 1.13             | 1.34             |           |
|          |           | DJS12-12 | 807  | 8   | 0.009463           | 0.000058 | 0.000447           | 0.000002 | 0.282419           | 0.000010 | 5.07 | 0.36 | 1.16             | 1.39             |           |
|          |           | DJS12-13 | 804  | 8   | 0.025226           | 0.000552 | 0.001185           | 0.000024 | 0.282438           | 0.000013 | 5.31 | 0.44 | 1.16             | 1.38             |           |
|          |           | DJS12-14 | 796  | 7   | 0.016501           | 0.000586 | 0.00075            | 0.000028 | 0.282423           | 0.000010 | 4.85 | 0.35 | 1.16             | 1.40             |           |
|          |           | DJS12-15 | 810  | 7   | 0.008457           | 0.000093 | 0.00042            | 0.000004 | 0.282434           | 0.000010 | 5.71 | 0.35 | 1.14             | 1.35             |           |
|          |           | DJS12-16 | 802  | 6   | 0.021063           | 0.000113 | 0.00098            | 0.000006 | 0.282428           | 0.000010 | 5.00 | 0.36 | 1.17             | 1.39             |           |
|          |           | DJS12-17 | 796  | 6   | 0.021504           | 0.000428 | 0.00101            | 0.000021 | 0.282442           | 0.000010 | 5.37 | 0.37 | 1.15             | 1.37             |           |
|          |           | DJS12-18 | 800  | 7   | 0.016658           | 0.000142 | 0.000762           | 0.000008 | 0.282446           | 0.000011 | 5.72 | 0.38 | 1.13             | 1.35             |           |
|          |           | DJS12-19 | 800  | 7   | 0.016704           | 0.000299 | 0.000821           | 0.000015 | 0.282447           | 0.000010 | 5.74 | 0.35 | 1.13             | 1.34             |           |
|          |           | DJS12-20 | 801  | 8   | 0.016984           | 0.000074 | 0.000756           | 0.000004 | 0.282421           | 0.000012 | 4.87 | 0.43 | 1.17             | 1.40             |           |
|          |           | DJS12-21 | 796  | 8   | 0.010421           | 0.000131 | 0.000498           | 0.000007 | 0.28245            | 0.000010 | 5.91 | 0.36 | 1.12             | 1.33             |           |
|          |           | DJS12-22 | 743  | 9   | 0.014869           | 0.000242 | 0.000662           | 0.000011 | 0.282417           | 0.000011 | 3.50 | 0.39 | 1.17             | 1.44             |           |
|          |           | DJS12-23 | 775  | 12  | 0.01307            | 0.000274 | 0.0006             | 0.000012 | 0.282448           | 0.000011 | 5.33 | 0.39 | 1.13             | 1.35             |           |
|          |           | DJS12-24 | 770  | 10  | 0.016083           | 0.000136 | 0.000755           | 0.000008 | 0.282448           | 0.000009 | 5.13 | 0.33 | 1.13             | 1.36             |           |
|          |           | DJS12-25 | 751  | 10  | 0.008996           | 0.000225 | 0.000433           | 0.000011 | 0.282416           | 0.000008 | 3.77 | 0.29 | 1.16             | 1.43             |           |
|          |           | DJS12-26 | 797  | 10  | 0.02132            | 0.000164 | 0.000918           | 0.000007 | 0.282439           | 0.000010 | 5.35 | 0.35 | 1.15             | 1.37             |           |

**Table S4: The isotope results for the Neoproterozoic mafic and adakitic pluton in the western margin of the Yangtze Block**

| Locality         | Rock type | Spot     | Best |          | Isotopic ratio     |          |                    |          |                    |          | εHf  | ±1σ  | T <sub>DM1</sub> | T <sub>DM2</sub> | Reference |
|------------------|-----------|----------|------|----------|--------------------|----------|--------------------|----------|--------------------|----------|------|------|------------------|------------------|-----------|
|                  |           |          | age  |          | <sup>176</sup> Yb/ |          | <sup>176</sup> Lu/ |          | <sup>176</sup> Hf/ |          |      |      |                  |                  |           |
|                  |           |          | (Ma) | ±1σ      | <sup>177</sup> Hf  | ±1σ      | <sup>177</sup> Hf  | ±1σ      | <sup>177</sup> Hf  | ±1σ      |      |      |                  |                  |           |
| Mopanshan pluton |           | DJS12-27 | 806  | 10       | 0.016313           | 0.000214 | 0.000714           | 0.000009 | 0.282435           | 0.000010 | 5.48 | 0.35 | 1.15             | 1.37             |           |
|                  |           | DJS12-28 | 816  | 10       | 0.02436            | 0.000455 | 0.001161           | 0.000022 | 0.282445           | 0.000010 | 5.84 | 0.37 | 1.15             | 1.35             |           |
|                  |           | DJS12-29 | 800  | 7        | 0.020435           | 0.000342 | 0.000898           | 0.000015 | 0.282434           | 0.000011 | 5.23 | 0.37 | 1.15             | 1.38             |           |
|                  |           | DJS12-30 | 799  | 7        | 0.012348           | 0.000383 | 0.000584           | 0.000016 | 0.282431           | 0.000012 | 5.26 | 0.41 | 1.15             | 1.37             |           |
|                  |           | MPS1-1   | 799  | 6        | 0.026638           | 0.000337 | 0.001201           | 0.000014 | 0.282448           | 0.000013 | 5.53 | 0.47 | 1.14             | 1.36             |           |
|                  |           | MPS1-2   | 781  | 8        | 0.037254           | 0.000554 | 0.001539           | 0.000021 | 0.282419           | 0.000013 | 3.96 | 0.47 | 1.20             | 1.44             |           |
|                  |           | MPS1-3   | 778  | 9        | 0.016453           | 0.000439 | 0.000758           | 0.000019 | 0.282465           | 0.000014 | 5.94 | 0.50 | 1.11             | 1.31             |           |
|                  |           | MPS1-4   | 774  | 15       | 0.02786            | 0.000462 | 0.001197           | 0.000021 | 0.282442           | 0.000013 | 4.78 | 0.45 | 1.15             | 1.39             |           |
|                  |           | MPS1-5   | 777  | 8        | 0.037799           | 0.000358 | 0.001744           | 0.000016 | 0.282486           | 0.000013 | 6.12 | 0.44 | 1.11             | 1.30             |           |
|                  |           | MPS1-6   | 781  | 11       | 0.03495            | 0.000746 | 0.001457           | 0.000031 | 0.282428           | 0.000013 | 4.30 | 0.45 | 1.18             | 1.42             |           |
|                  |           | MPS1-7   | 772  | 10       | 0.019432           | 0.000405 | 0.000829           | 0.000016 | 0.282442           | 0.000017 | 4.93 | 0.60 | 1.14             | 1.37             |           |
|                  |           | MPS1-8   | 736  | 11       | 0.029456           | 0.000345 | 0.001218           | 0.000015 | 0.282441           | 0.000012 | 3.91 | 0.43 | 1.15             | 1.41             |           |
|                  |           | MPS1-9   | 736  | 8        | 0.033411           | 0.000525 | 0.001349           | 0.000018 | 0.282453           | 0.000013 | 4.28 | 0.46 | 1.14             | 1.39             |           |
|                  |           | MPS1-10  | 739  | 8        | 0.026955           | 0.000700 | 0.001088           | 0.000026 | 0.282445           | 0.000013 | 4.21 | 0.47 | 1.14             | 1.40             |           |
|                  |           | MPS1-11  | 779  | 8        | 0.029267           | 0.000253 | 0.001261           | 0.000013 | 0.282458           | 0.000014 | 5.44 | 0.48 | 1.13             | 1.35             |           |
|                  |           | MPS1-12  | 779  | 12       | 0.03733            | 0.000246 | 0.001565           | 0.000009 | 0.282419           | 0.000015 | 3.90 | 0.53 | 1.20             | 1.45             |           |
|                  |           | MPS1-13  | 775  | 23       | 0.032093           | 0.000802 | 0.001335           | 0.000032 | 0.282433           | 0.000013 | 4.41 | 0.45 | 1.17             | 1.41             |           |
|                  |           | MPS1-14  | 783  | 7        | 0.030628           | 0.000950 | 0.001244           | 0.000034 | 0.282444           | 0.000011 | 5.05 | 0.37 | 1.15             | 1.38             |           |
|                  |           | MPS1-15  | 843  | 9        | 0.022873           | 0.000344 | 0.000975           | 0.000014 | 0.282439           | 0.000011 | 6.28 | 0.40 | 1.15             | 1.34             |           |
|                  |           | MPS1-16  | 792  | 7        | 0.0181             | 0.000462 | 0.000697           | 0.000015 | 0.282432           | 0.000010 | 5.07 | 0.37 | 1.15             | 1.38             |           |
|                  |           | MPS1-17  | 782  | 7        | 0.017667           | 0.000394 | 0.000769           | 0.000016 | 0.282454           | 0.000012 | 5.60 | 0.43 | 1.12             | 1.34             |           |
|                  |           | MPS1-18  | 783  | 6        | 0.024451           | 0.000529 | 0.000986           | 0.000019 | 0.282425           | 0.000014 | 4.49 | 0.49 | 1.17             | 1.41             |           |
|                  |           | MPS1-19  | 807  | 7        | 0.022457           | 0.000318 | 0.000967           | 0.000011 | 0.282431           | 0.000015 | 5.23 | 0.54 | 1.16             | 1.38             |           |
|                  |           | MPS1-20  | 784  | 8        | 0.03286            | 0.000732 | 0.001376           | 0.000028 | 0.282434           | 0.000015 | 4.65 | 0.53 | 1.17             | 1.40             |           |
|                  |           | MPS1-21  | 885  | 13       | 0.0536             | 0.001059 | 0.002181           | 0.000043 | 0.282412           | 0.000018 | 5.54 | 0.62 | 1.23             | 1.42             |           |
|                  | MPS1-22   | 797      | 8    | 0.029686 | 0.000324           | 0.001234 | 0.000013           | 0.282431 | 0.000013           | 4.88     | 0.47 | 1.17 | 1.40             |                  |           |
|                  | MPS1-23   | 780      | 12   | 0.027542 | 0.000535           | 0.001136 | 0.000022           | 0.282439 | 0.000013           | 4.84     | 0.45 | 1.15 | 1.39             |                  |           |
|                  | MPS1-24   | 784      | 11   | 0.026281 | 0.001126           | 0.001064 | 0.000045           | 0.282423 | 0.000013           | 4.42     | 0.45 | 1.17 | 1.42             |                  |           |
|                  | MPS1-25   | 781      | 7    | 0.027436 | 0.000723           | 0.001157 | 0.000028           | 0.282435 | 0.000013           | 4.70     | 0.47 | 1.16 | 1.40             |                  |           |

**Table S4: The isotope results for the Neoproterozoic mafic and adakitic pluton in the western margin of the Yangtze Block**

| Locality              | Rock type | Spot    | Best |          | Isotopic ratio     |          |                    |          |                    |          | εHf  | ±1σ  | T <sub>DM1</sub> | T <sub>DM2</sub> | Reference |
|-----------------------|-----------|---------|------|----------|--------------------|----------|--------------------|----------|--------------------|----------|------|------|------------------|------------------|-----------|
|                       |           |         | age  |          | <sup>176</sup> Yb/ |          | <sup>176</sup> Lu/ |          | <sup>176</sup> Hf/ |          |      |      |                  |                  |           |
|                       |           |         | (Ma) | ±1σ      | <sup>177</sup> Hf  | ±1σ      | <sup>177</sup> Hf  | ±1σ      | <sup>177</sup> Hf  | ±1σ      |      |      |                  |                  |           |
| Xuelongba<br>o pluton |           | MPS1-26 | 806  | 8        | 0.007994           | 0.000224 | 0.000369           | 0.000009 | 0.282442           | 0.000011 | 5.93 | 0.40 | 1.13             | 1.34             |           |
|                       |           | MPS1-27 | 774  | 6        | 0.03543            | 0.000978 | 0.001598           | 0.000048 | 0.282476           | 0.000012 | 5.82 | 0.44 | 1.12             | 1.32             |           |
|                       |           | MPS1-28 | 810  | 17       | 0.008391           | 0.000345 | 0.000385           | 0.000011 | 0.282403           | 0.000011 | 4.60 | 0.38 | 1.18             | 1.42             |           |
|                       |           | MPS2-1  | 780  | 7        | 0.021833           | 0.000398 | 0.000955           | 0.000014 | 0.282449           | 0.000015 | 5.30 | 0.53 | 1.14             | 1.36             |           |
|                       |           | MPS2-2  | 771  | 7        | 0.026453           | 0.000302 | 0.001128           | 0.000011 | 0.282442           | 0.000012 | 4.77 | 0.40 | 1.15             | 1.38             |           |
|                       |           | MPS2-3  | 761  | 7        | 0.030606           | 0.000624 | 0.001341           | 0.000028 | 0.282463           | 0.000013 | 5.19 | 0.44 | 1.13             | 1.35             |           |
|                       |           | MPS2-4  | 777  | 6        | 0.025979           | 0.000154 | 0.001101           | 0.000007 | 0.282433           | 0.000011 | 4.60 | 0.37 | 1.16             | 1.40             |           |
|                       |           | MPS2-5  | 808  | 7        | 0.025495           | 0.000470 | 0.001004           | 0.000019 | 0.282328           | 0.000015 | 1.60 | 0.51 | 1.31             | 1.62             |           |
|                       |           | MPS2-6  | 782  | 6        | 0.03133            | 0.001083 | 0.001241           | 0.000032 | 0.28243            | 0.000013 | 4.54 | 0.45 | 1.17             | 1.41             |           |
|                       |           | MPS2-7  | 783  | 6        | 0.031398           | 0.000592 | 0.001322           | 0.000021 | 0.282403           | 0.000011 | 3.56 | 0.40 | 1.21             | 1.47             |           |
|                       |           | MPS2-8  | 779  | 7        | 0.028134           | 0.000269 | 0.001214           | 0.000012 | 0.282438           | 0.000014 | 4.75 | 0.51 | 1.16             | 1.39             |           |
|                       |           | MPS2-9  | 787  | 8        | 0.019948           | 0.000372 | 0.000921           | 0.000018 | 0.282457           | 0.000012 | 5.74 | 0.41 | 1.12             | 1.33             |           |
|                       |           | MPS2-10 | 779  | 7        | 0.025257           | 0.001845 | 0.001144           | 0.000086 | 0.282455           | 0.000013 | 5.38 | 0.44 | 1.13             | 1.35             |           |
|                       |           | MPS2-11 | 781  | 8        | 0.027802           | 0.001065 | 0.001168           | 0.000038 | 0.28244            | 0.000016 | 4.90 | 0.55 | 1.15             | 1.38             |           |
|                       |           | MPS2-12 | 776  | 7        | 0.019062           | 0.000222 | 0.00082            | 0.000009 | 0.282412           | 0.000013 | 3.98 | 0.44 | 1.18             | 1.44             |           |
|                       |           | MPS2-13 | 772  | 7        | 0.018494           | 0.000587 | 0.000793           | 0.000023 | 0.282419           | 0.000012 | 4.15 | 0.43 | 1.17             | 1.42             |           |
|                       |           | MPS2-14 | 870  | 12       | 0.028459           | 0.002173 | 0.001191           | 0.000090 | 0.282426           | 0.000014 | 6.30 | 0.50 | 1.17             | 1.36             |           |
|                       |           | MPS2-15 | 785  | 7        | 0.024302           | 0.000322 | 0.001043           | 0.000013 | 0.282434           | 0.000011 | 4.84 | 0.39 | 1.16             | 1.39             |           |
|                       |           | MPS2-16 | 780  | 6        | 0.028627           | 0.000635 | 0.001188           | 0.000023 | 0.282434           | 0.000013 | 4.65 | 0.46 | 1.16             | 1.40             |           |
|                       |           | MPS2-17 | 783  | 6        | 0.032474           | 0.000436 | 0.001375           | 0.000017 | 0.282412           | 0.000013 | 3.83 | 0.45 | 1.20             | 1.45             |           |
|                       |           | MPS2-18 | 781  | 6        | 0.029402           | 0.000704 | 0.001242           | 0.000032 | 0.282421           | 0.000011 | 4.15 | 0.40 | 1.18             | 1.43             |           |
|                       |           | MPS2-19 | 781  | 6        | 0.026459           | 0.000860 | 0.001164           | 0.000043 | 0.282432           | 0.000012 | 4.62 | 0.42 | 1.16             | 1.40             |           |
|                       |           | MPS2-20 | 823  | 7        | 0.025564           | 0.000538 | 0.001048           | 0.000021 | 0.282436           | 0.000013 | 5.71 | 0.46 | 1.16             | 1.36             |           |
|                       |           | MPS2-21 | 790  | 7        | 0.031537           | 0.000829 | 0.001261           | 0.000034 | 0.282425           | 0.000013 | 4.49 | 0.45 | 1.18             | 1.42             |           |
|                       |           | MPS2-22 | 780  | 7        | 0.033038           | 0.001946 | 0.001379           | 0.000078 | 0.282453           | 0.000012 | 5.24 | 0.43 | 1.14             | 1.36             |           |
|                       |           | MPS2-23 | 779  | 8        | 0.018528           | 0.000426 | 0.000782           | 0.000017 | 0.282419           | 0.000012 | 4.32 | 0.42 | 1.17             | 1.42             |           |
|                       | MPS2-24   | 779     | 6    | 0.028653 | 0.000651           | 0.00118  | 0.000027           | 0.282327 | 0.000015           | 0.83     | 0.54 | 1.31 | 1.64             |                  |           |
|                       | XLB4-1    | 750     | 10   | 0.007407 | 0.000103           | 0.00035  | 0.000006           | 0.282559 | 0.000013           | 8.83     | 0.47 | 0.97 | 1.11             |                  |           |
|                       | XLB4-2    | 743     | 6    | 0.019828 | 0.000555           | 0.000944 | 0.000027           | 0.28258  | 0.000013           | 9.12     | 0.45 | 0.95 | 1.08             |                  |           |



**Table S4: The isotope results for the Neoproterozoic mafic and adakitic pluton in the western margin of the Yangtze Block**

| Locality | Rock type | Spot    | Best |               | Isotopic ratio     |               |                    |               |                    |               | $\epsilon\text{Hf}$ | $\pm 1\sigma$ | $T_{\text{DM1}}$ | $T_{\text{DM2}}$ | Reference |
|----------|-----------|---------|------|---------------|--------------------|---------------|--------------------|---------------|--------------------|---------------|---------------------|---------------|------------------|------------------|-----------|
|          |           |         | age  |               | $^{176}\text{Yb}/$ |               | $^{176}\text{Lu}/$ |               | $^{176}\text{Hf}/$ |               |                     |               |                  |                  |           |
|          |           |         | (Ma) | $\pm 1\sigma$ | $^{177}\text{Hf}$  | $\pm 1\sigma$ | $^{177}\text{Hf}$  | $\pm 1\sigma$ | $^{177}\text{Hf}$  | $\pm 1\sigma$ |                     |               |                  |                  |           |
|          |           | XLB4-3  | 776  | 10            | 0.012378           | 0.000070      | 0.000564           | 0.000004      | 0.28257            | 0.000013      | 9.70                | 0.46          | 0.95             | 1.07             |           |
|          |           | XLB4-4  | 734  | 8             | 0.013973           | 0.000341      | 0.00063            | 0.000017      | 0.282576           | 0.000012      | 8.98                | 0.44          | 0.95             | 1.09             |           |
|          |           | XLB4-5  | 730  | 8             | 0.006858           | 0.000062      | 0.000323           | 0.000002      | 0.28255            | 0.000012      | 8.11                | 0.43          | 0.98             | 1.14             |           |
|          |           | XLB4-6  | 746  | 10            | 0.009716           | 0.000197      | 0.000452           | 0.000008      | 0.282563           | 0.000012      | 8.84                | 0.42          | 0.96             | 1.10             |           |
|          |           | XLB4-7  | 757  | 9             | 0.019158           | 0.000271      | 0.000889           | 0.000011      | 0.282579           | 0.000012      | 9.46                | 0.41          | 0.95             | 1.07             |           |
|          |           | XLB4-8  | 766  | 11            | 0.022602           | 0.001030      | 0.00104            | 0.000048      | 0.282571           | 0.000015      | 9.25                | 0.53          | 0.97             | 1.09             |           |
|          |           | XLB4-9  | 742  | 10            | 0.011295           | 0.000261      | 0.000525           | 0.000012      | 0.28258            | 0.000016      | 9.34                | 0.54          | 0.94             | 1.07             |           |
|          |           | XLB4-10 | 745  | 9             | 0.01417            | 0.000356      | 0.000627           | 0.000014      | 0.282553           | 0.000016      | 8.40                | 0.56          | 0.98             | 1.13             |           |
|          |           | XLB4-11 | 751  | 9             | 0.021              | 0.000129      | 0.000924           | 0.000006      | 0.282554           | 0.000014      | 8.42                | 0.48          | 0.99             | 1.13             |           |
|          |           | XLB4-12 | 746  | 9             | 0.012589           | 0.000297      | 0.000569           | 0.000014      | 0.282559           | 0.000014      | 8.64                | 0.49          | 0.97             | 1.12             |           |
|          |           | XLB4-13 | 729  | 9             | 0.020003           | 0.000560      | 0.000891           | 0.000025      | 0.282585           | 0.000015      | 9.06                | 0.53          | 0.94             | 1.08             |           |
|          |           | XLB4-14 | 733  | 10            | 0.010286           | 0.000698      | 0.000485           | 0.000032      | 0.282573           | 0.000012      | 8.88                | 0.42          | 0.95             | 1.09             |           |
|          |           | XLB4-15 | 743  | 8             | 0.015105           | 0.000409      | 0.000677           | 0.000017      | 0.282565           | 0.000013      | 8.74                | 0.45          | 0.97             | 1.11             |           |
|          |           | XLB4-16 | 740  | 9             | 0.013738           | 0.000442      | 0.000615           | 0.000019      | 0.282556           | 0.000012      | 8.40                | 0.42          | 0.98             | 1.13             |           |
|          |           | XLB4-17 | 745  | 9             | 0.009884           | 0.000205      | 0.000459           | 0.000009      | 0.282559           | 0.000011      | 8.70                | 0.40          | 0.97             | 1.11             |           |
|          |           | XLB4-18 | 739  | 9             | 0.008854           | 0.000130      | 0.000418           | 0.000006      | 0.28258            | 0.000013      | 9.33                | 0.45          | 0.94             | 1.07             |           |
|          |           | XLB4-19 | 741  | 8             | 0.013768           | 0.000104      | 0.000672           | 0.000005      | 0.282577           | 0.000012      | 9.14                | 0.41          | 0.95             | 1.08             |           |
|          |           | XLB4-20 | 740  | 10            | 0.009198           | 0.000155      | 0.000433           | 0.000007      | 0.282557           | 0.000013      | 8.52                | 0.46          | 0.97             | 1.12             |           |
|          |           | XLB4-21 | 752  | 8             | 0.014483           | 0.000441      | 0.000695           | 0.000020      | 0.282551           | 0.000013      | 8.45                | 0.46          | 0.98             | 1.13             |           |
|          |           | XLB4-22 | 763  | 11            | 0.010363           | 0.000063      | 0.00048            | 0.000003      | 0.282564           | 0.000012      | 9.25                | 0.41          | 0.96             | 1.09             |           |
|          |           | XLB4-23 | 740  | 7             | 0.023718           | 0.001106      | 0.001043           | 0.000046      | 0.282567           | 0.000012      | 8.58                | 0.41          | 0.97             | 1.12             |           |
|          |           | XLB4-24 | 754  | 9             | 0.00826            | 0.000303      | 0.000389           | 0.000013      | 0.28257            | 0.000013      | 9.30                | 0.45          | 0.95             | 1.08             |           |
|          |           | XLB4-25 | 769  | 11            | 0.01621            | 0.000087      | 0.00075            | 0.000005      | 0.282576           | 0.000013      | 9.66                | 0.46          | 0.95             | 1.07             |           |
|          |           | XLB4-26 | 859  | 17            | 0.013985           | 0.000402      | 0.000646           | 0.000018      | 0.282568           | 0.000017      | 11.41               | 0.58          | 0.96             | 1.03             |           |
|          |           | XLB4-27 | 791  | 10            | 0.010904           | 0.000284      | 0.000505           | 0.000011      | 0.282562           | 0.000012      | 9.76                | 0.42          | 0.97             | 1.08             |           |
|          |           | XLB4-28 | 778  | 5             | 0.013027           | 0.000622      | 0.000607           | 0.000031      | 0.282575           | 0.000012      | 9.90                | 0.43          | 0.95             | 1.06             |           |
|          |           | XLB4-29 | 778  | 9             | 0.009111           | 0.000052      | 0.000423           | 0.000002      | 0.282565           | 0.000012      | 9.62                | 0.43          | 0.96             | 1.08             |           |
|          |           | XLB4-30 | 774  | 9             | 0.019257           | 0.000351      | 0.000877           | 0.000016      | 0.282576           | 0.000013      | 9.71                | 0.47          | 0.95             | 1.07             |           |
